# Supplementary material for: Gene Expression Profiles Associated with Brain Aging are Altered in Schizophrenia
Source: PubMed Central journal article supplement (PMC6459977; doi:10.1038/s41598-019-42308-5), 2019-04-11
Supplement: 41598_2019_42308_MOESM1_ESM.pdf [file 41598_2019_42308_MOESM1_ESM.pdf]

## **Supplementary Materials**

### **Gene Expression Profiles Associated with Brain Aging are Altered in Schizophrenia**

Sarven Sabunciyani\*, Ph.D.

Department of Pediatrics, Johns Hopkins University, Baltimore, MD 21287

Supplementary Figure 1  
(100 plots)

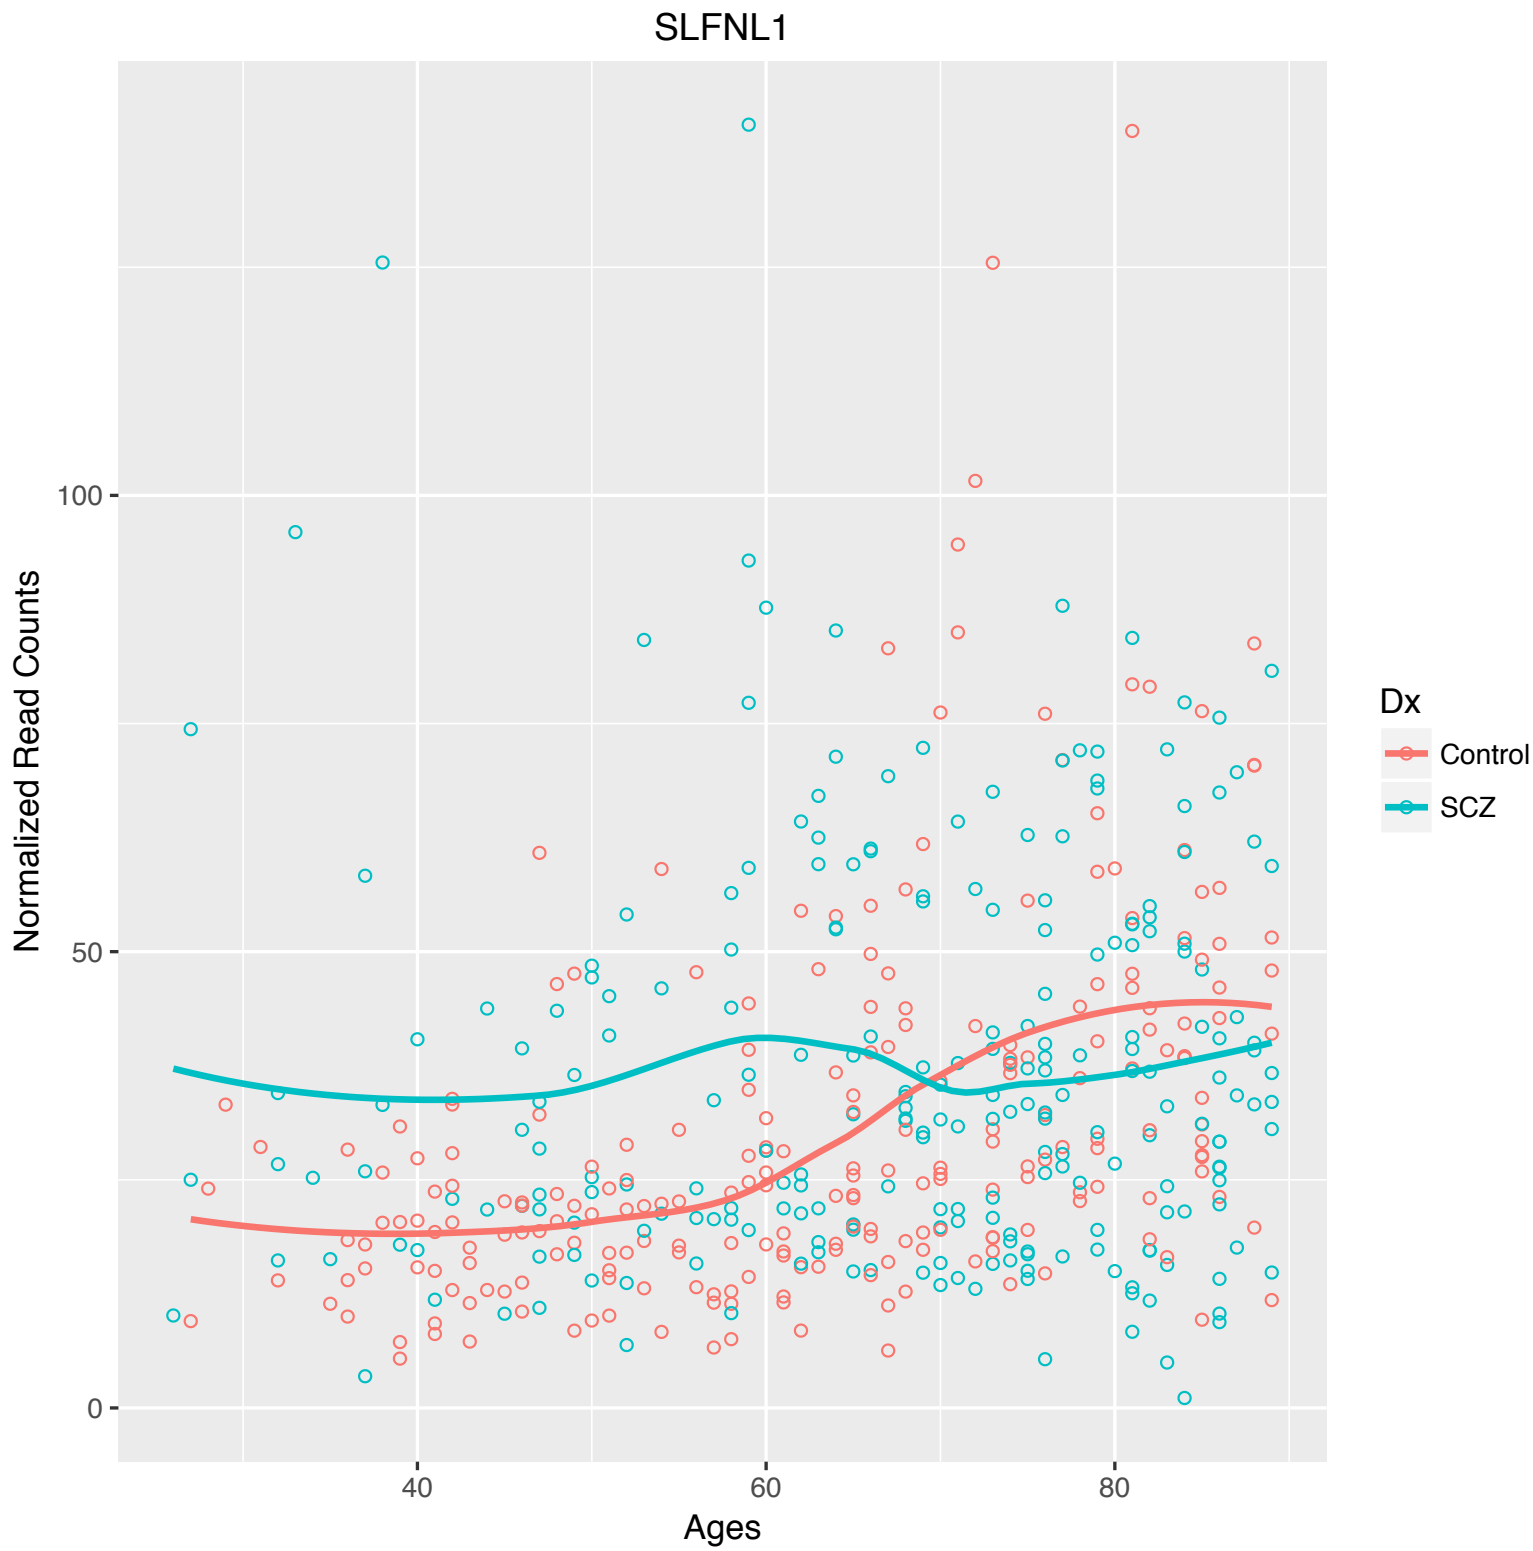

# SMAD1-AS2

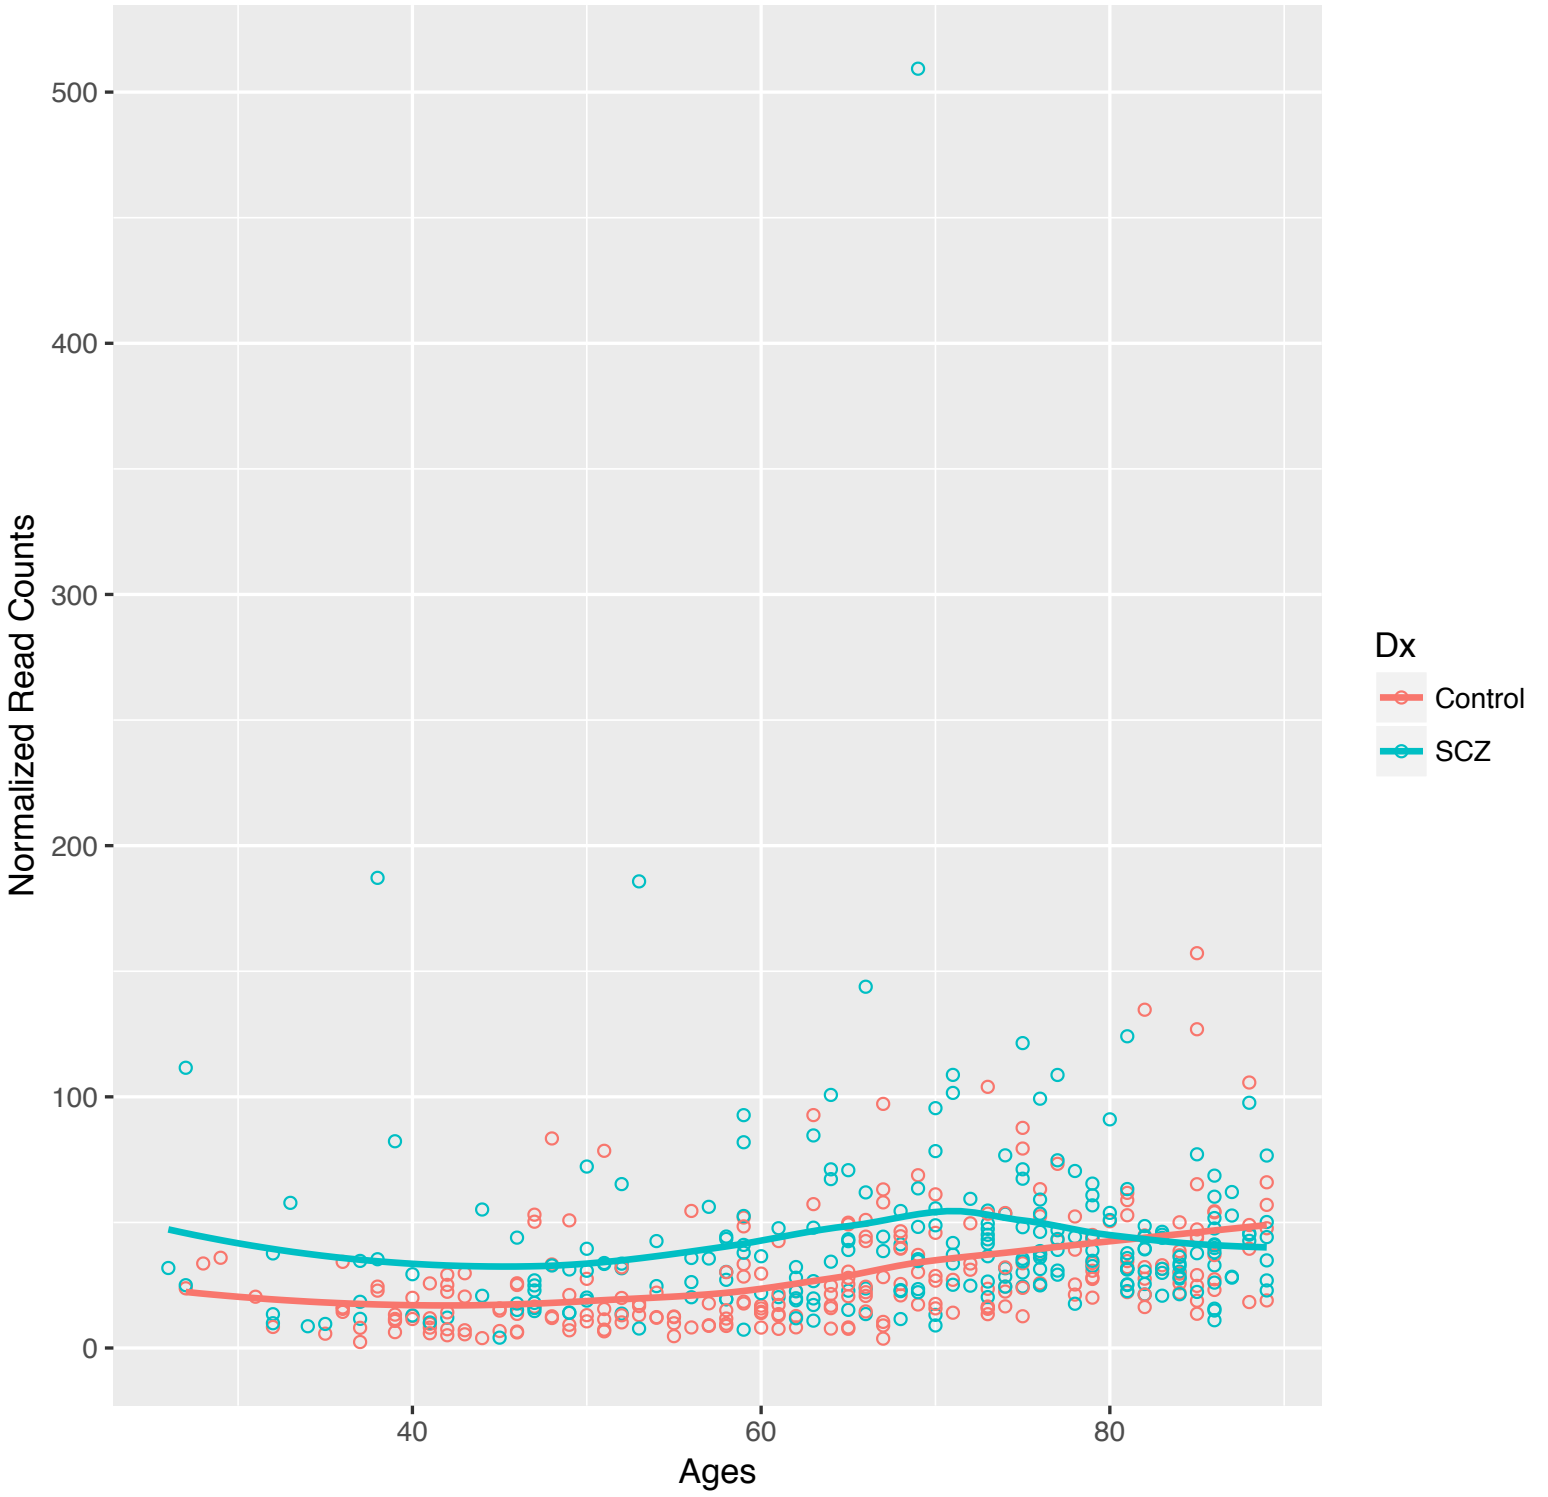

# KLHL5

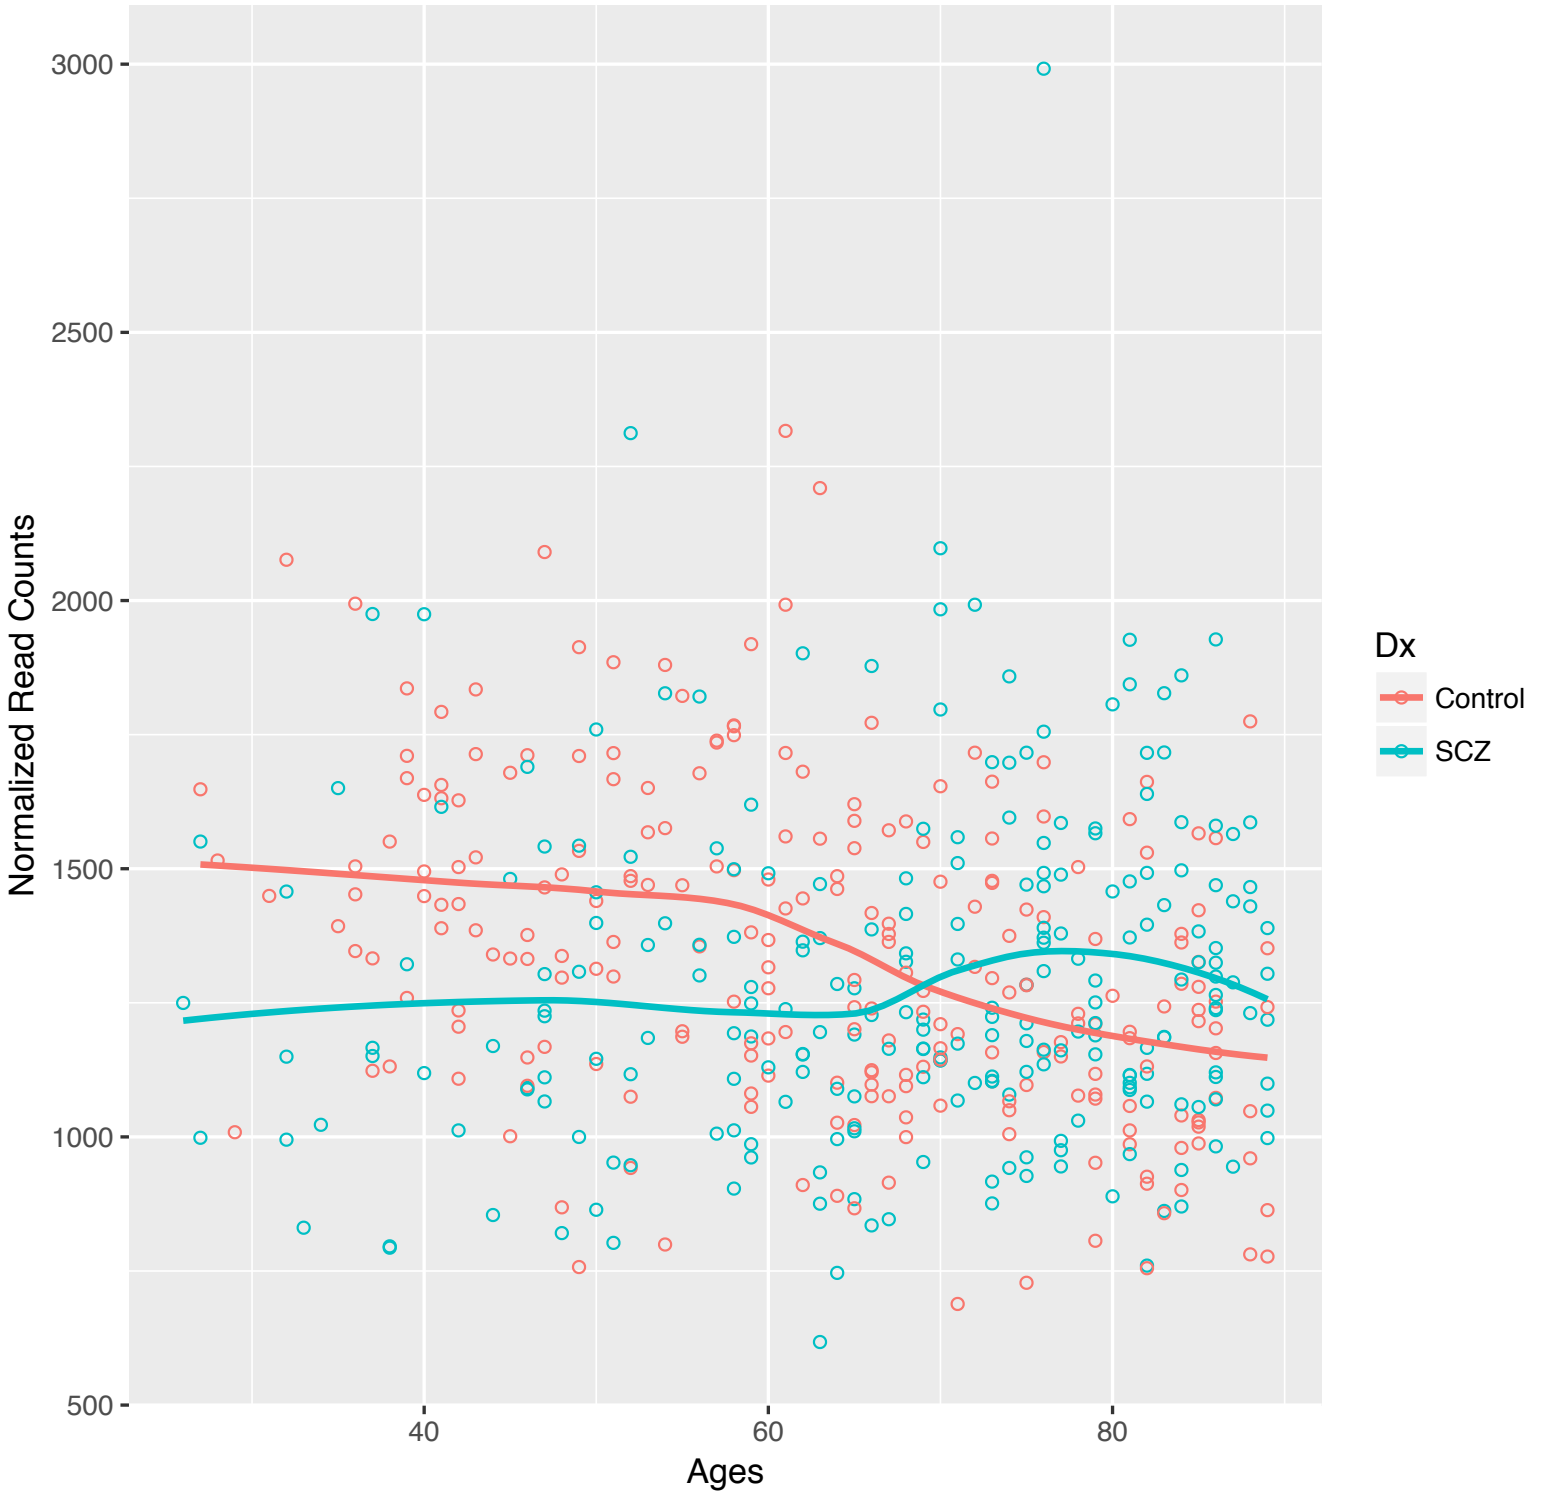

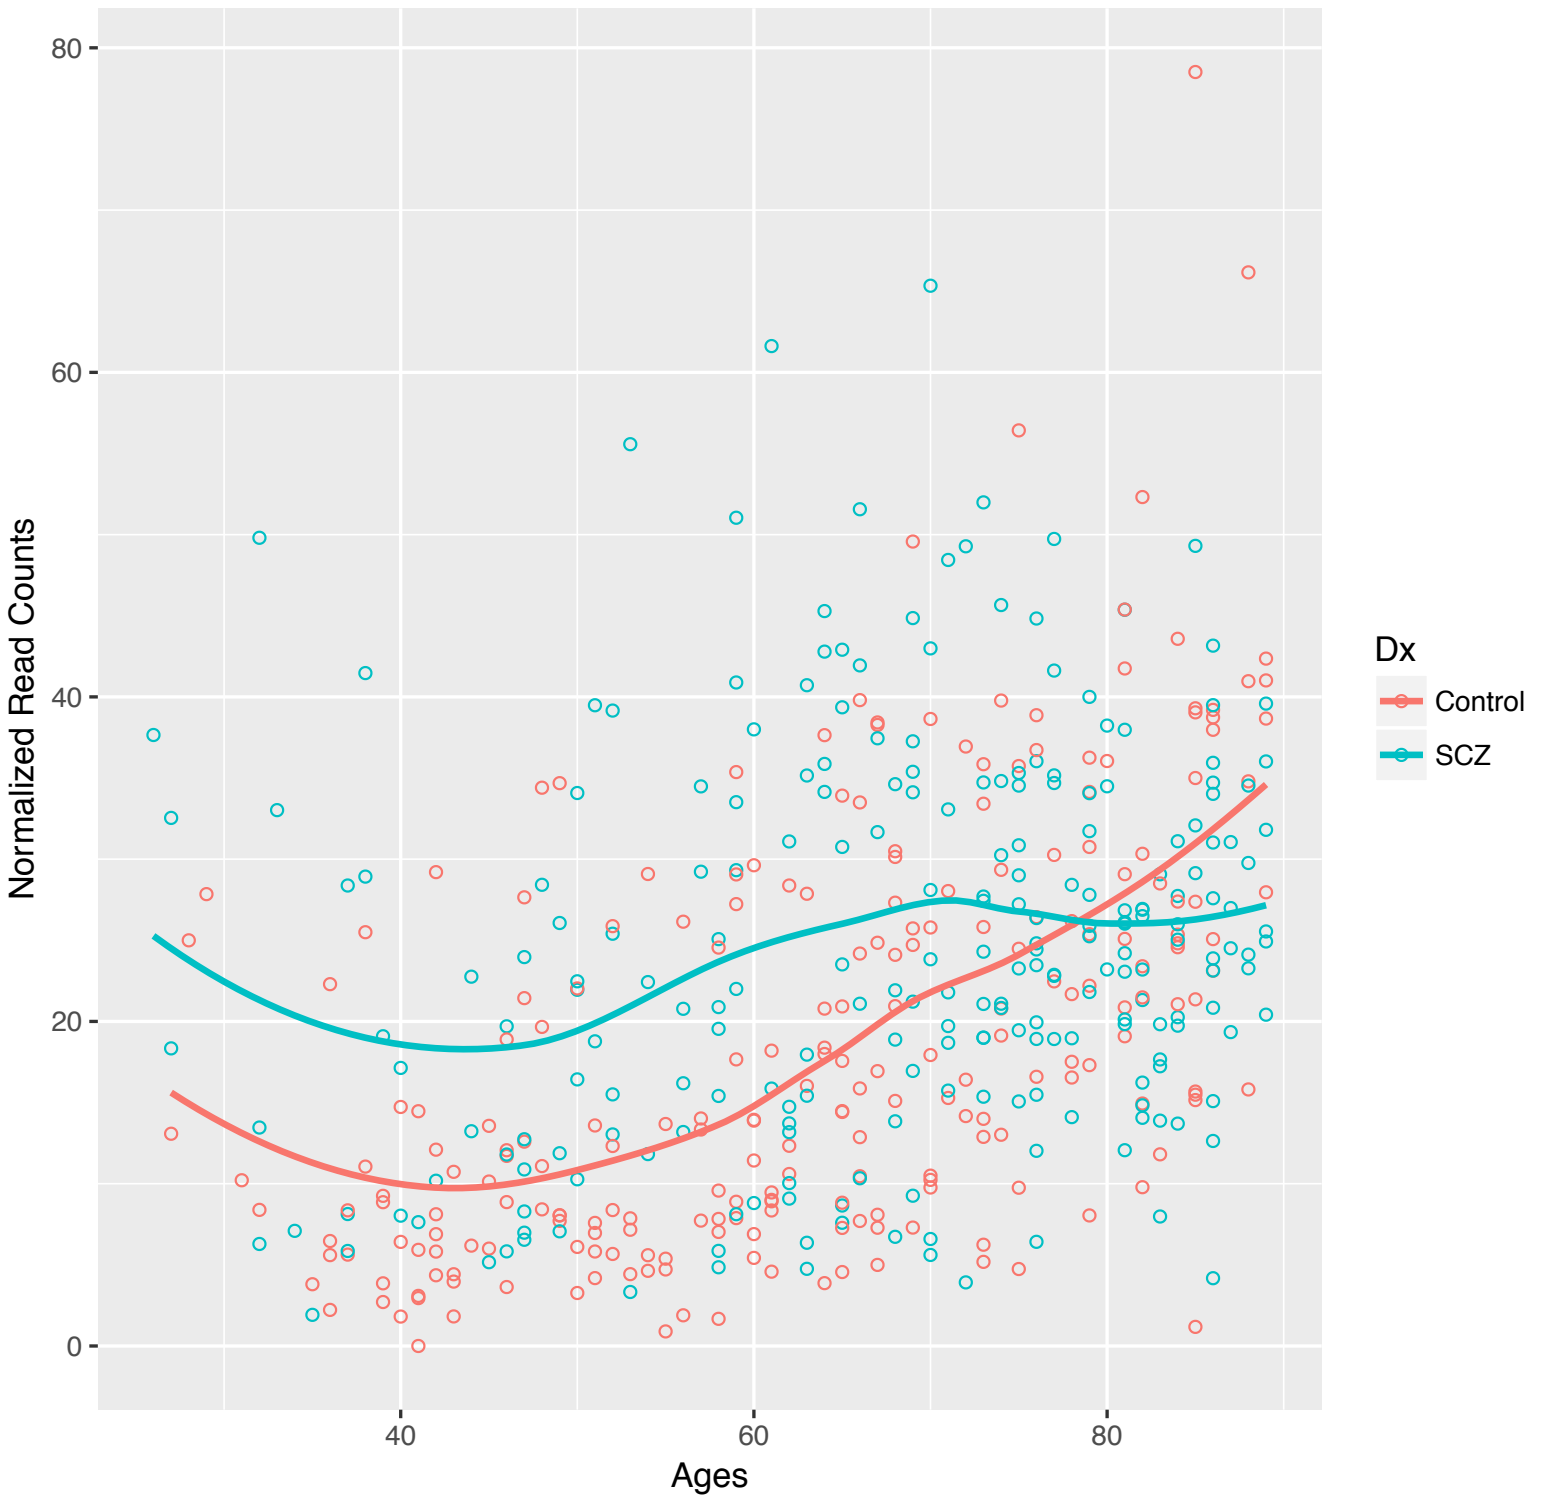

# MKNK2

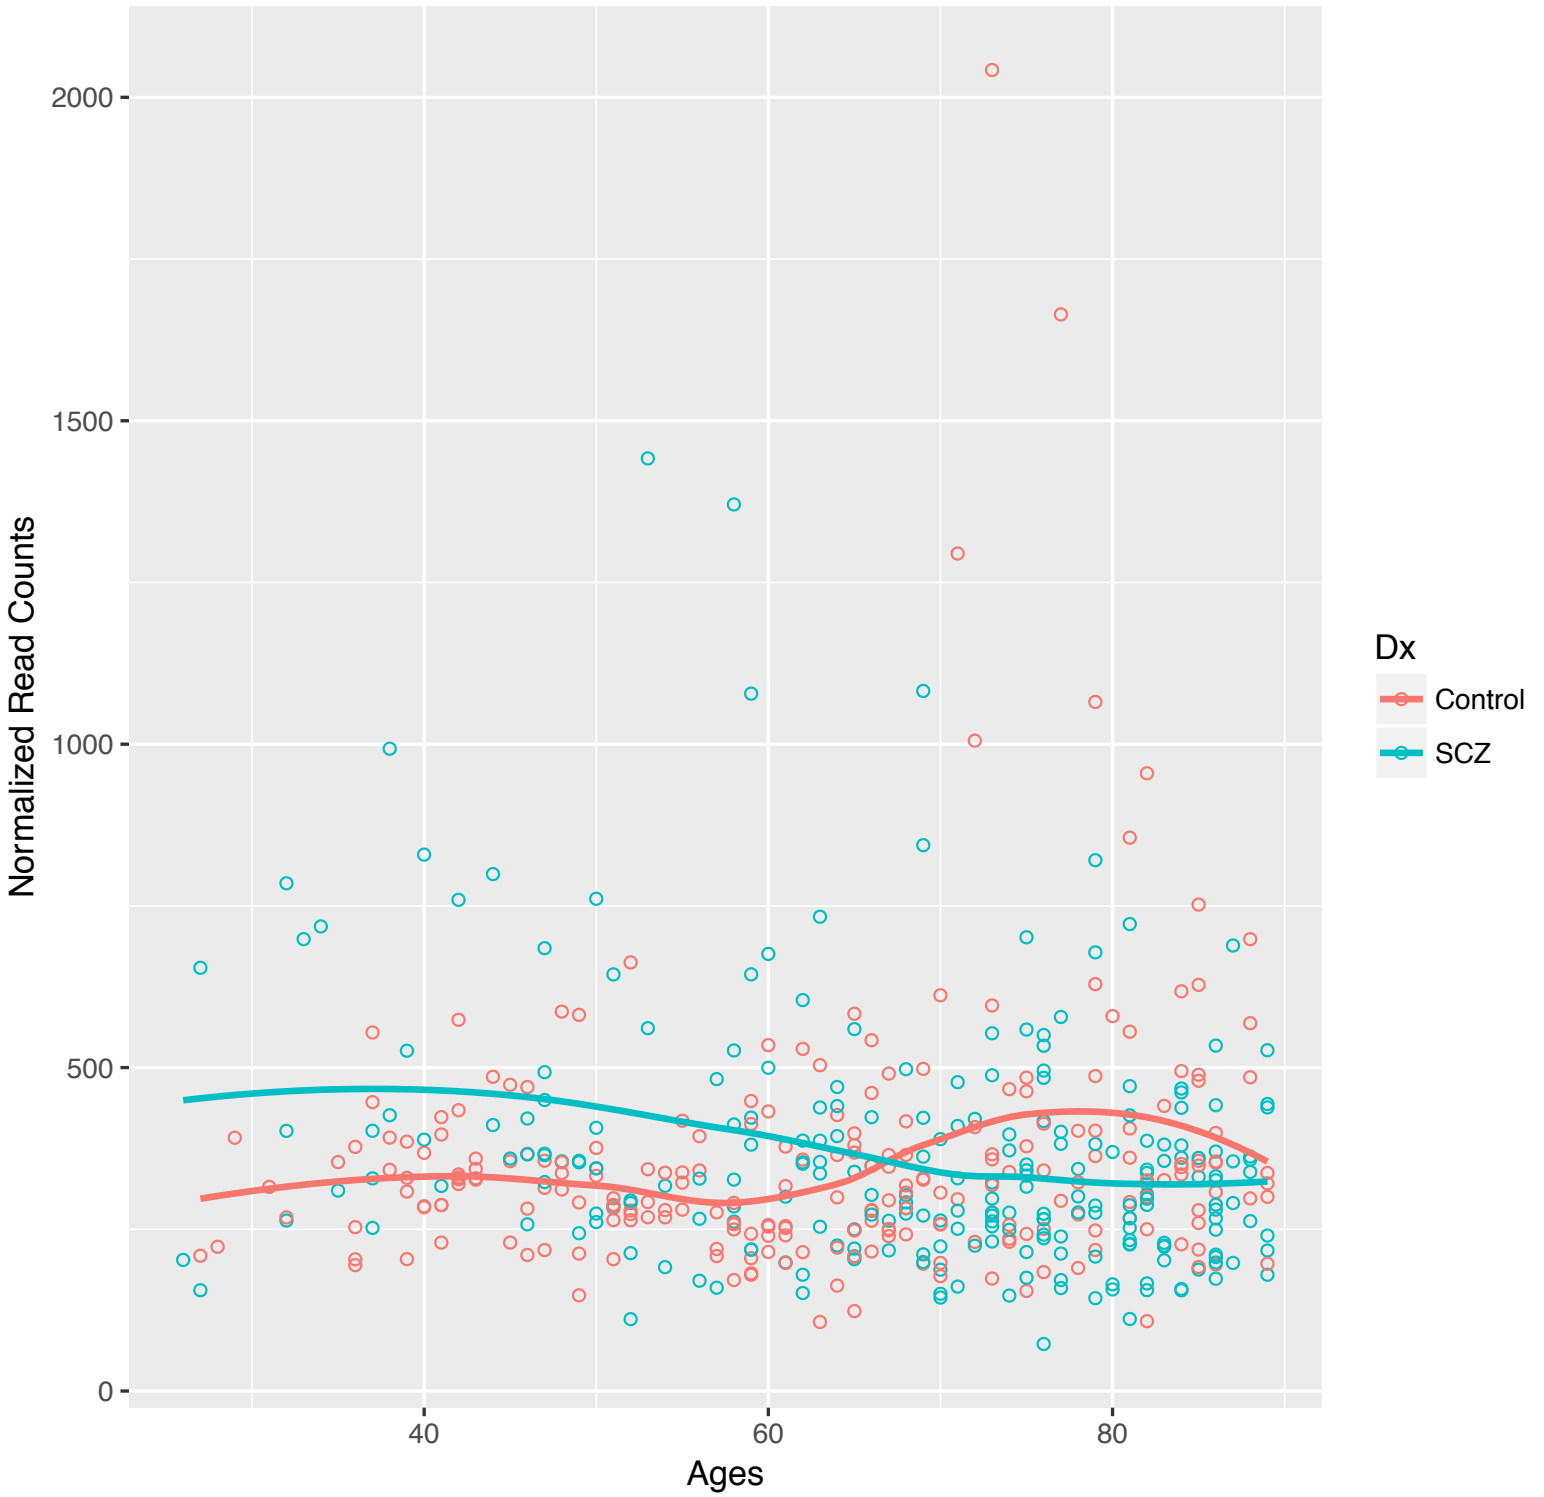

# RBM14

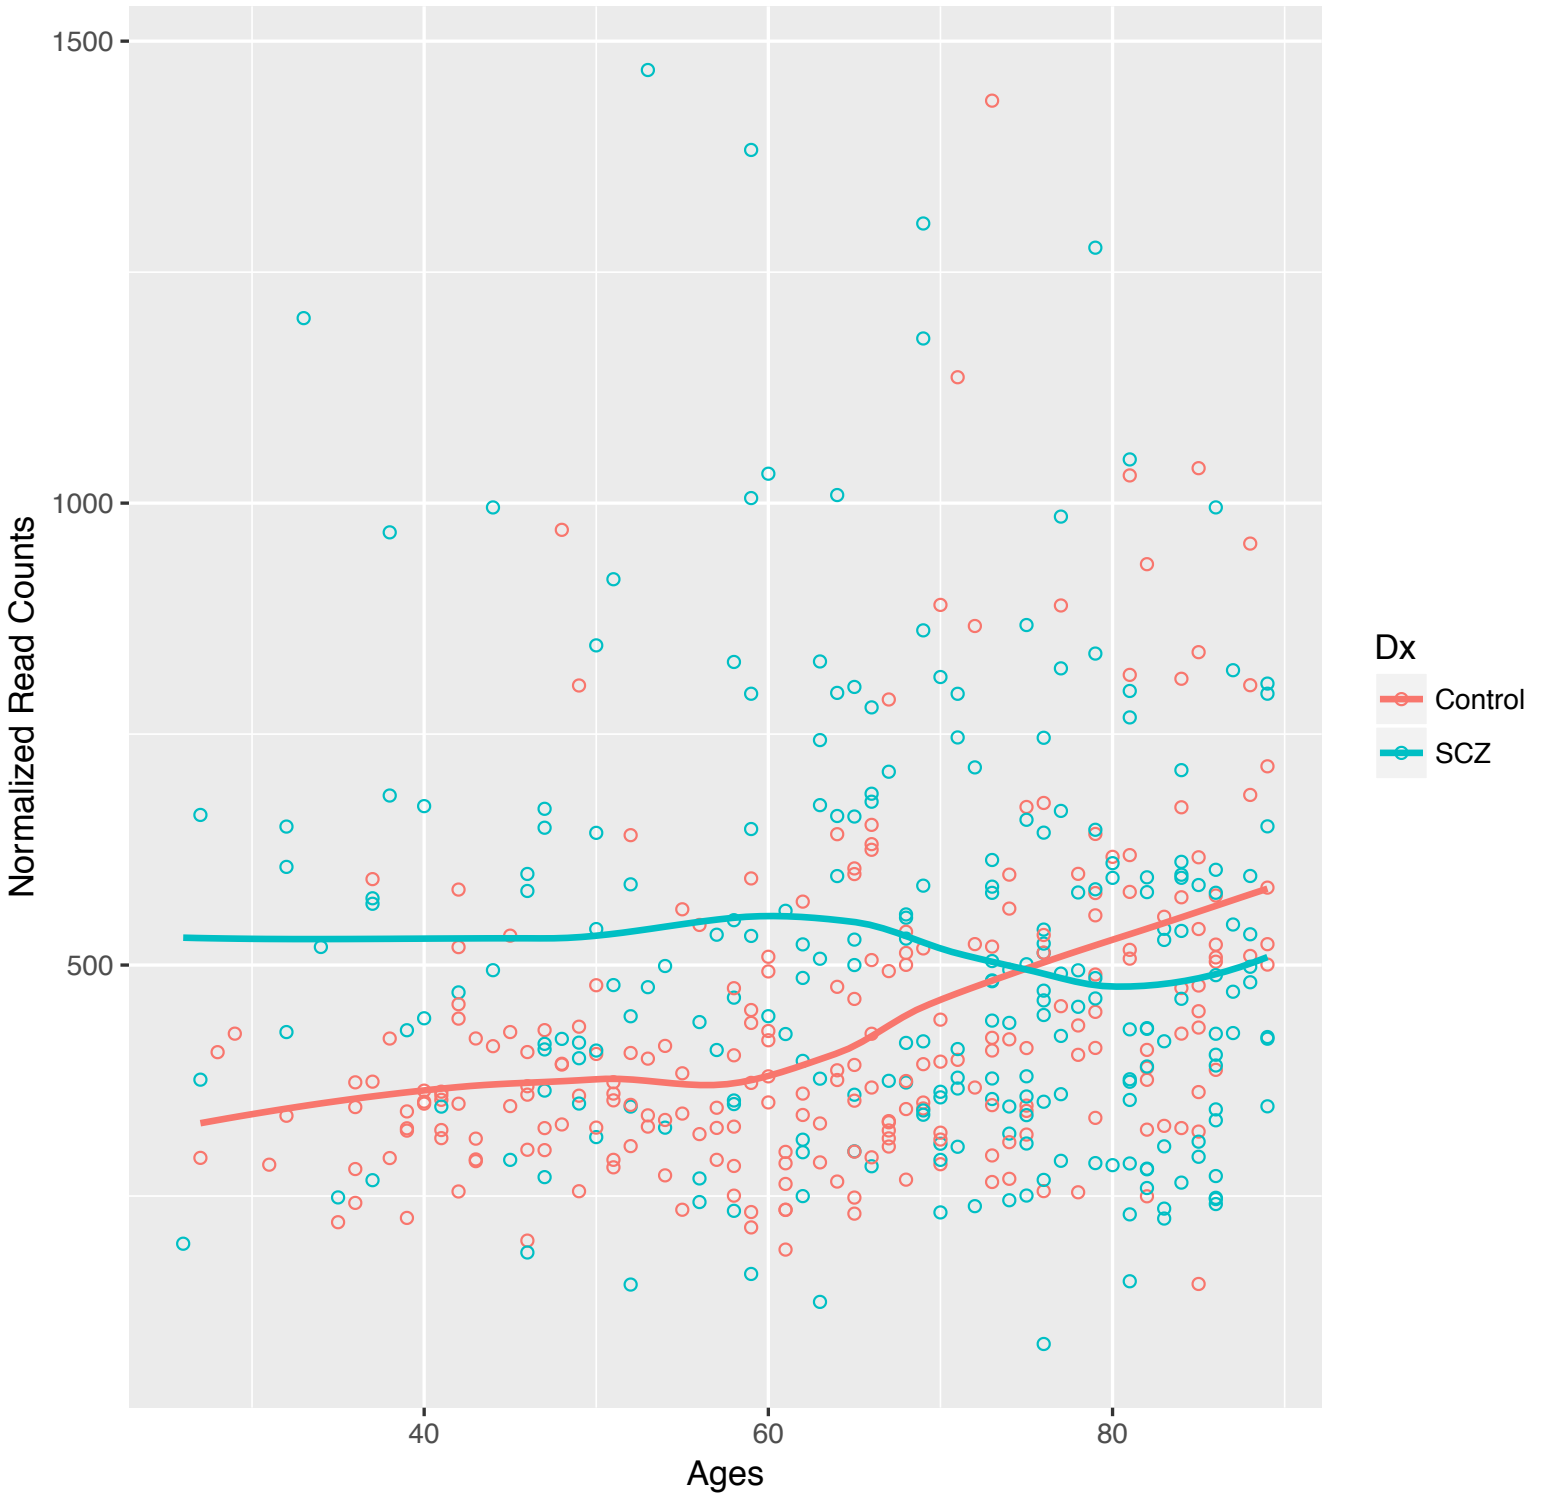

# GLB1L2

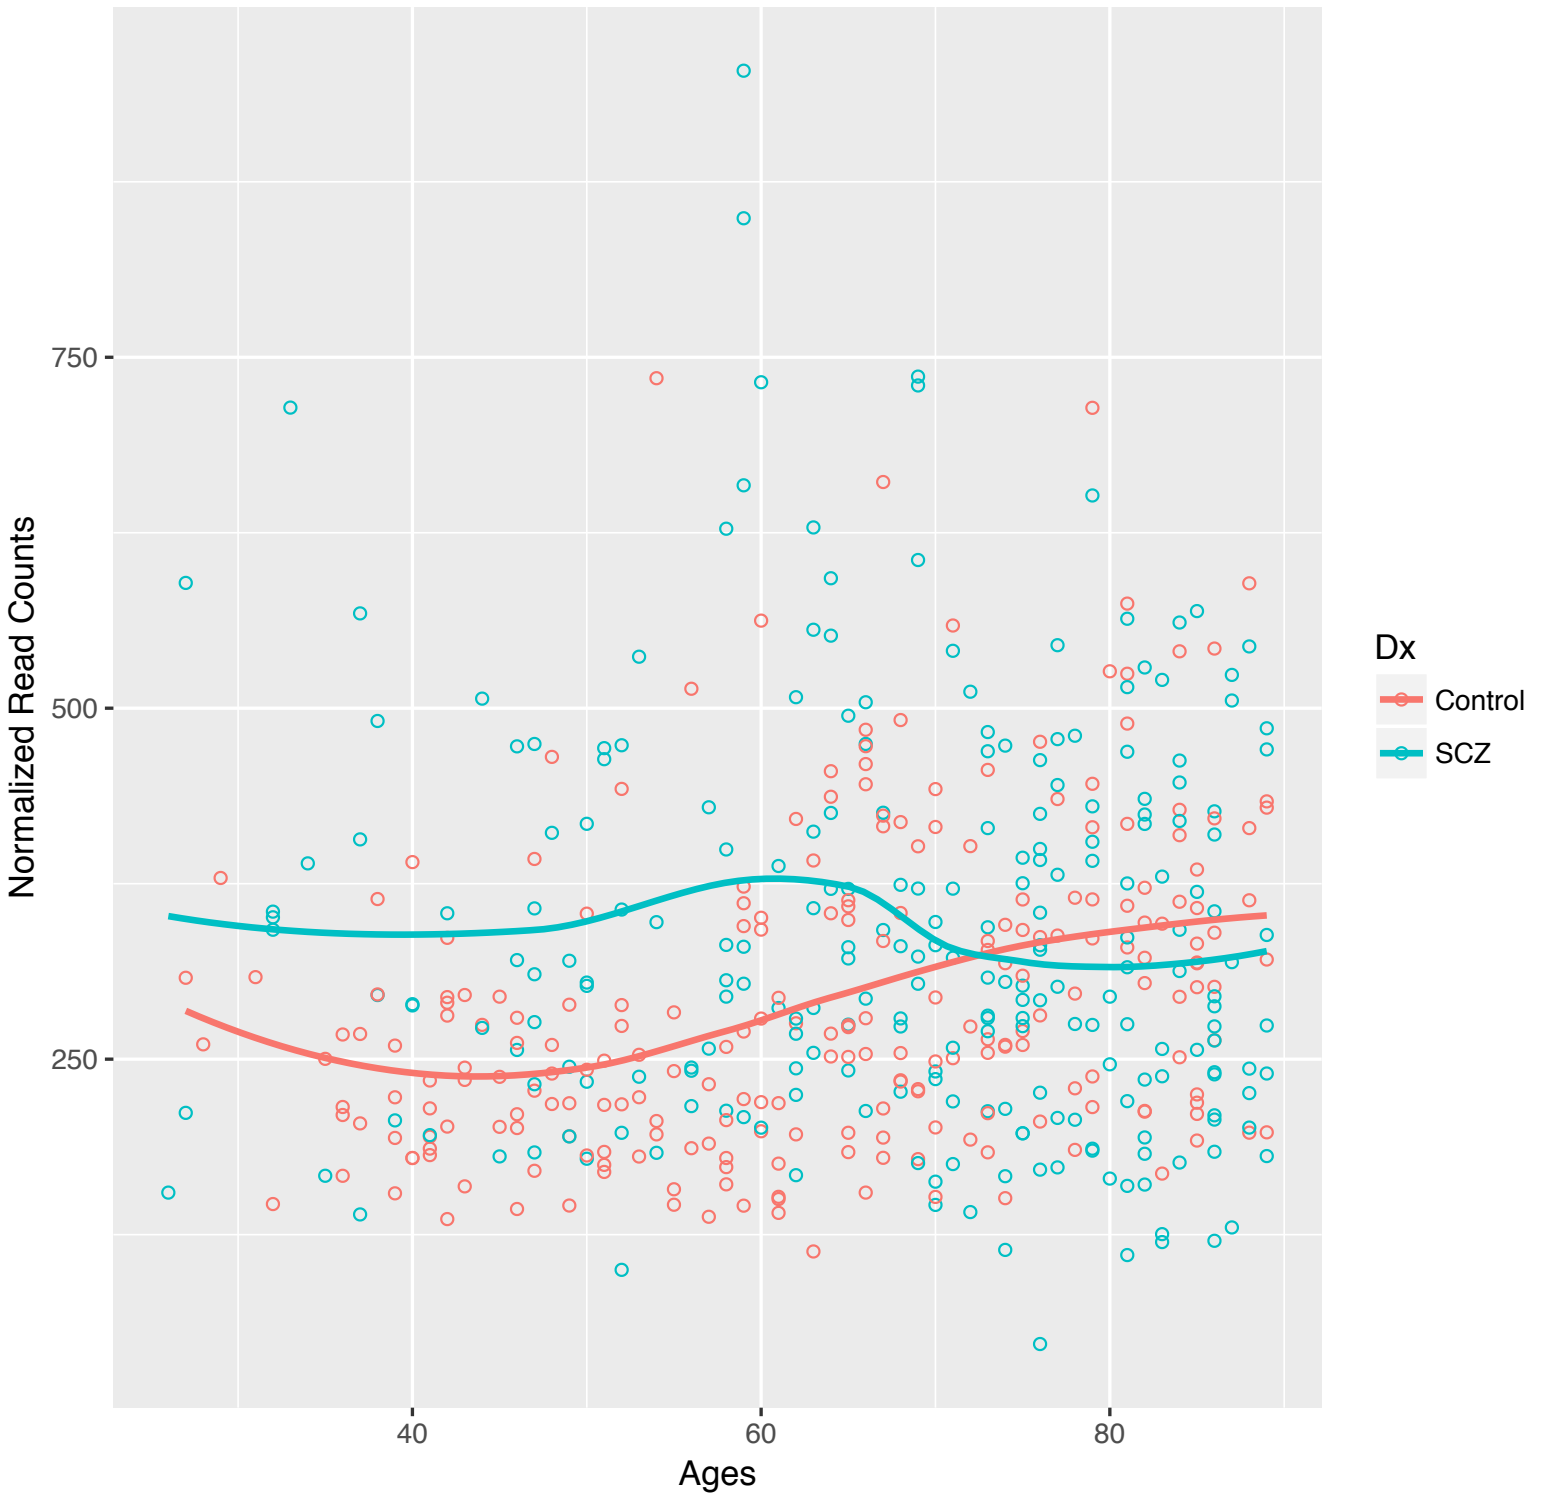



# SLC10A1

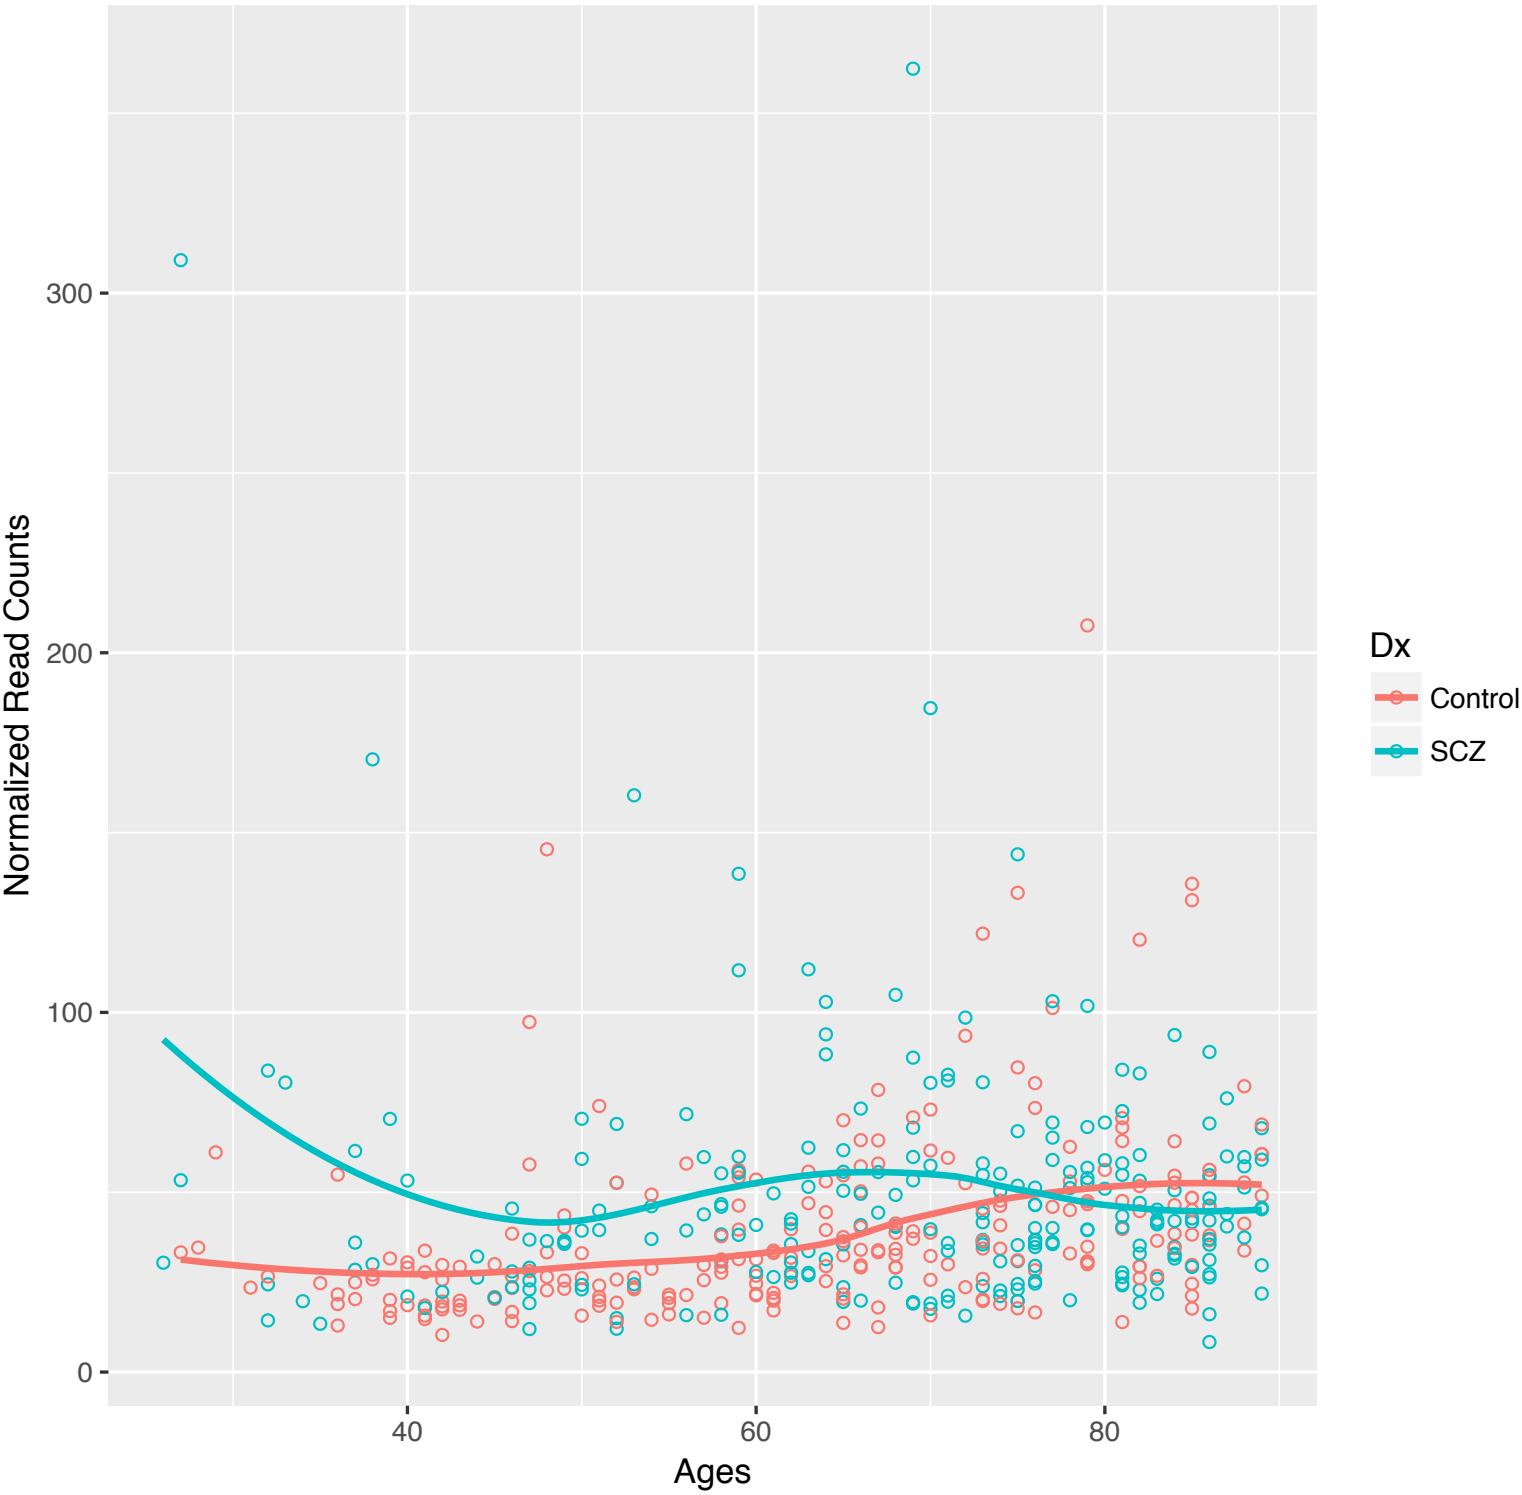

# C9orf131

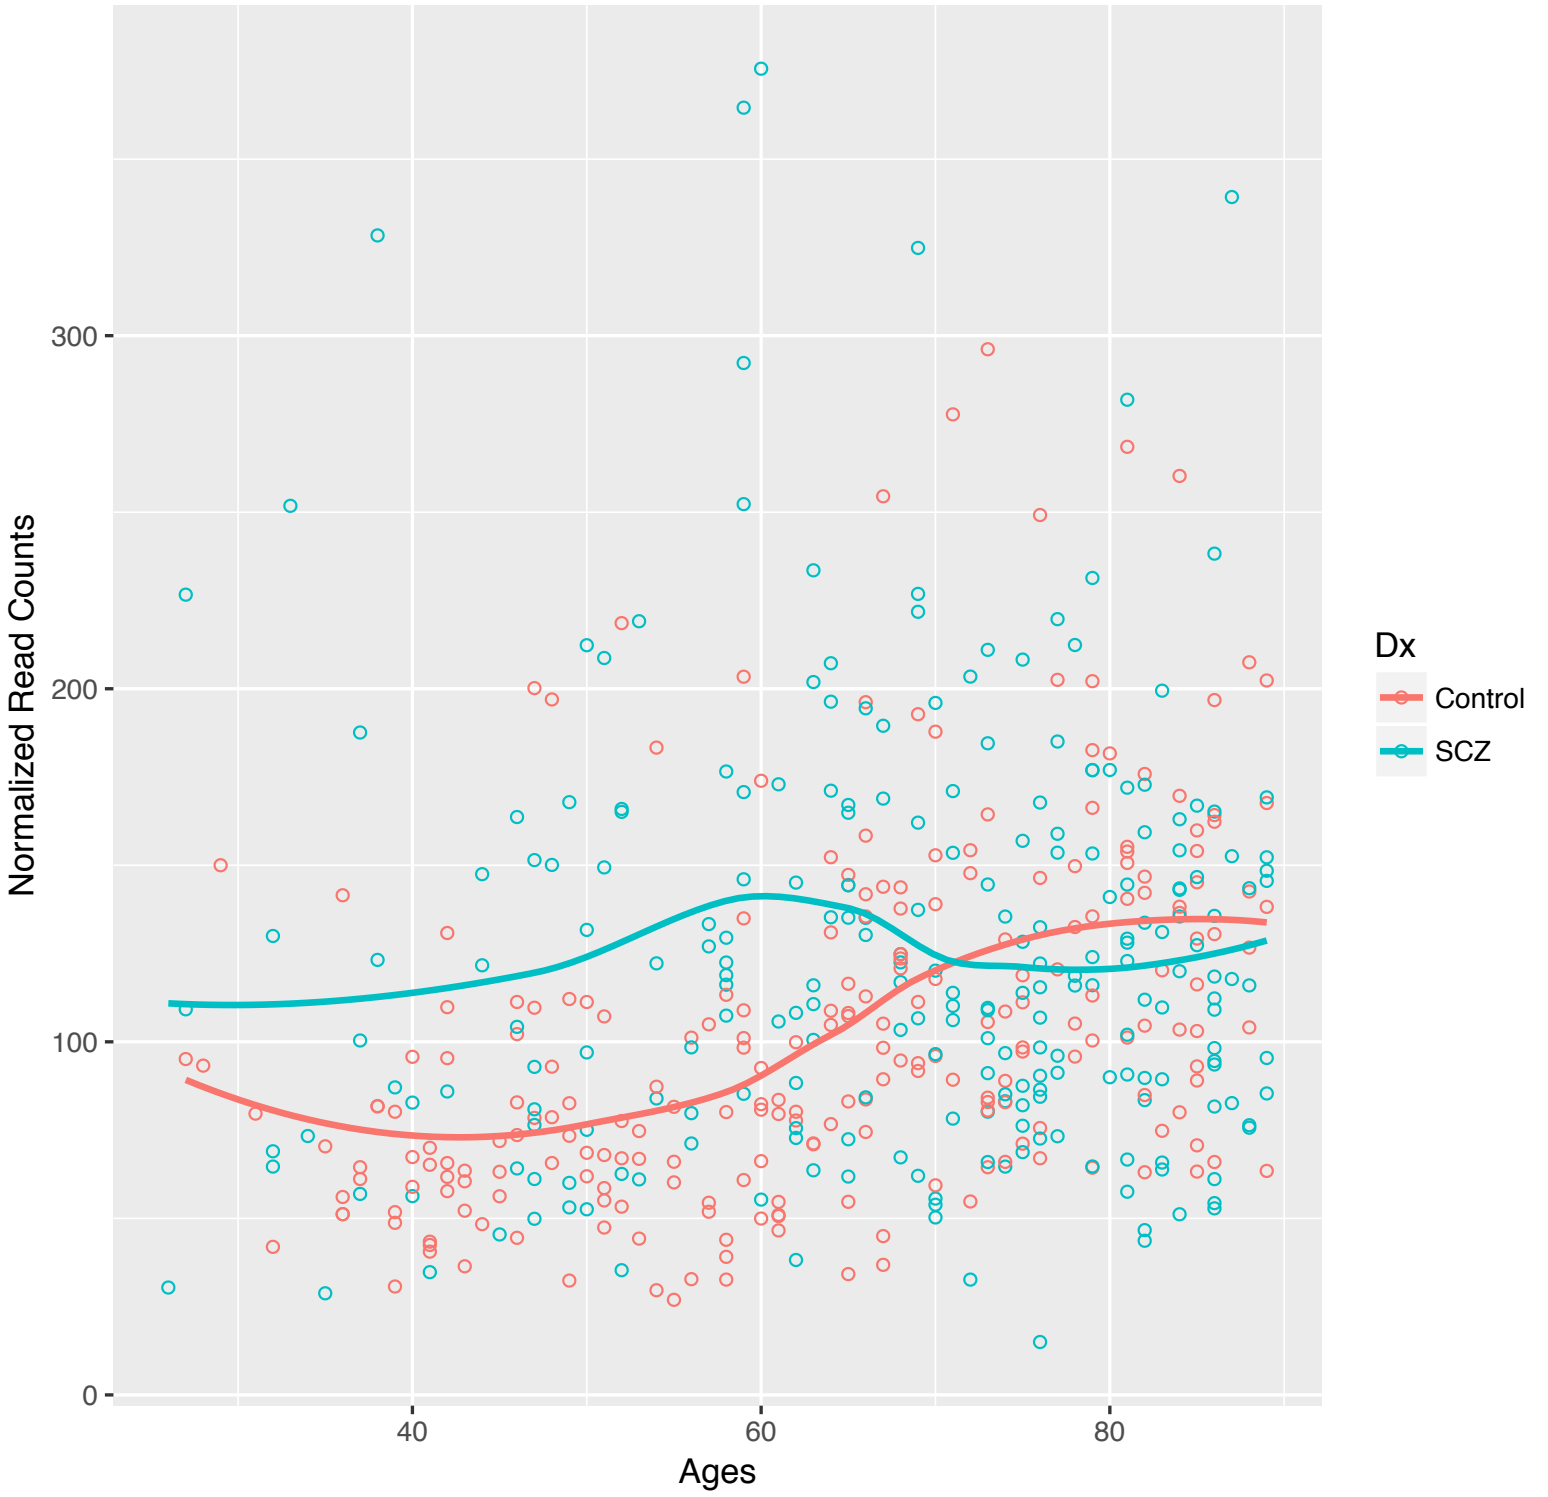

# PDE6C

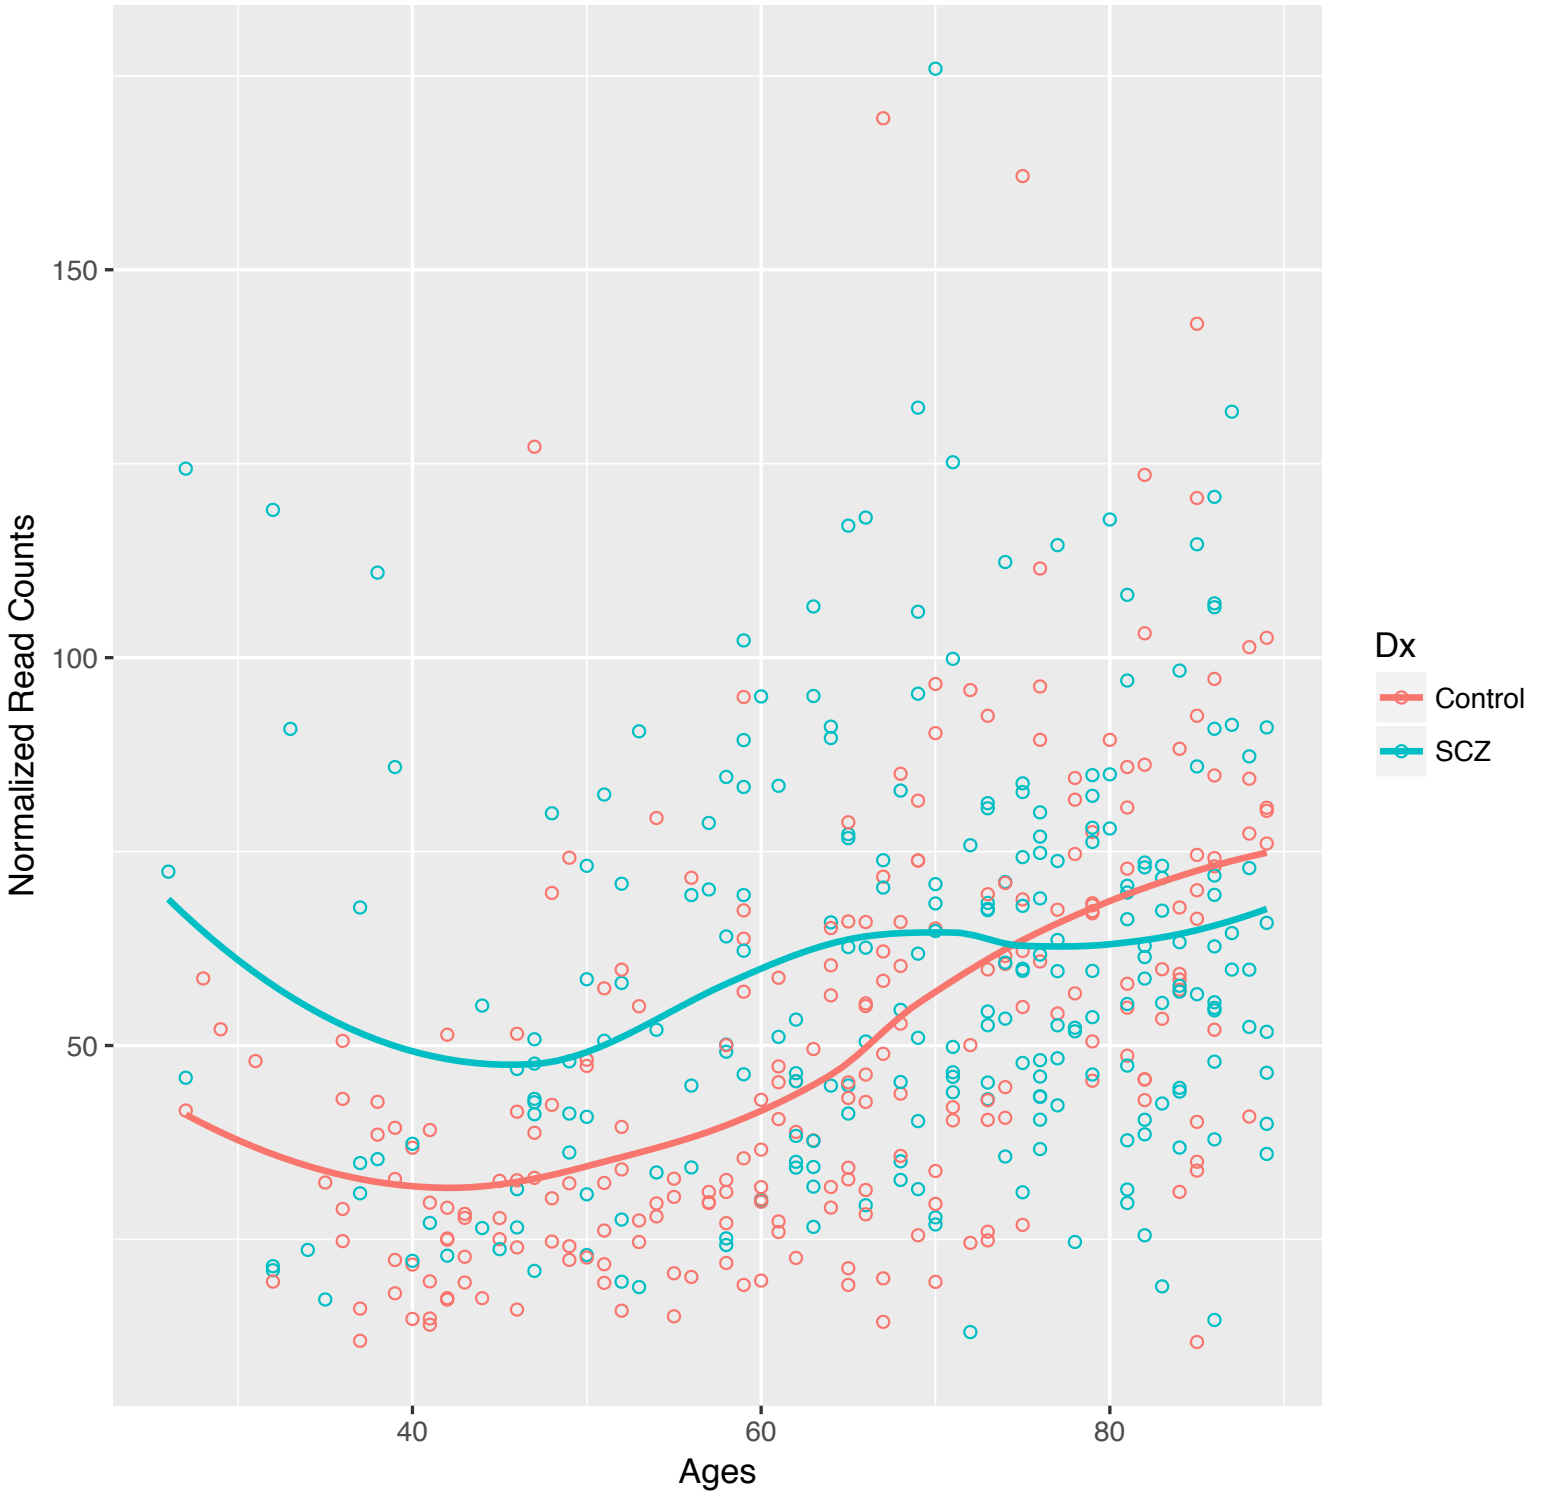

# C2CD2

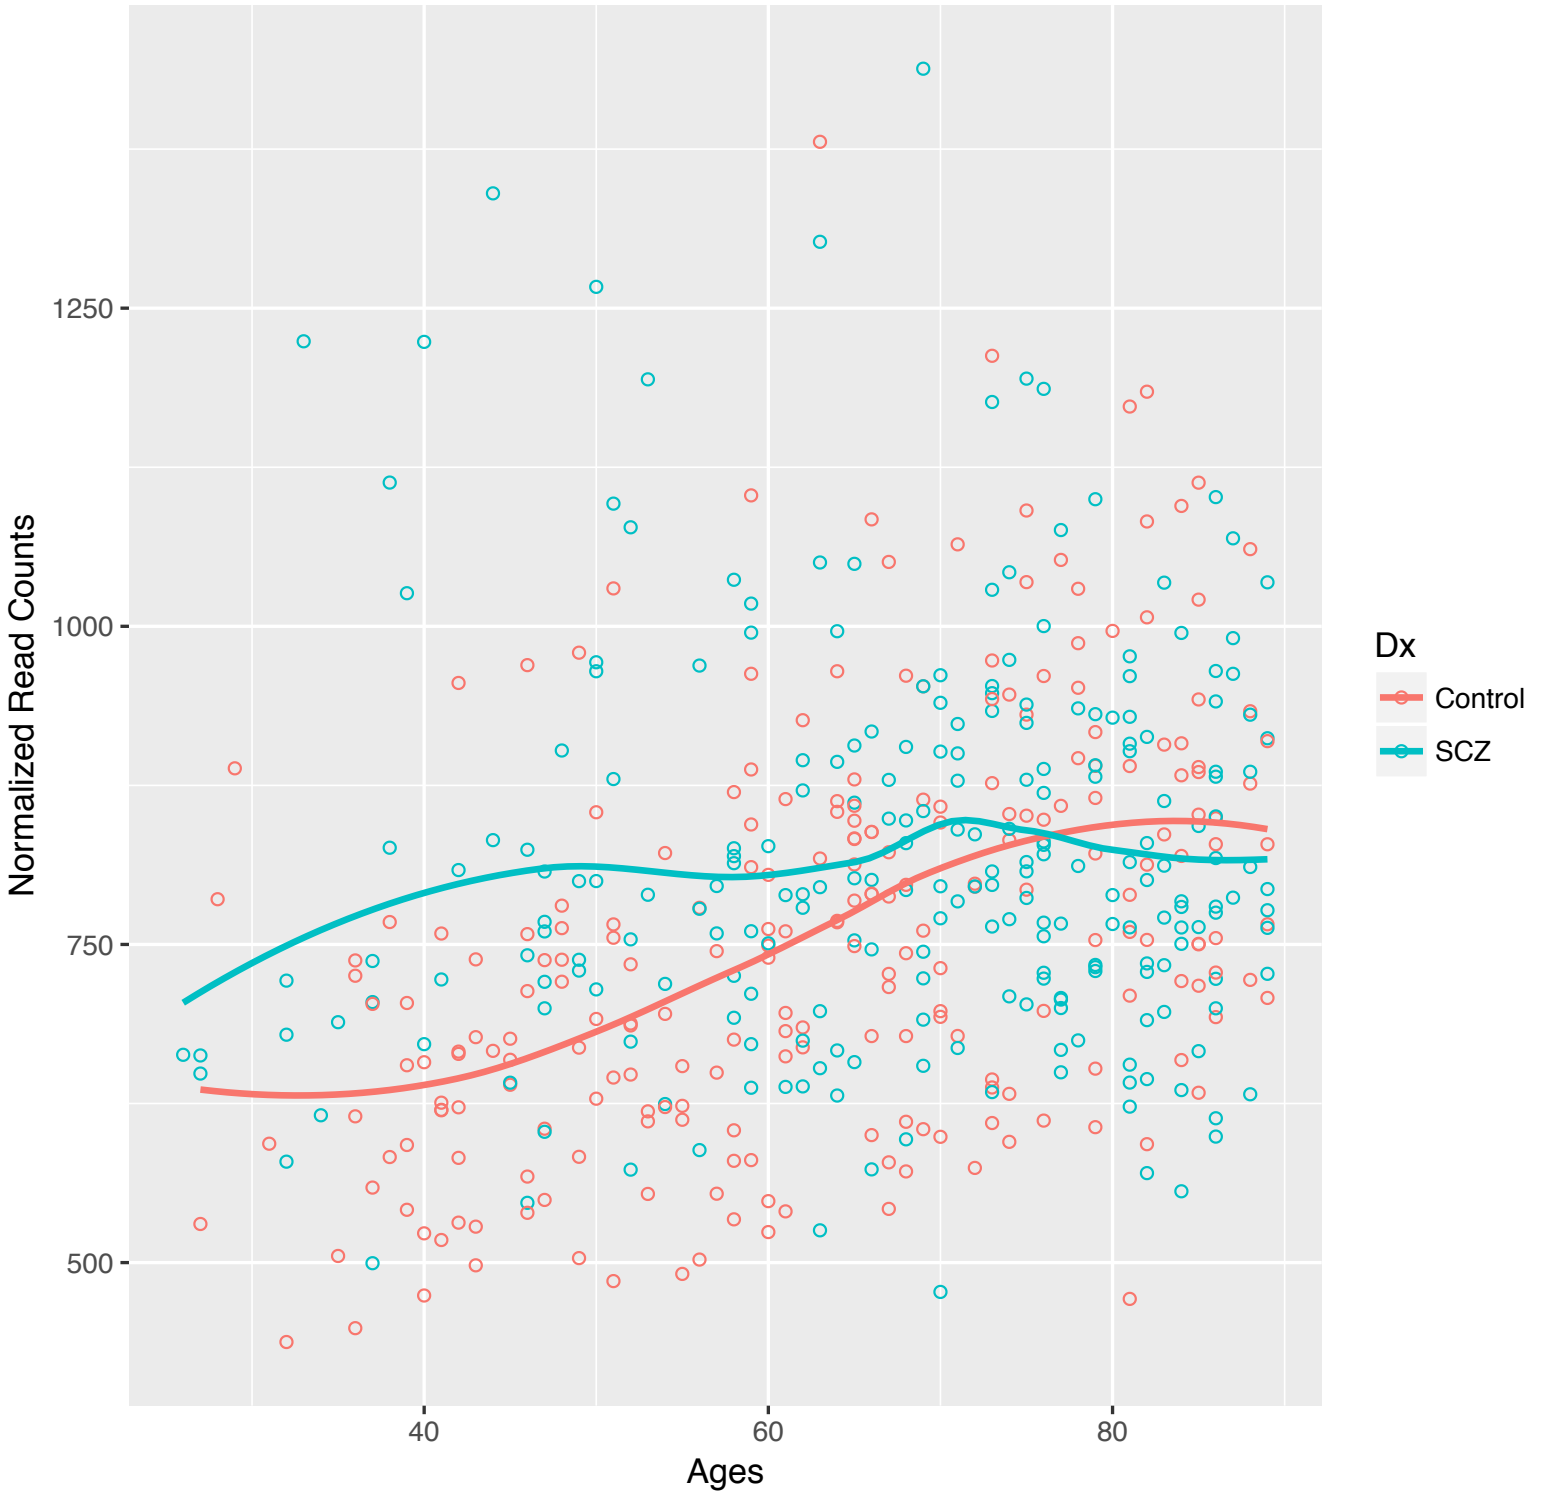

# UROS

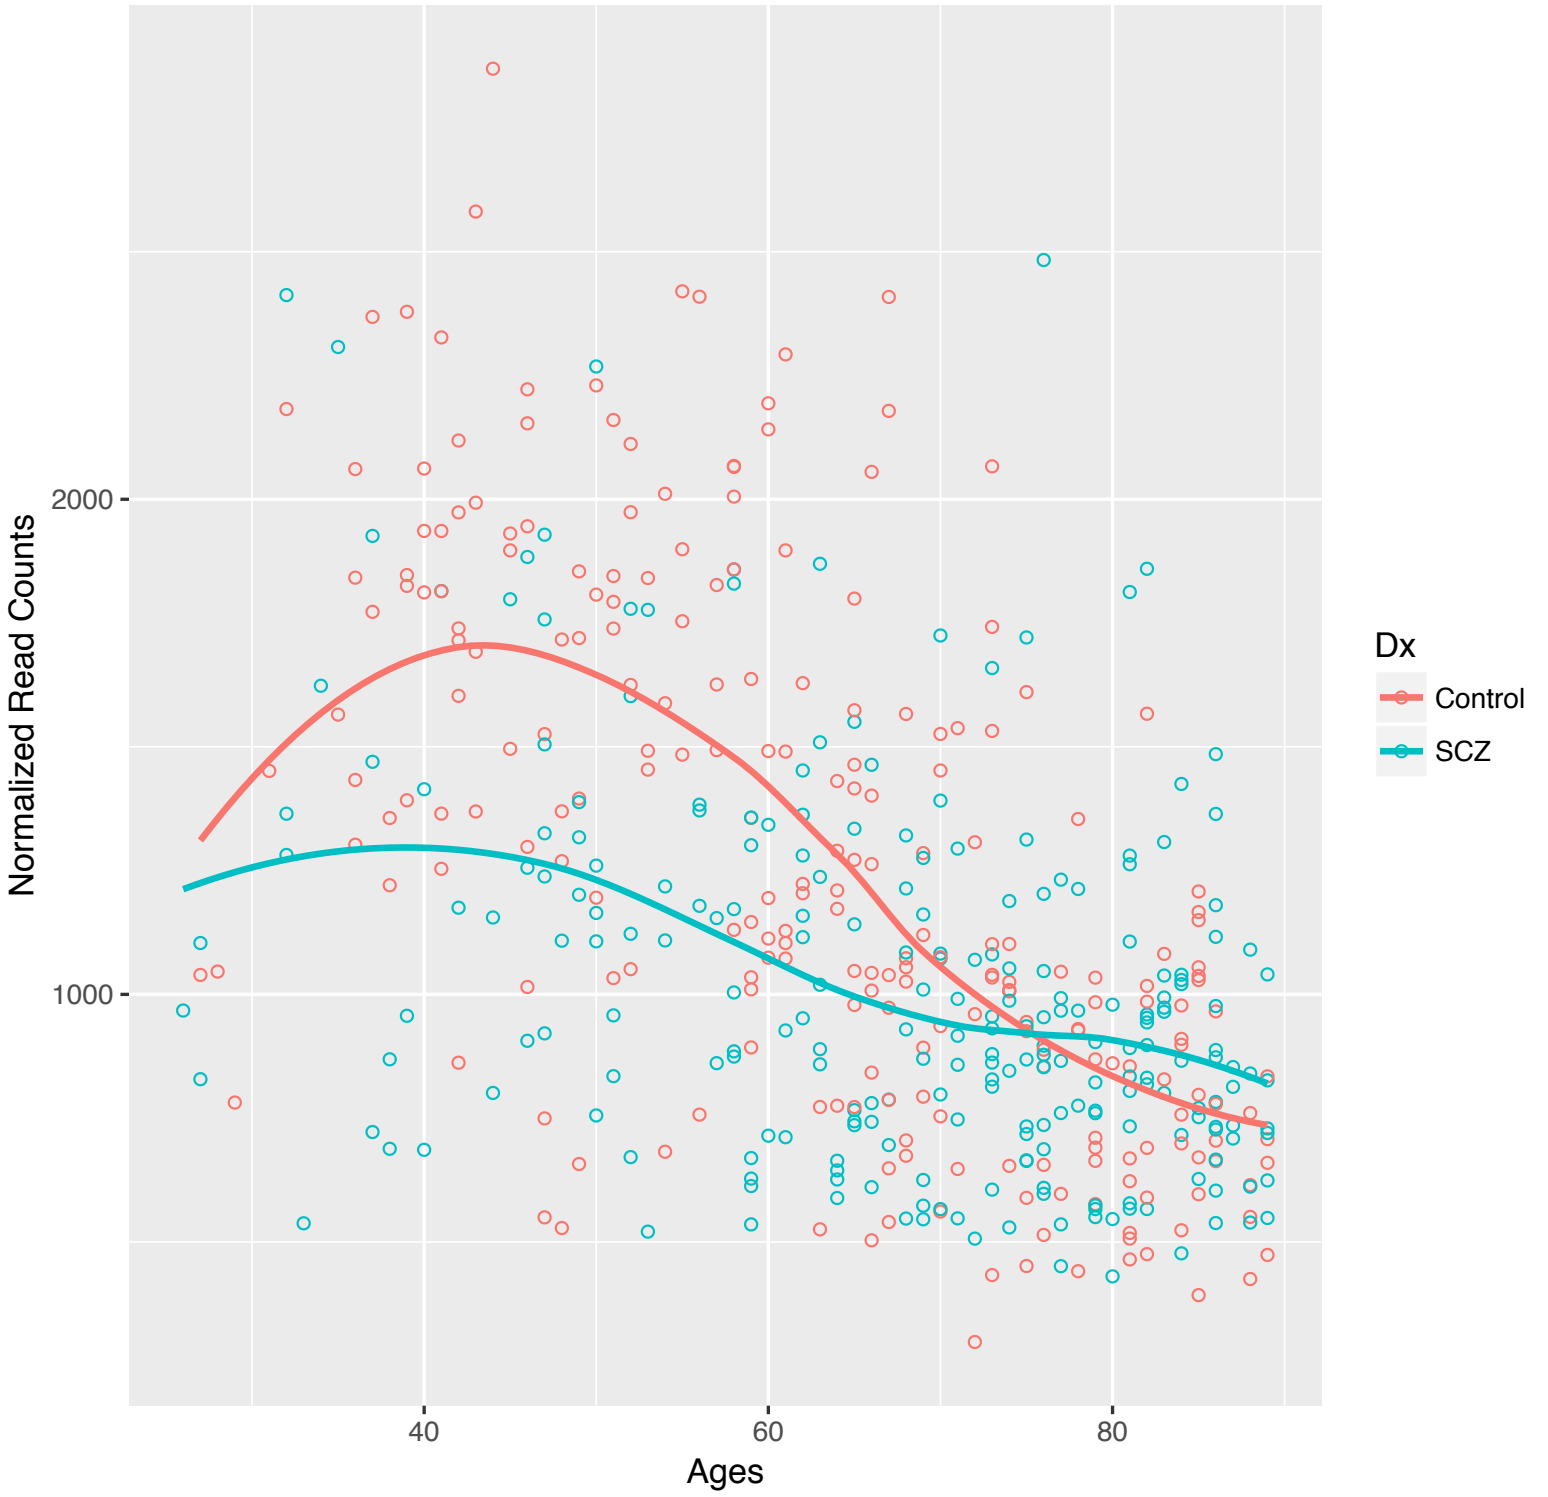

# TGM2

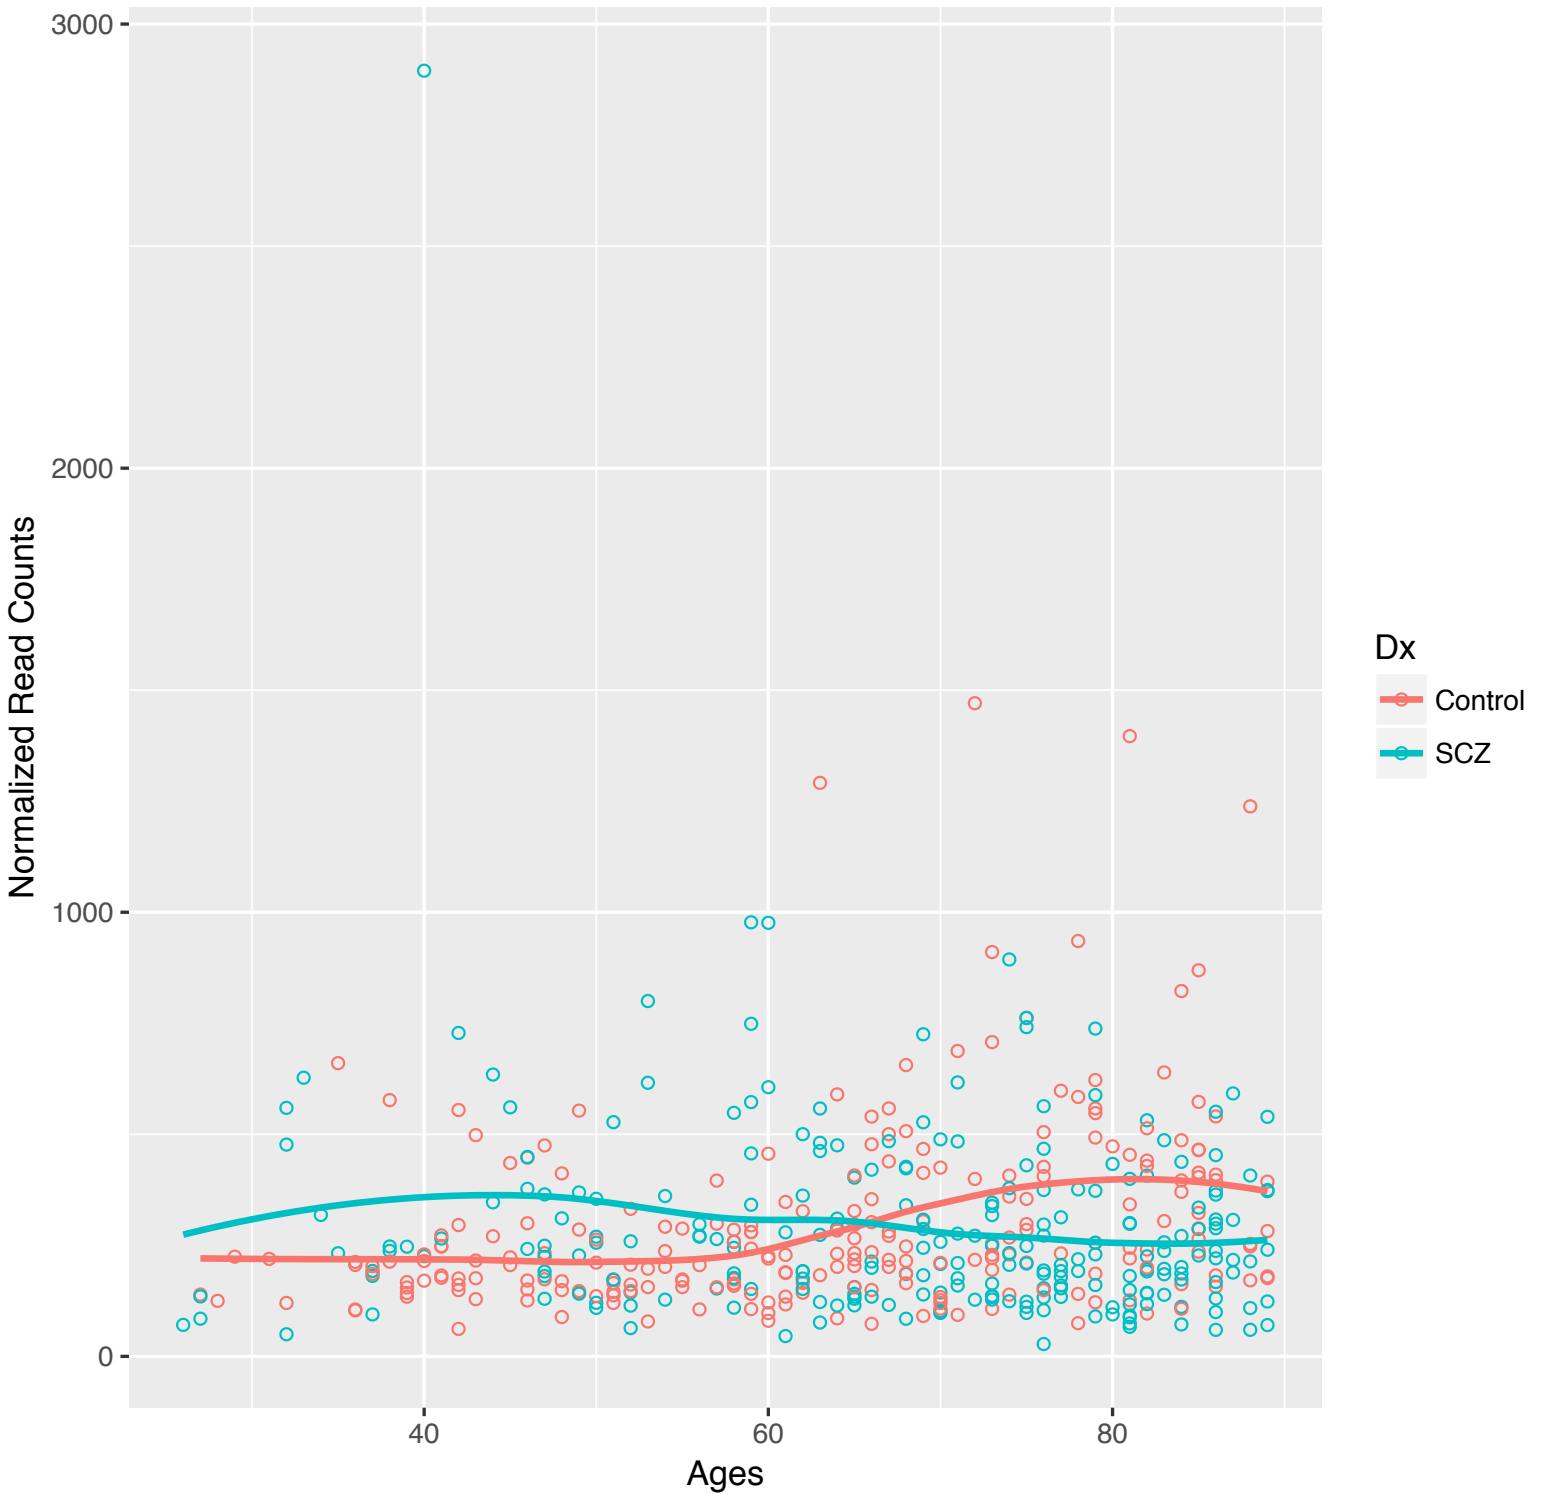

# LINC00513

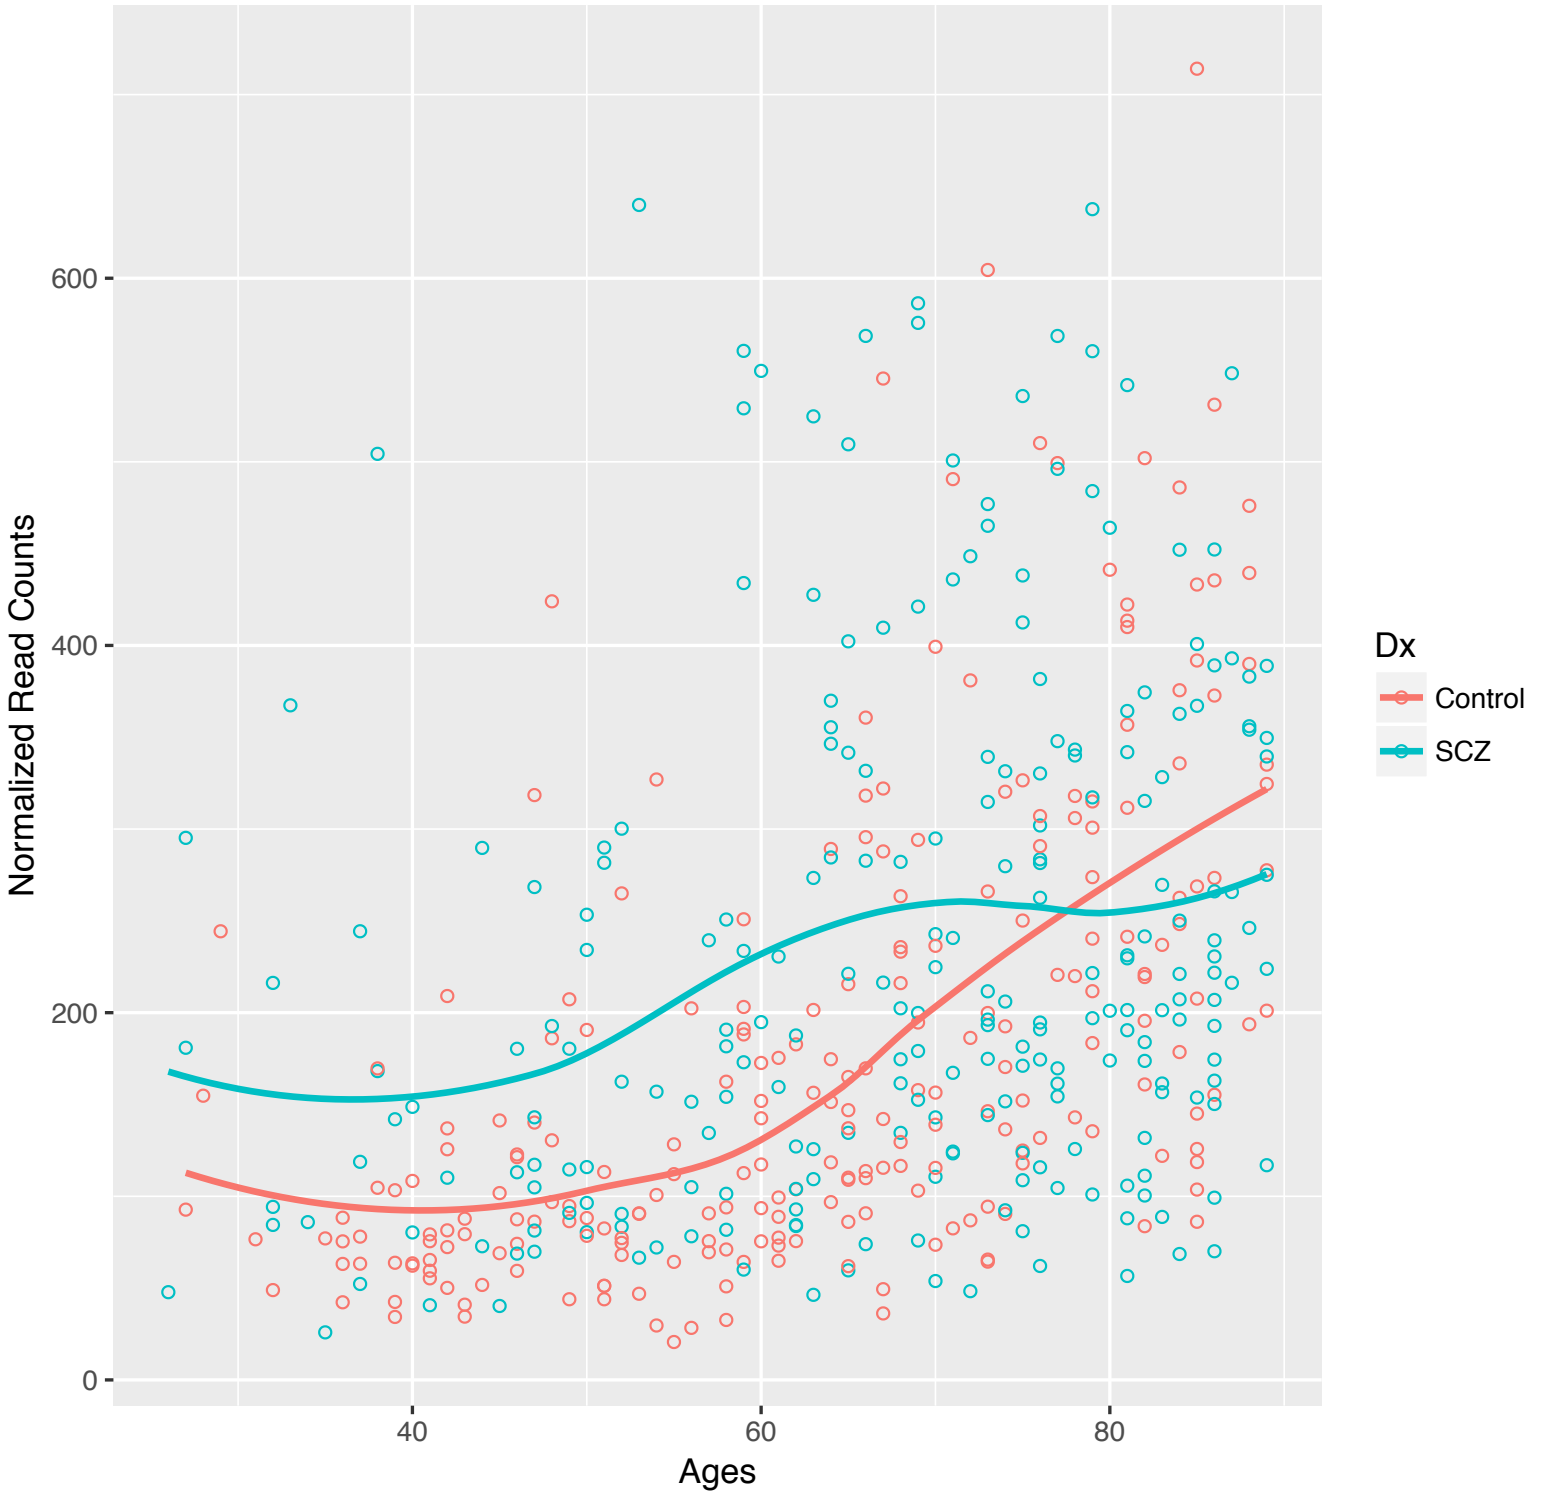

# CBLB

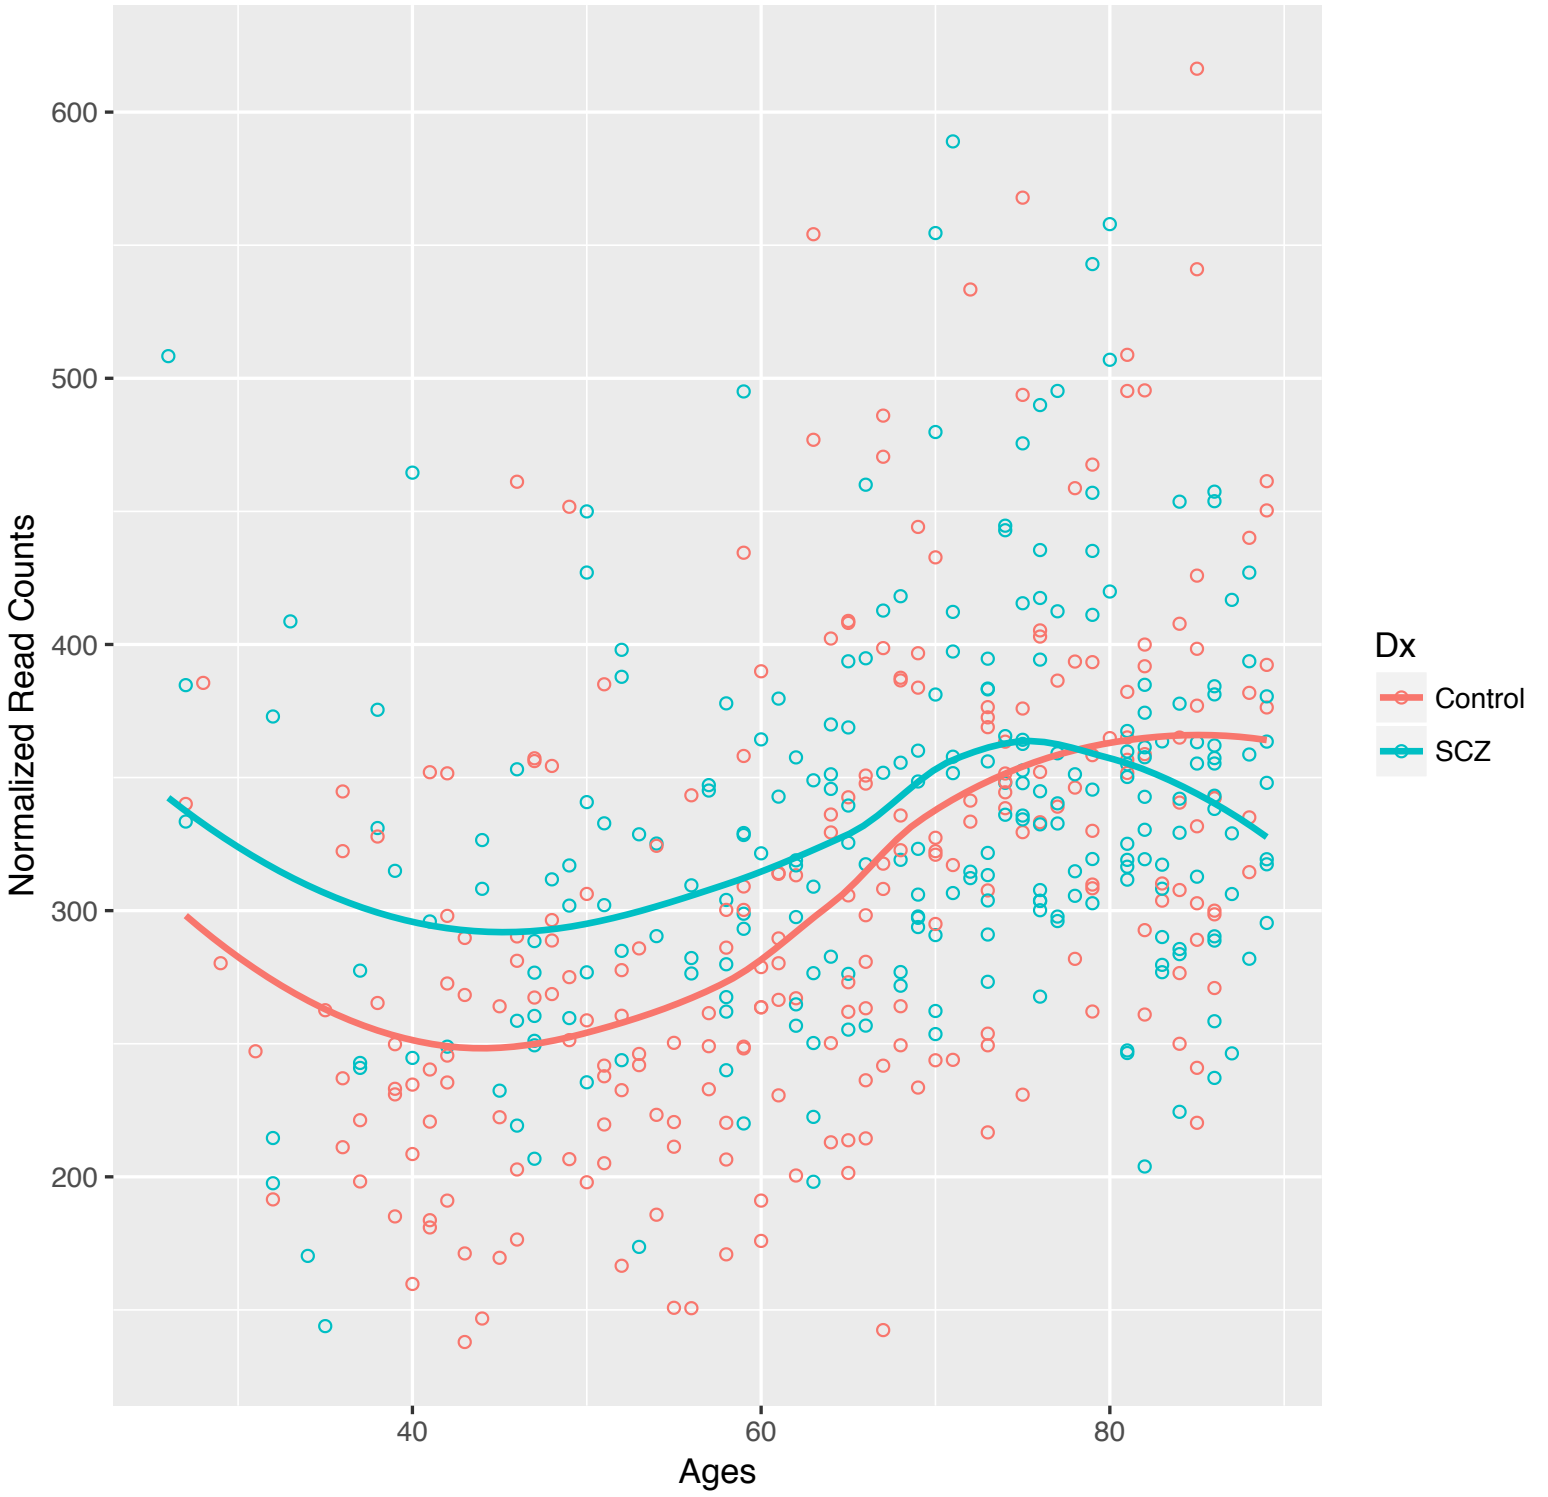



# CSPG4P12

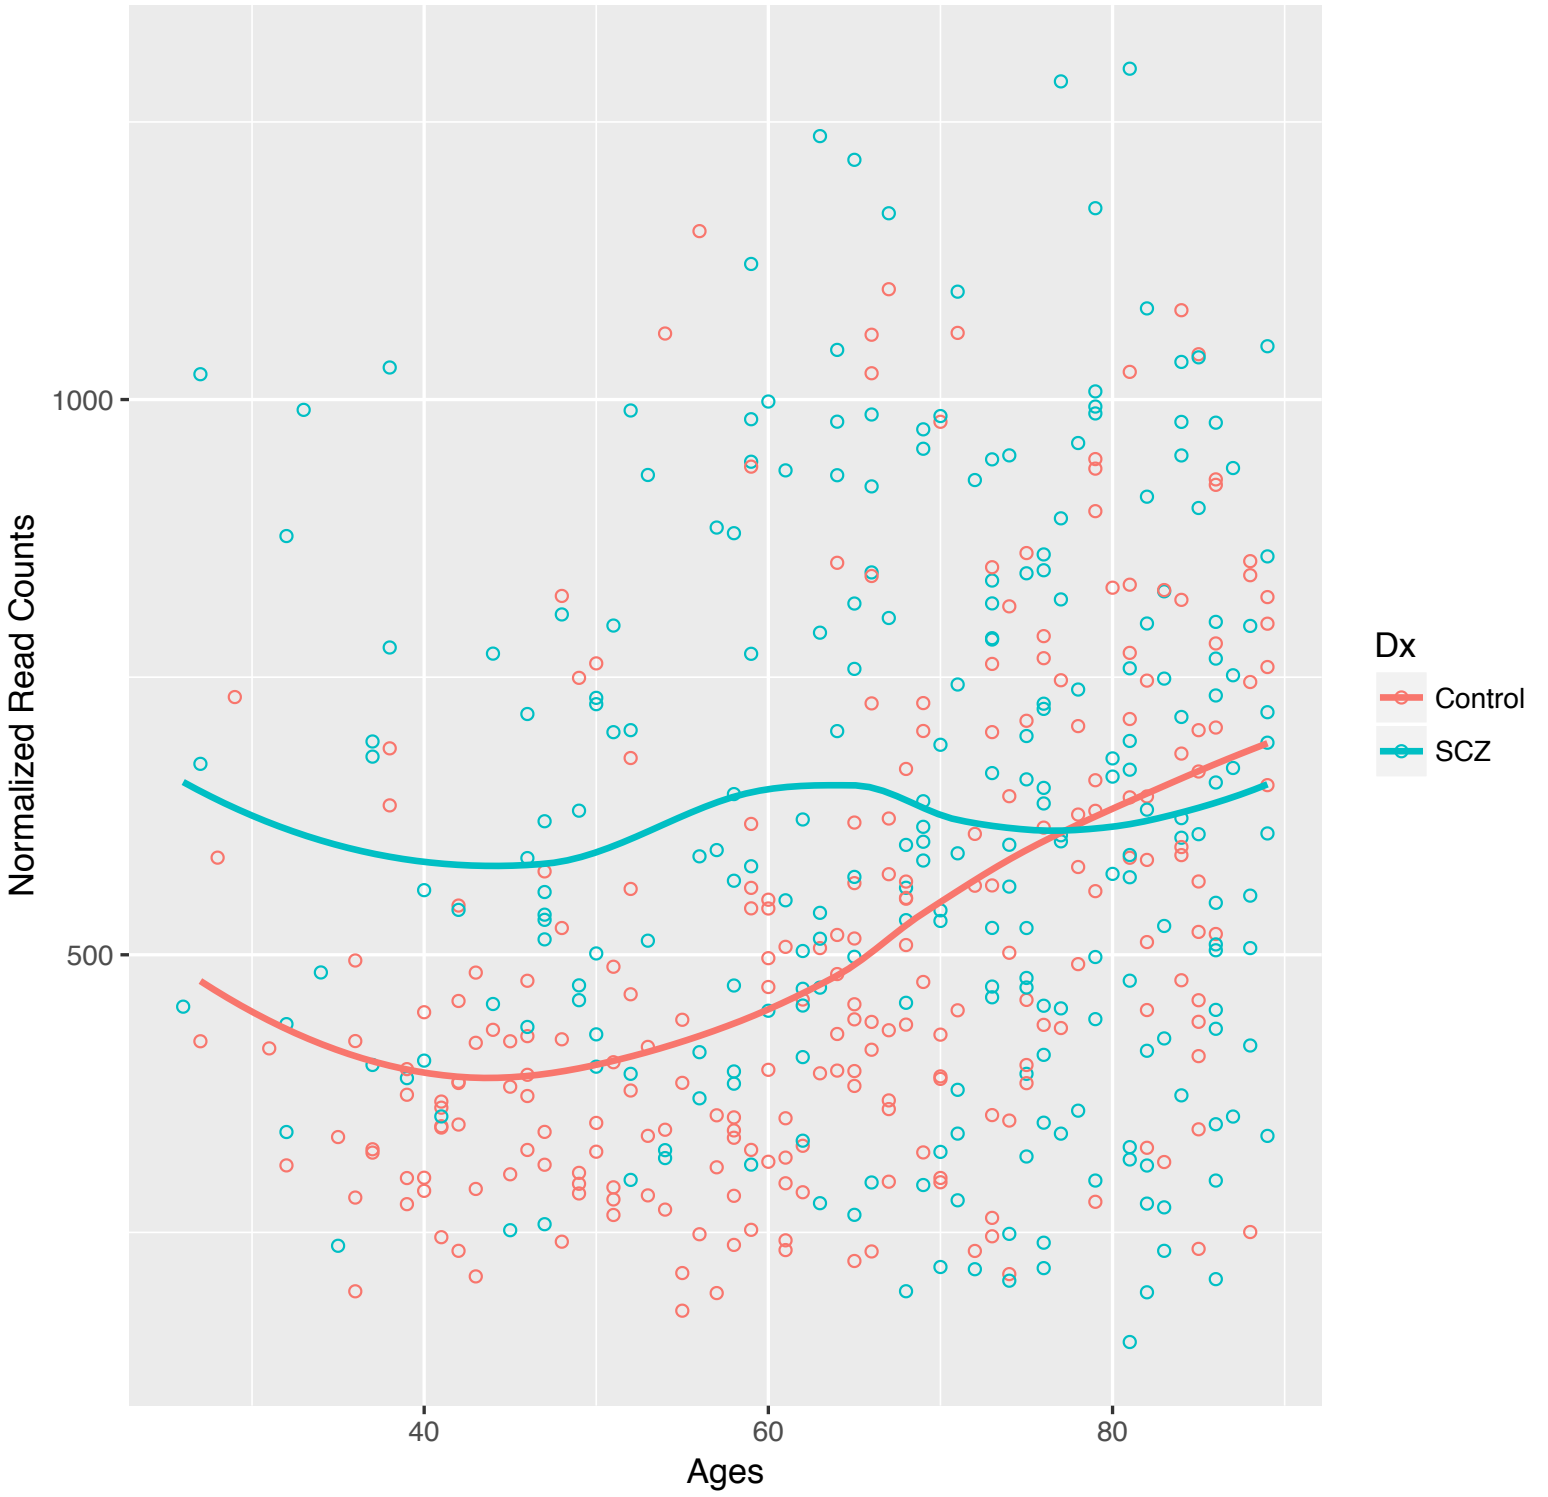

# FAM95B1

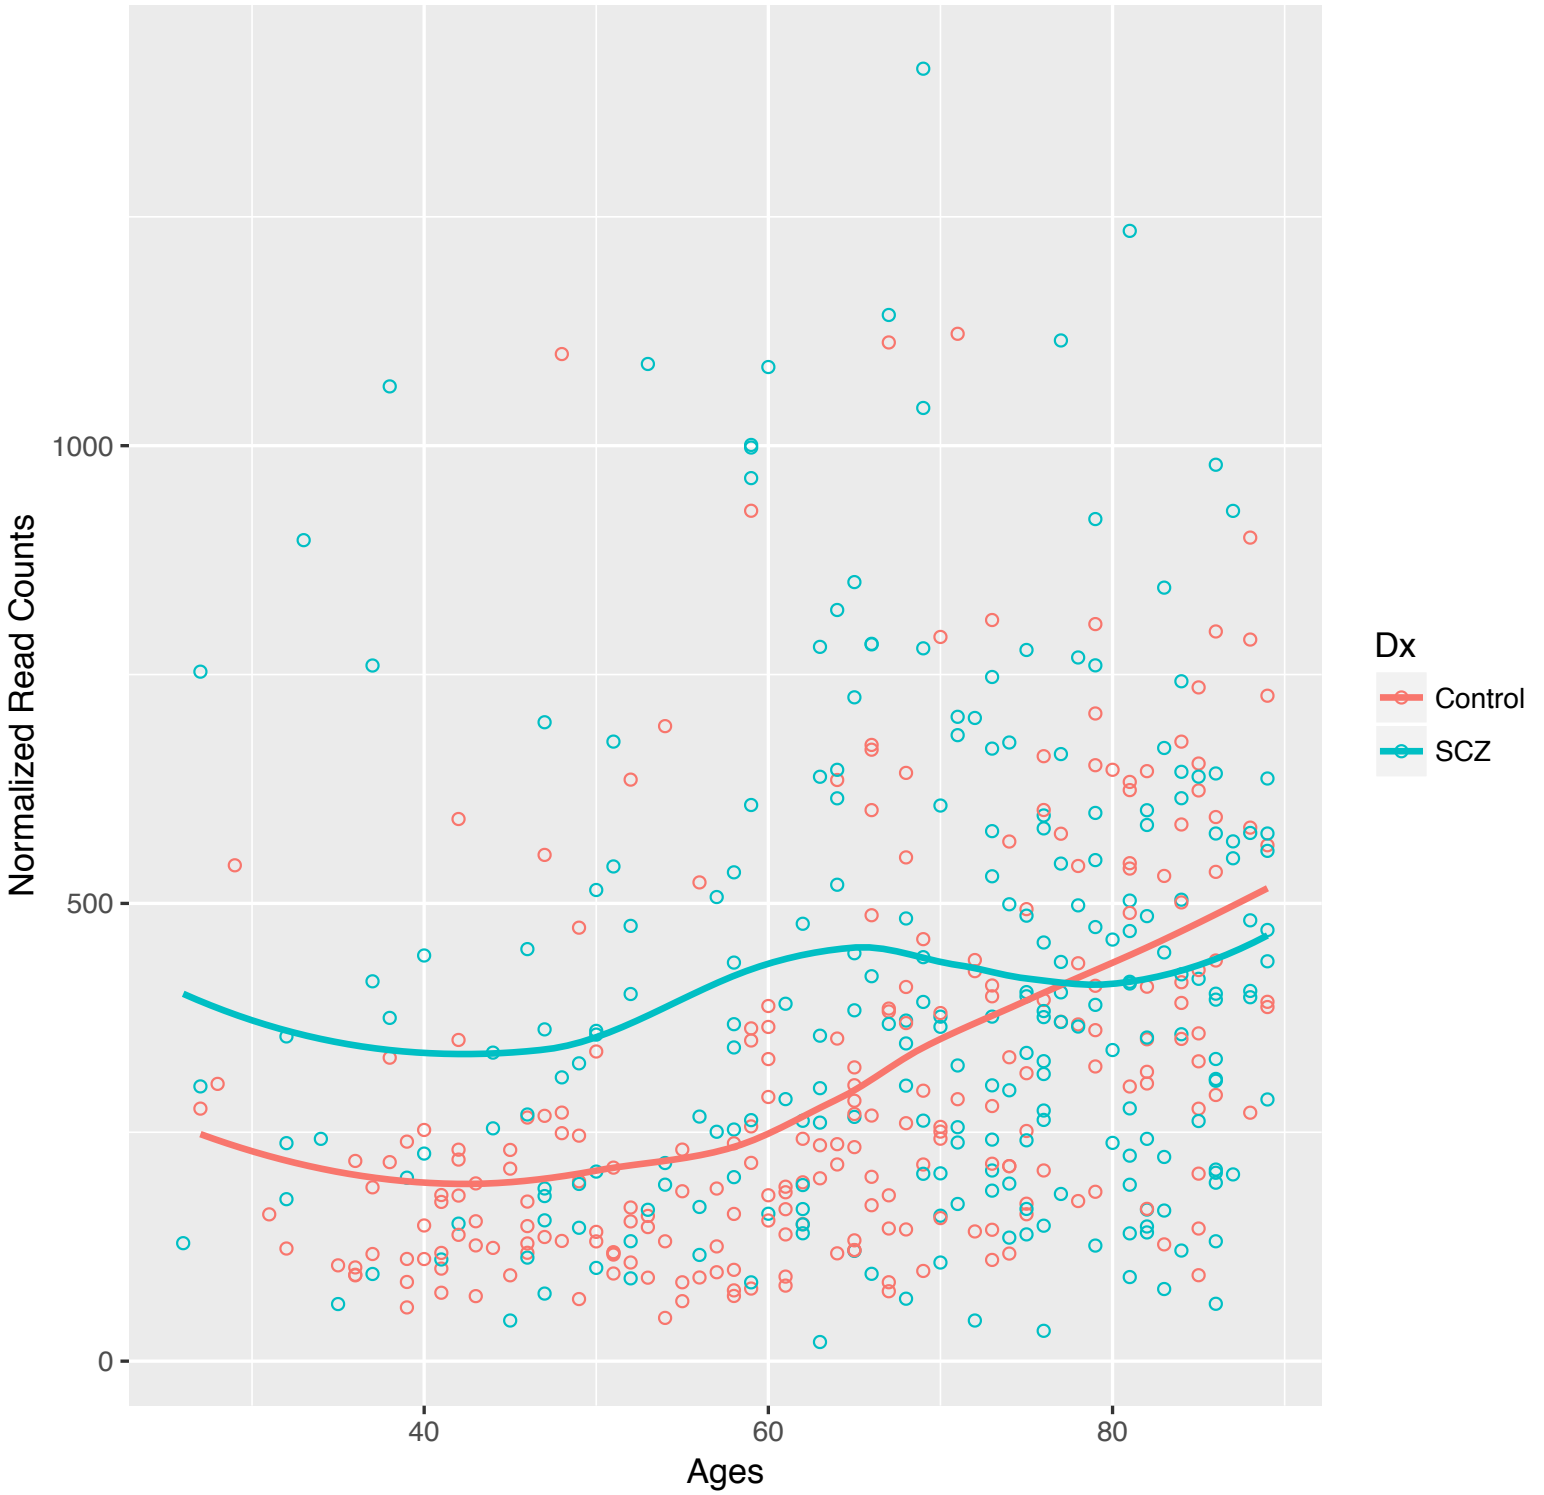

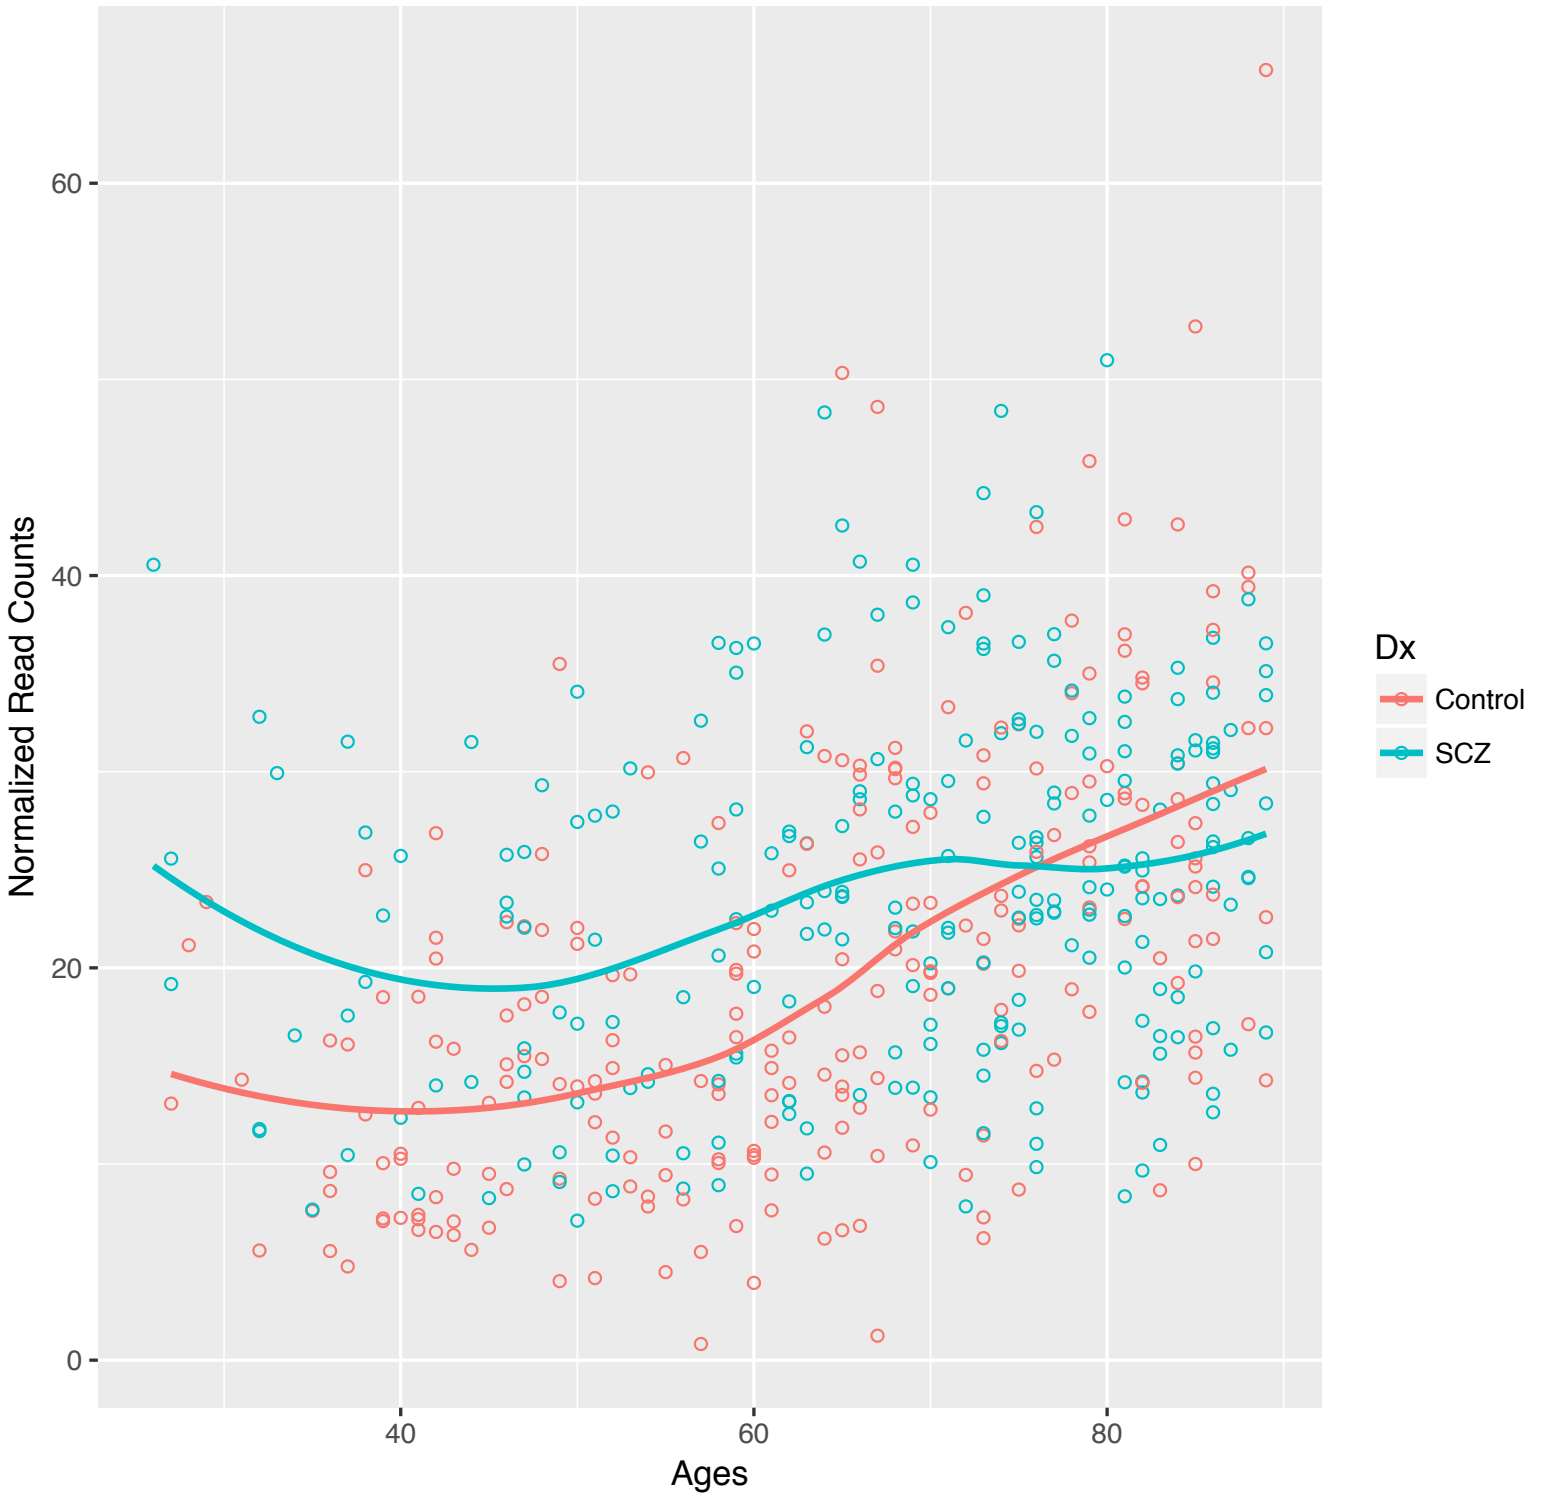

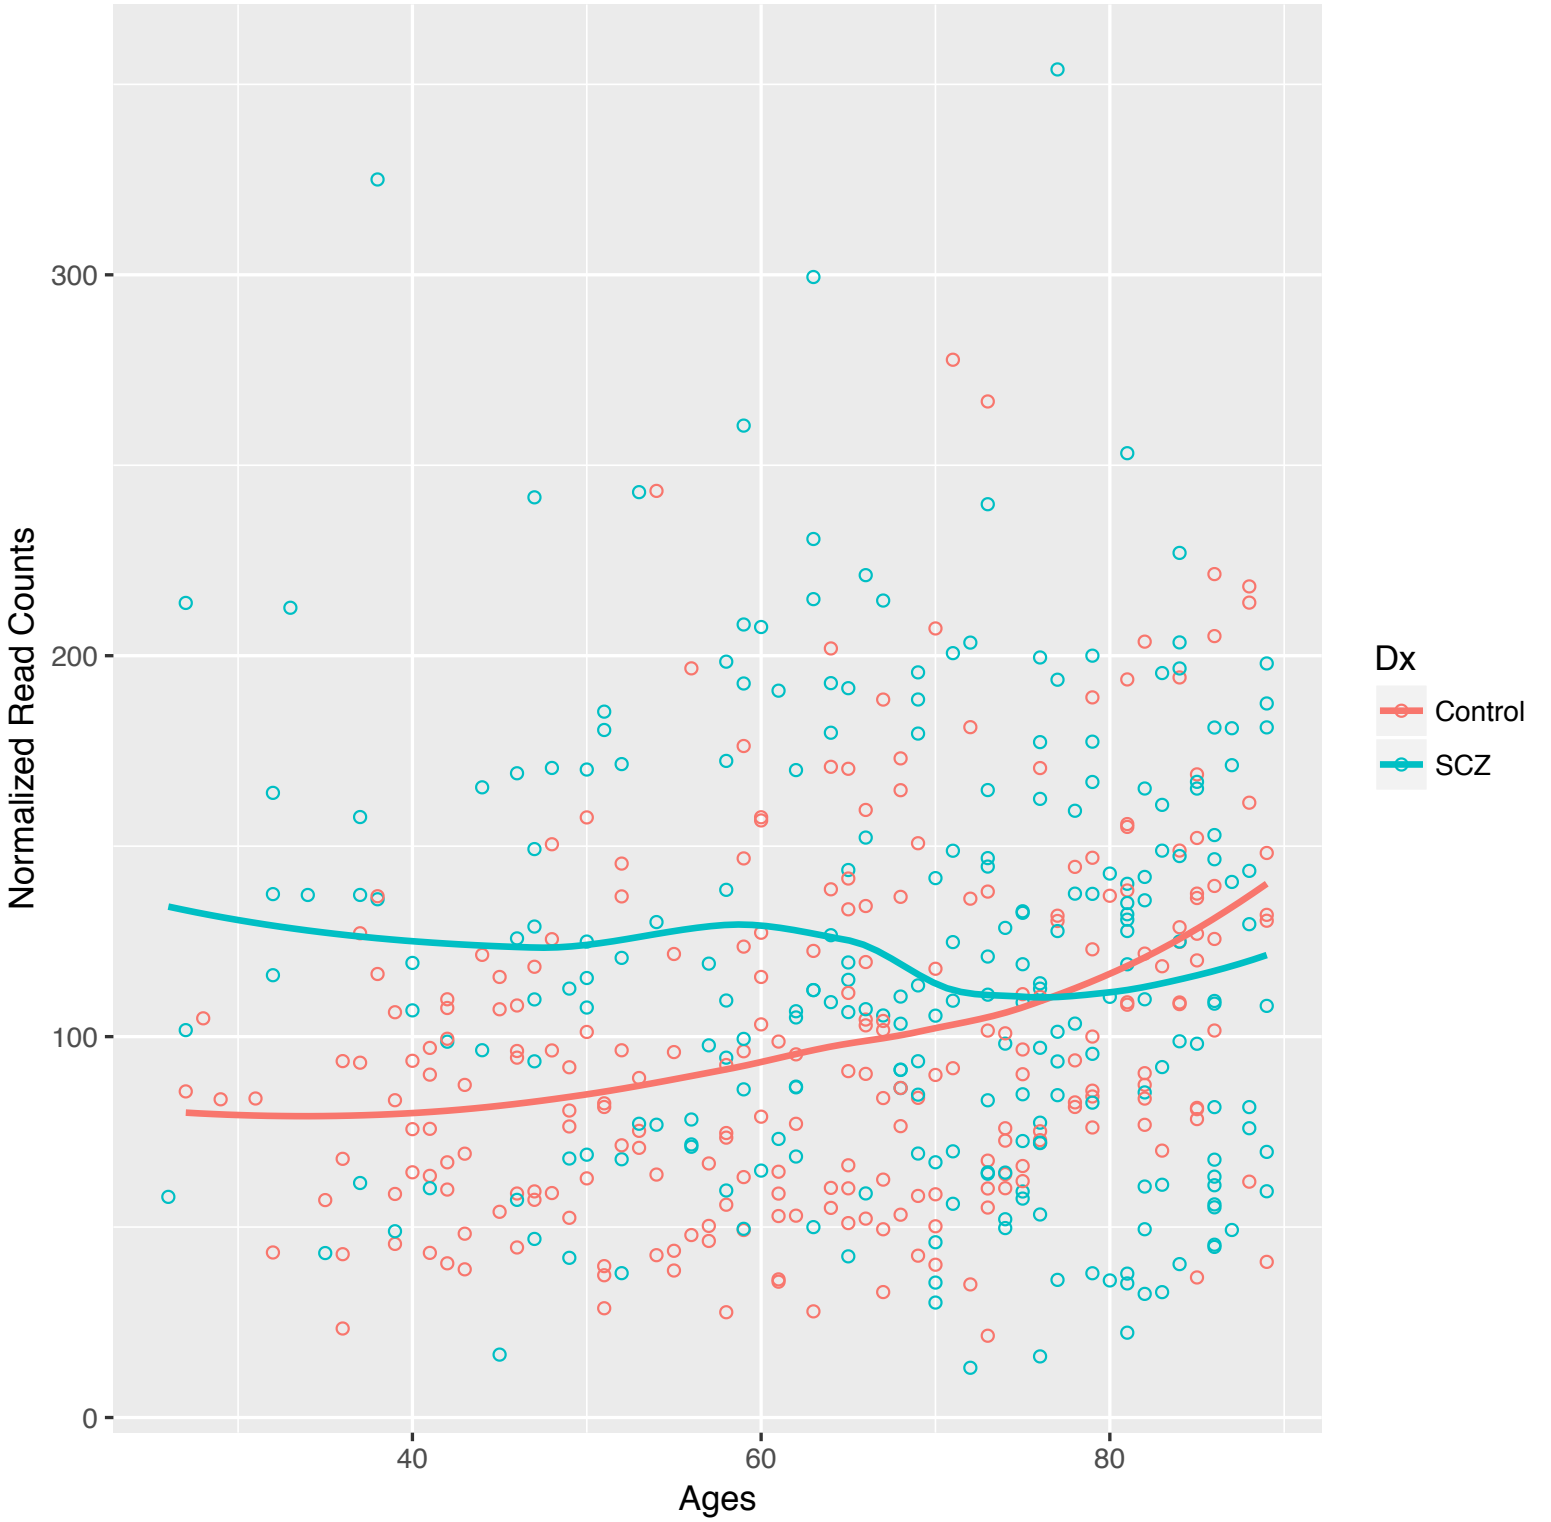

# NDUFS4

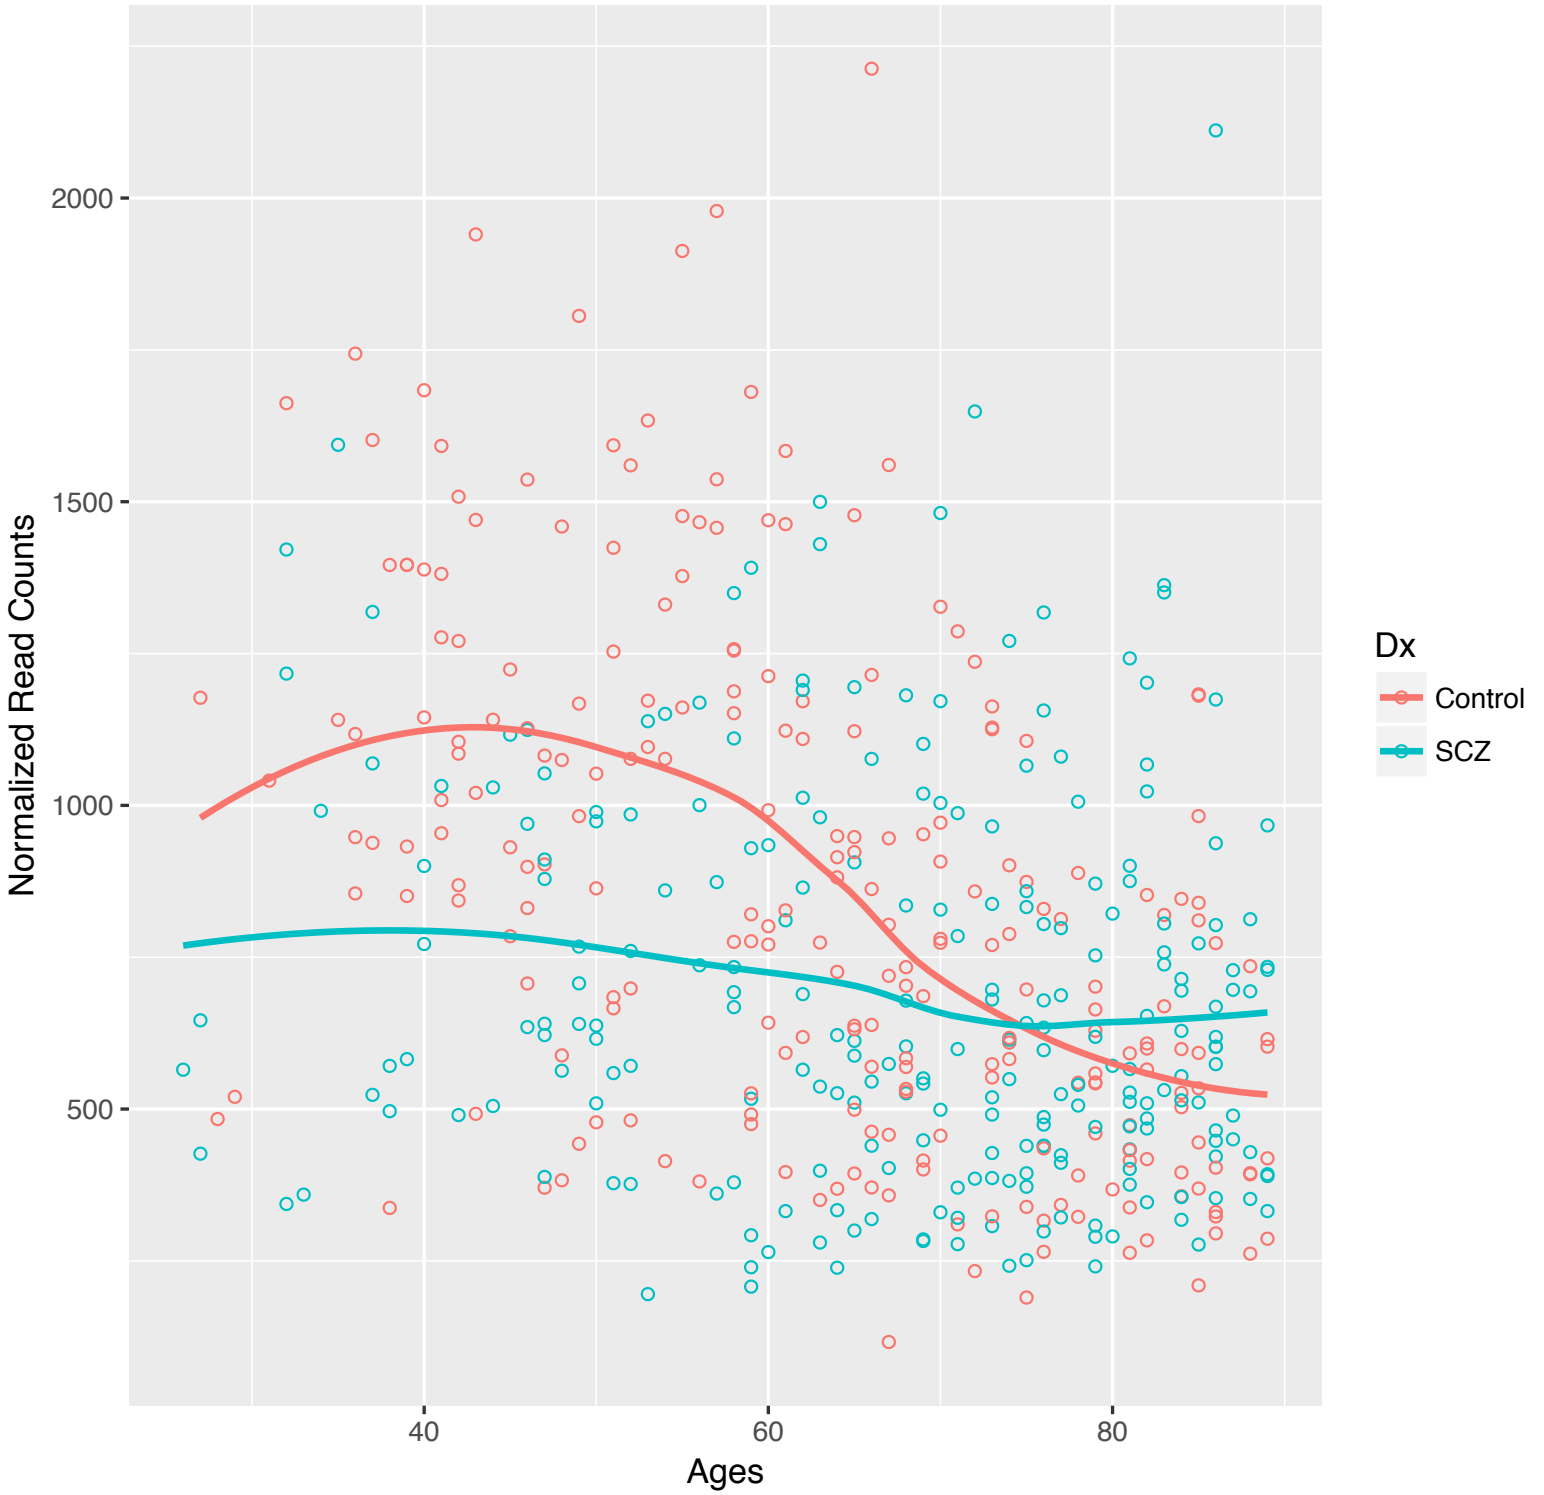

# SPEF1

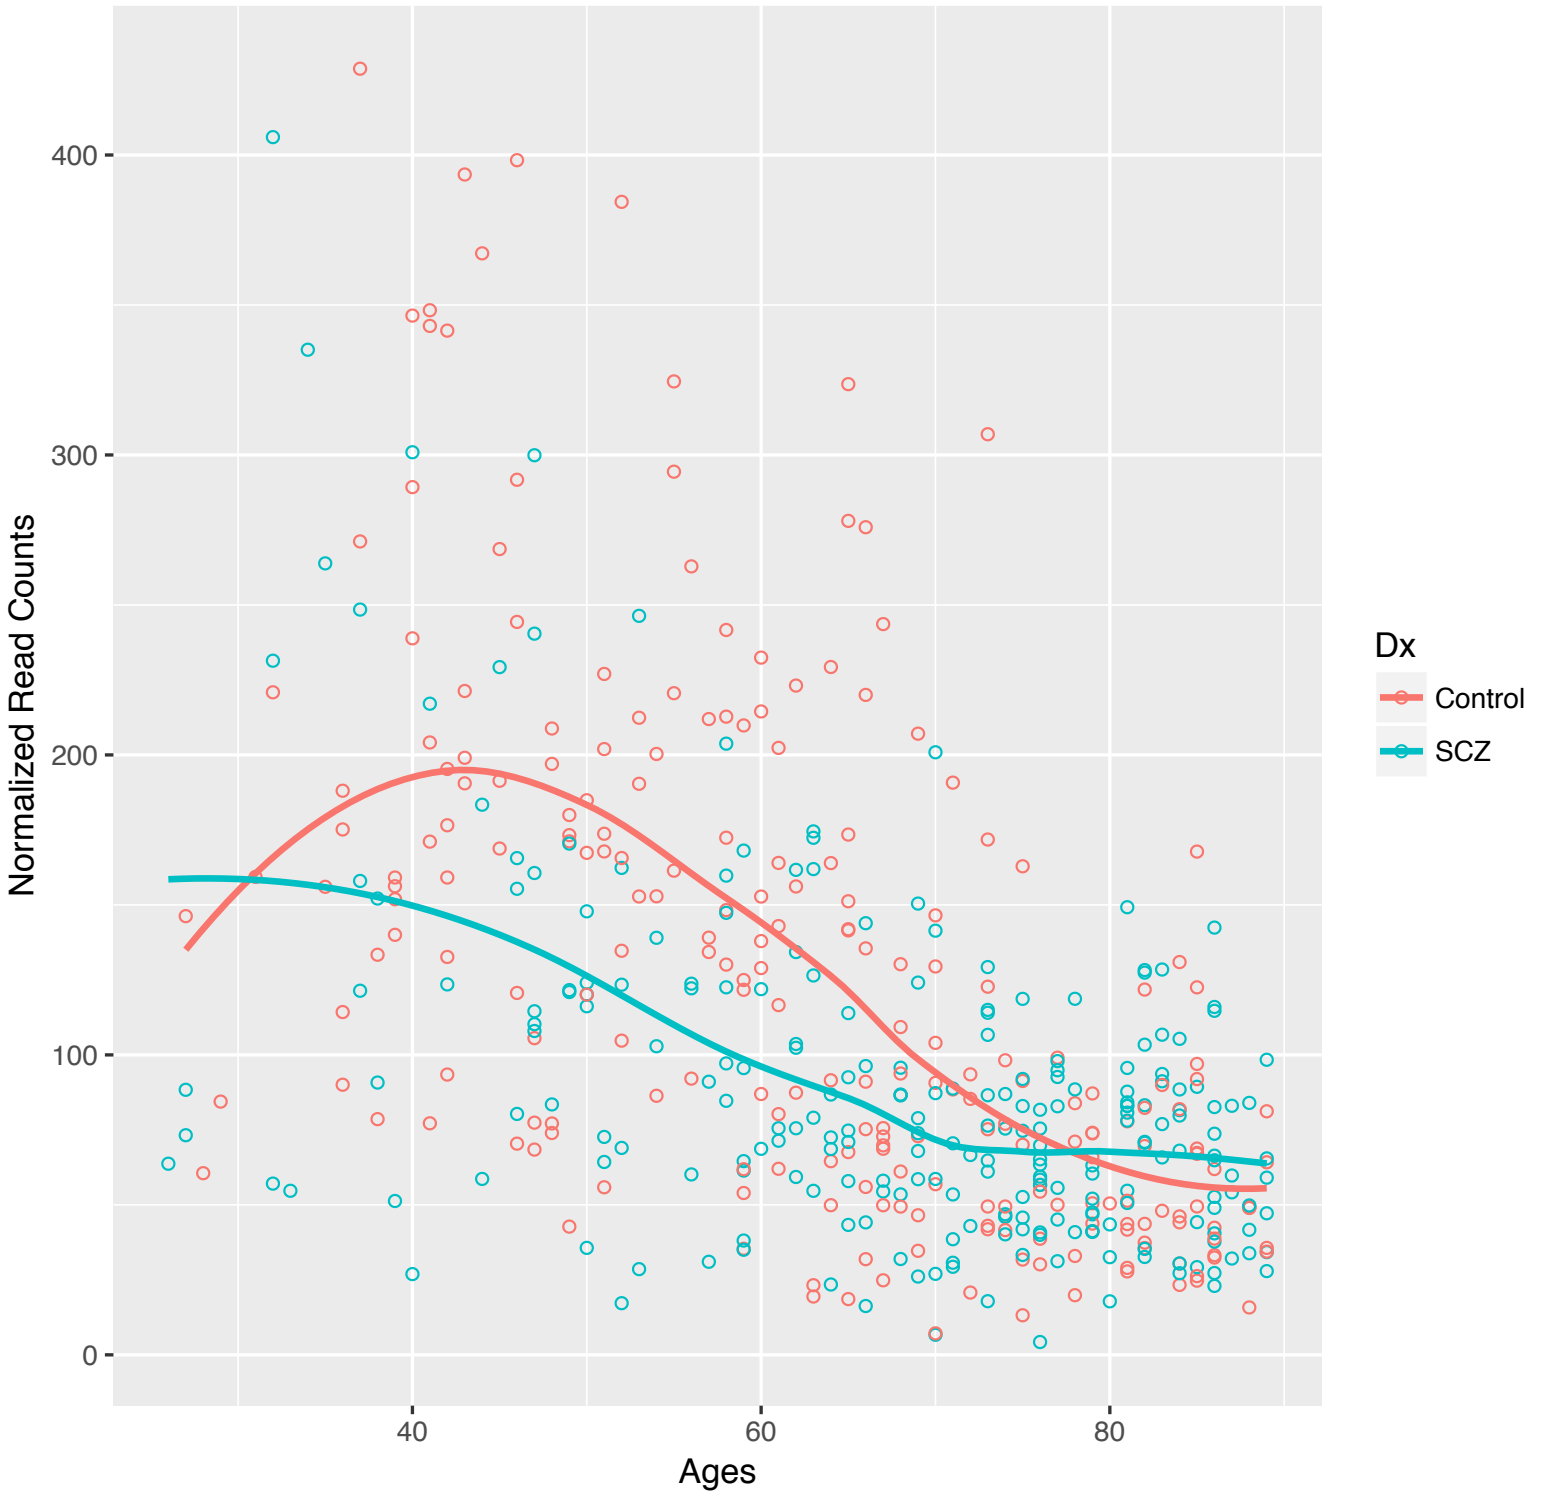

# TMPPE

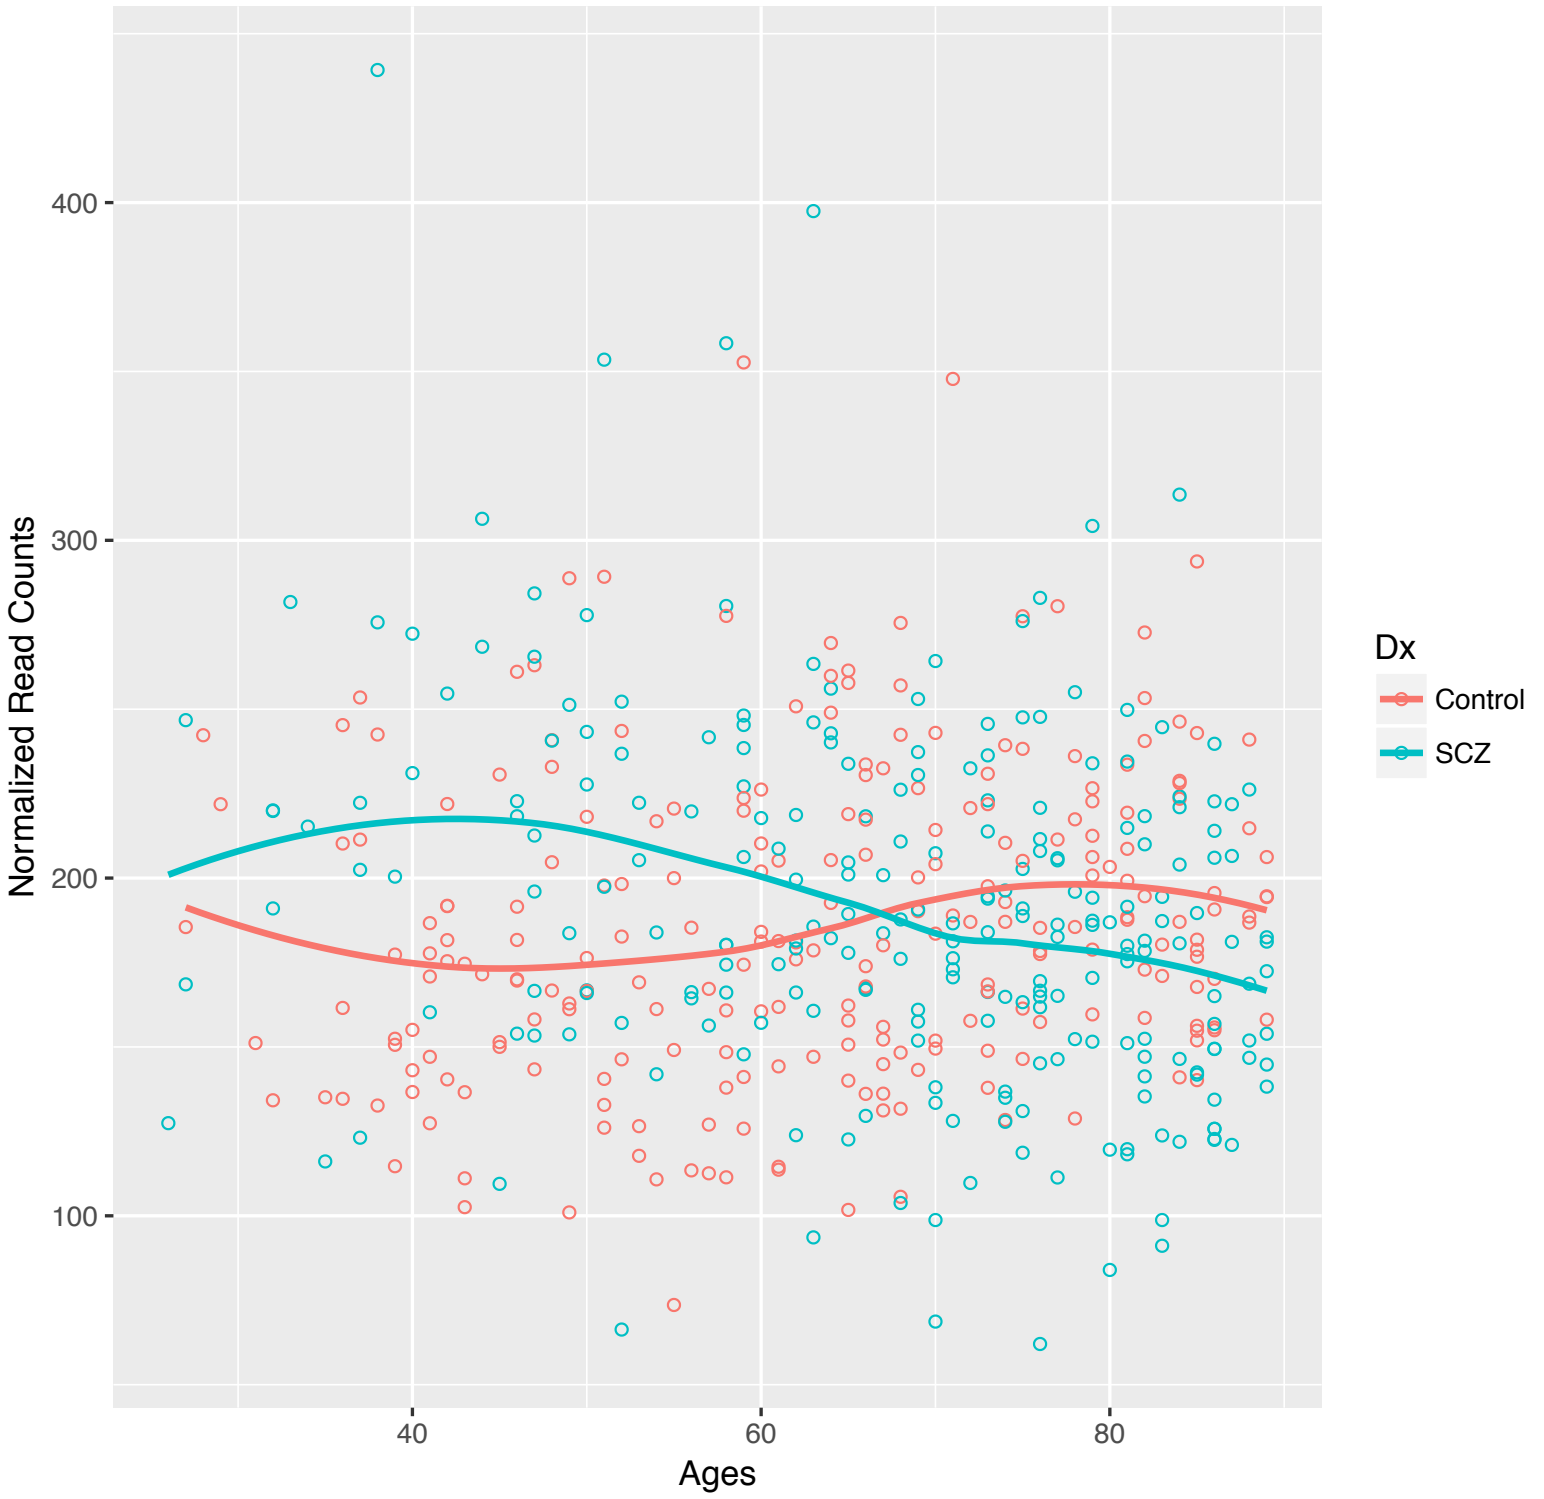

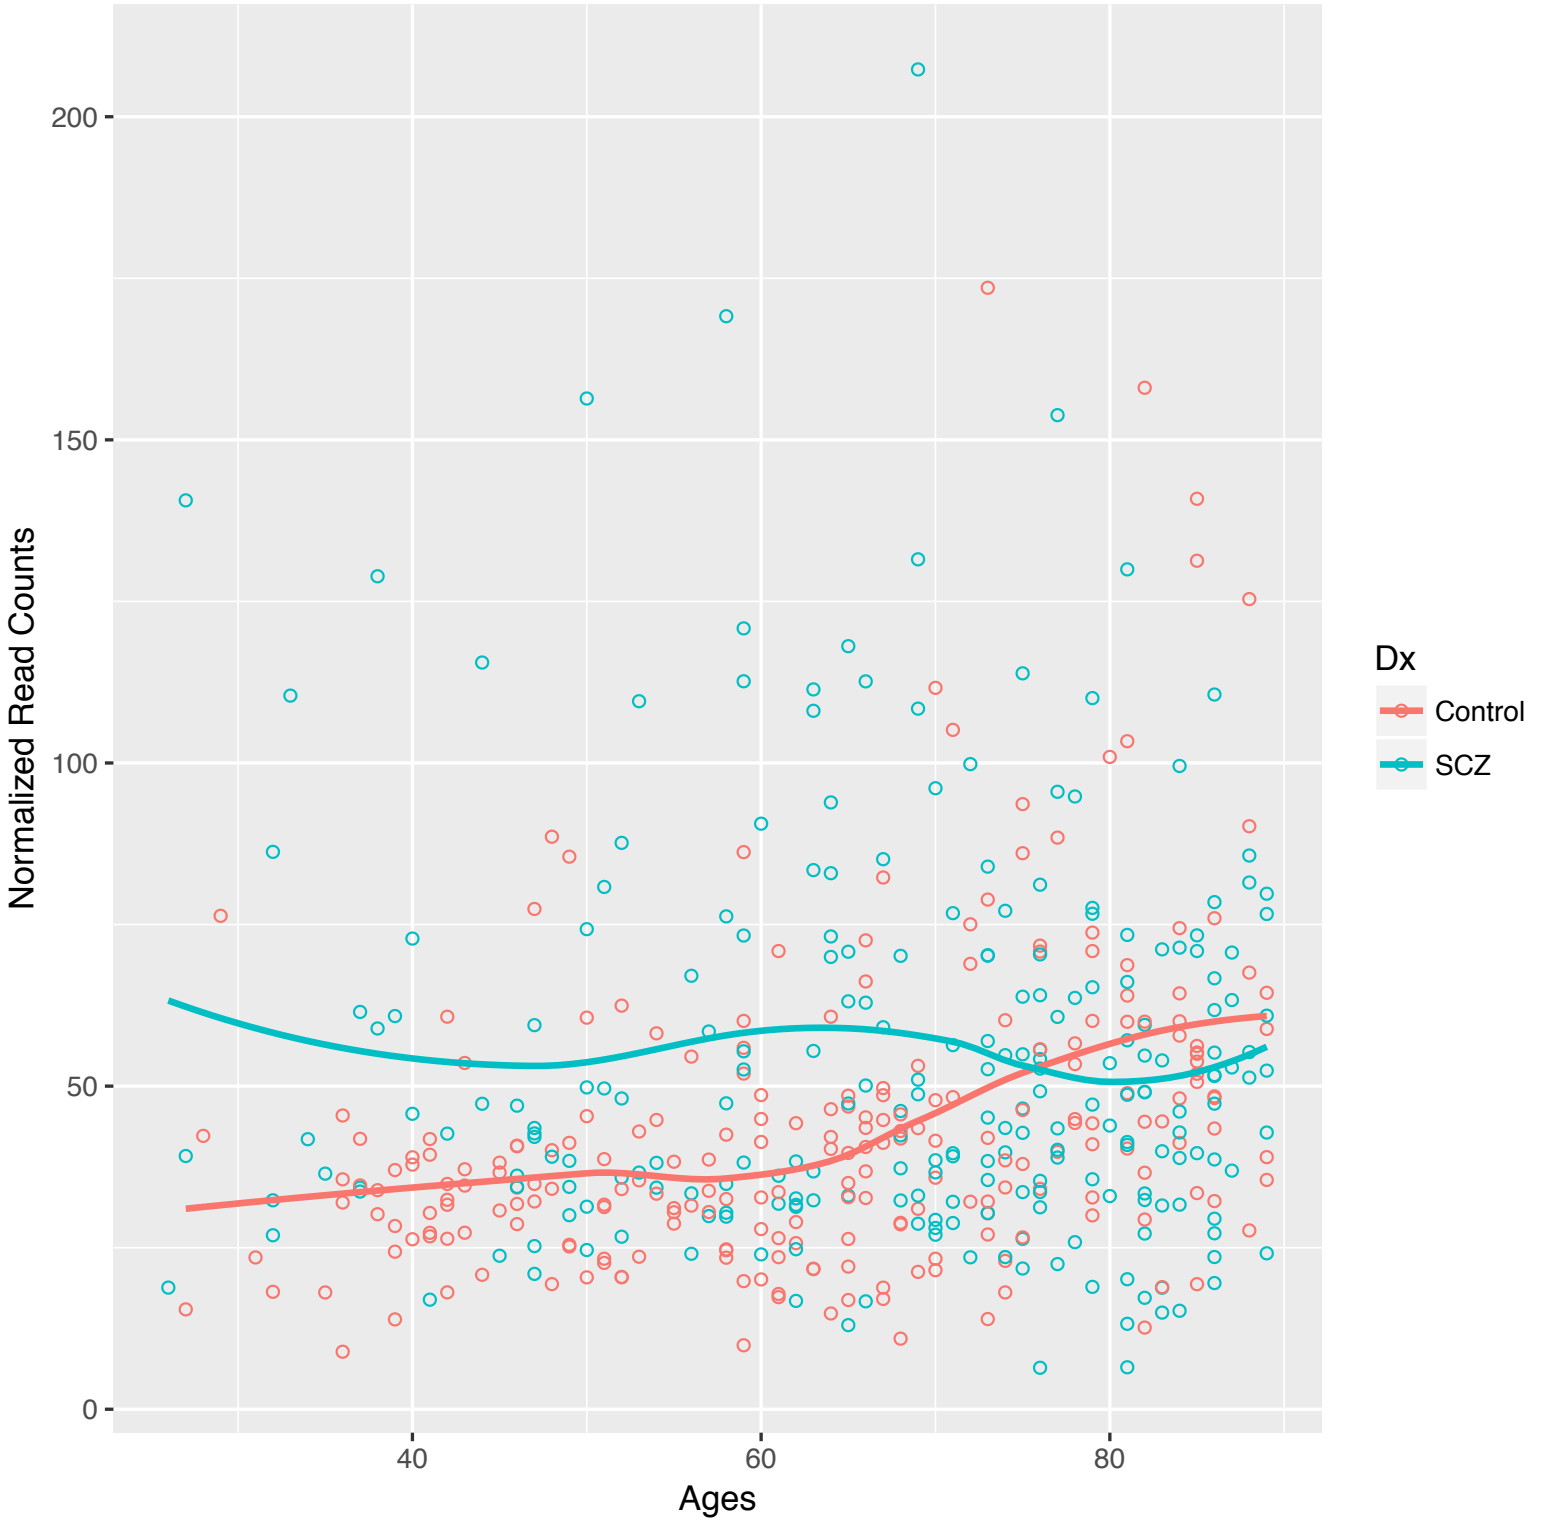



# PLA1A

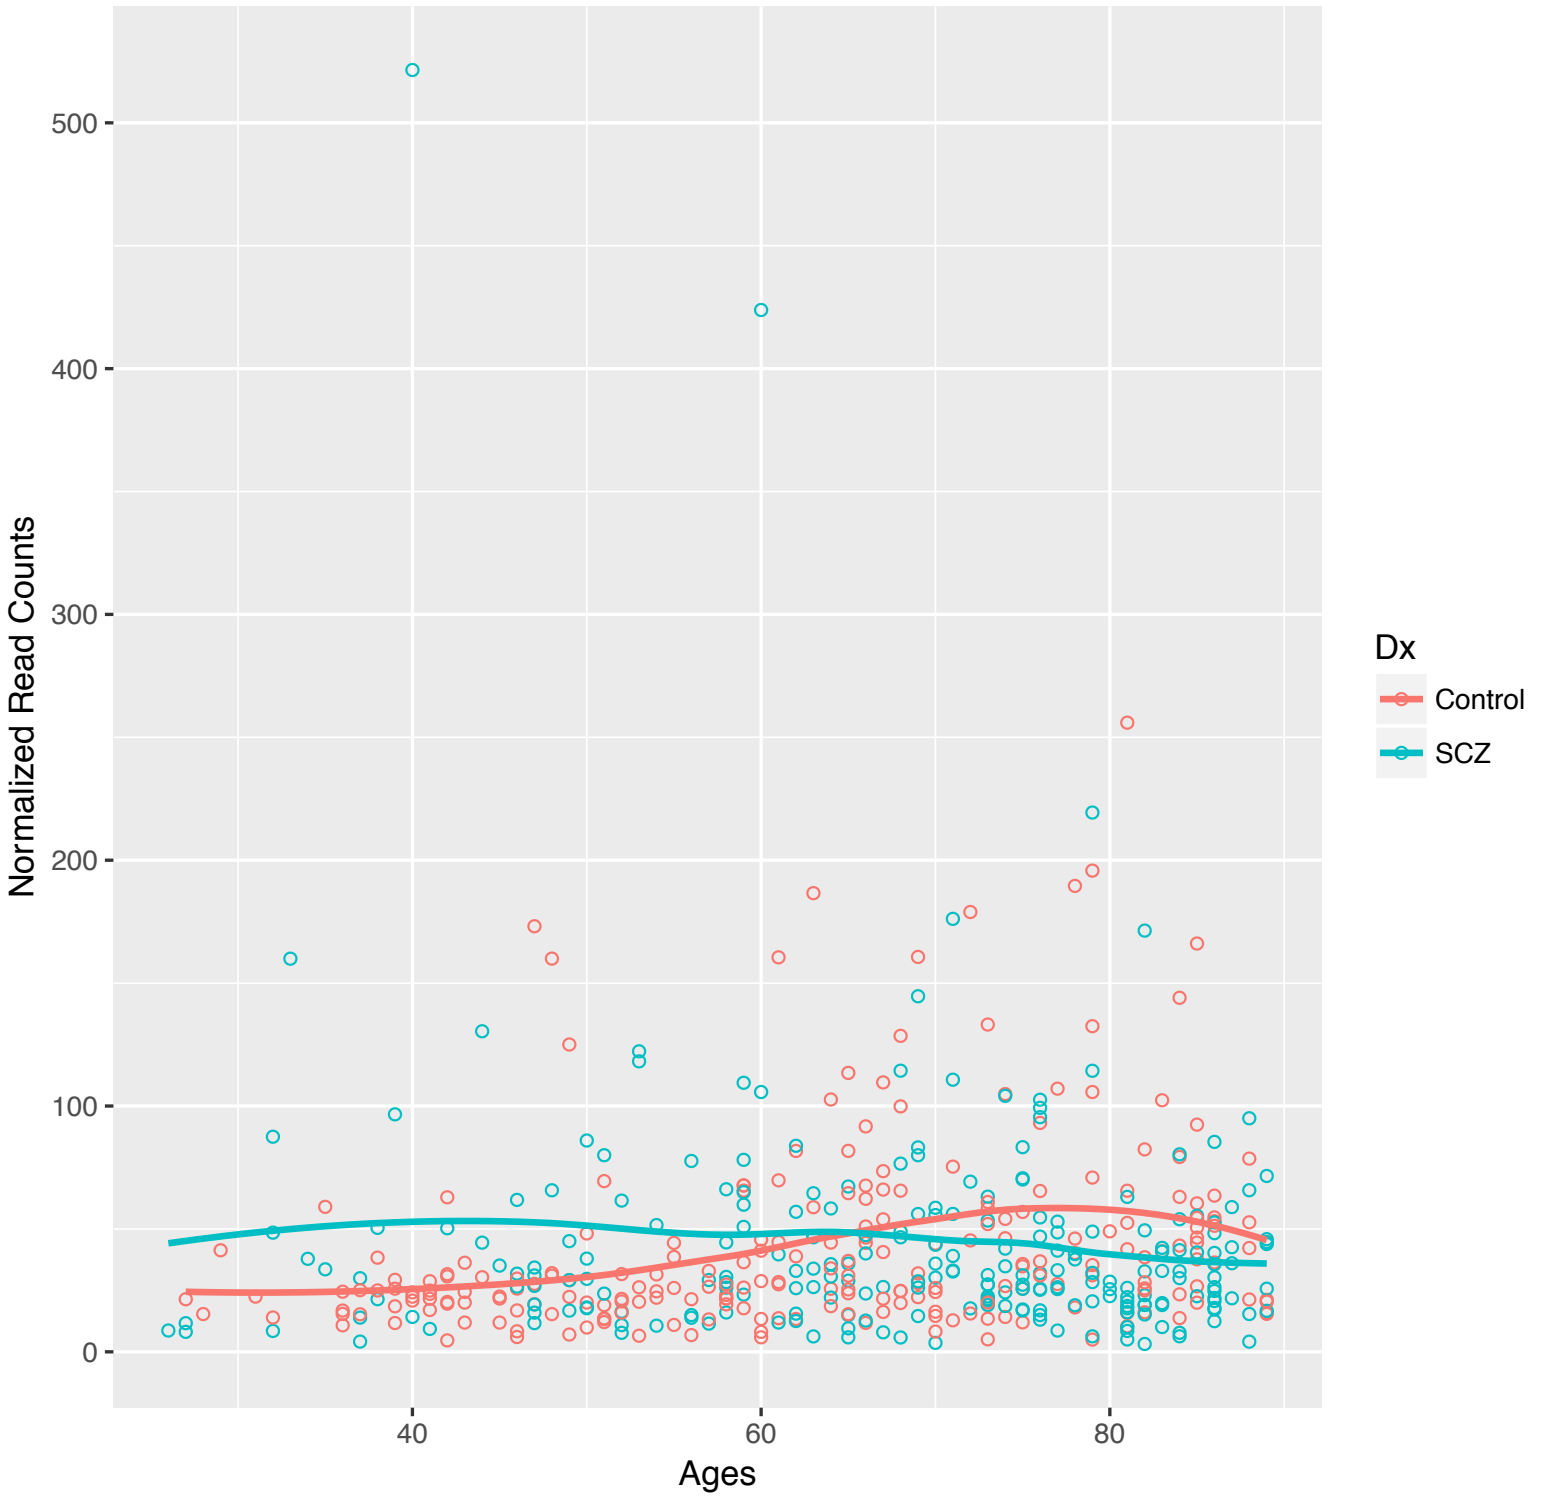

# COL8A1

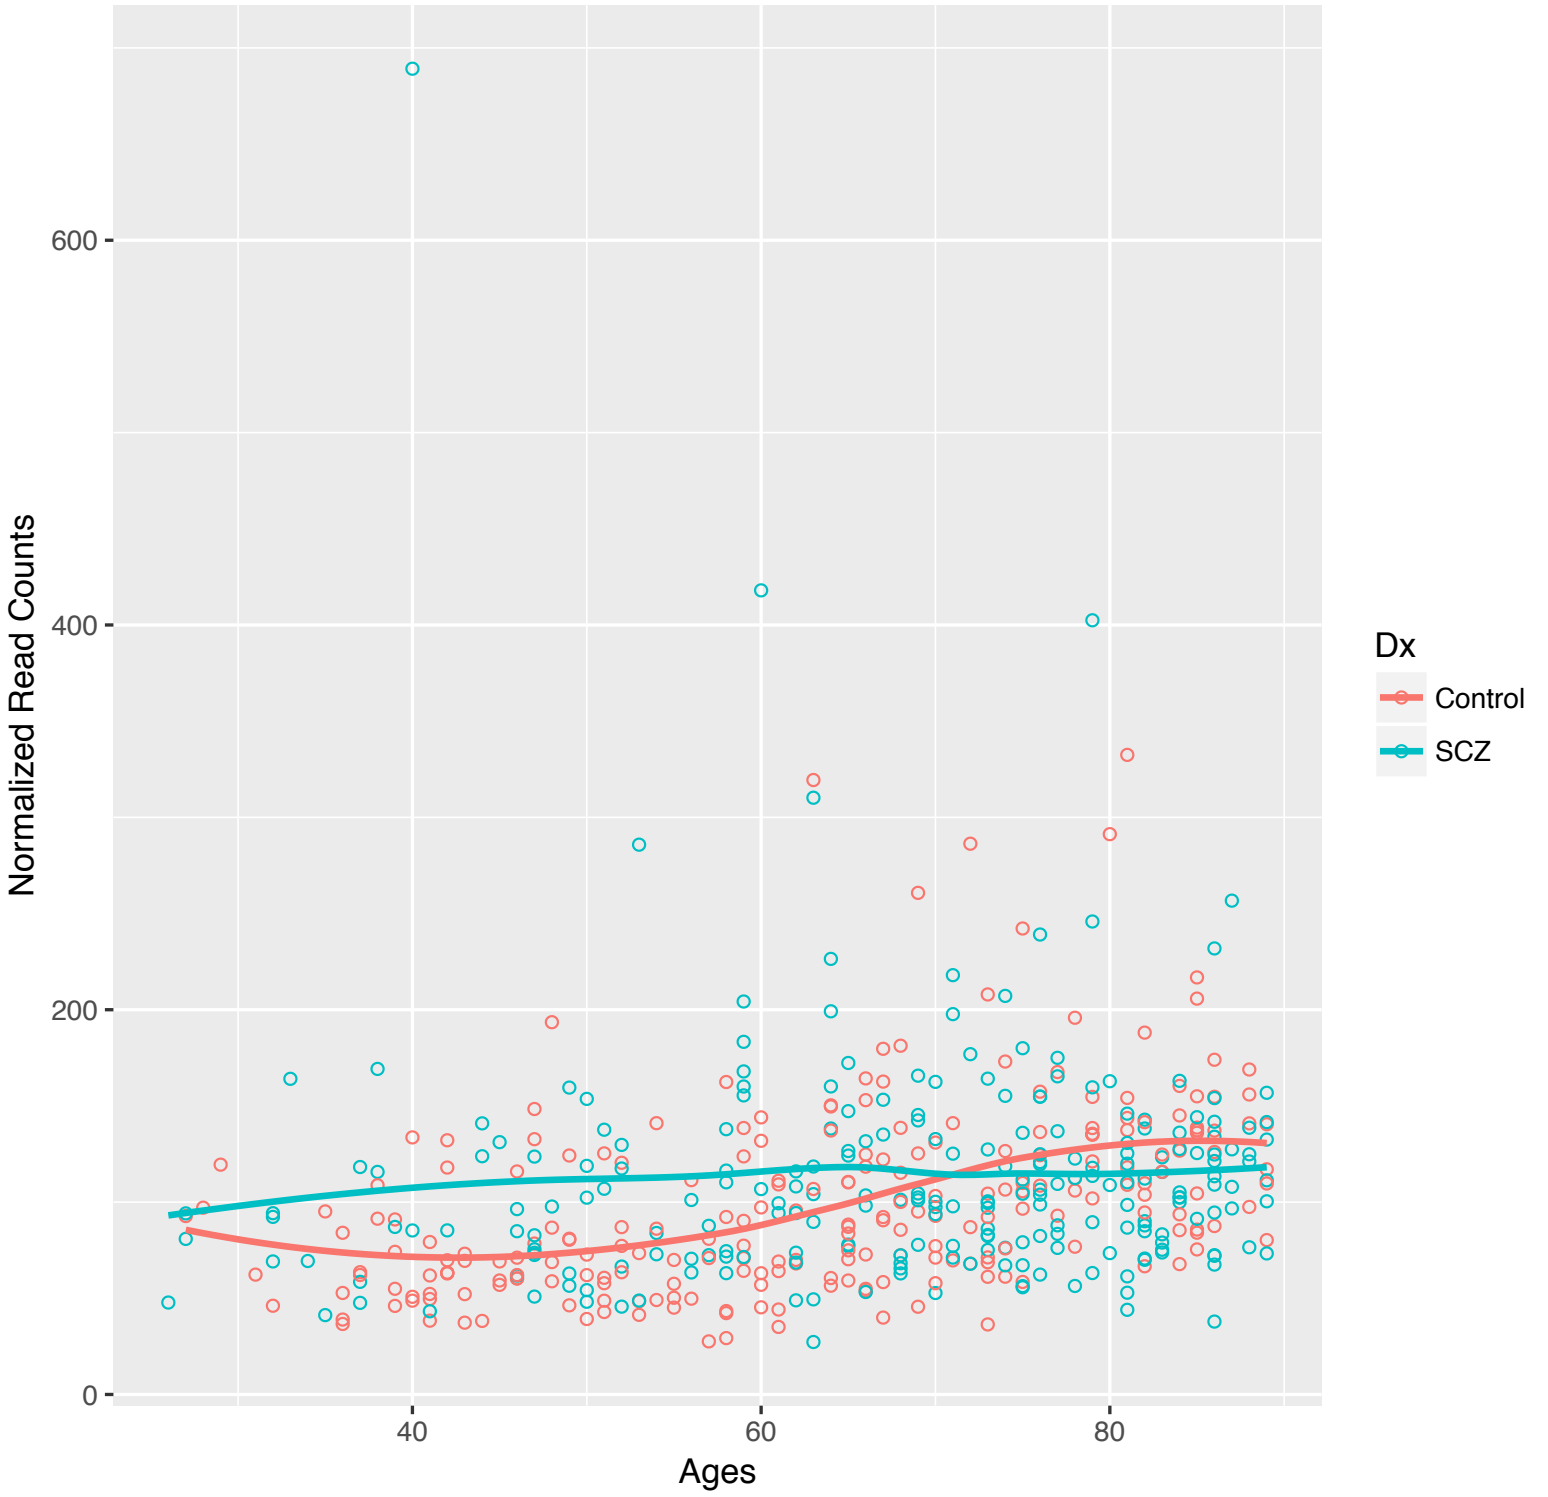

# LSMEM1

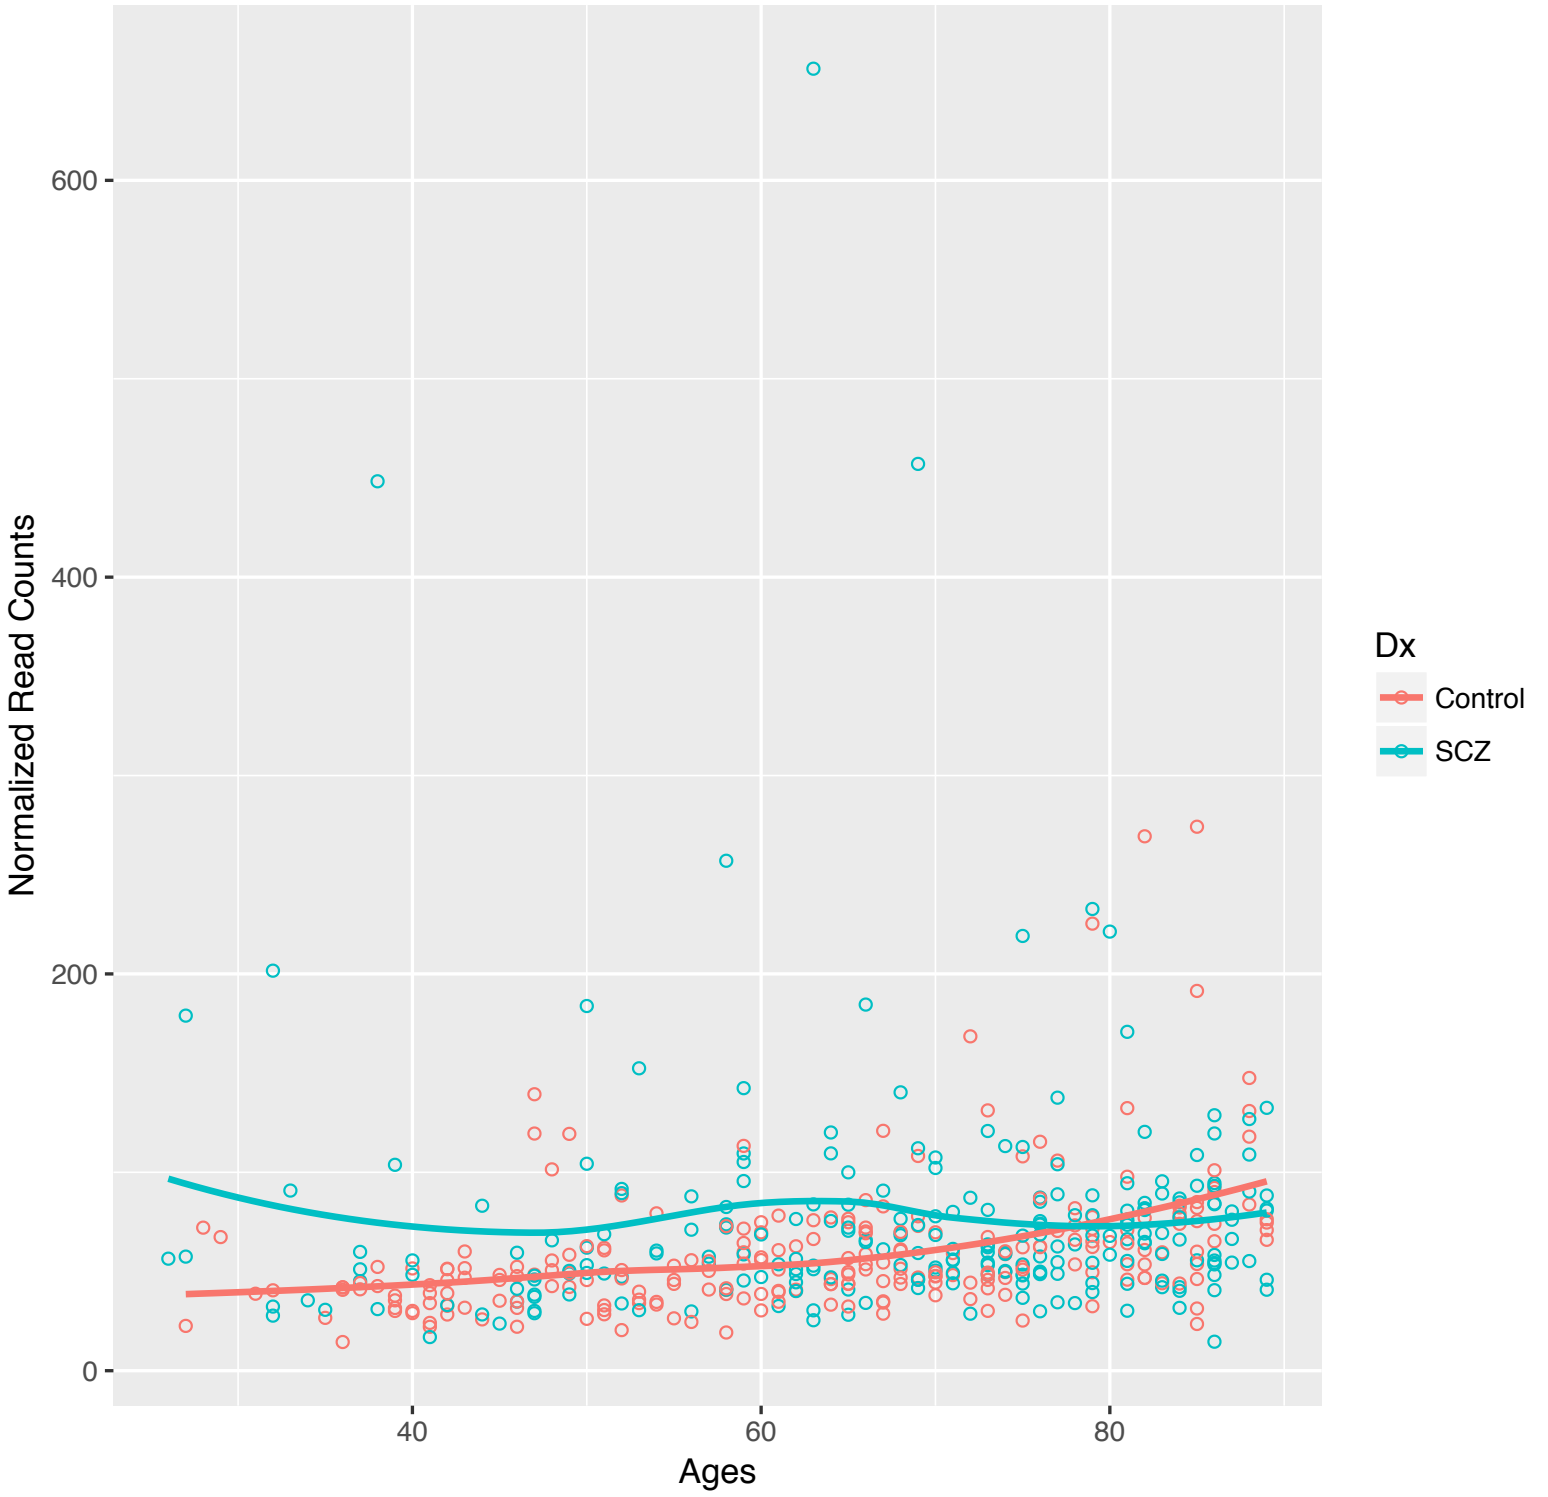

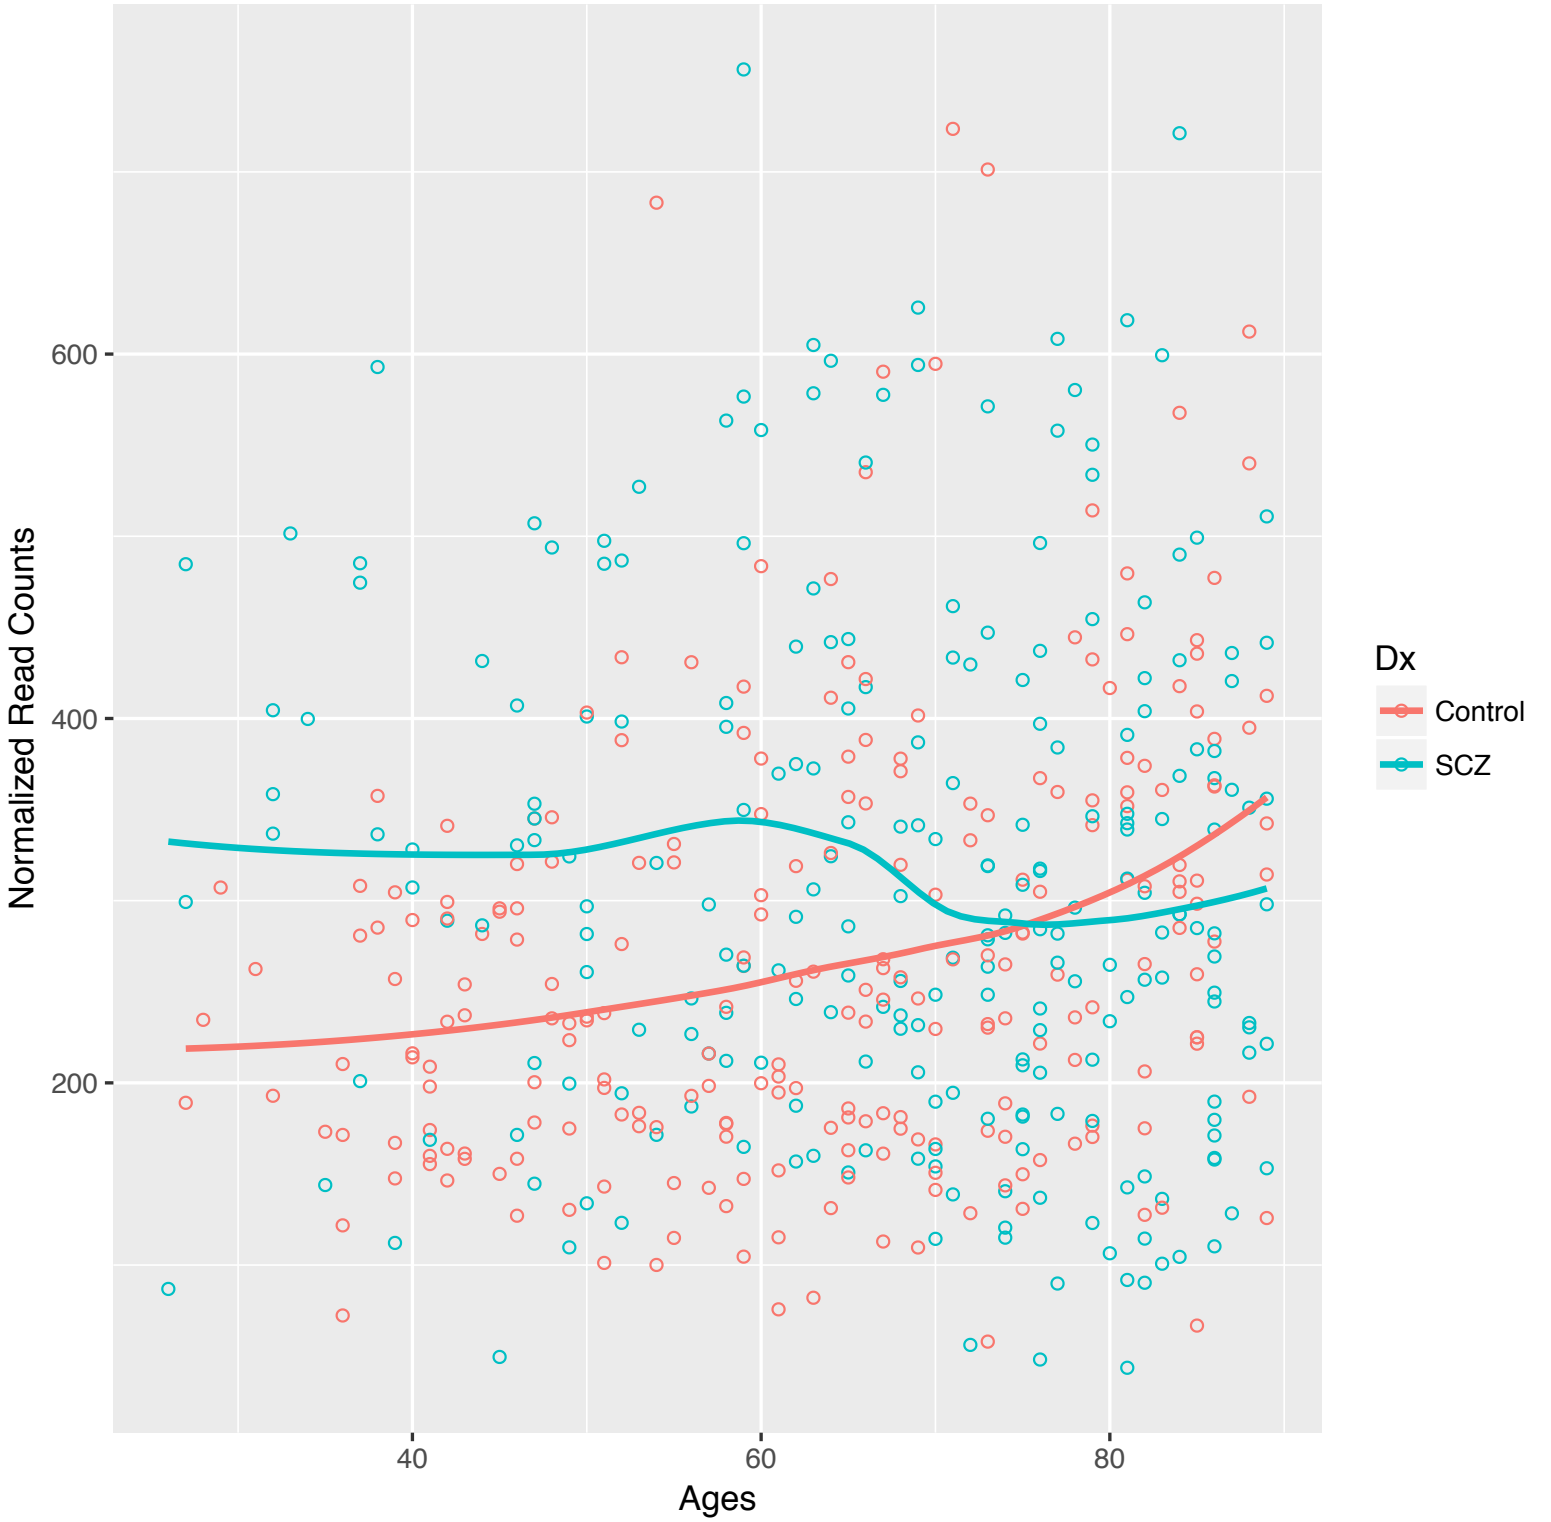

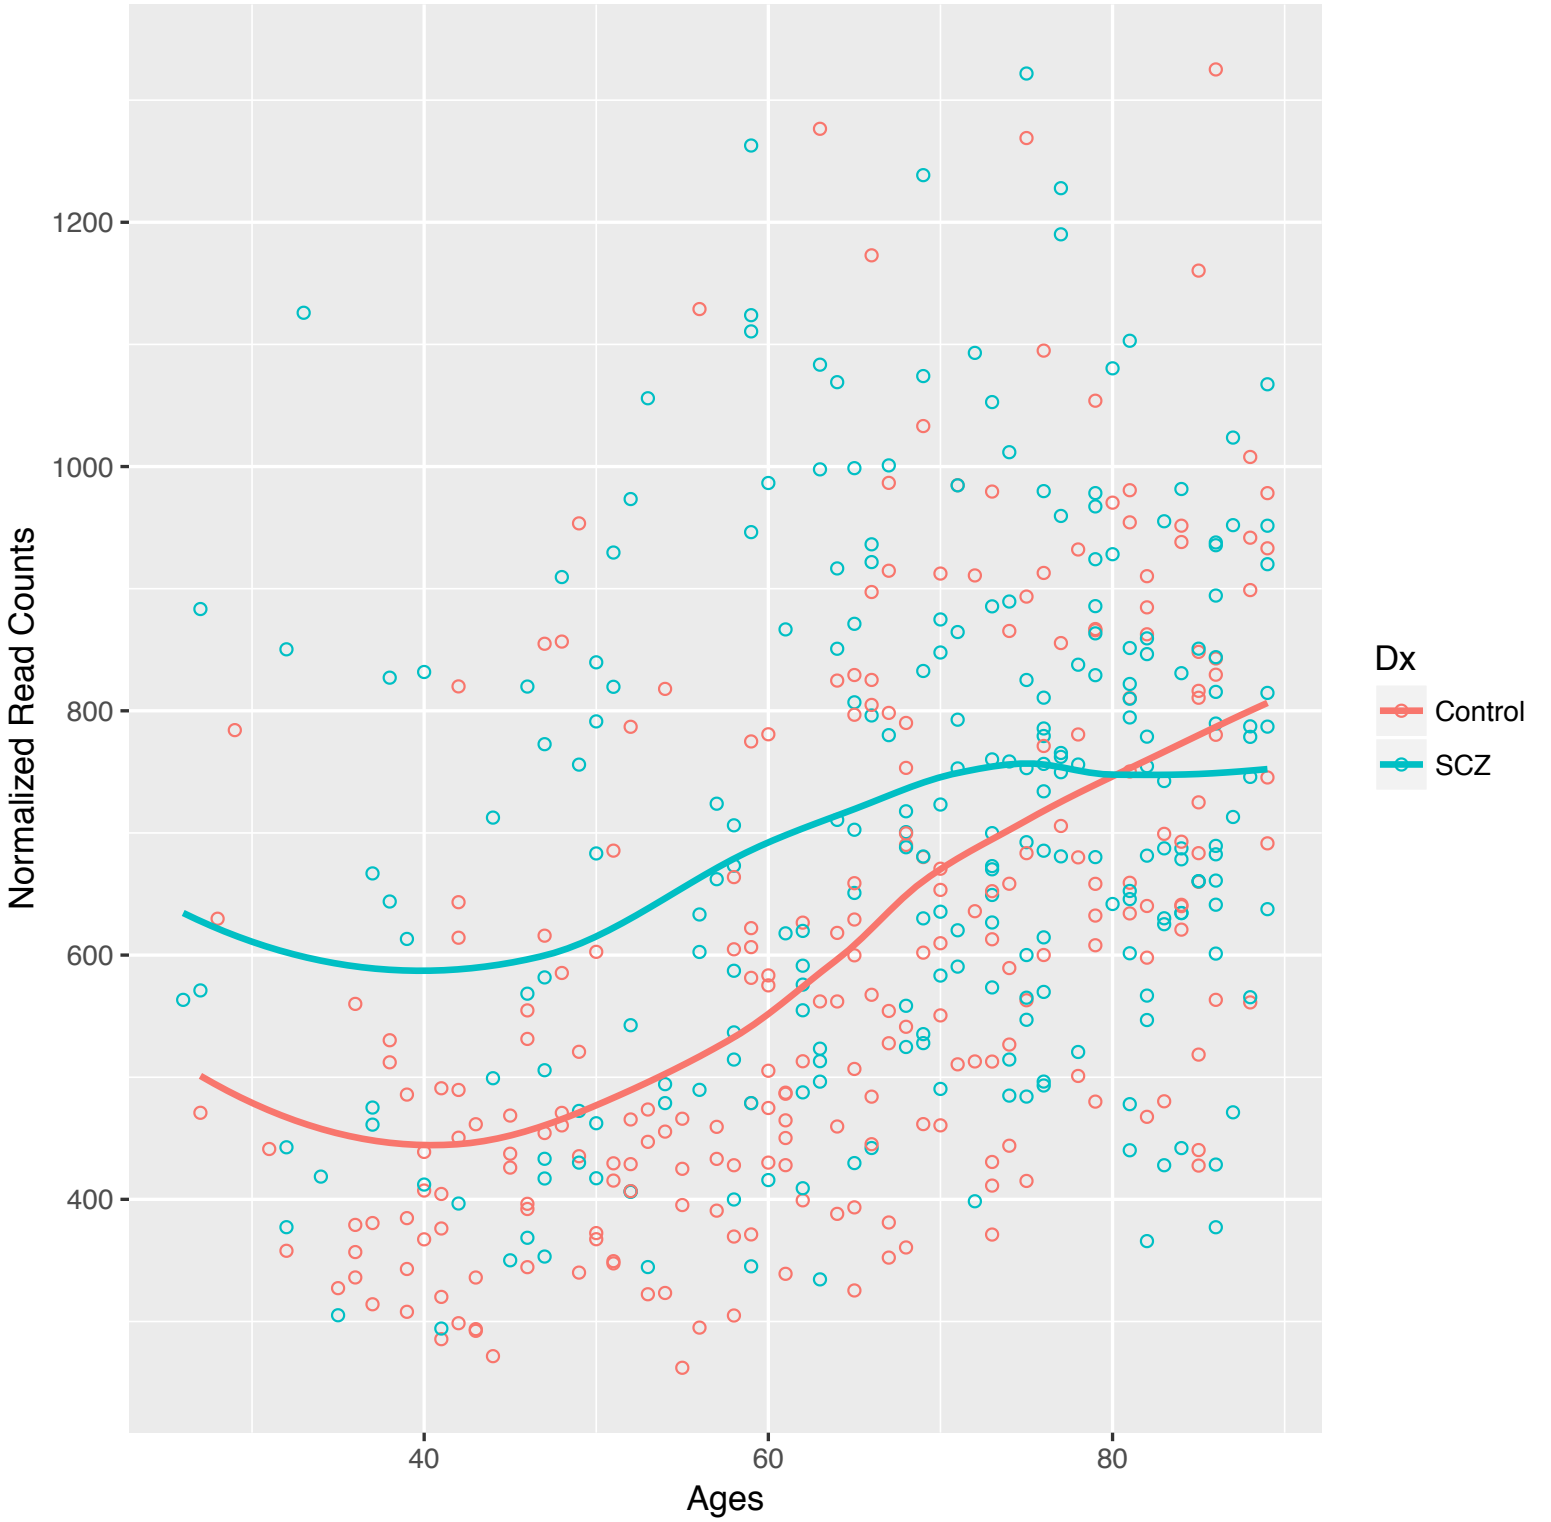

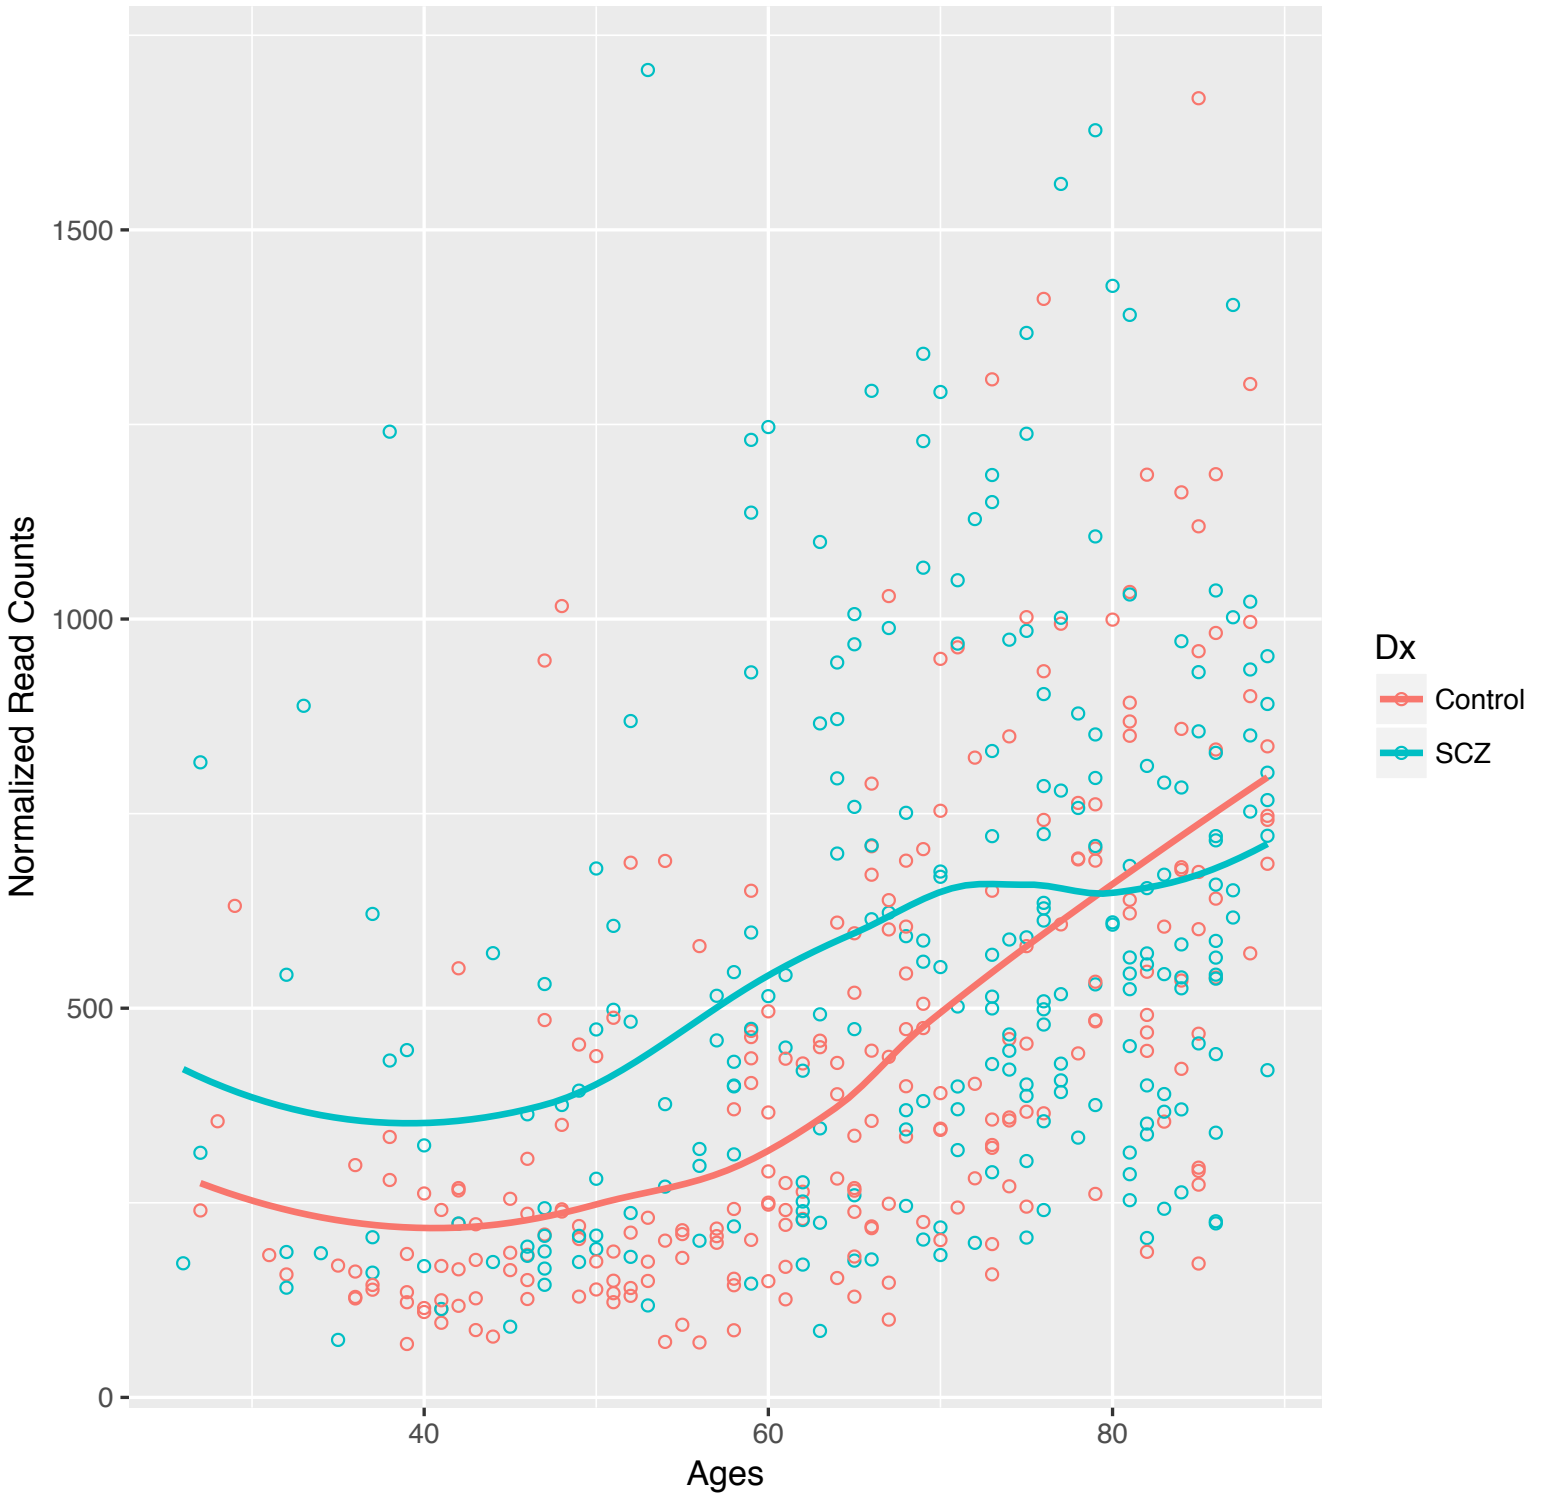

# RPS3AP38

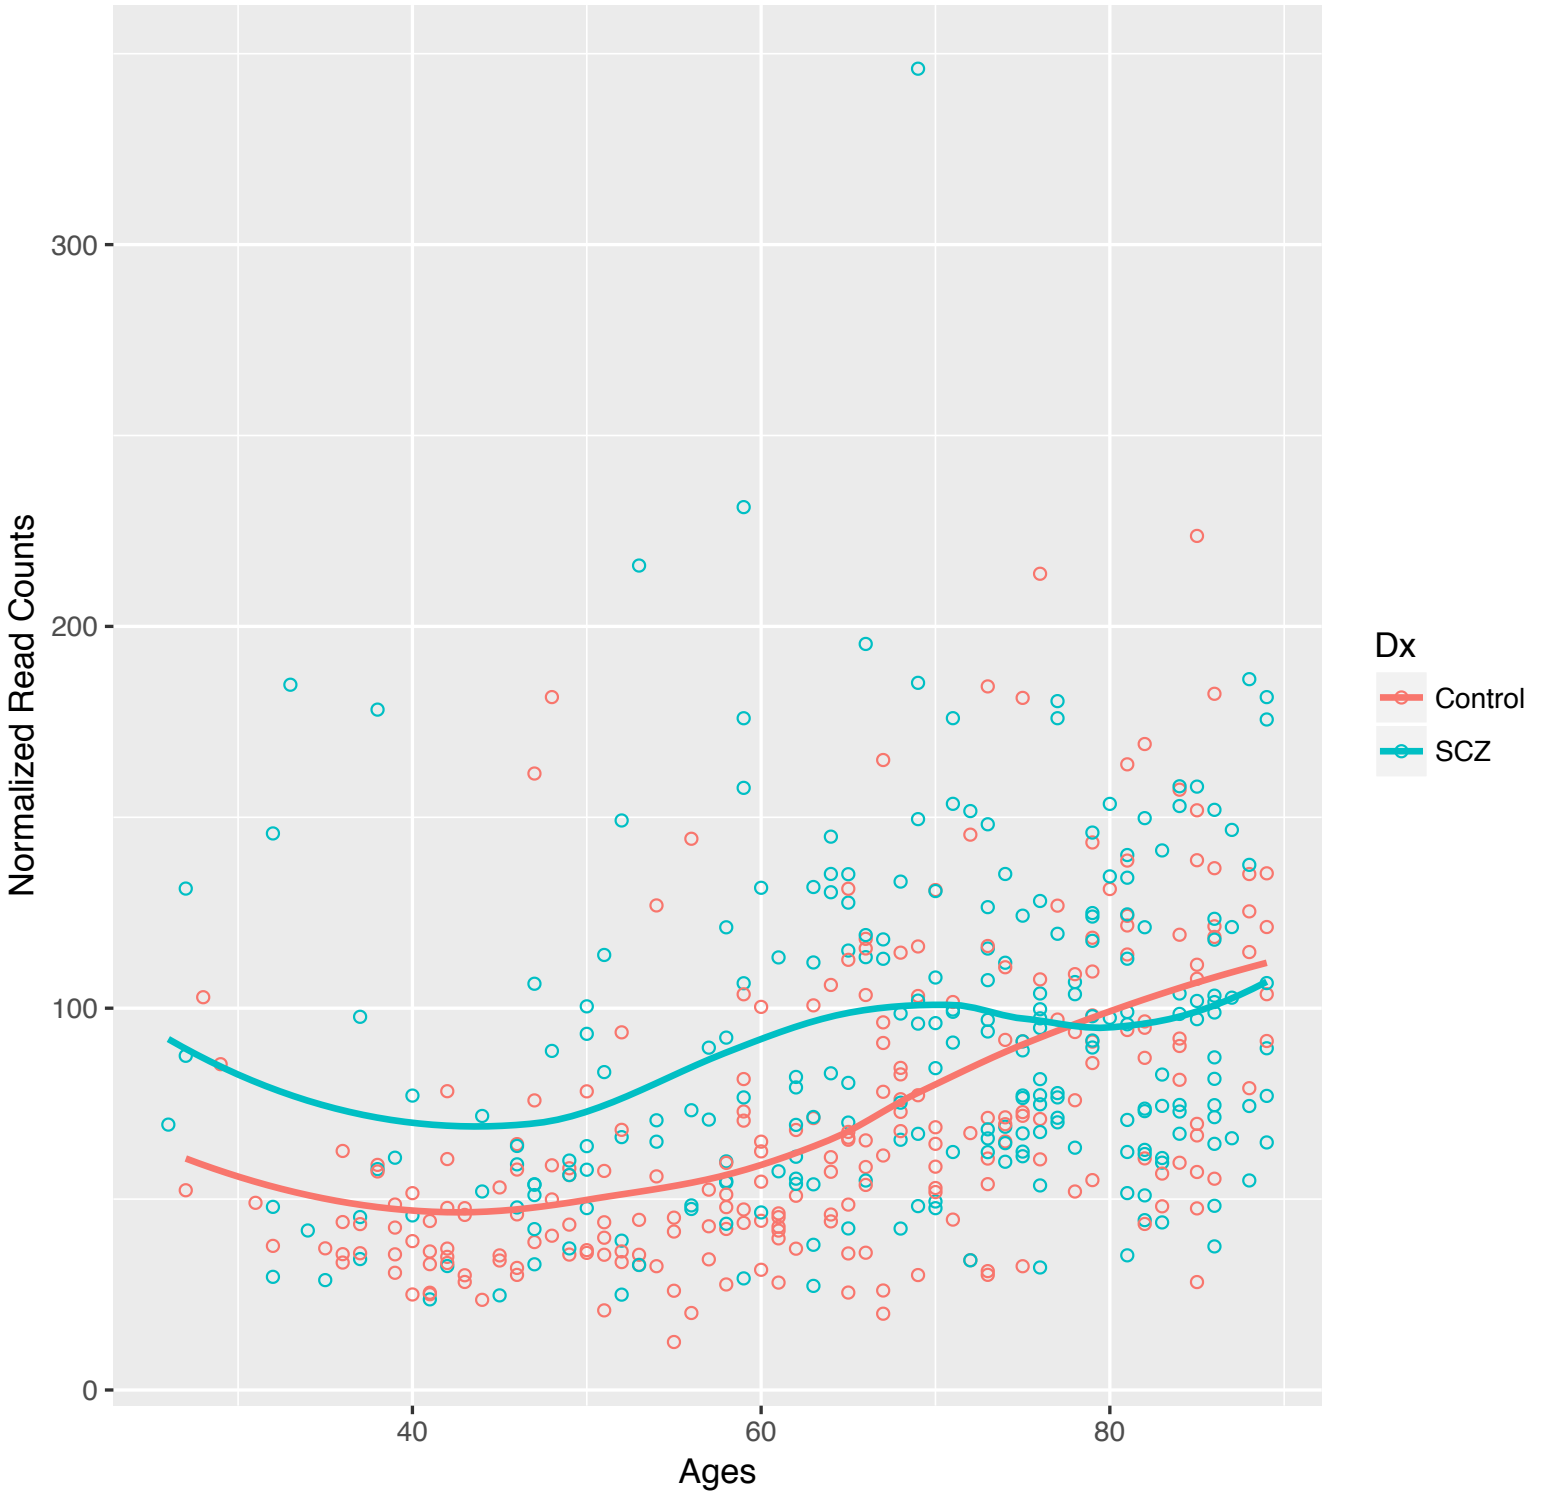

# MGST3

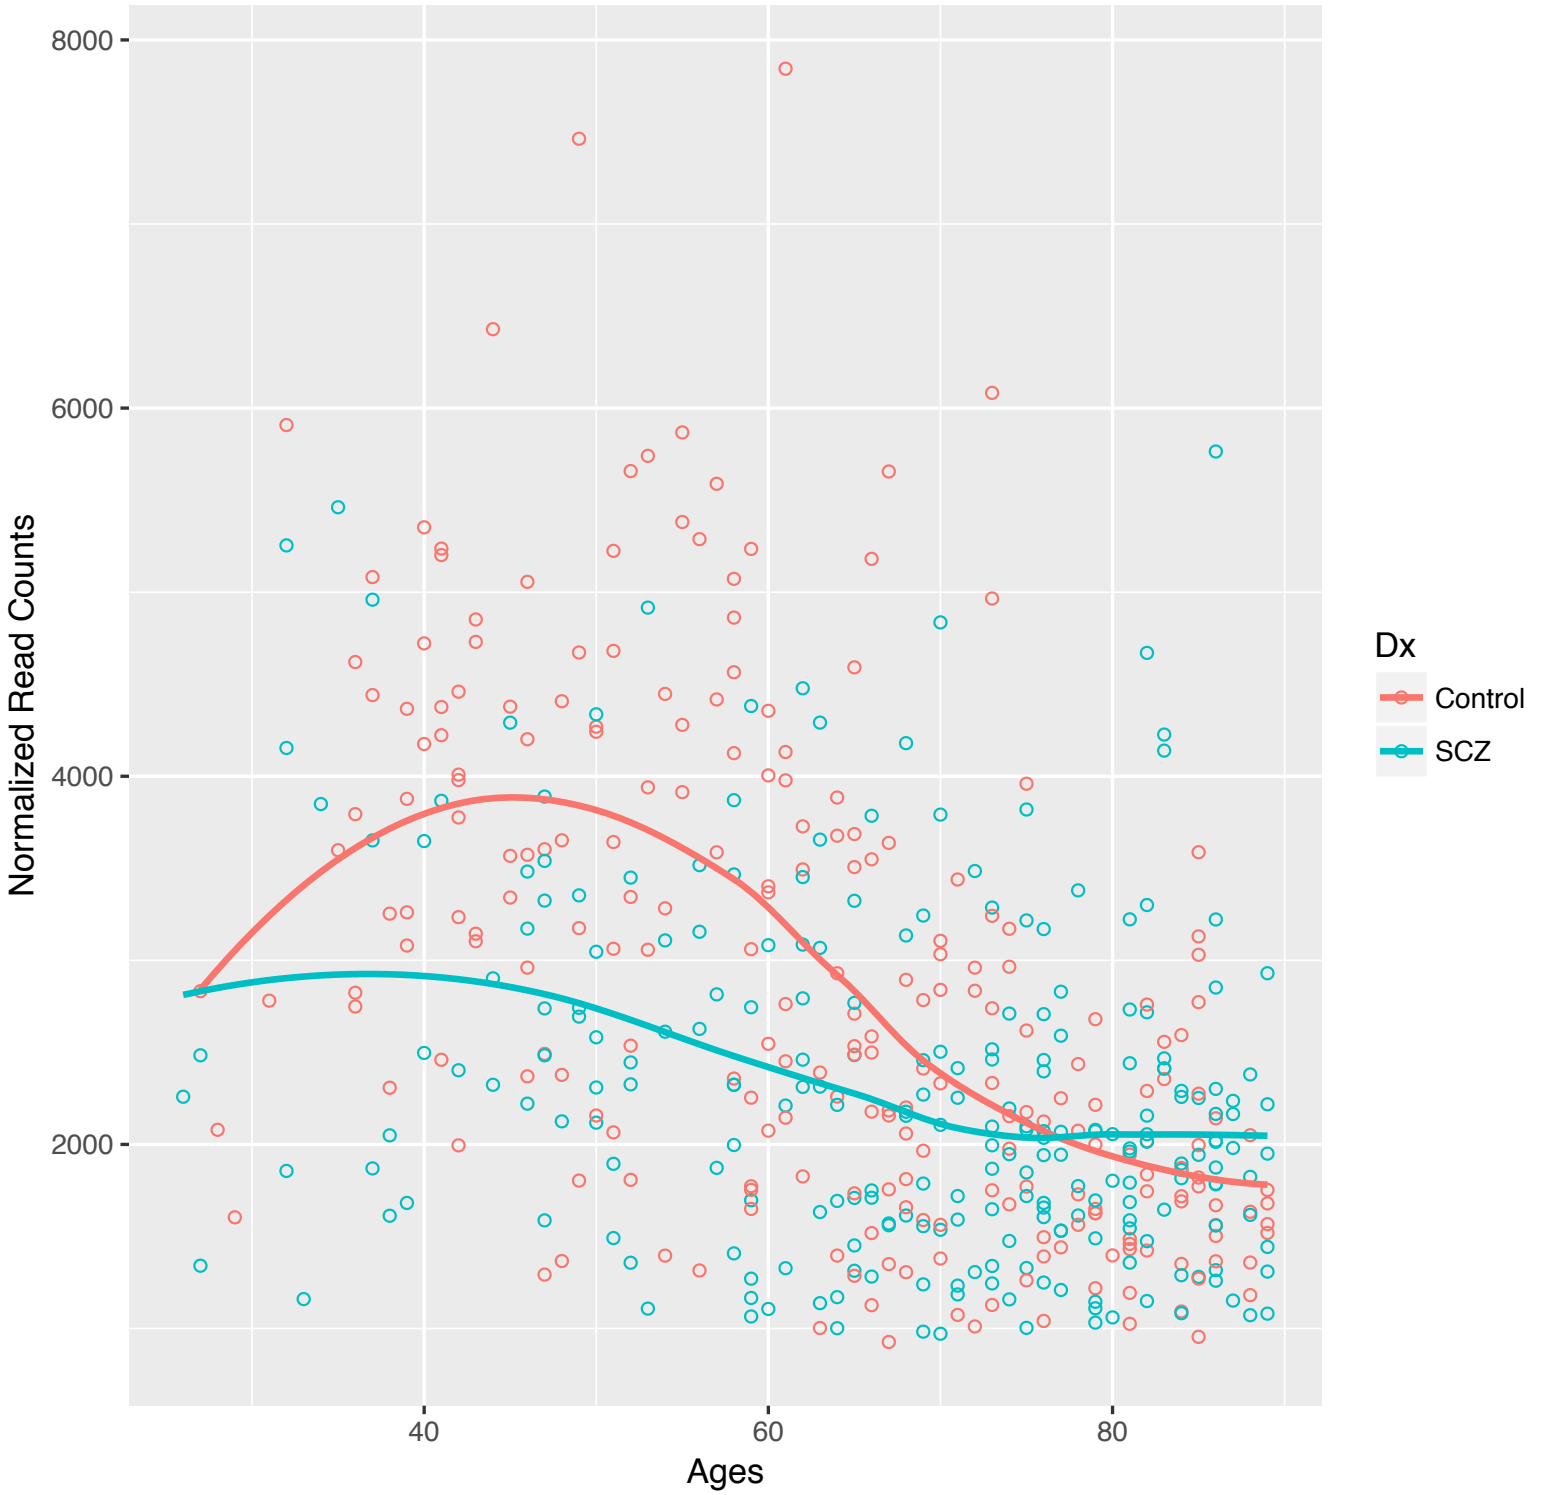



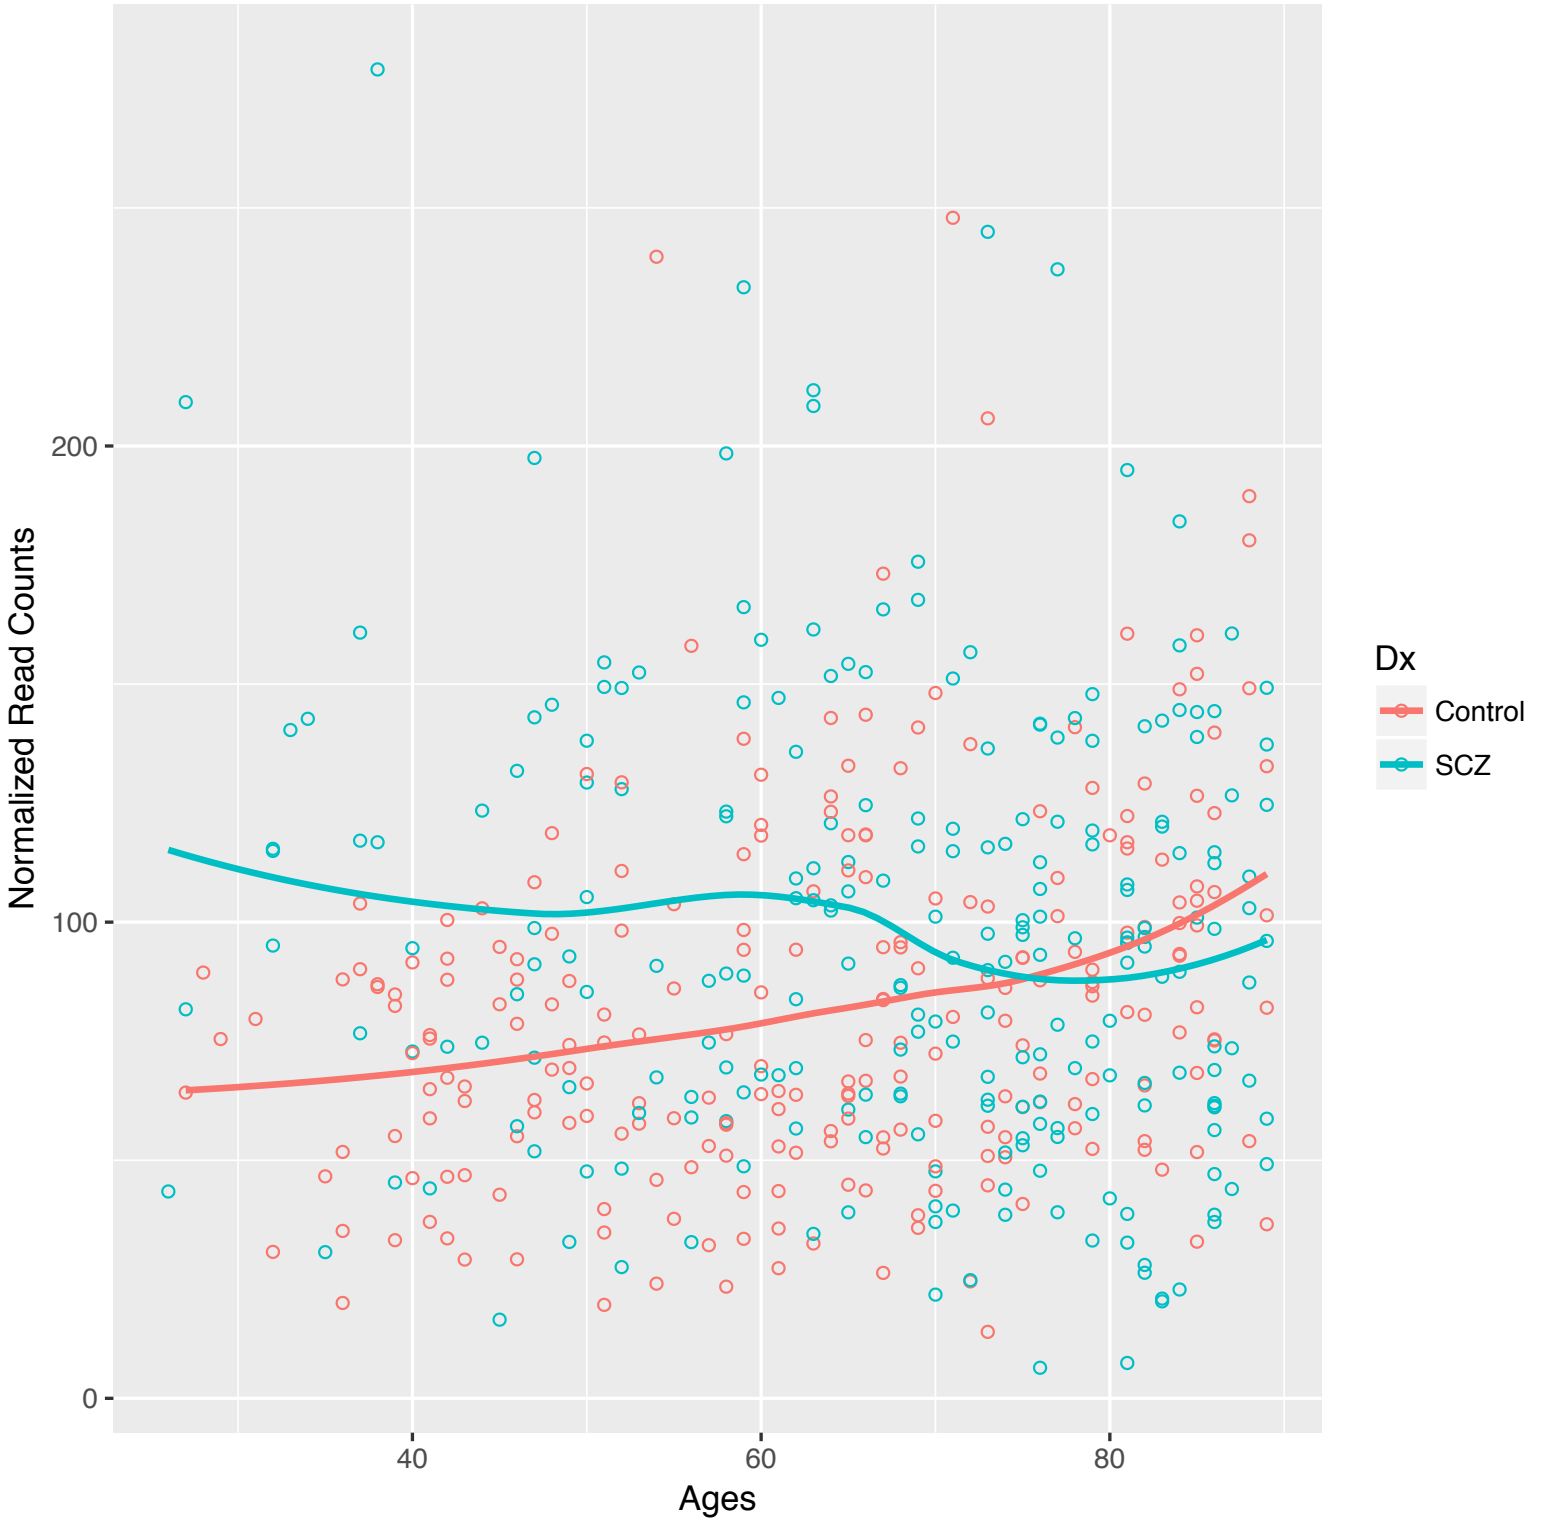

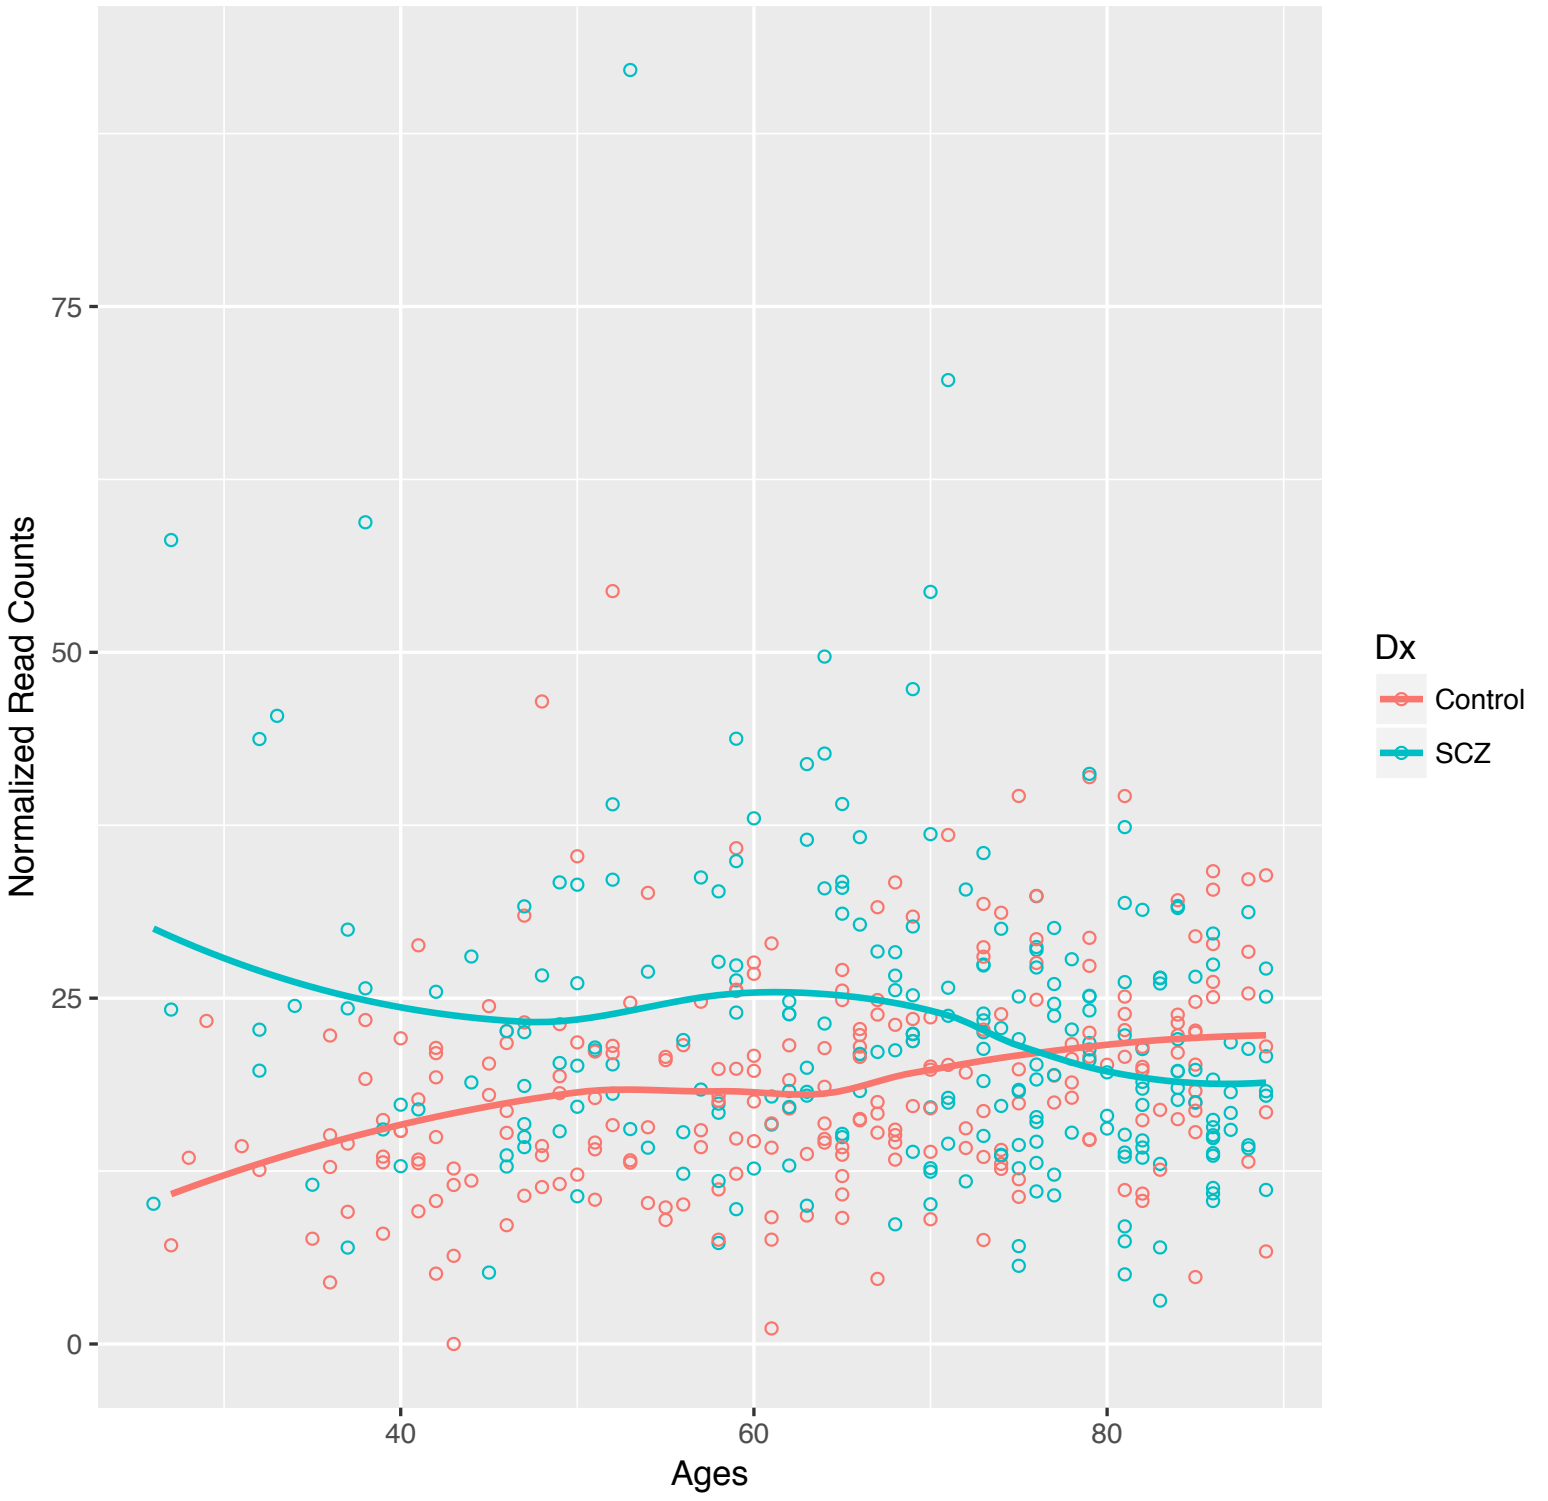

# ARHGDIG

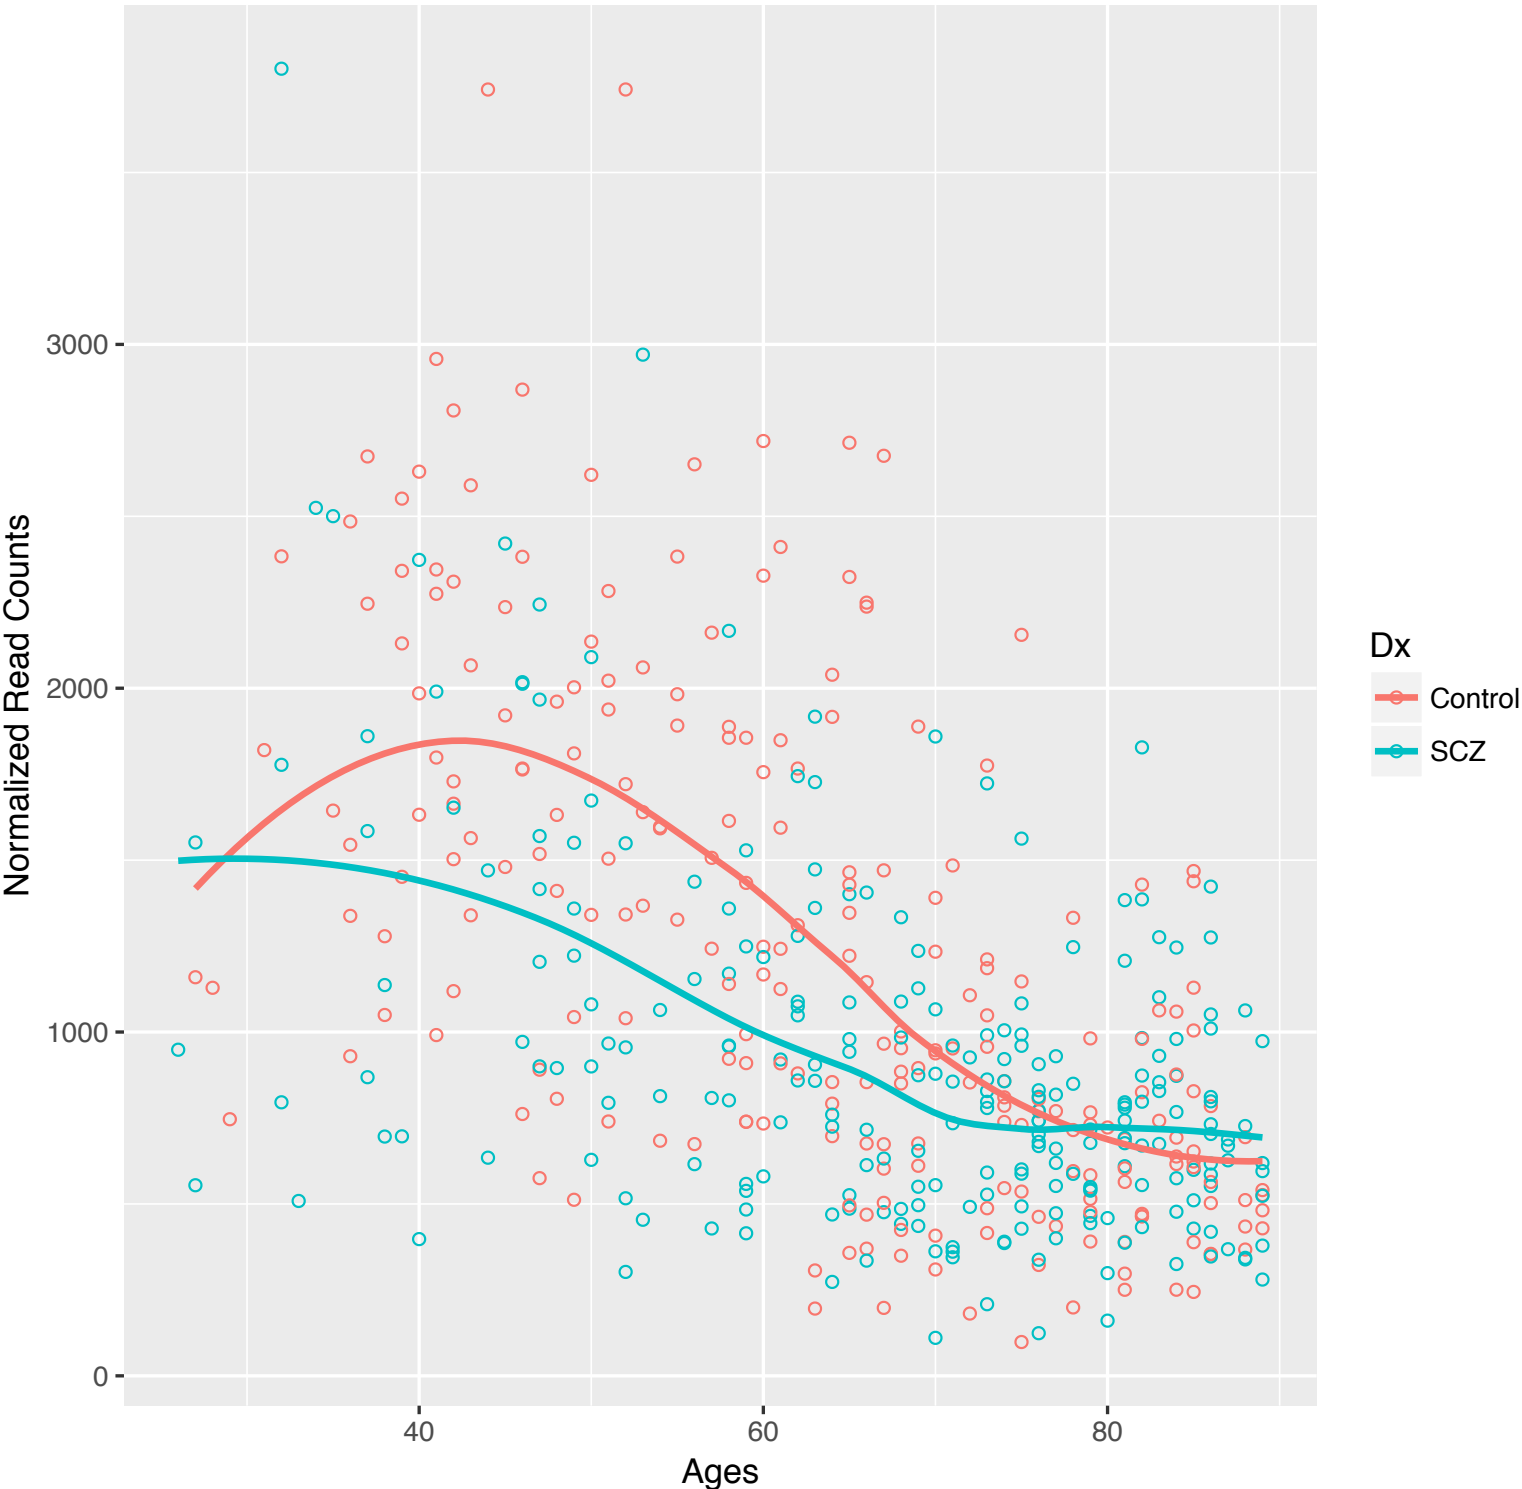

# MYL6B

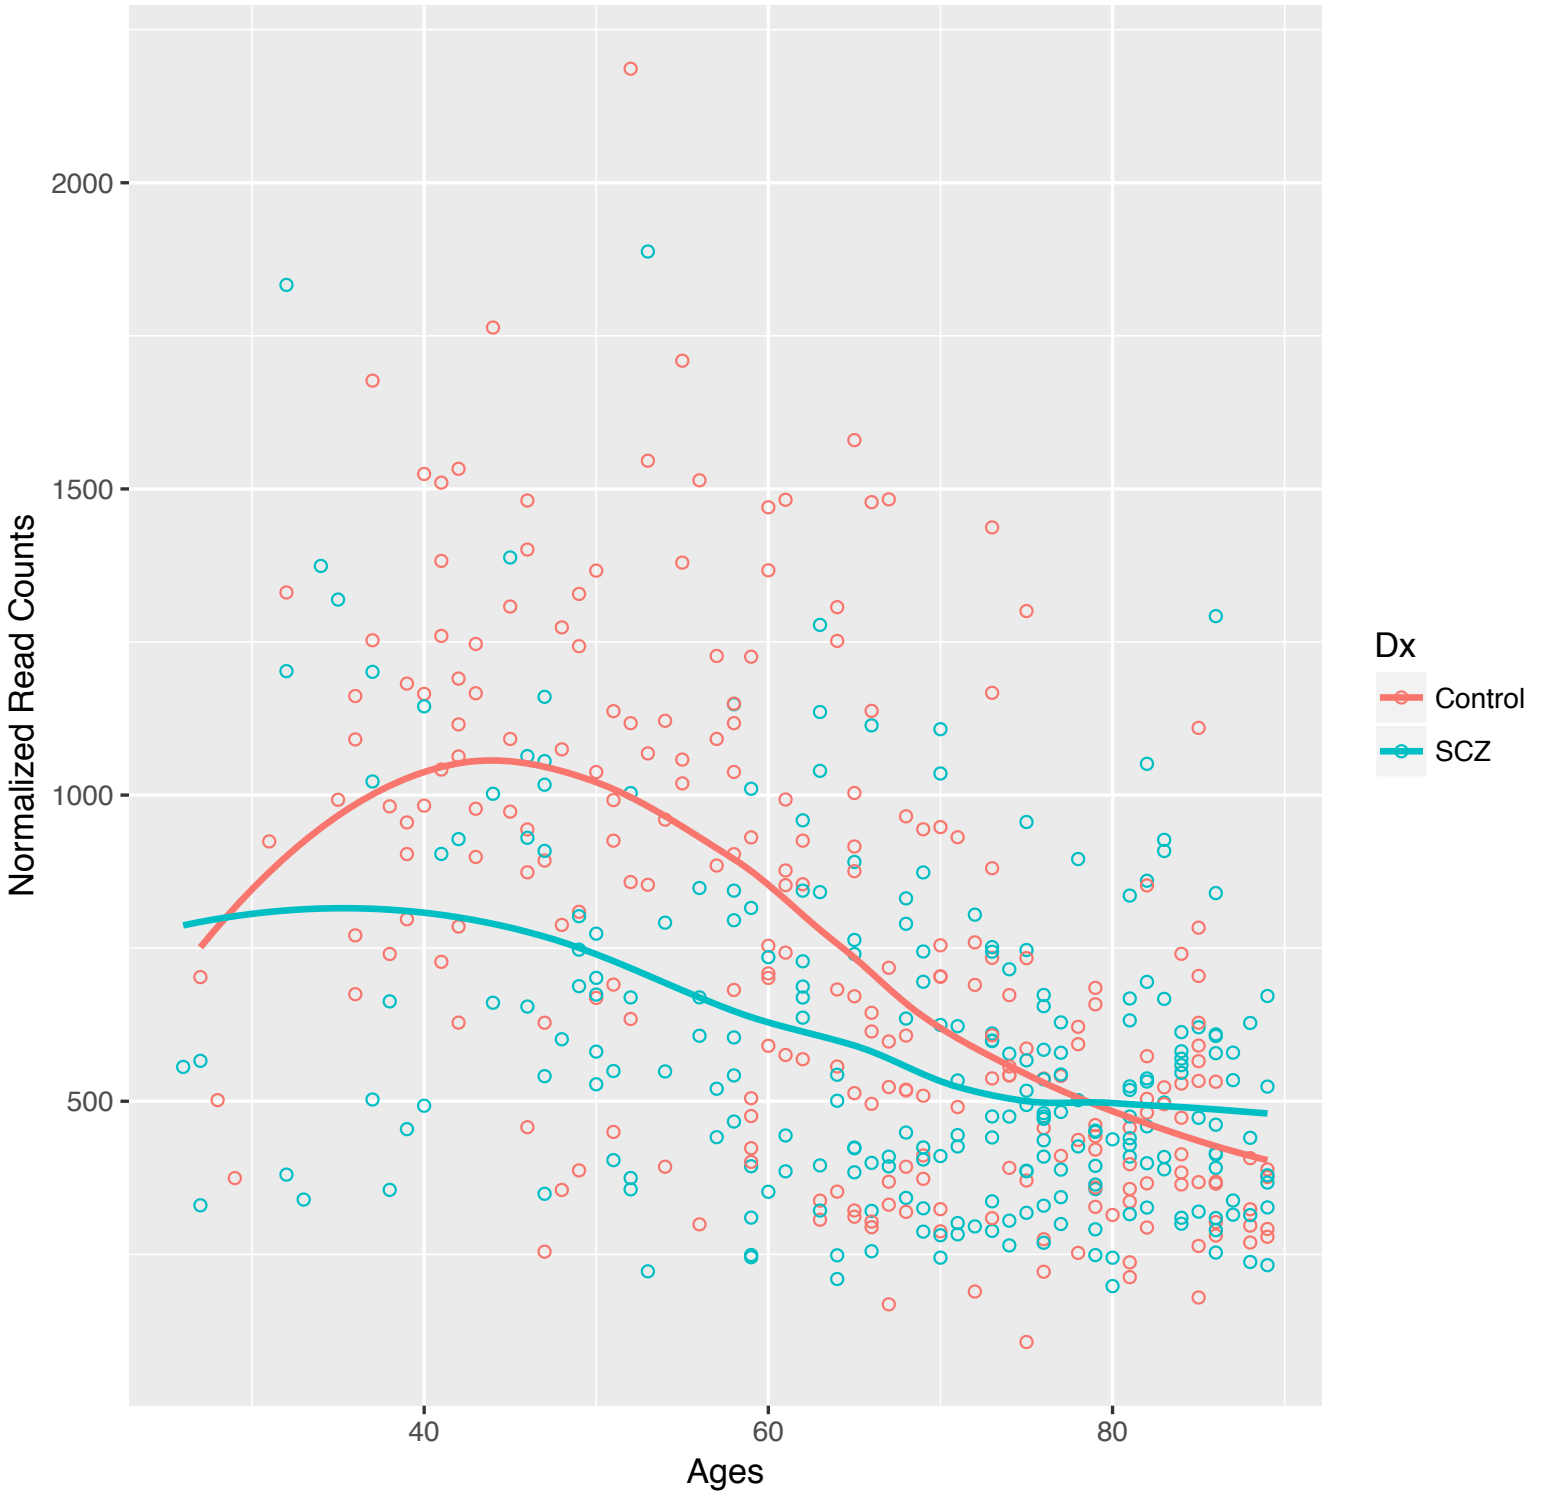

# LPIN3

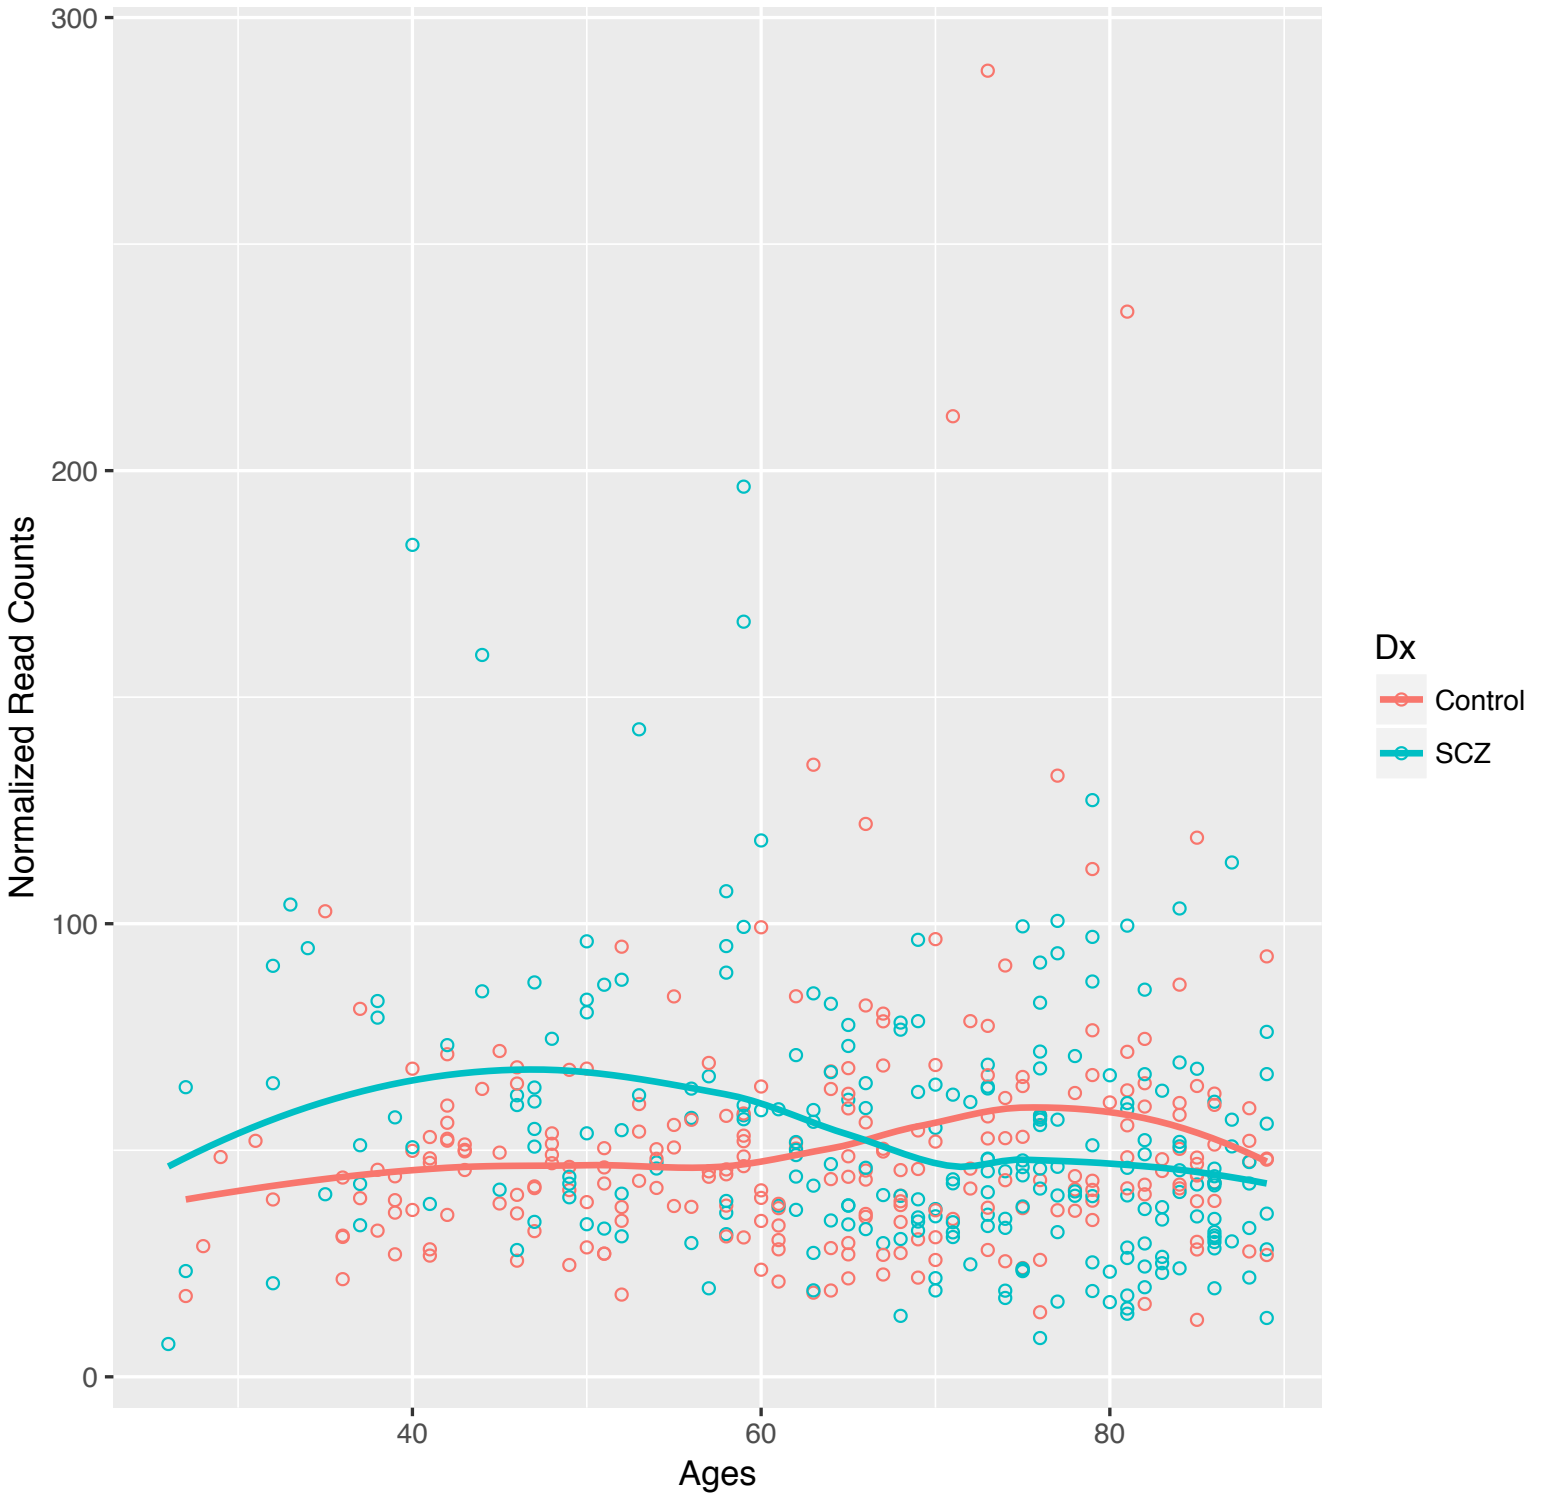

# AGTPBP1

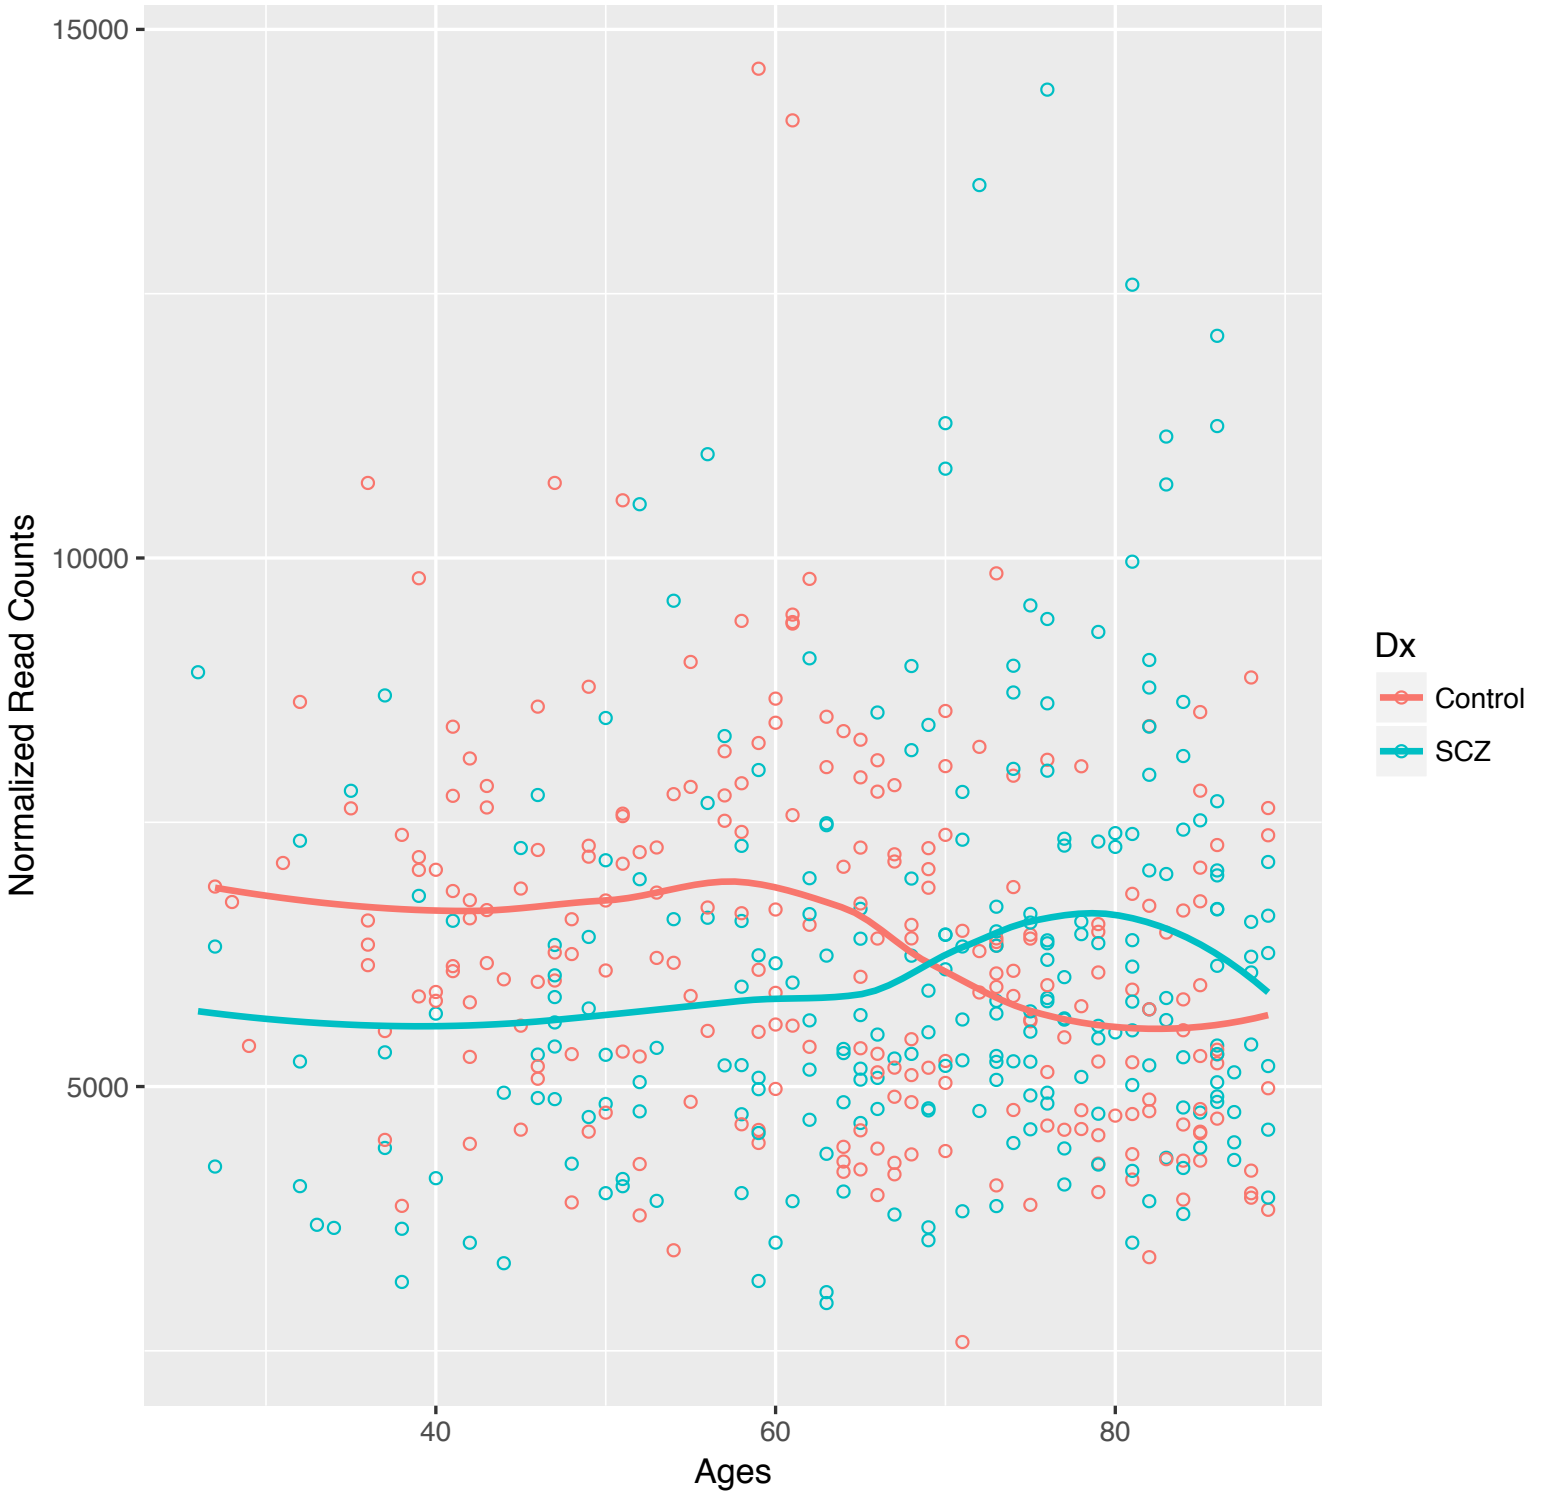

# STAB2

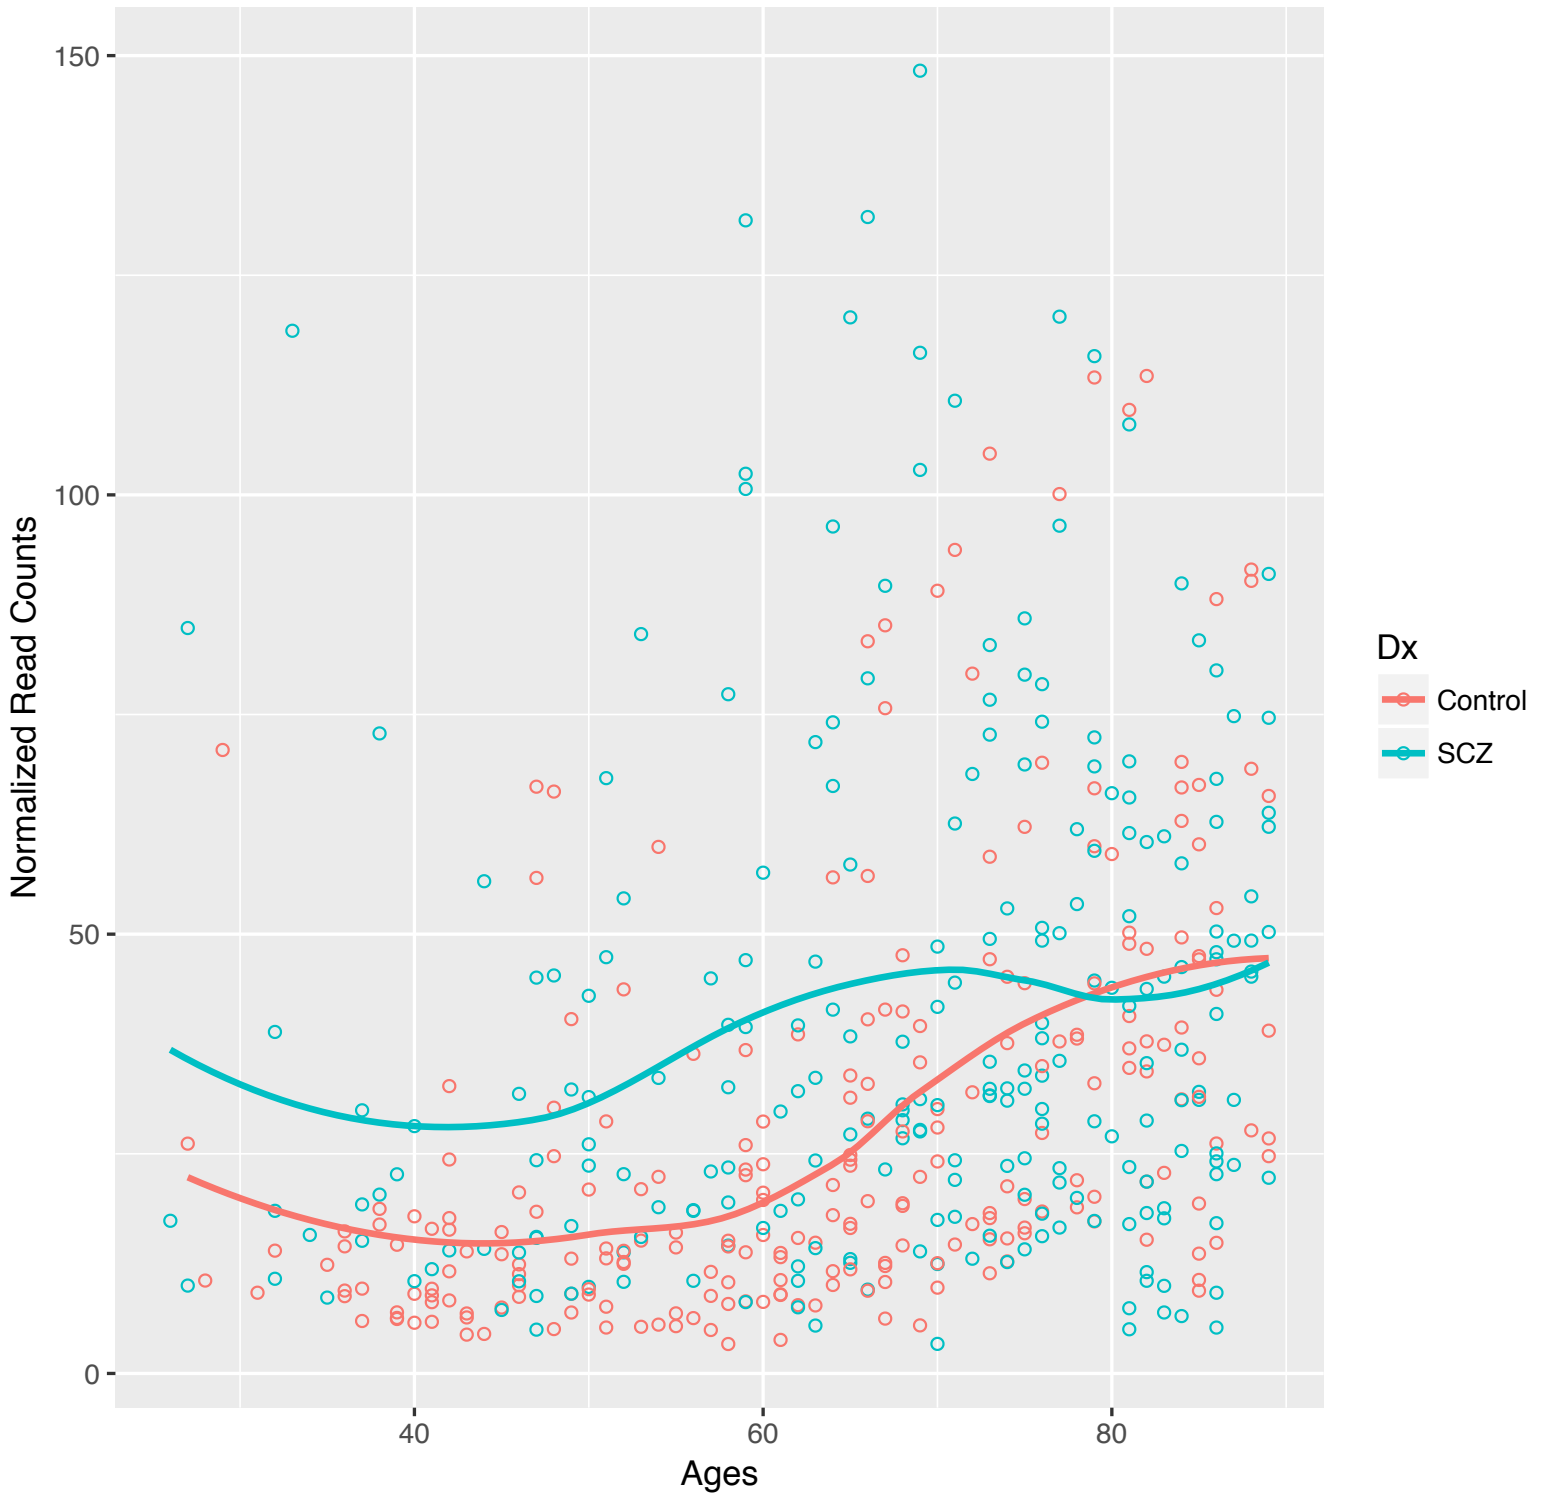

# PTPN2P2

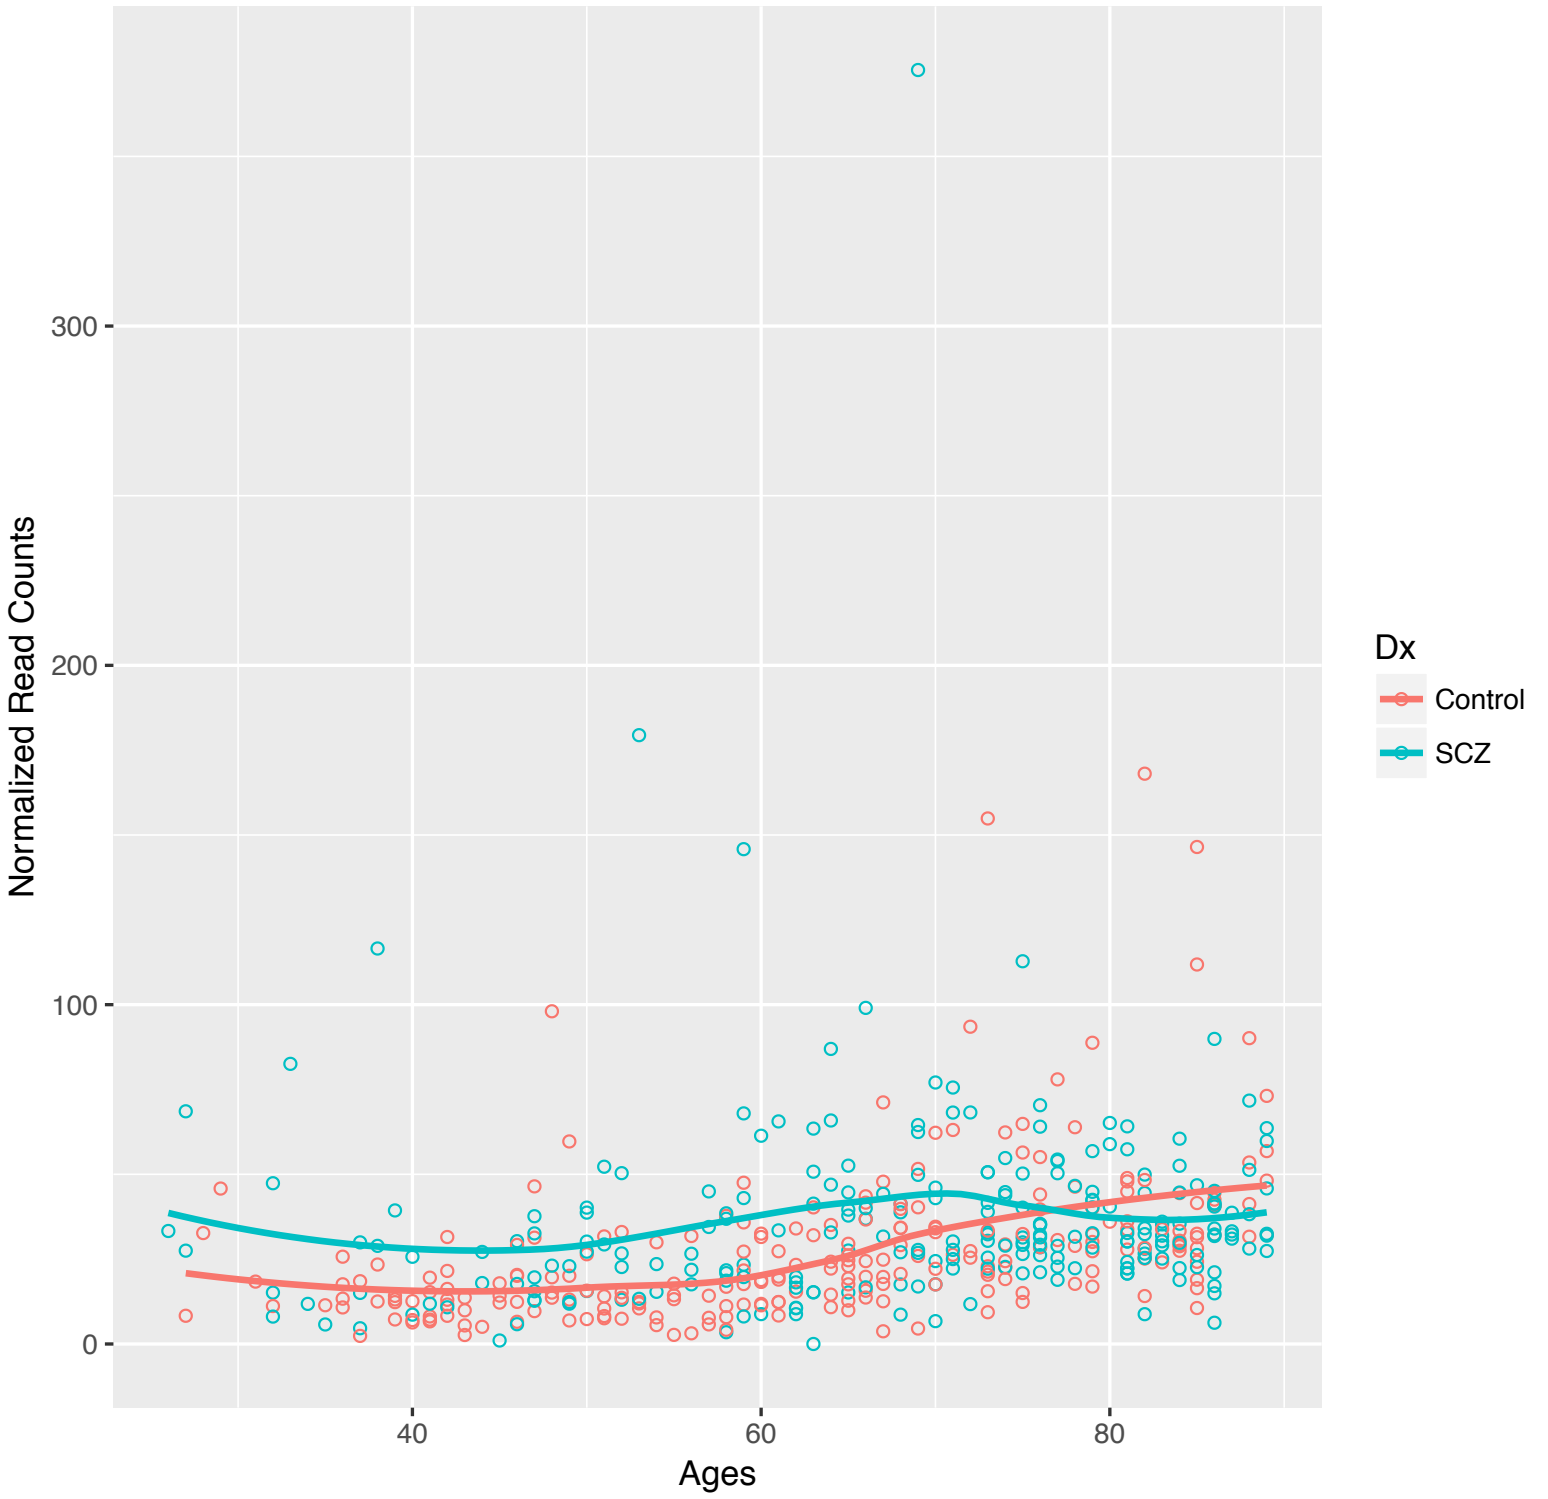



# LRRC17

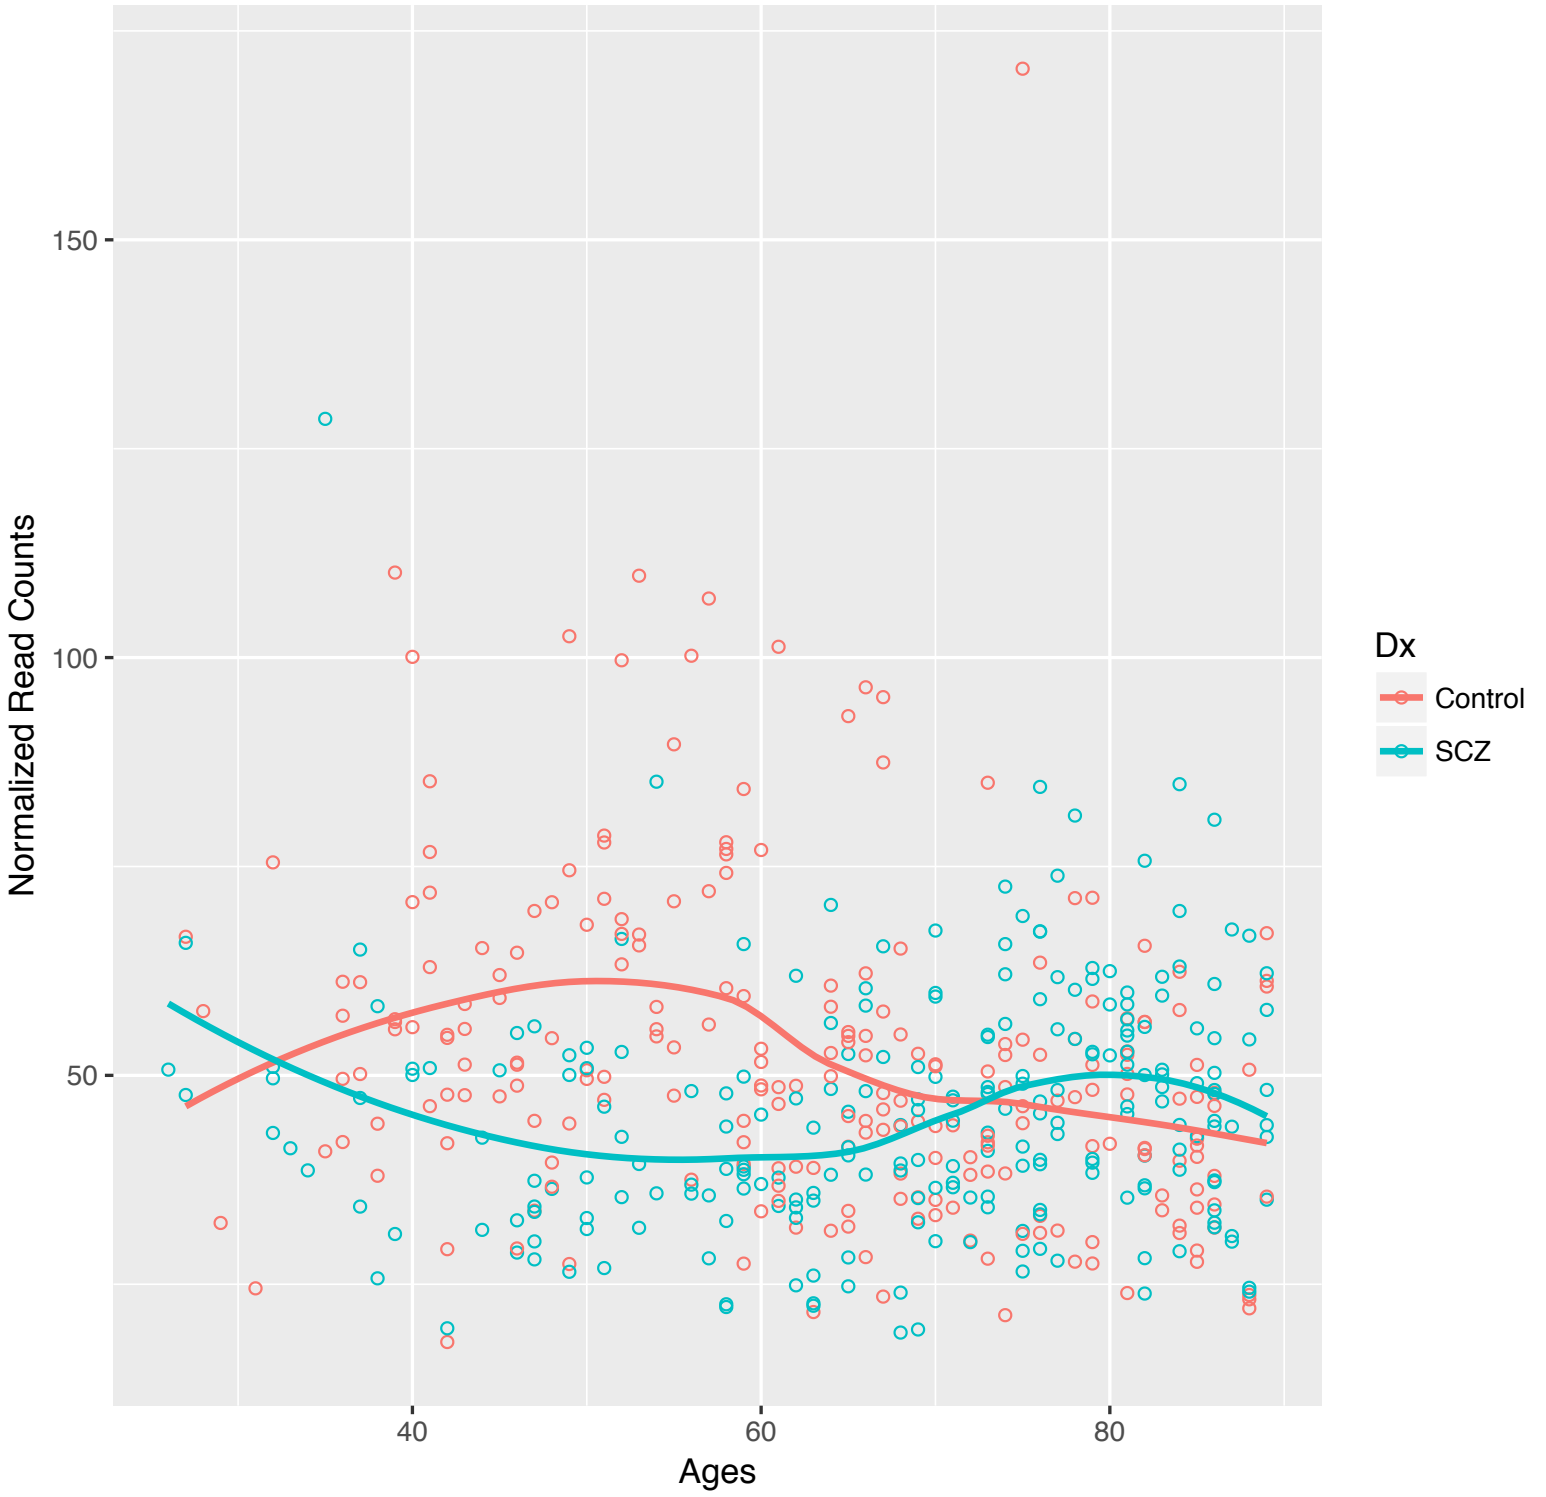

# ZBTB14

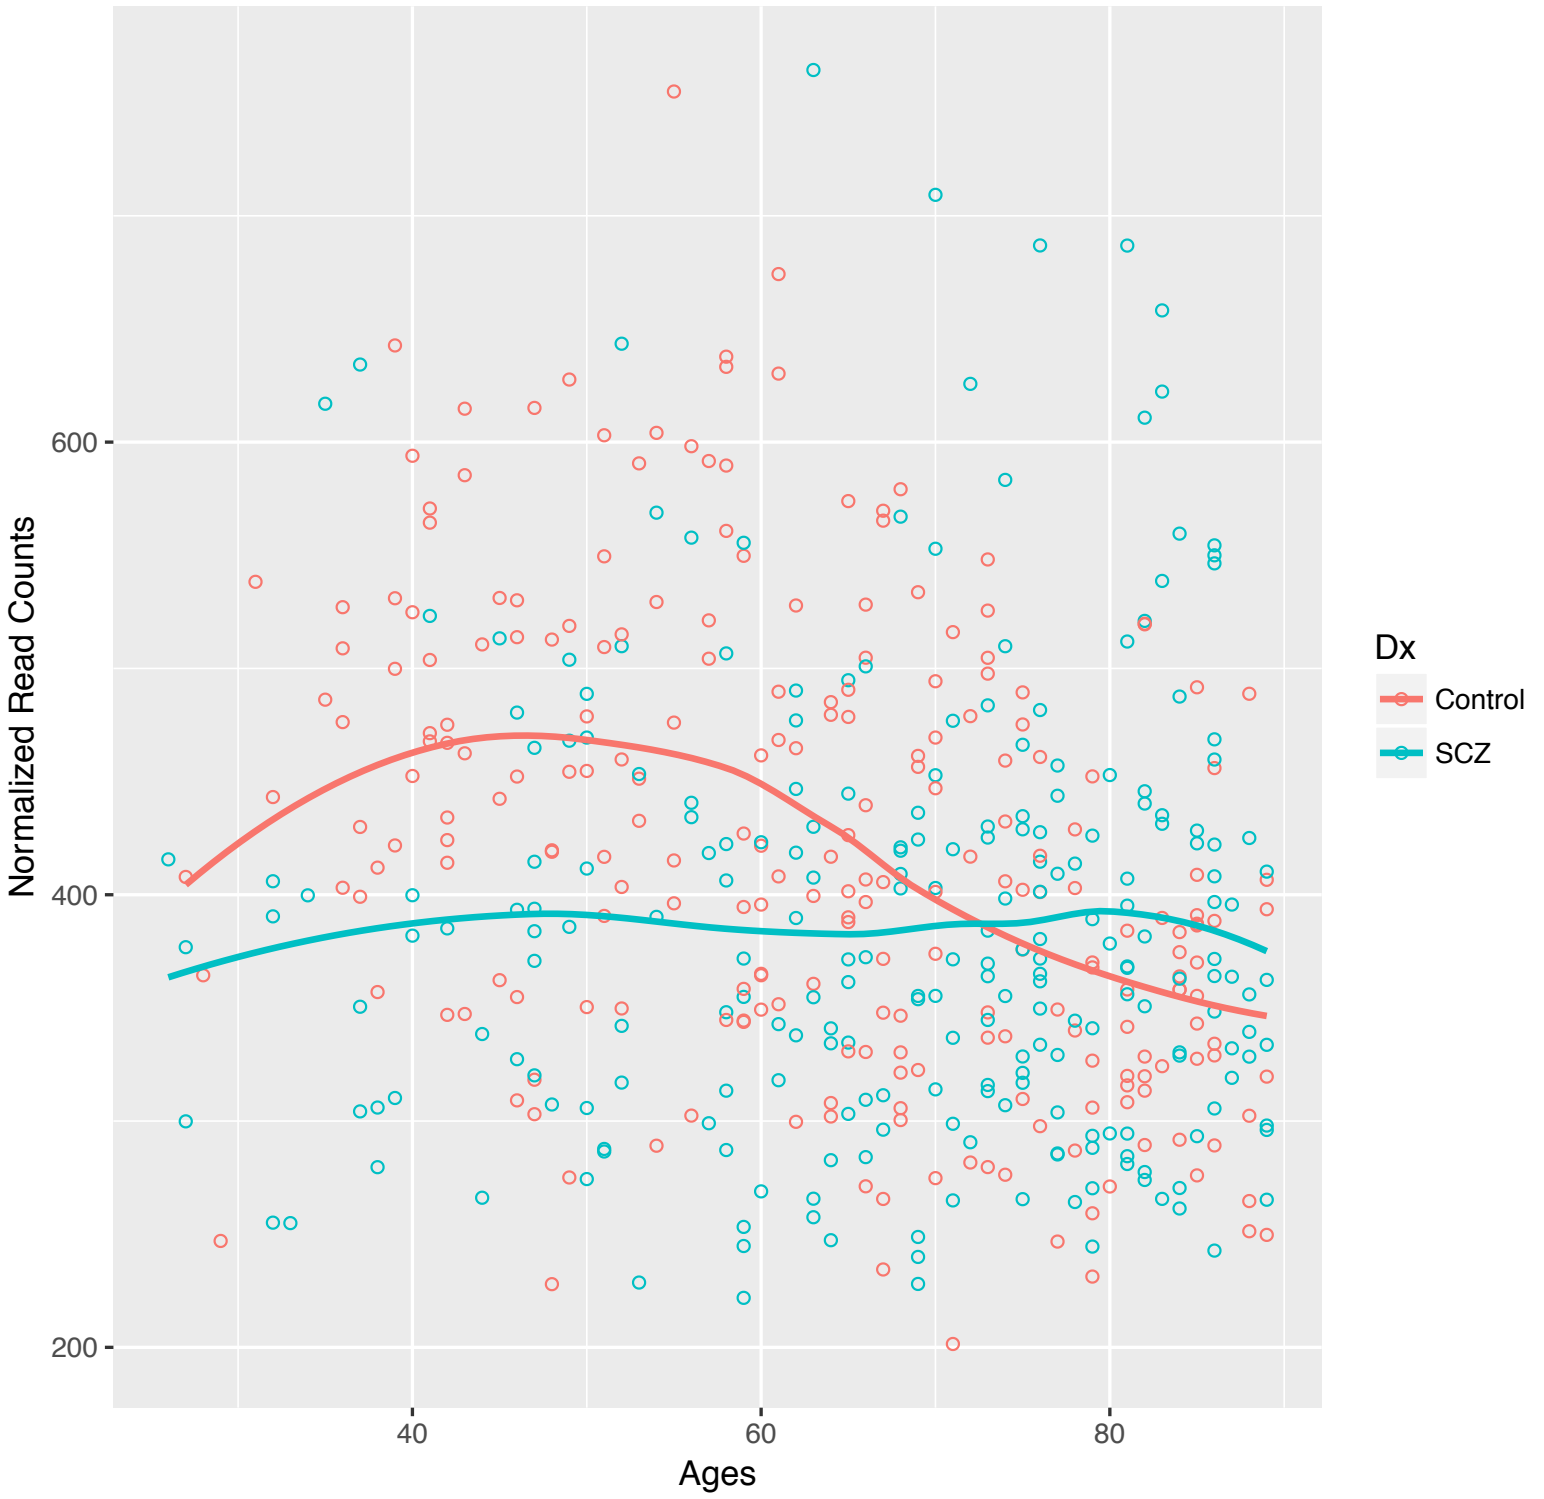

# TRMT11

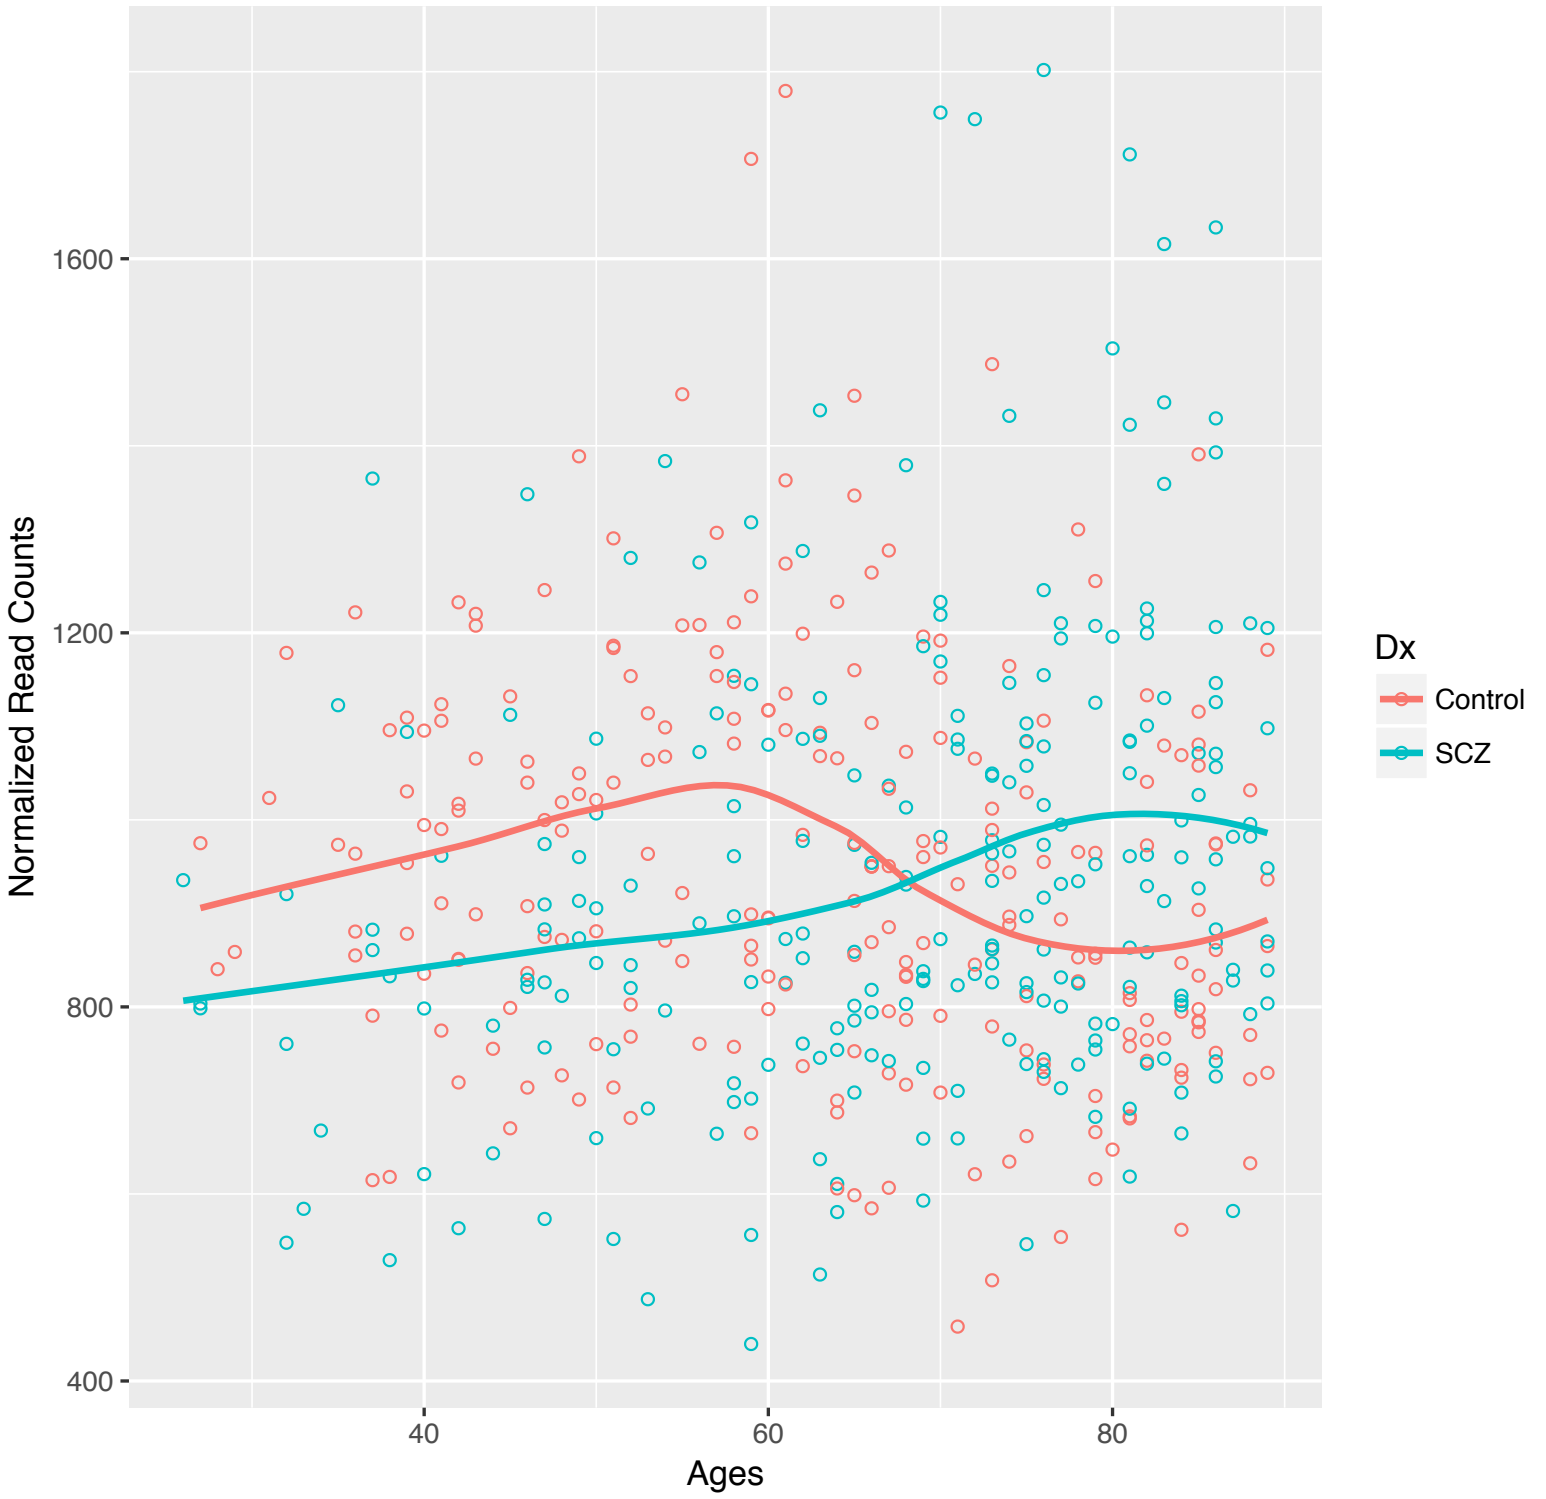

SLC47A2

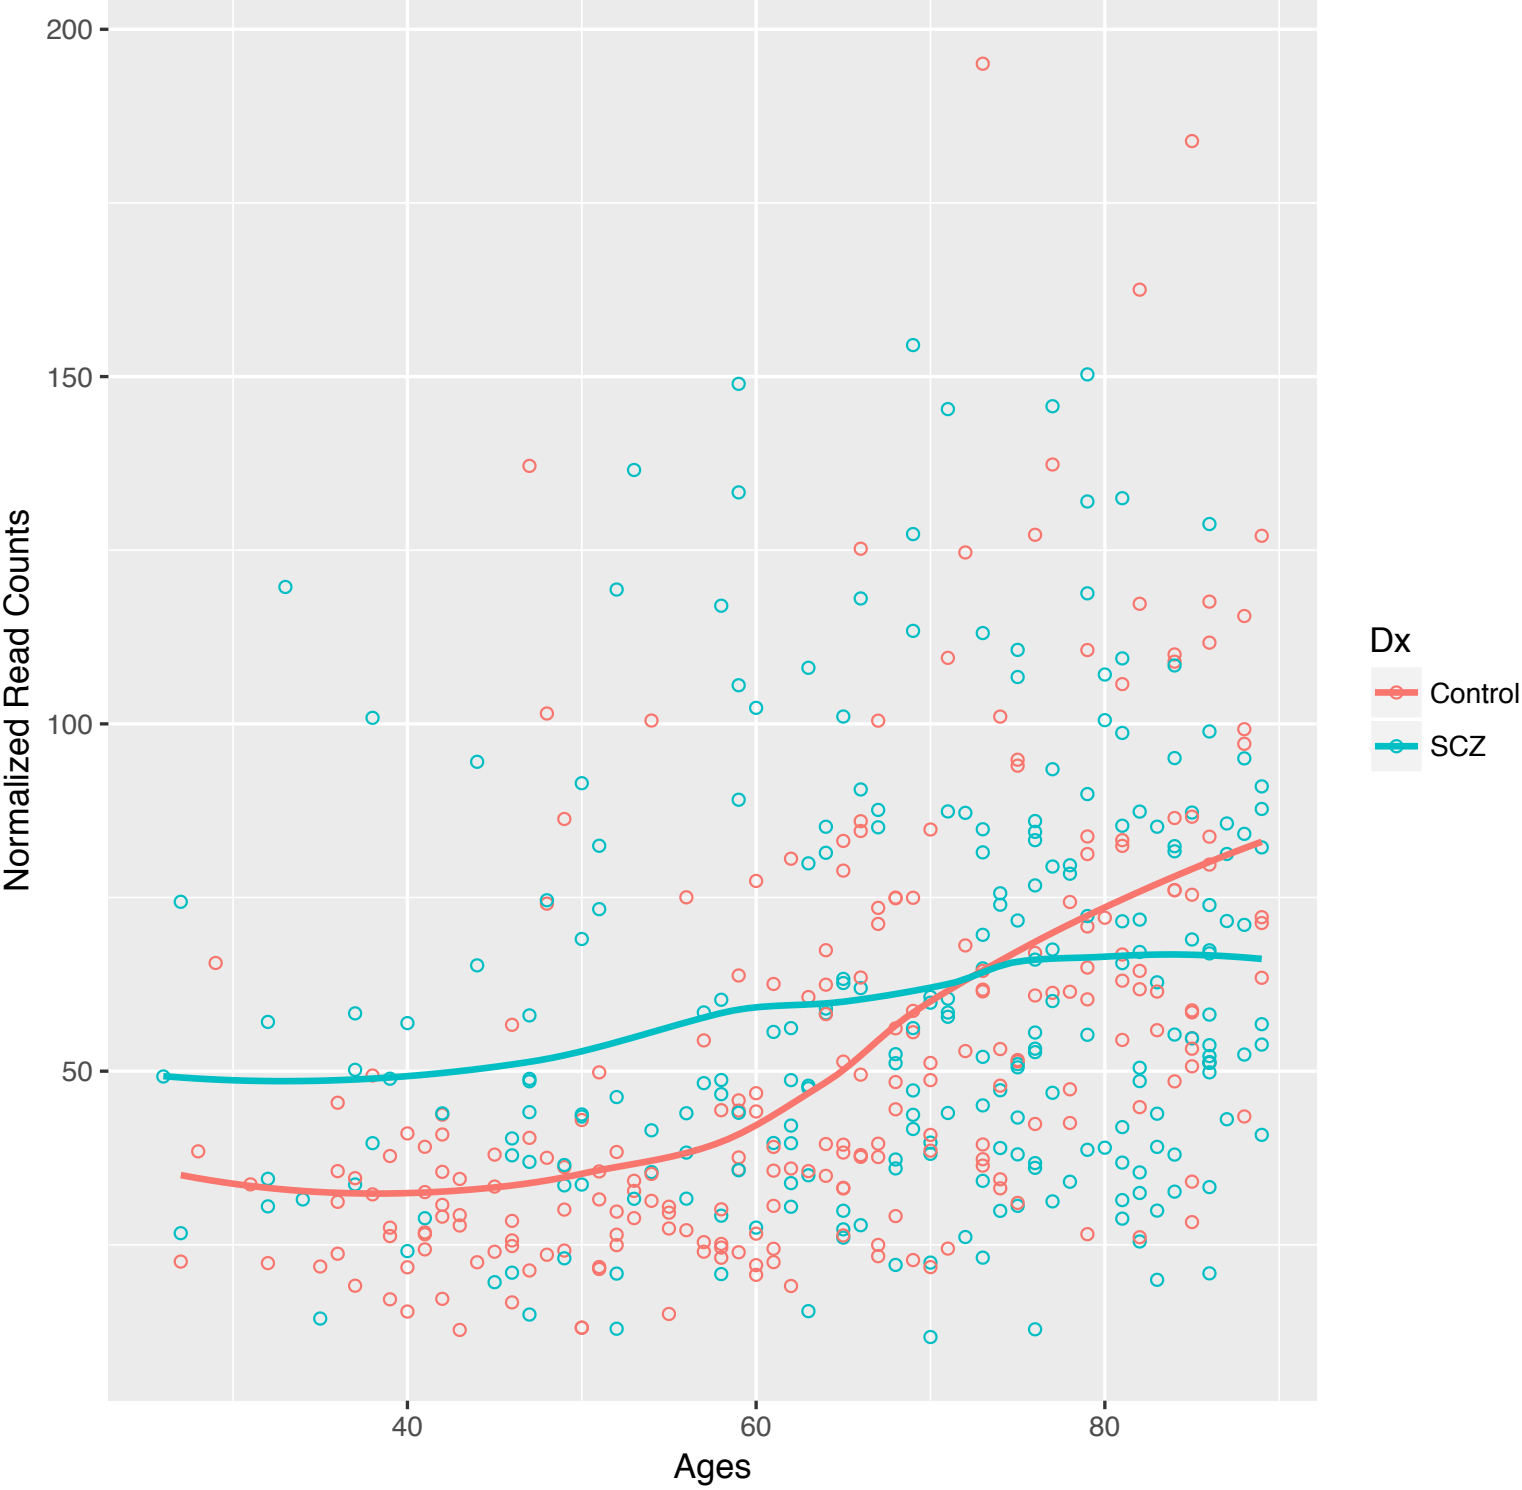

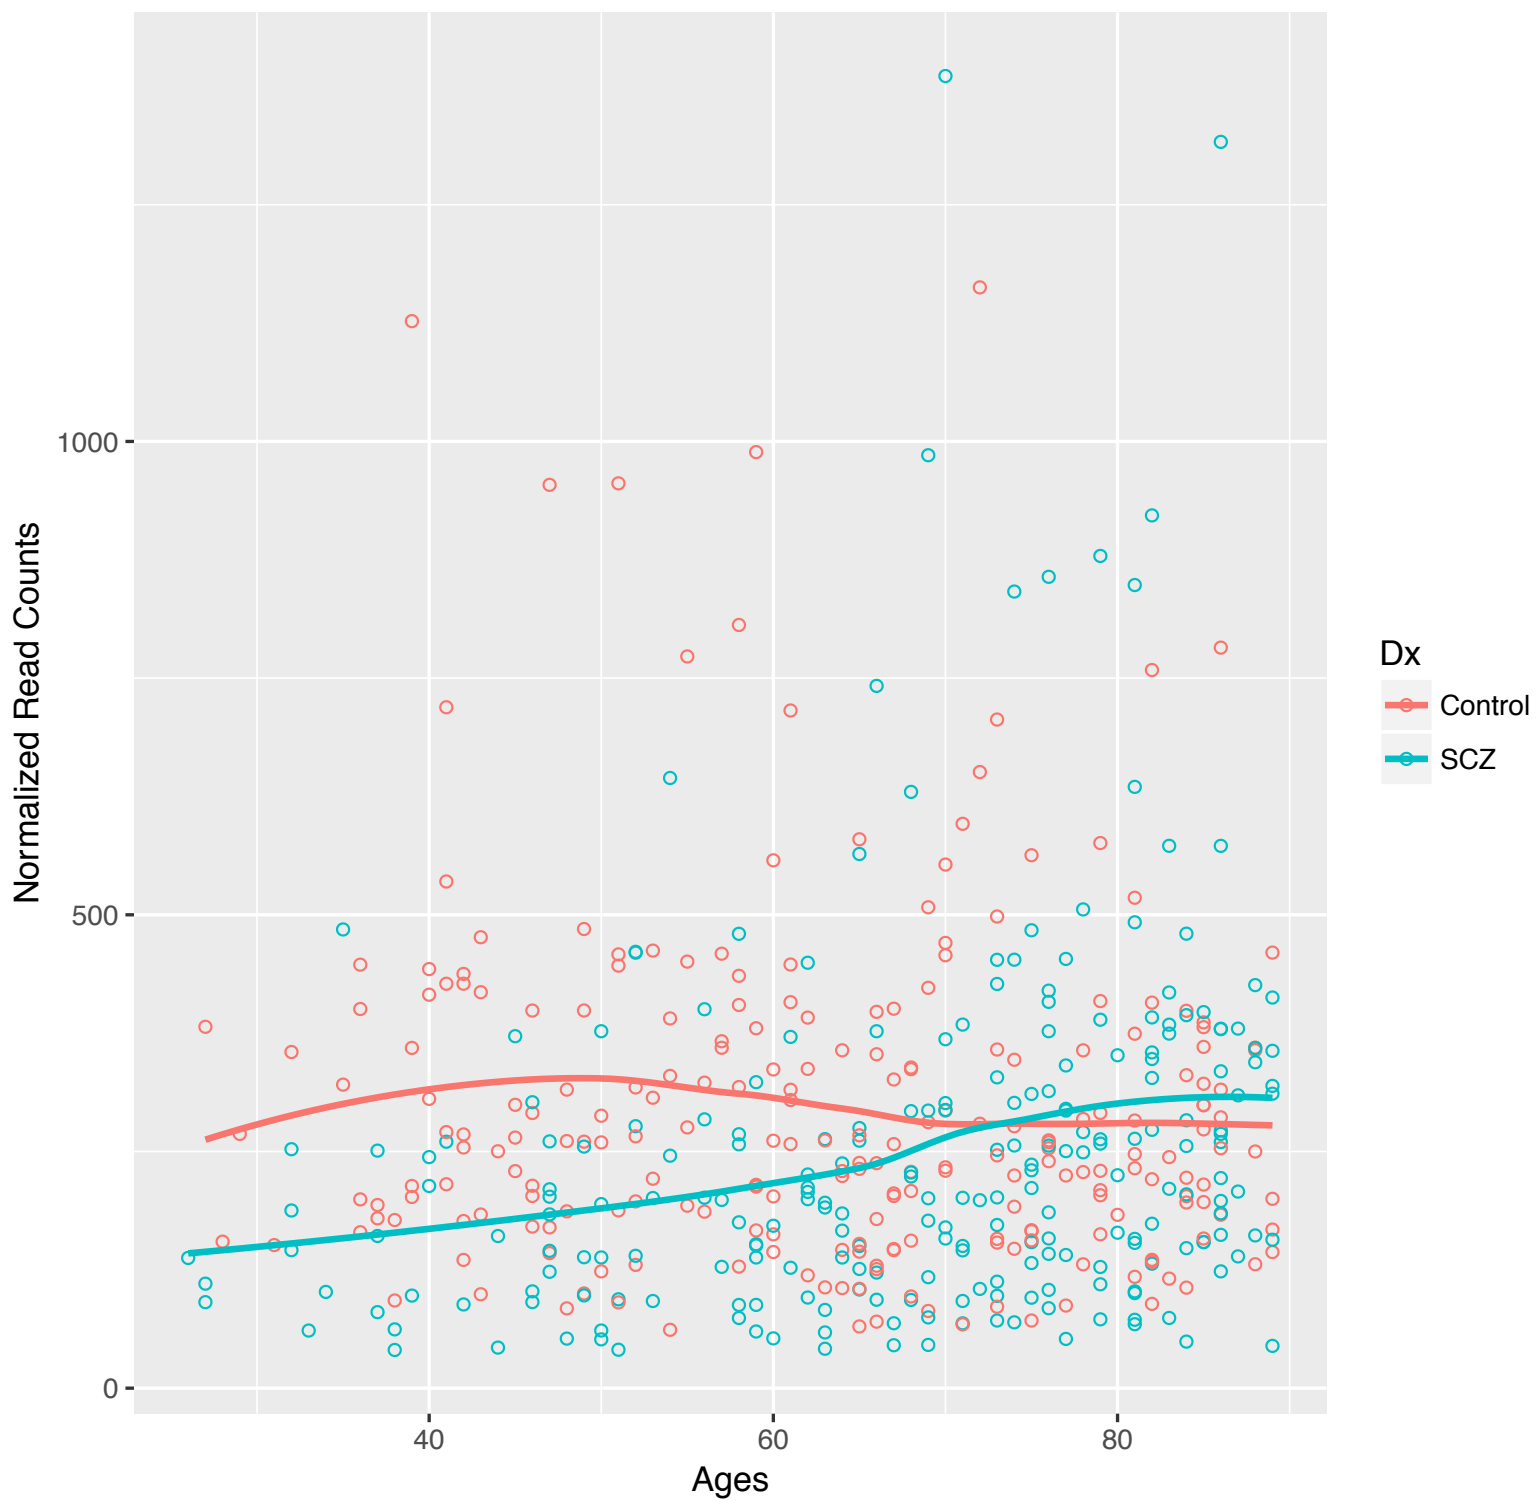

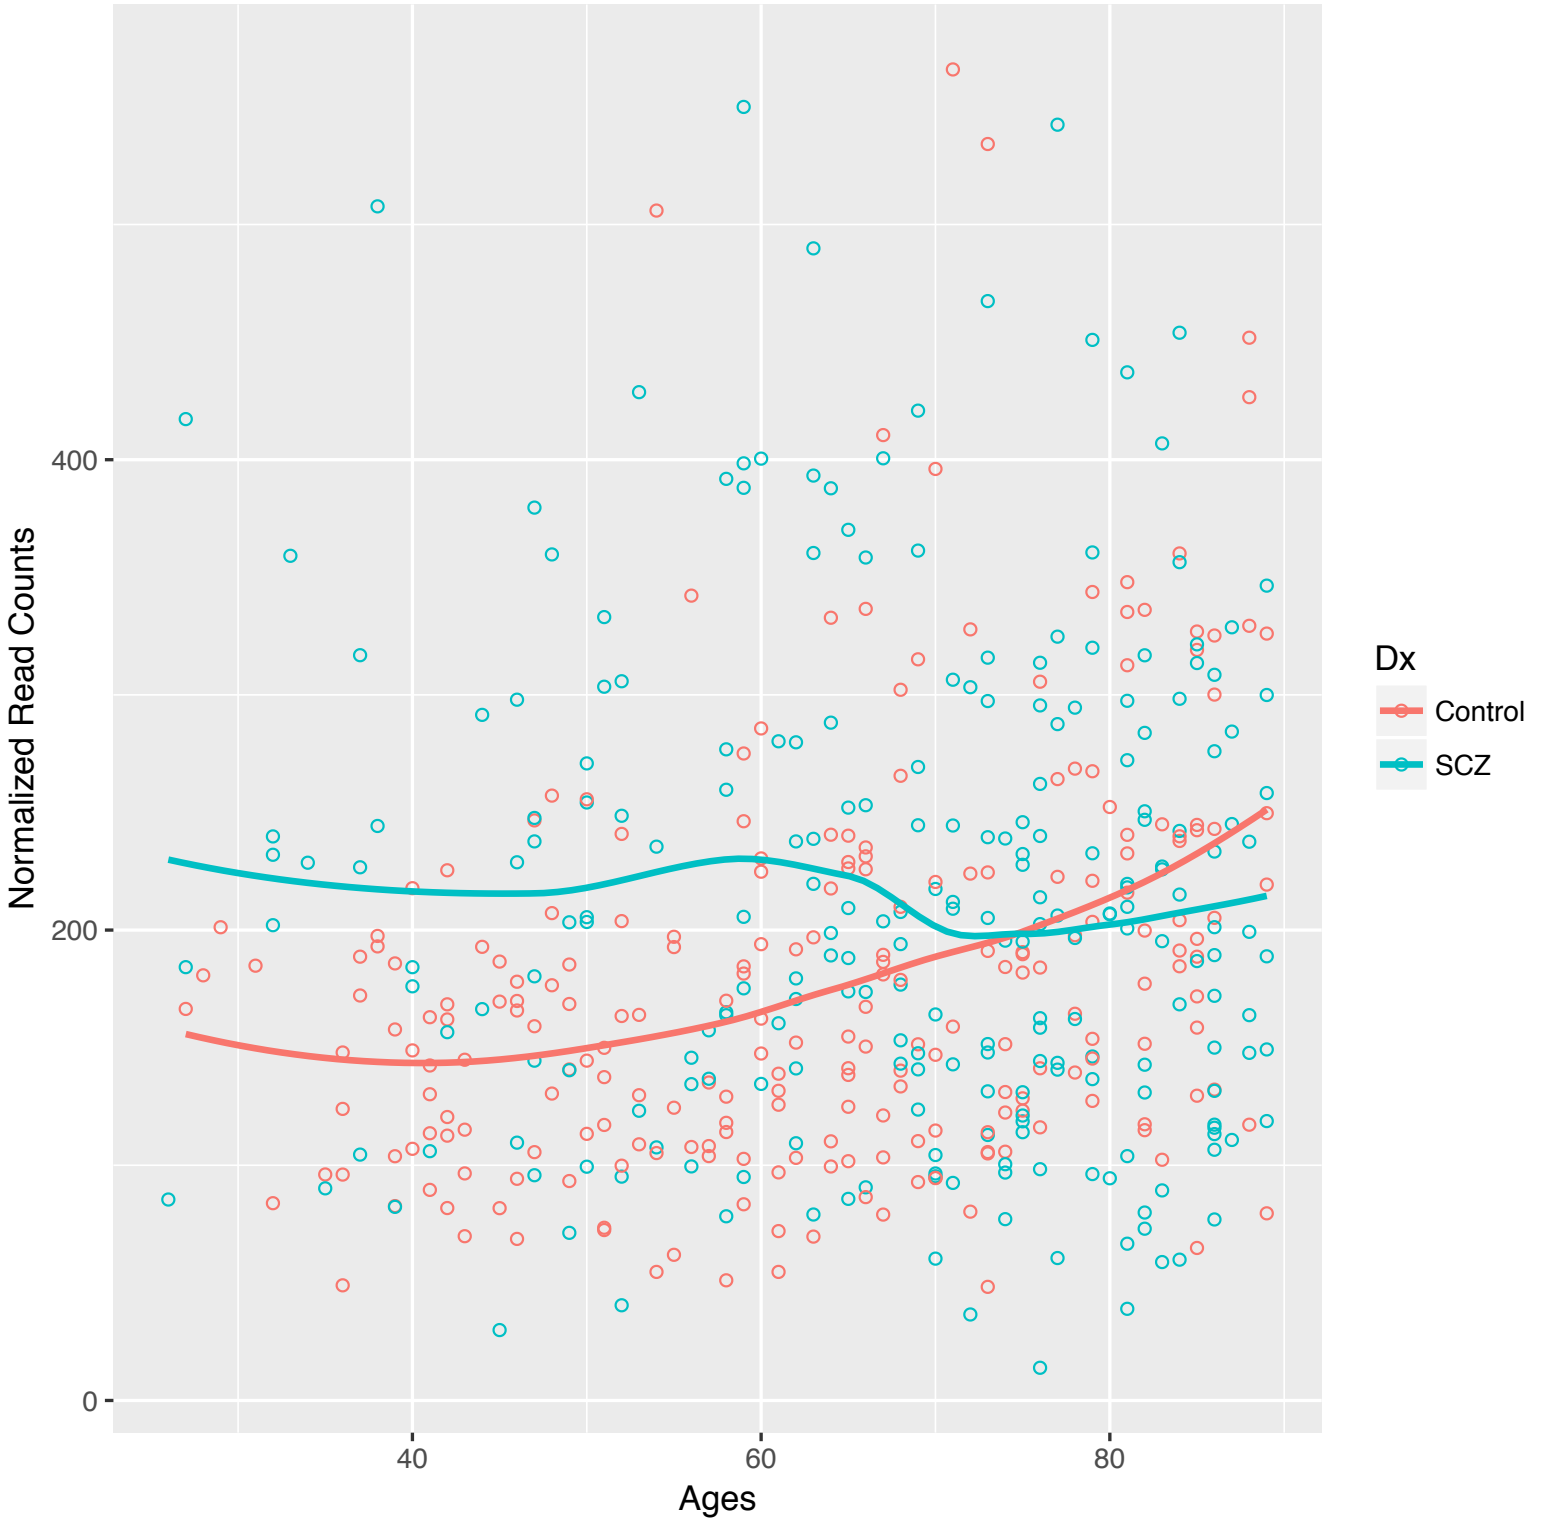

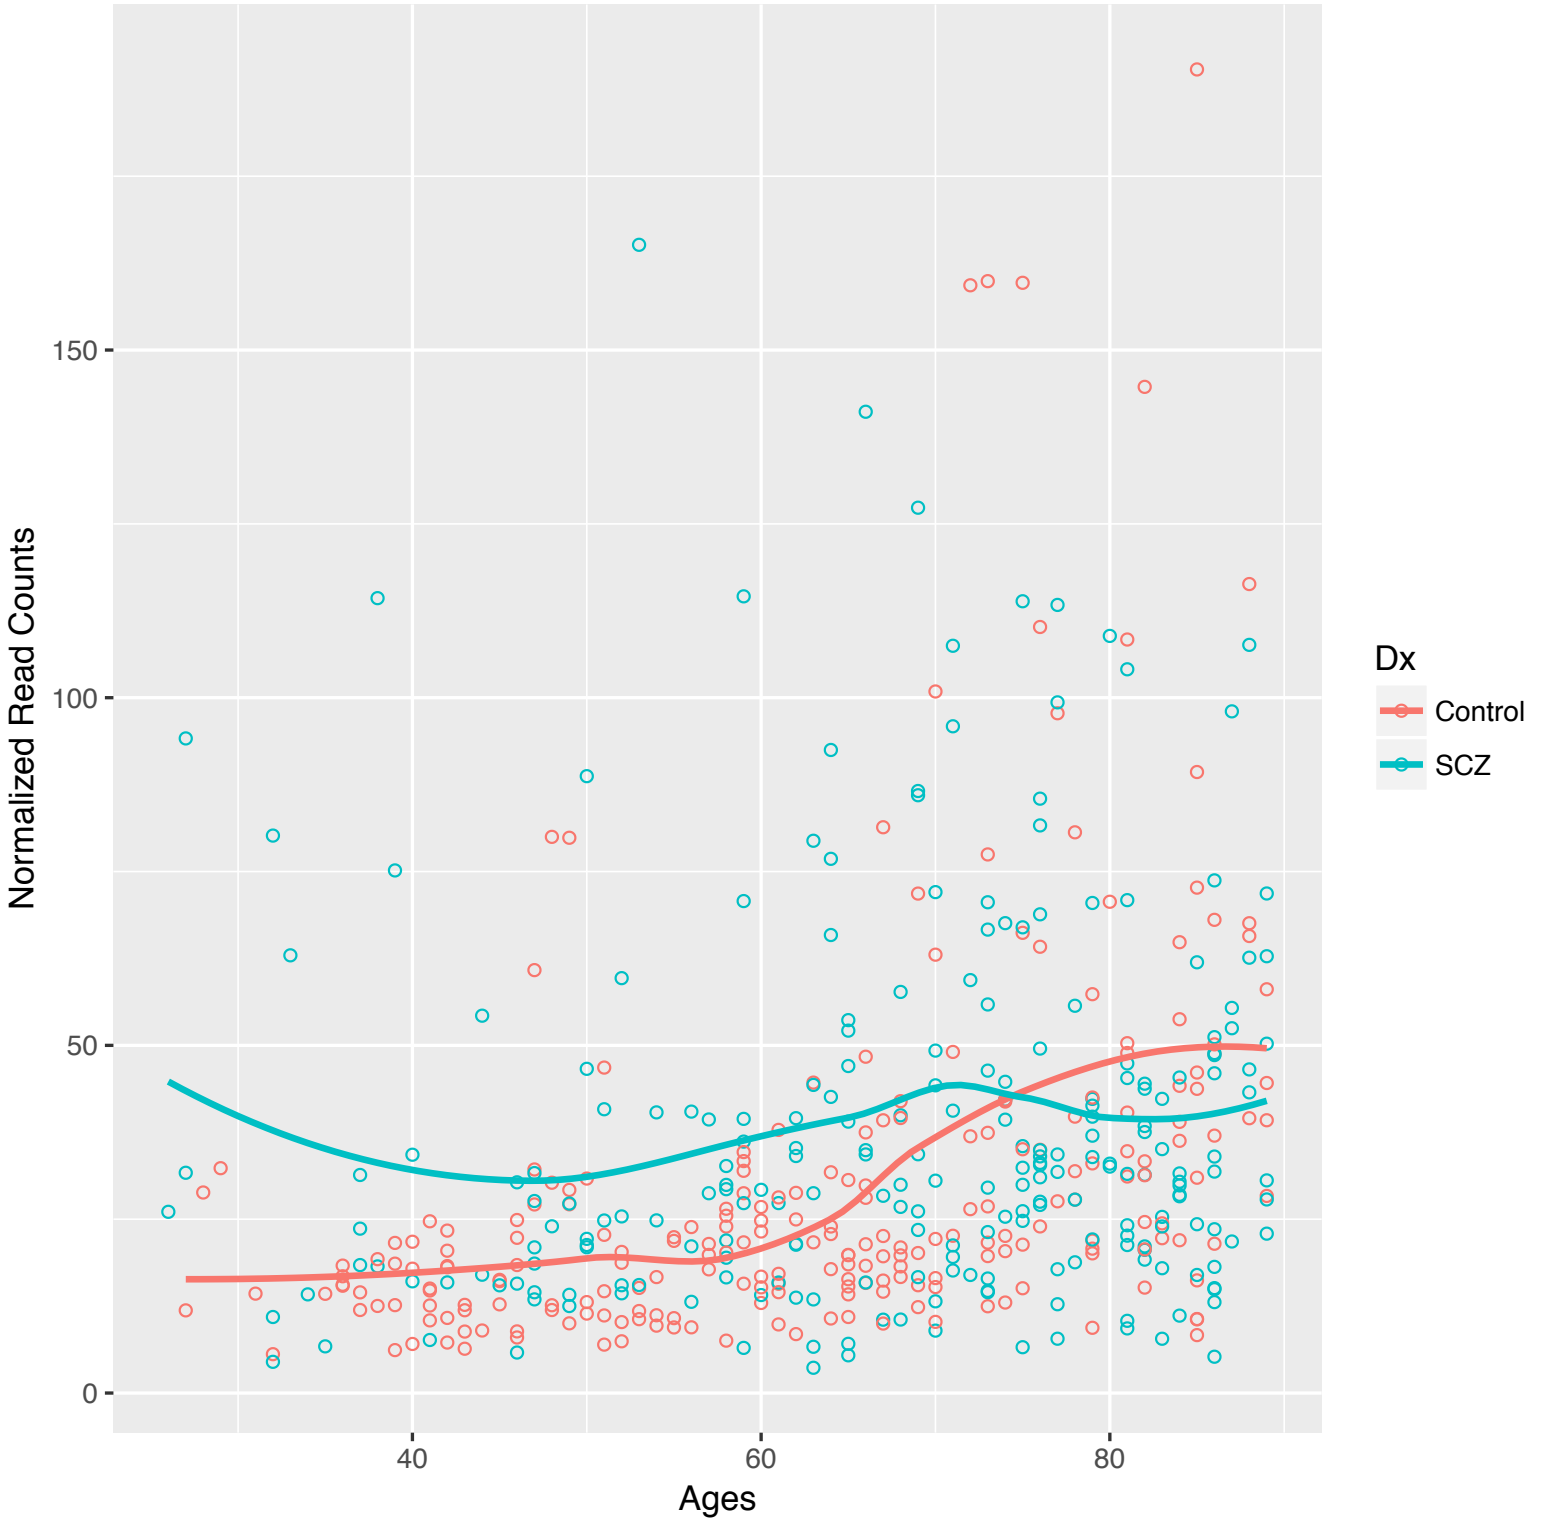

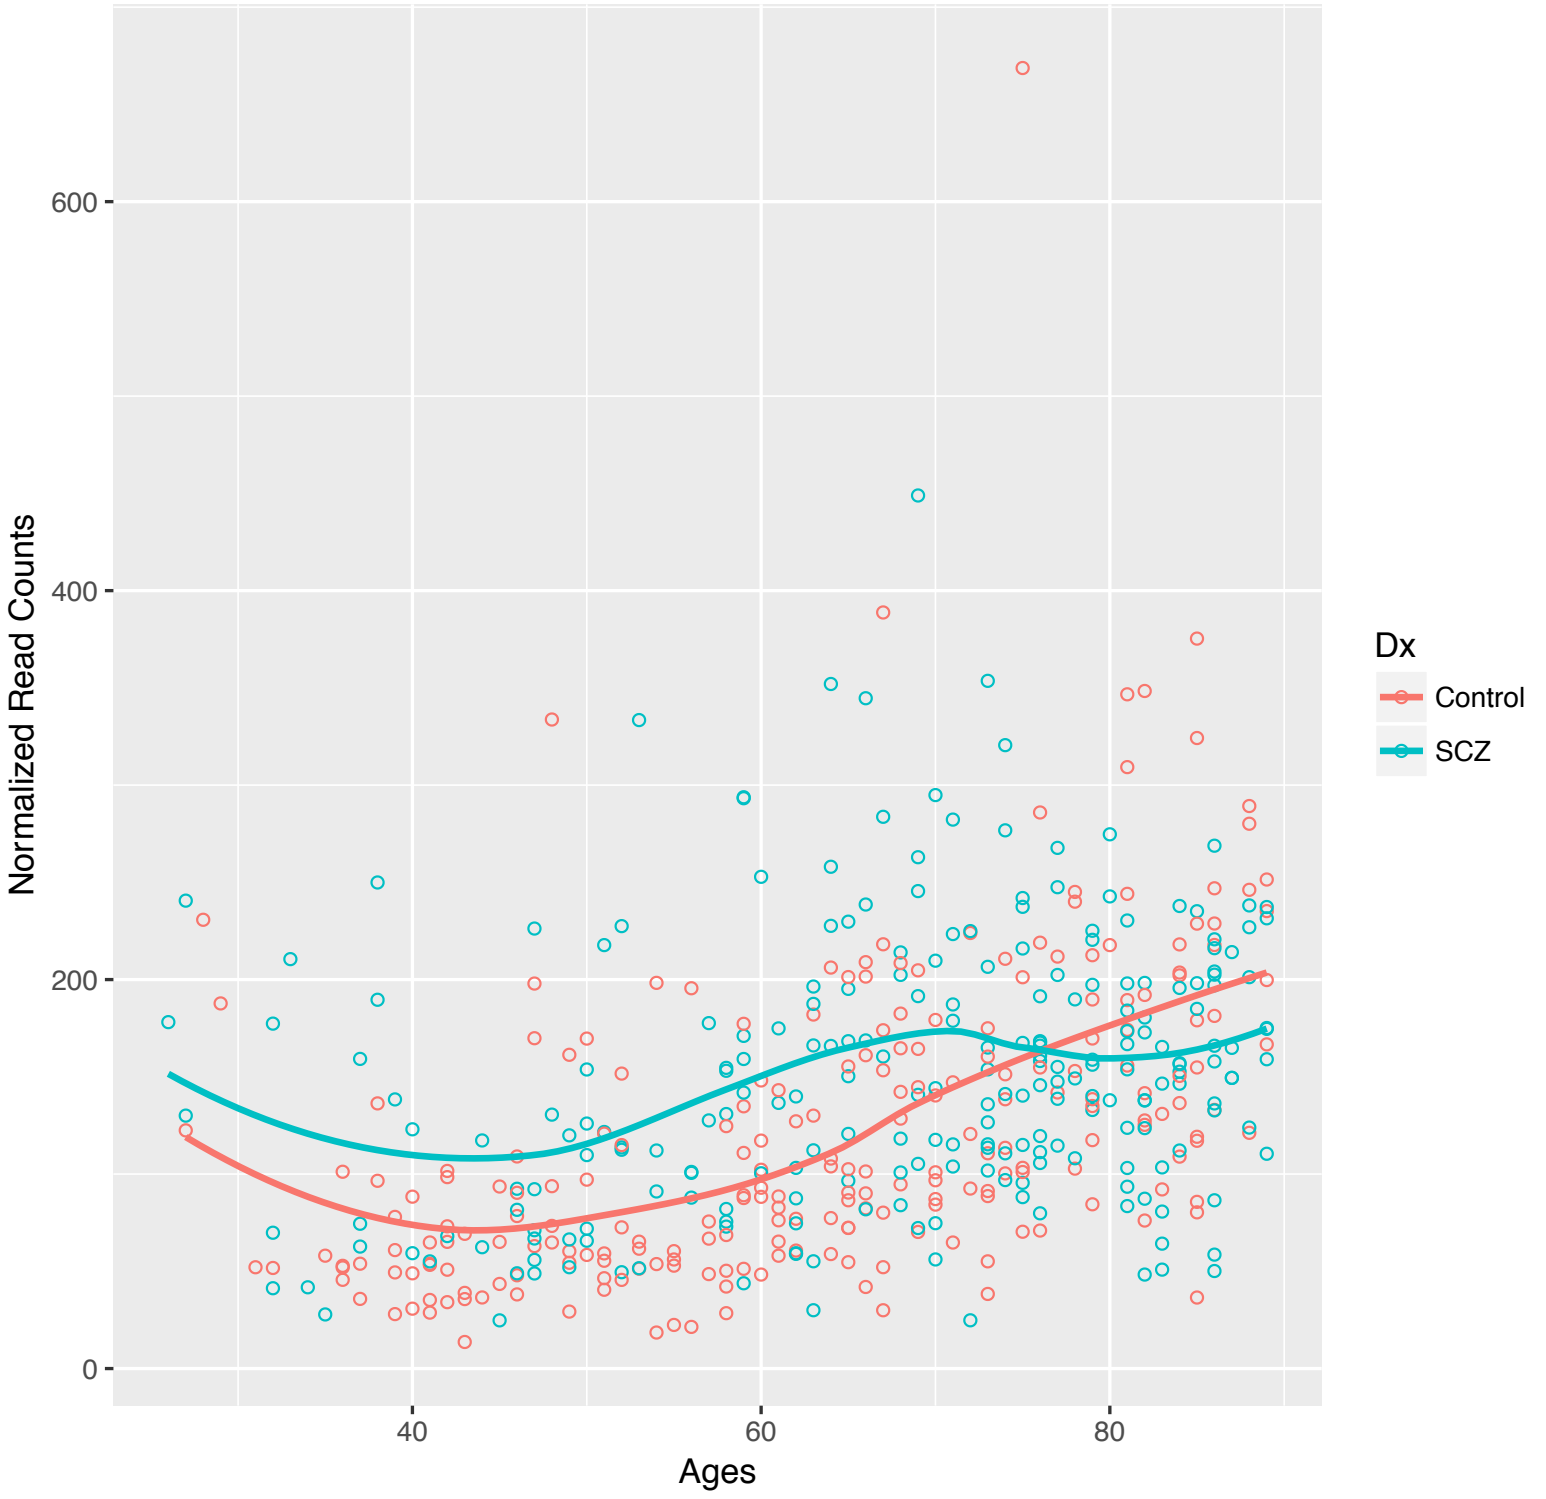



# GNB3

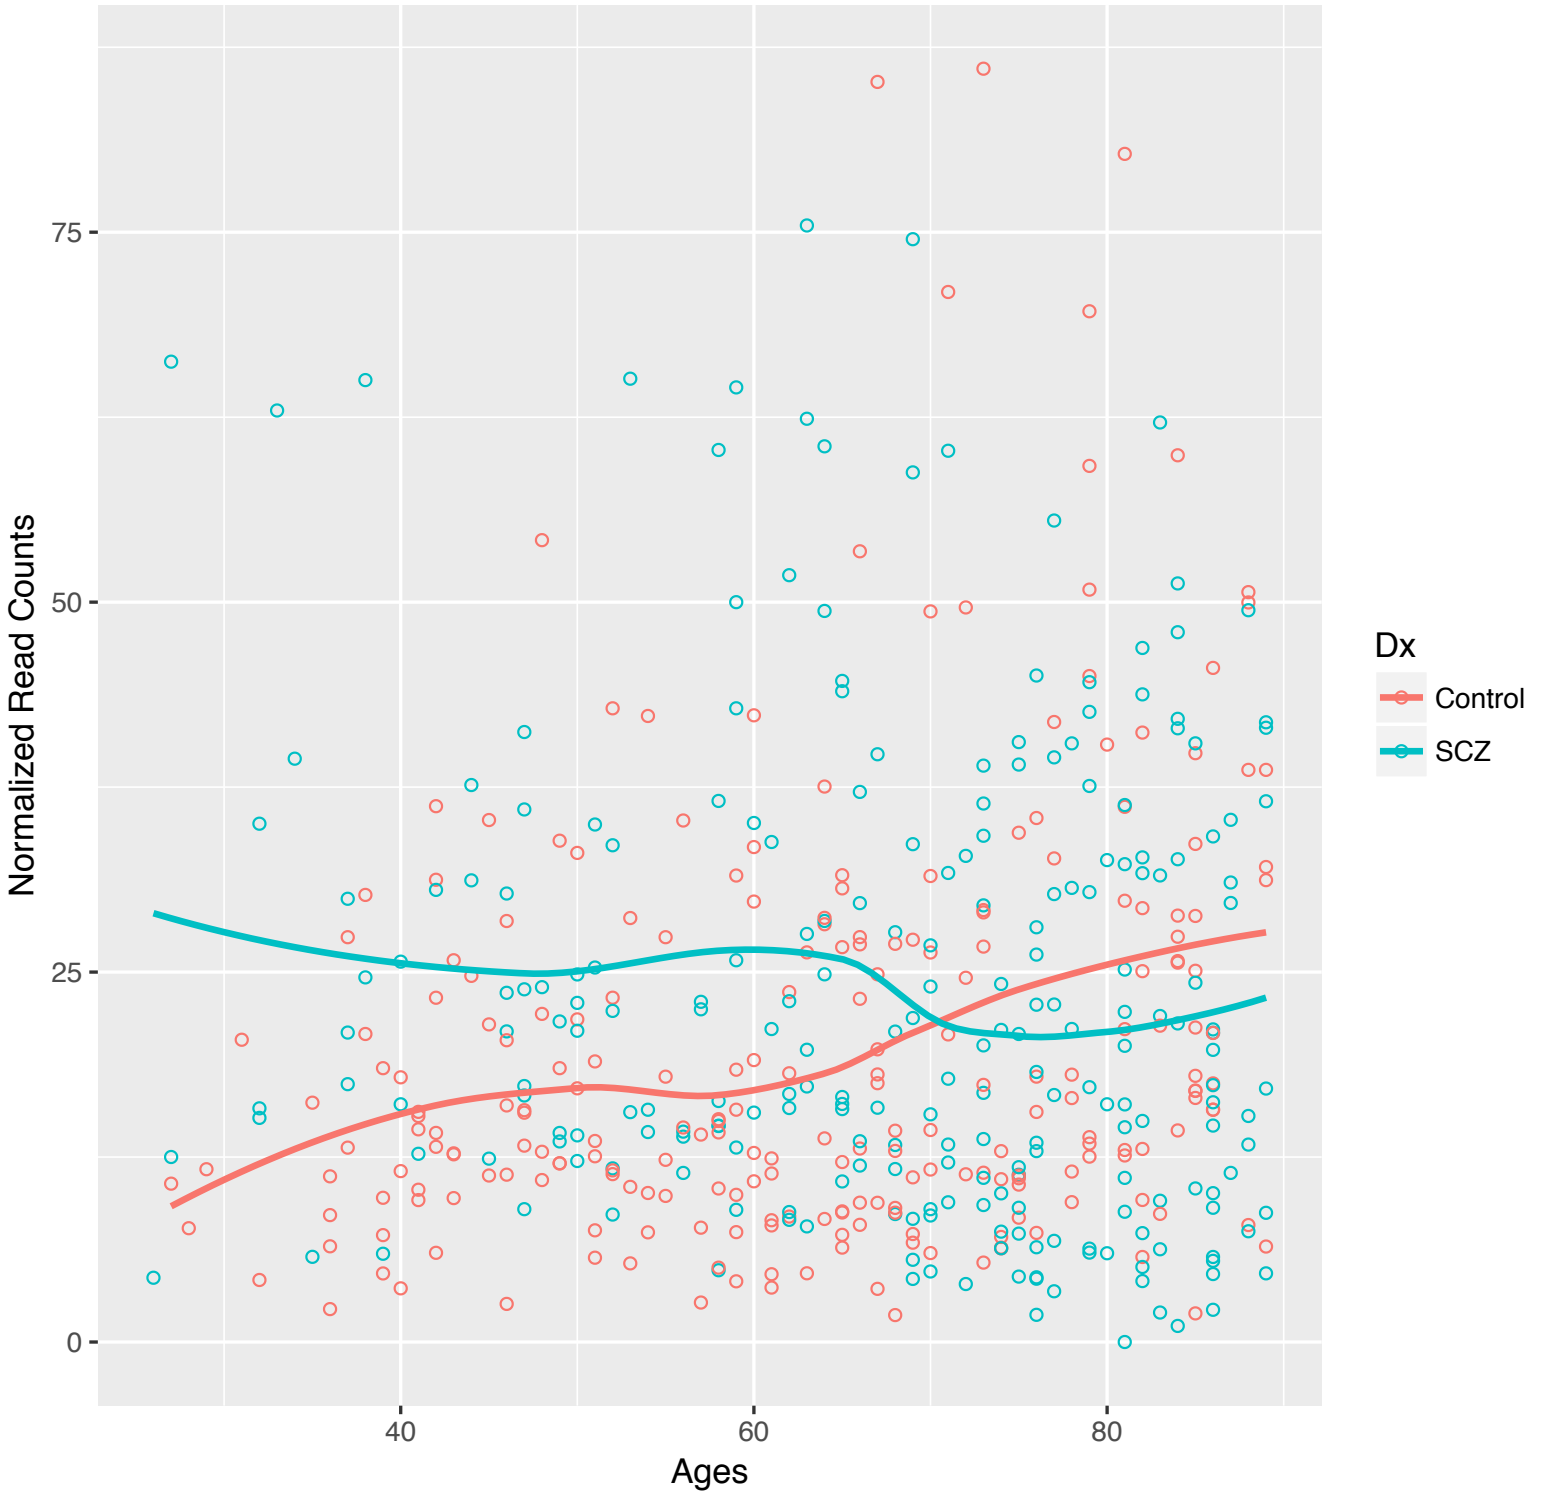

# MLKL

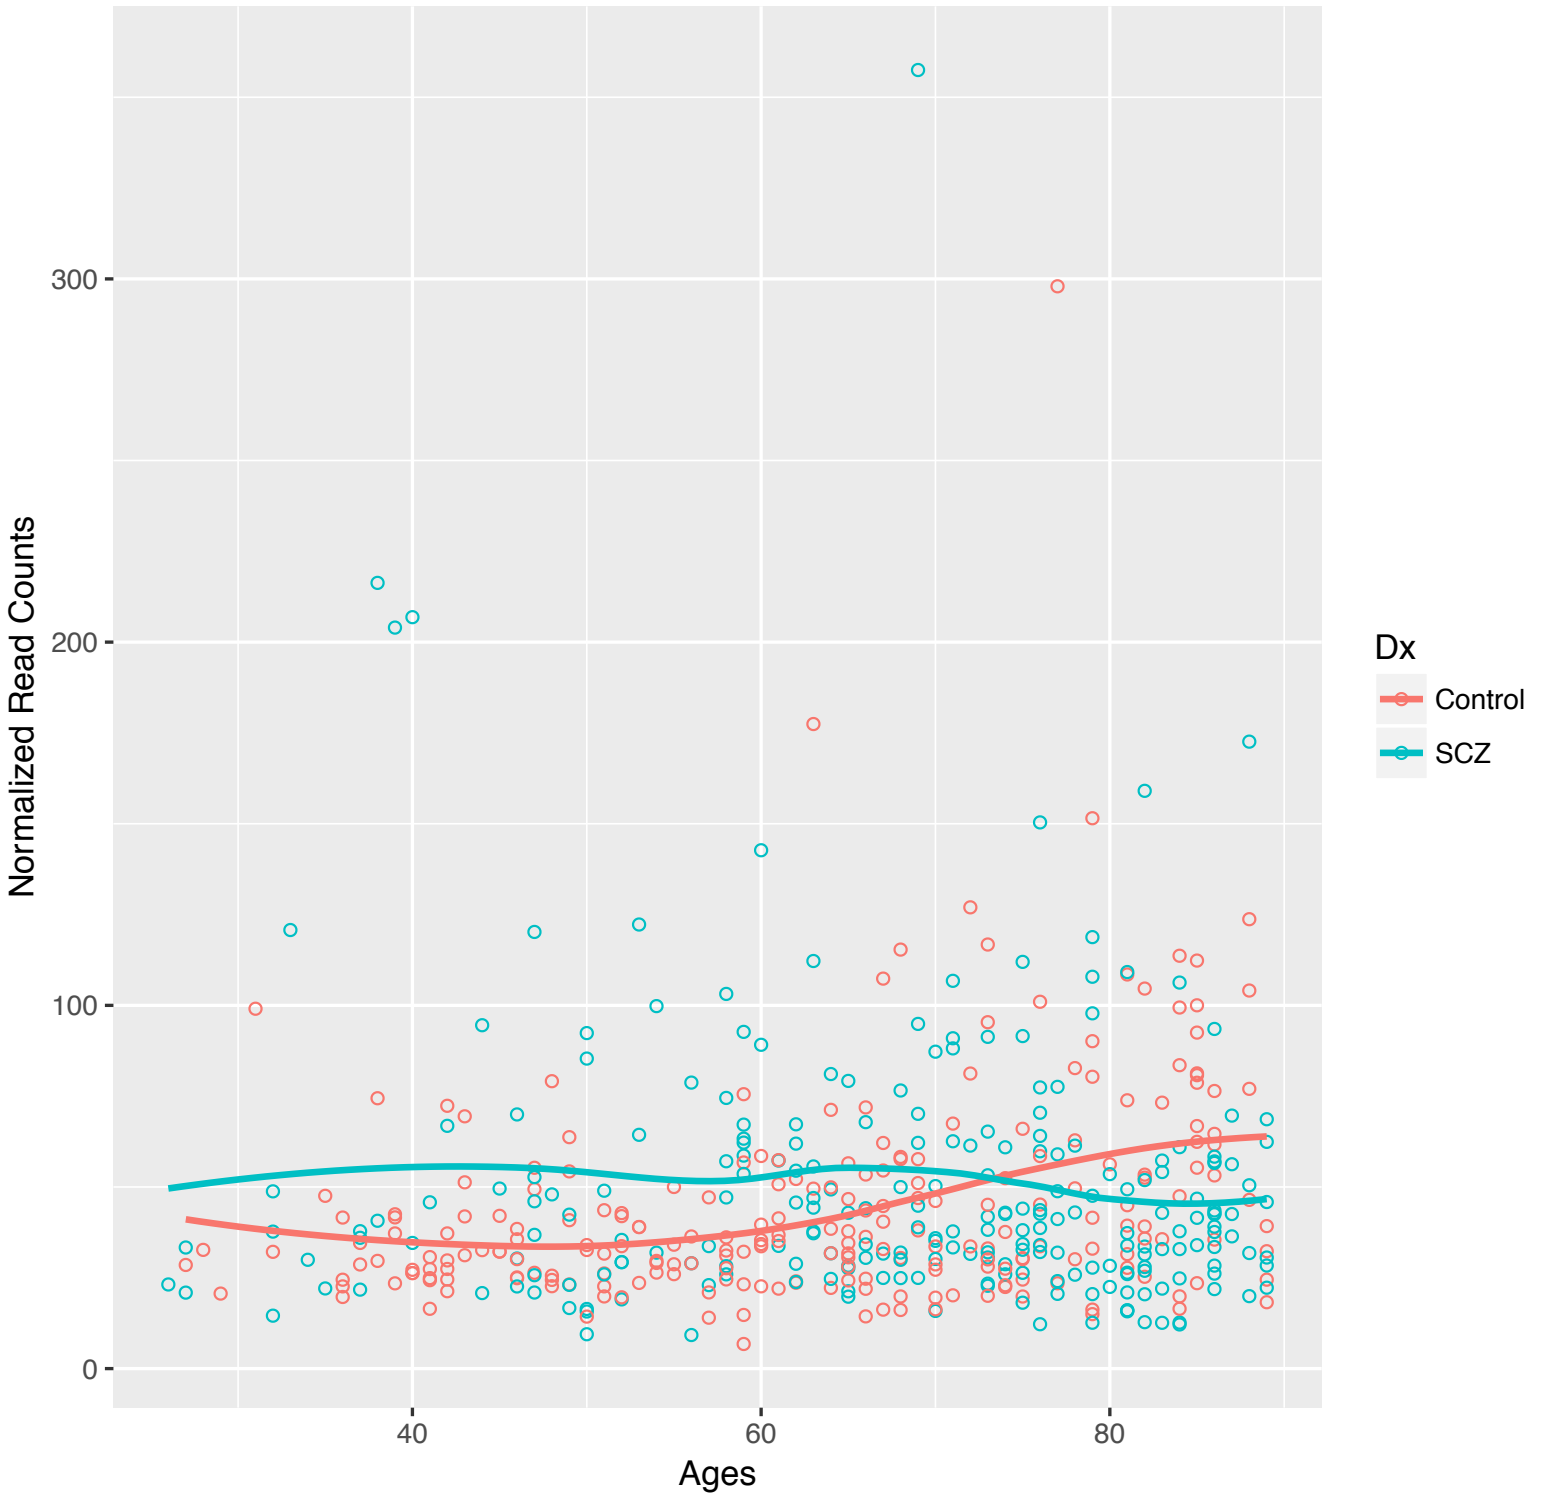

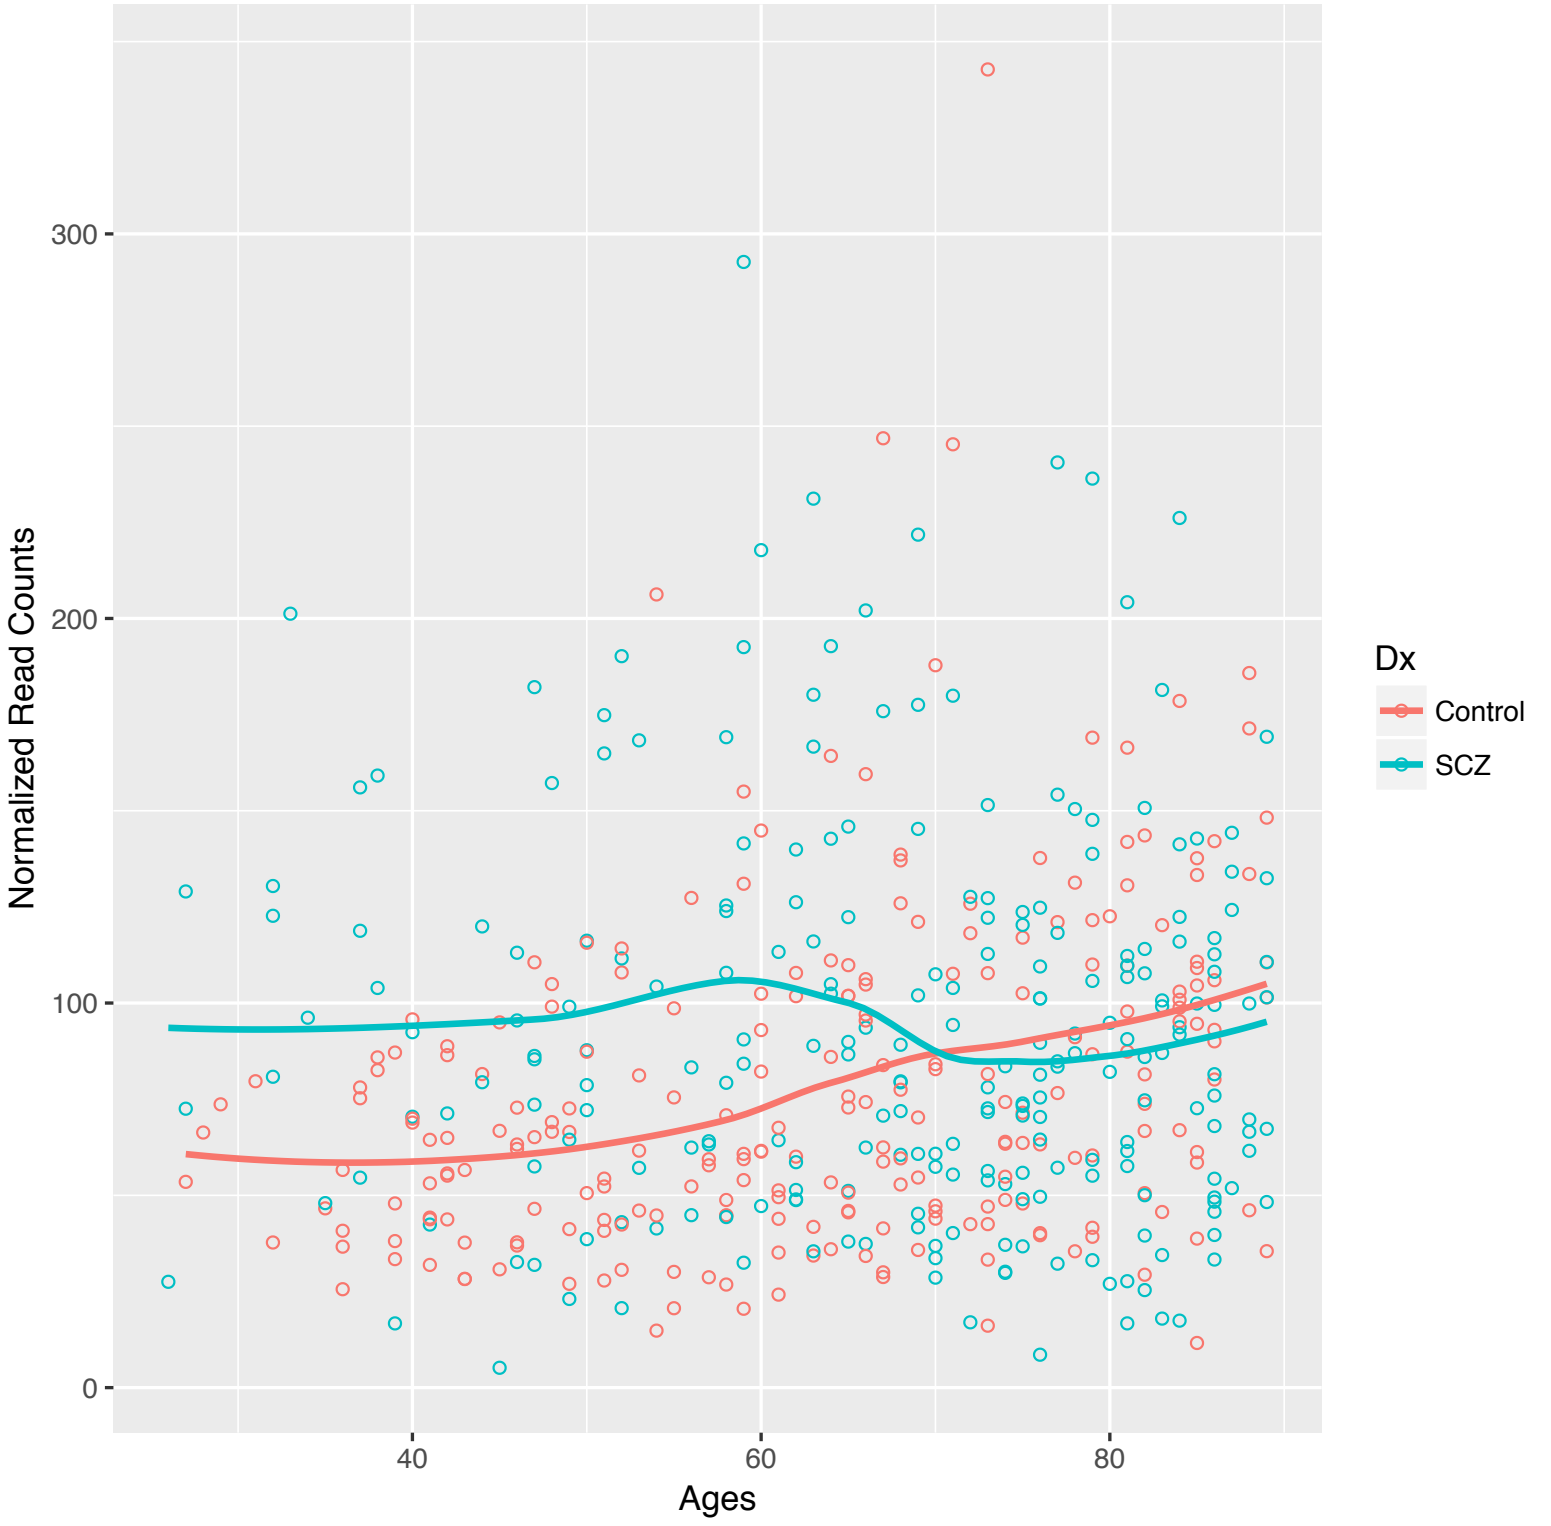

# PKP4-AS1

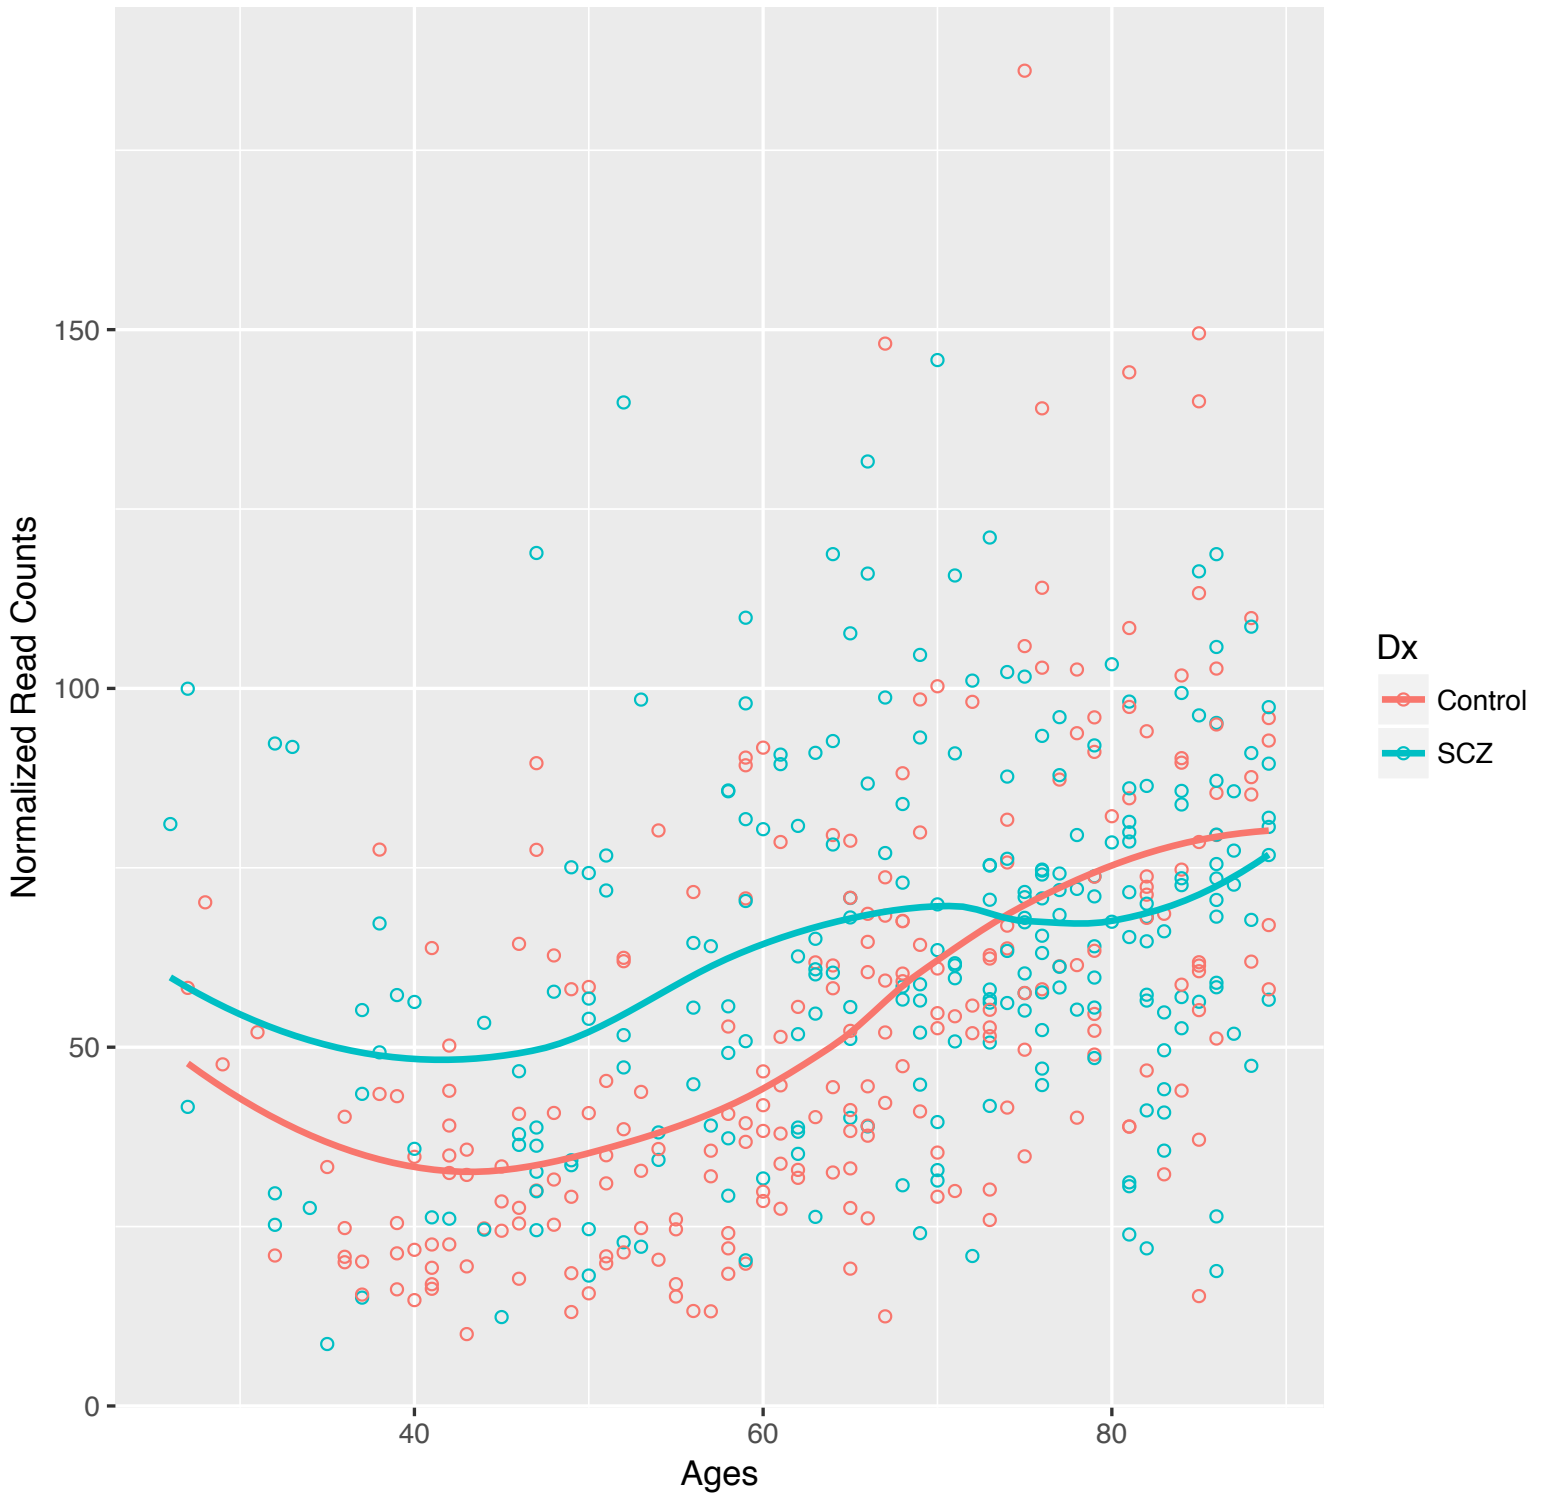

# PTS

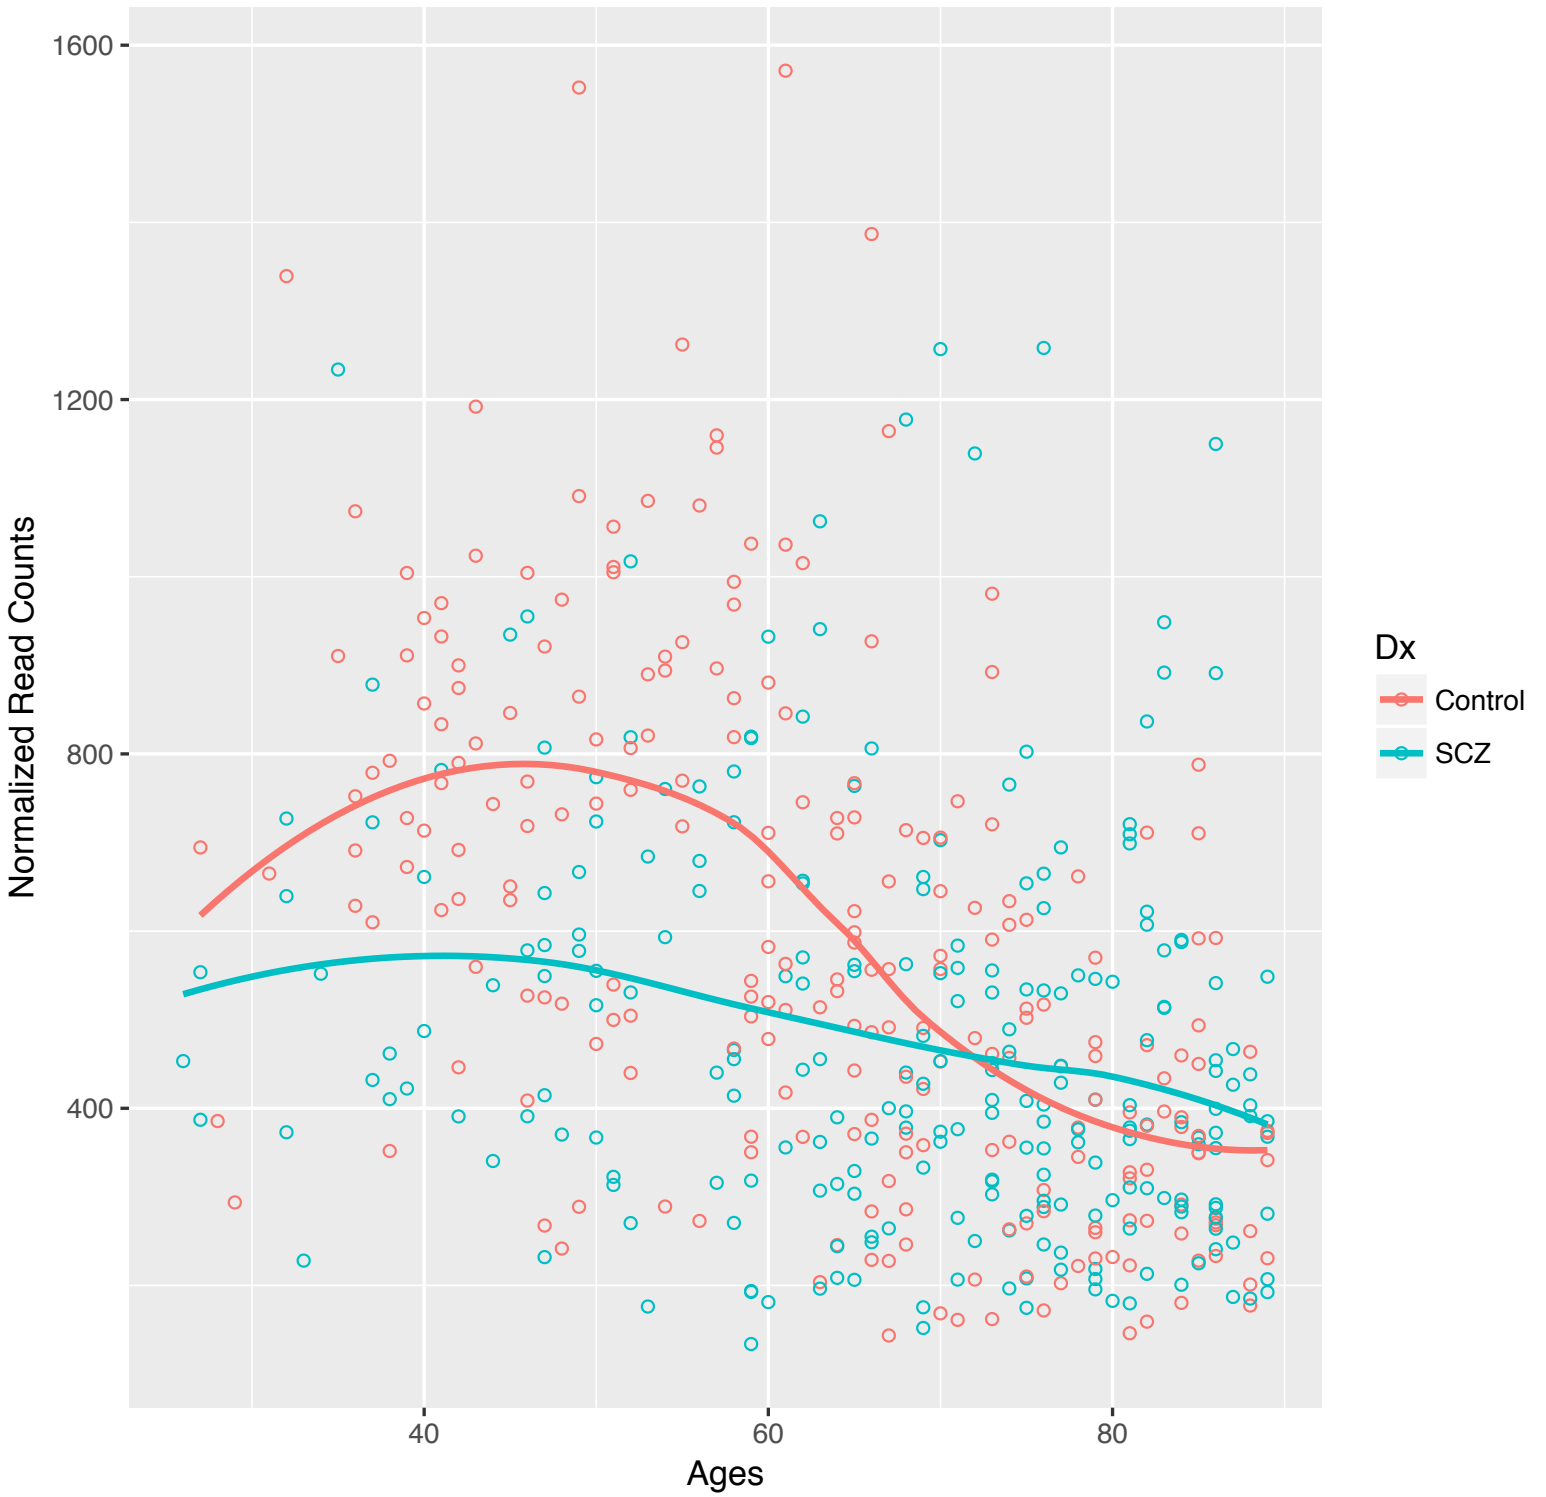

# MIR421

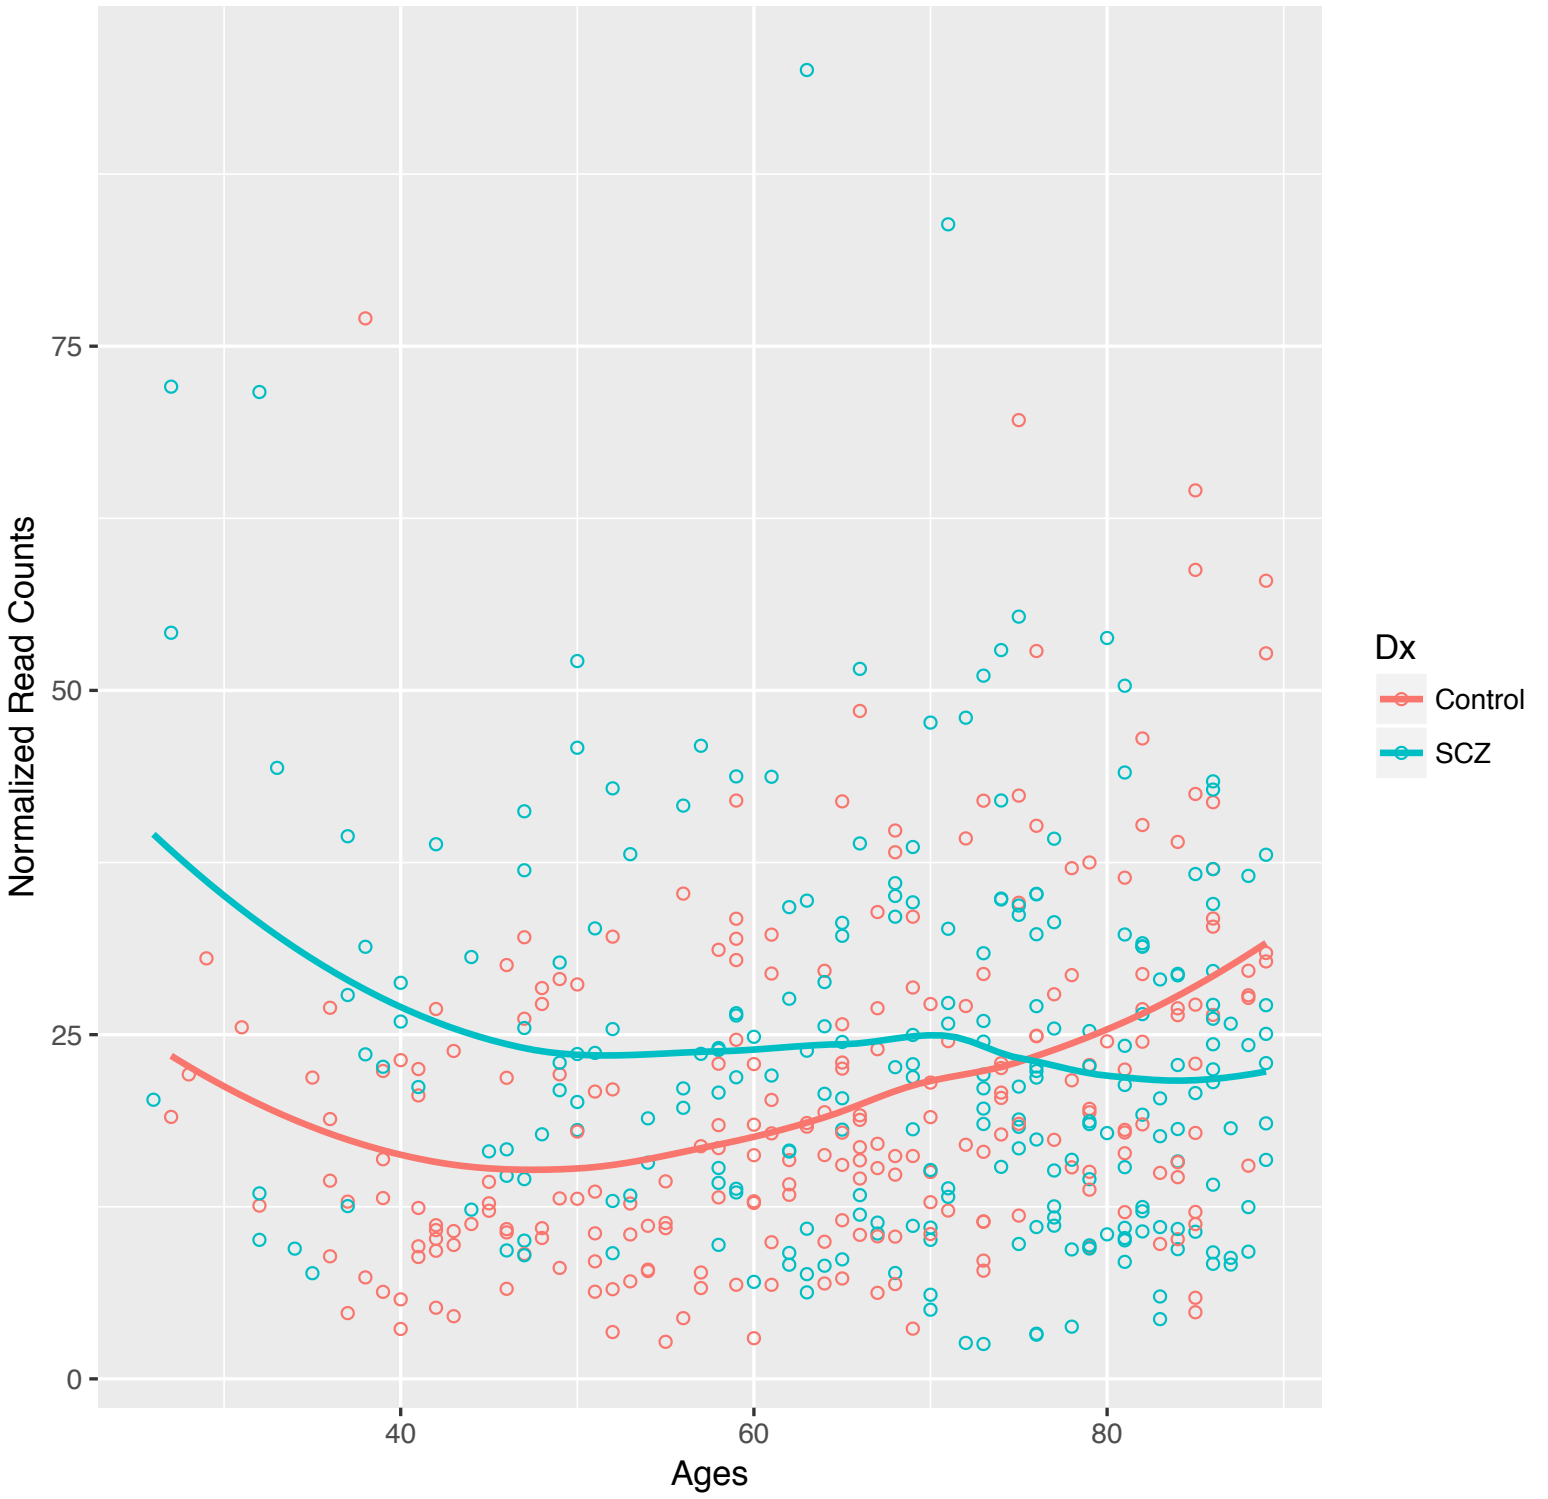

# TMEM240

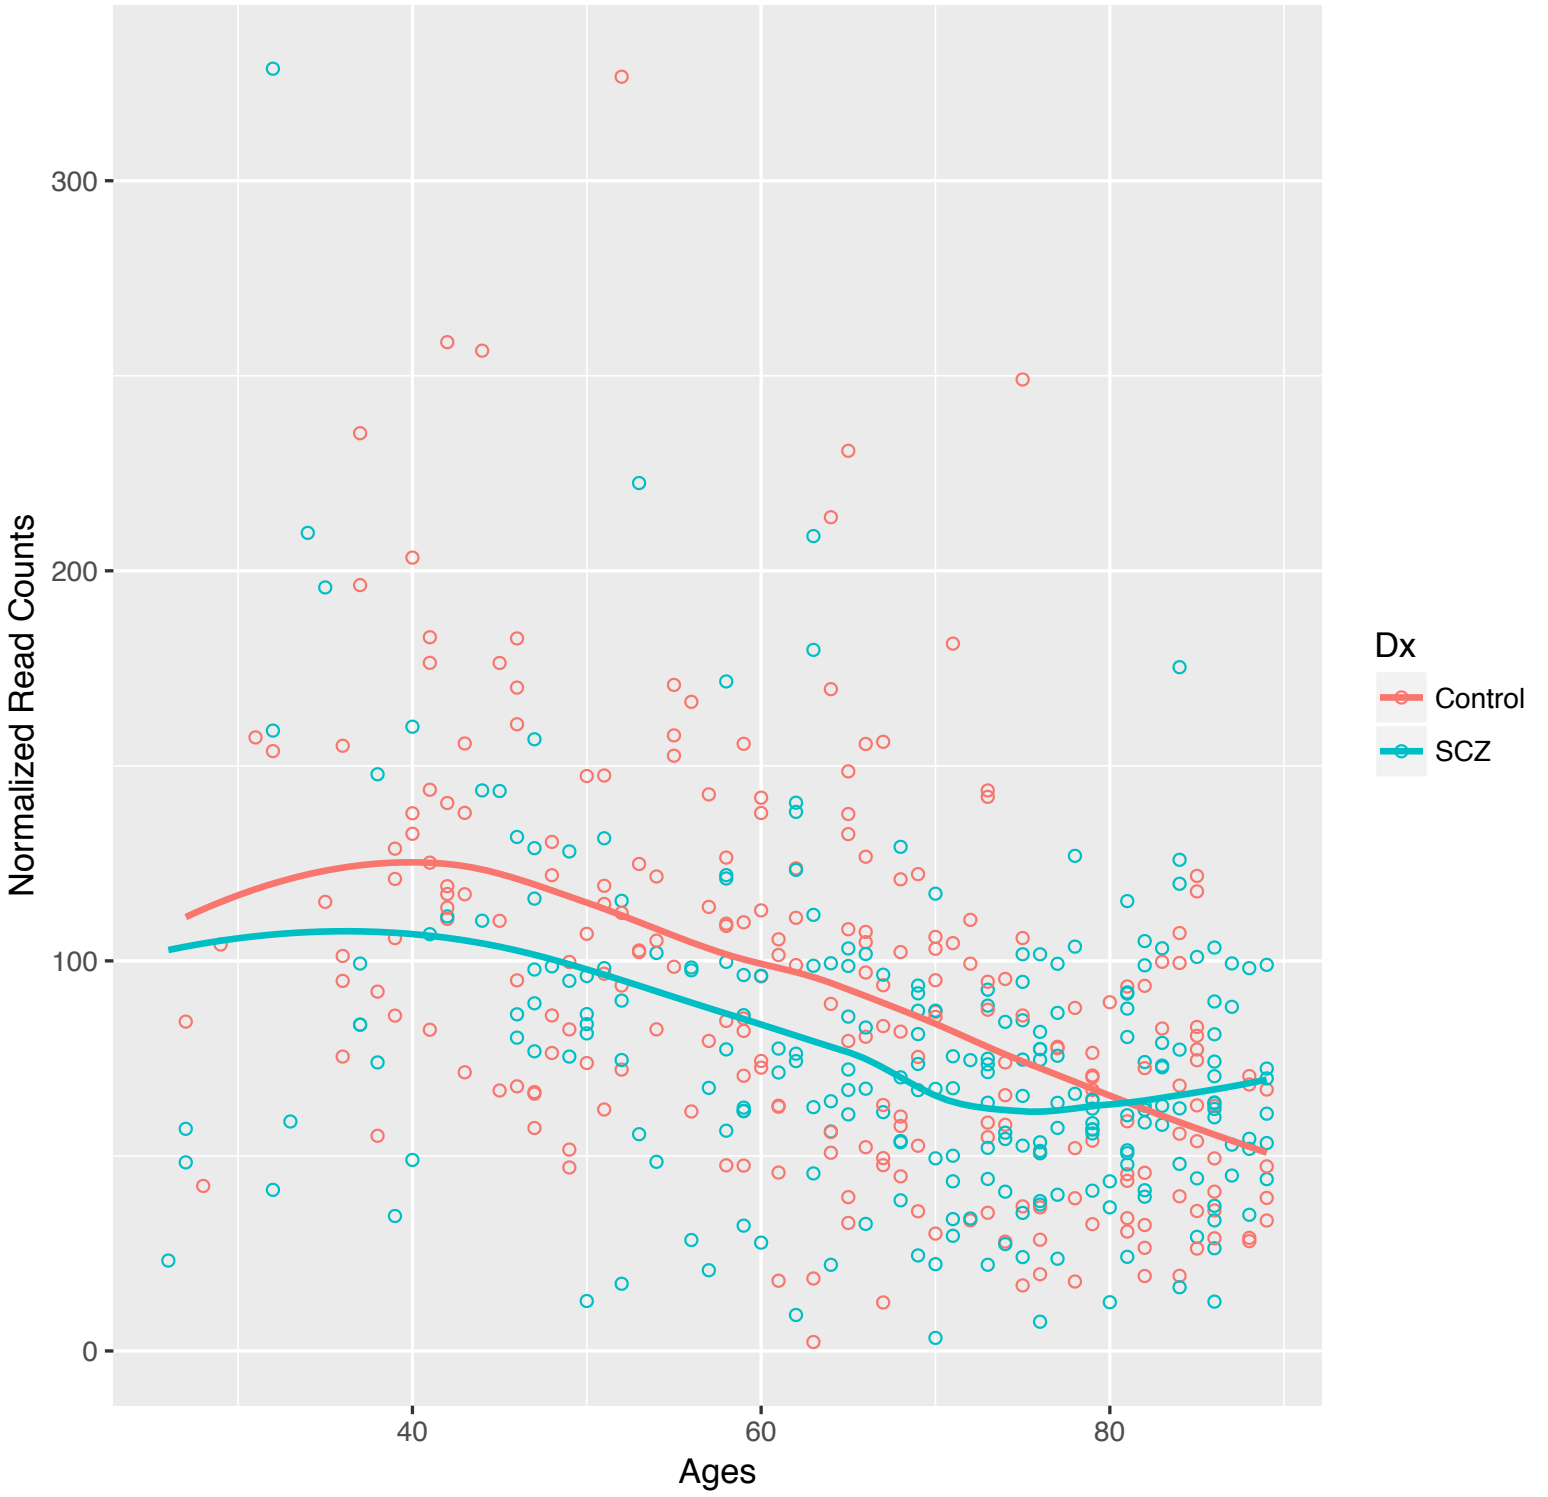

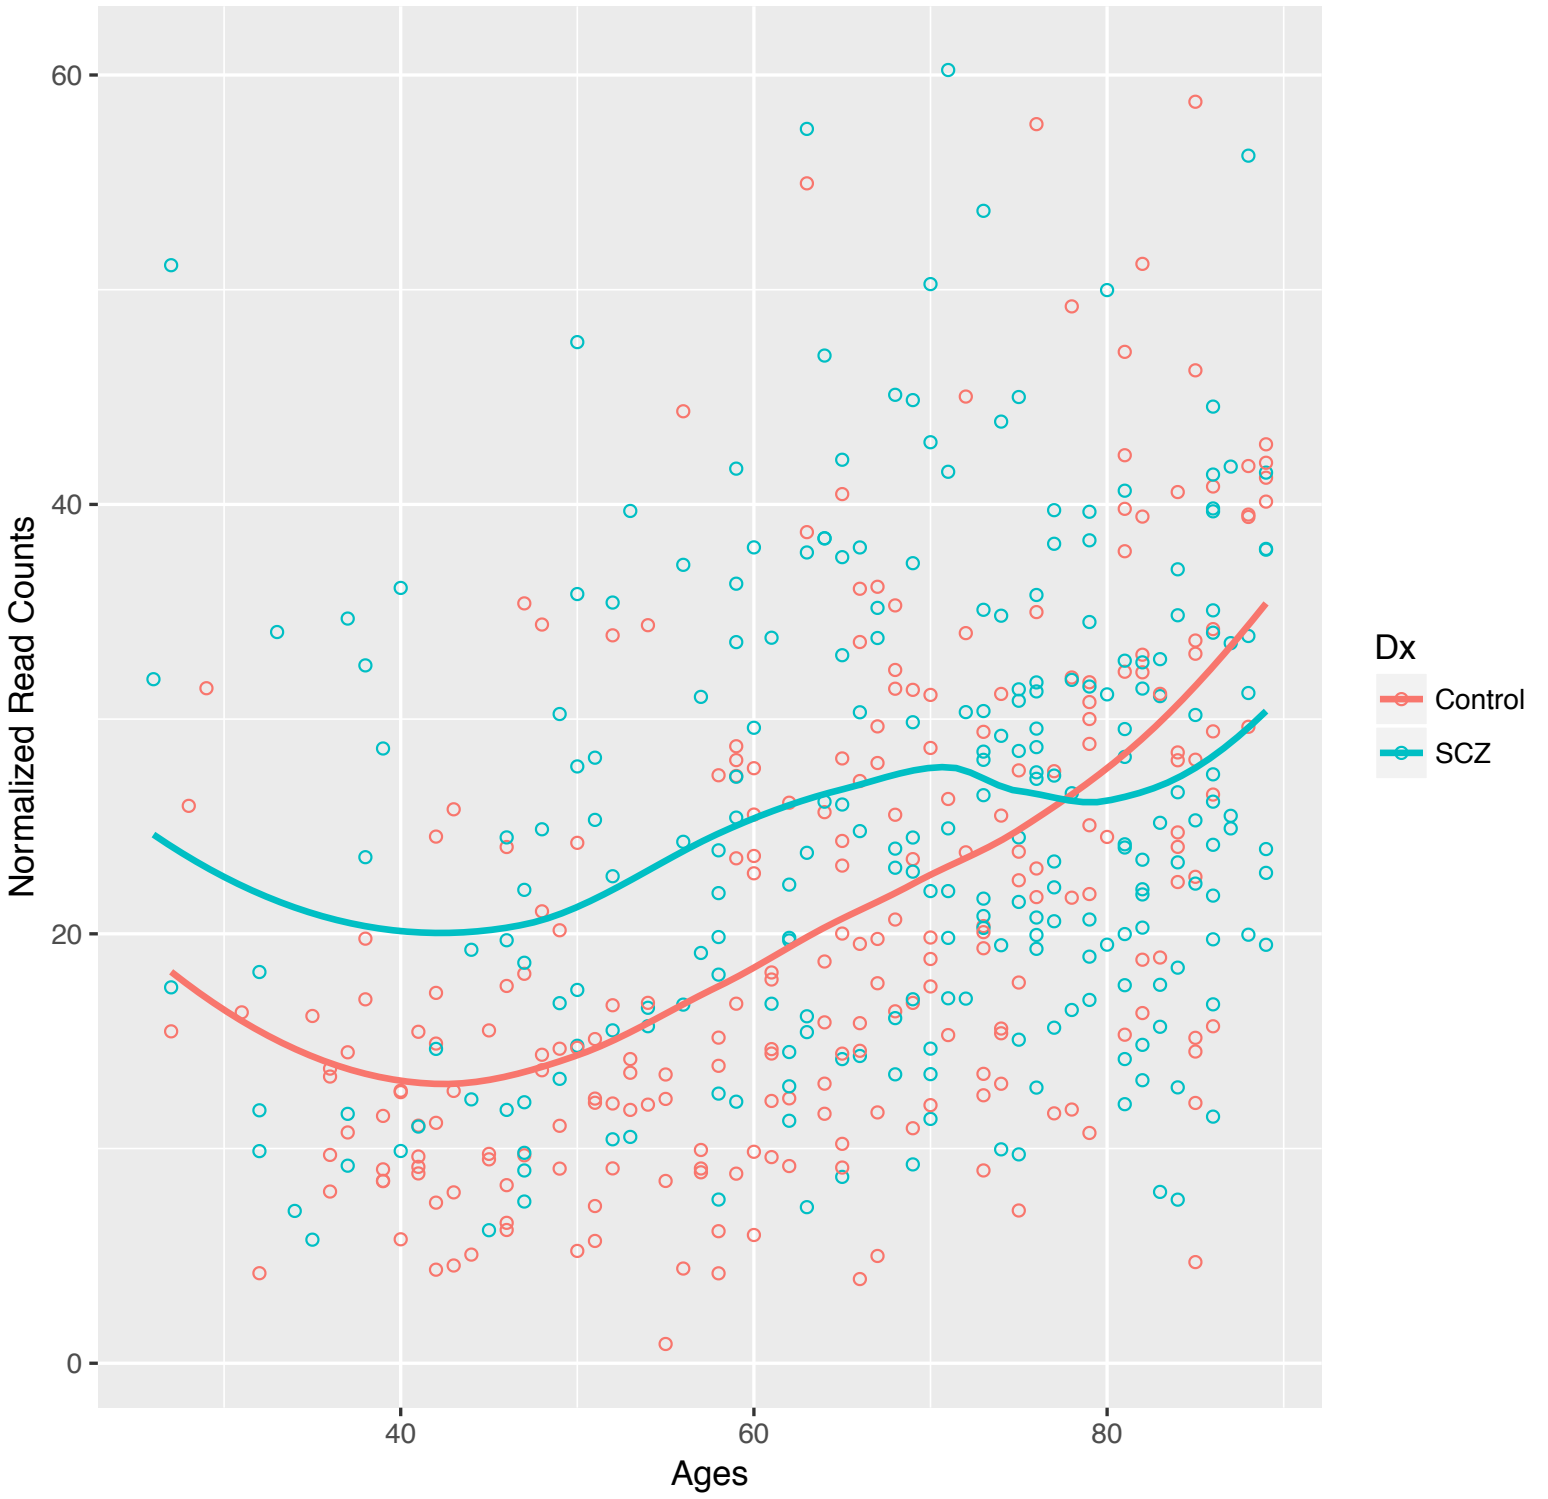



# ANKS6

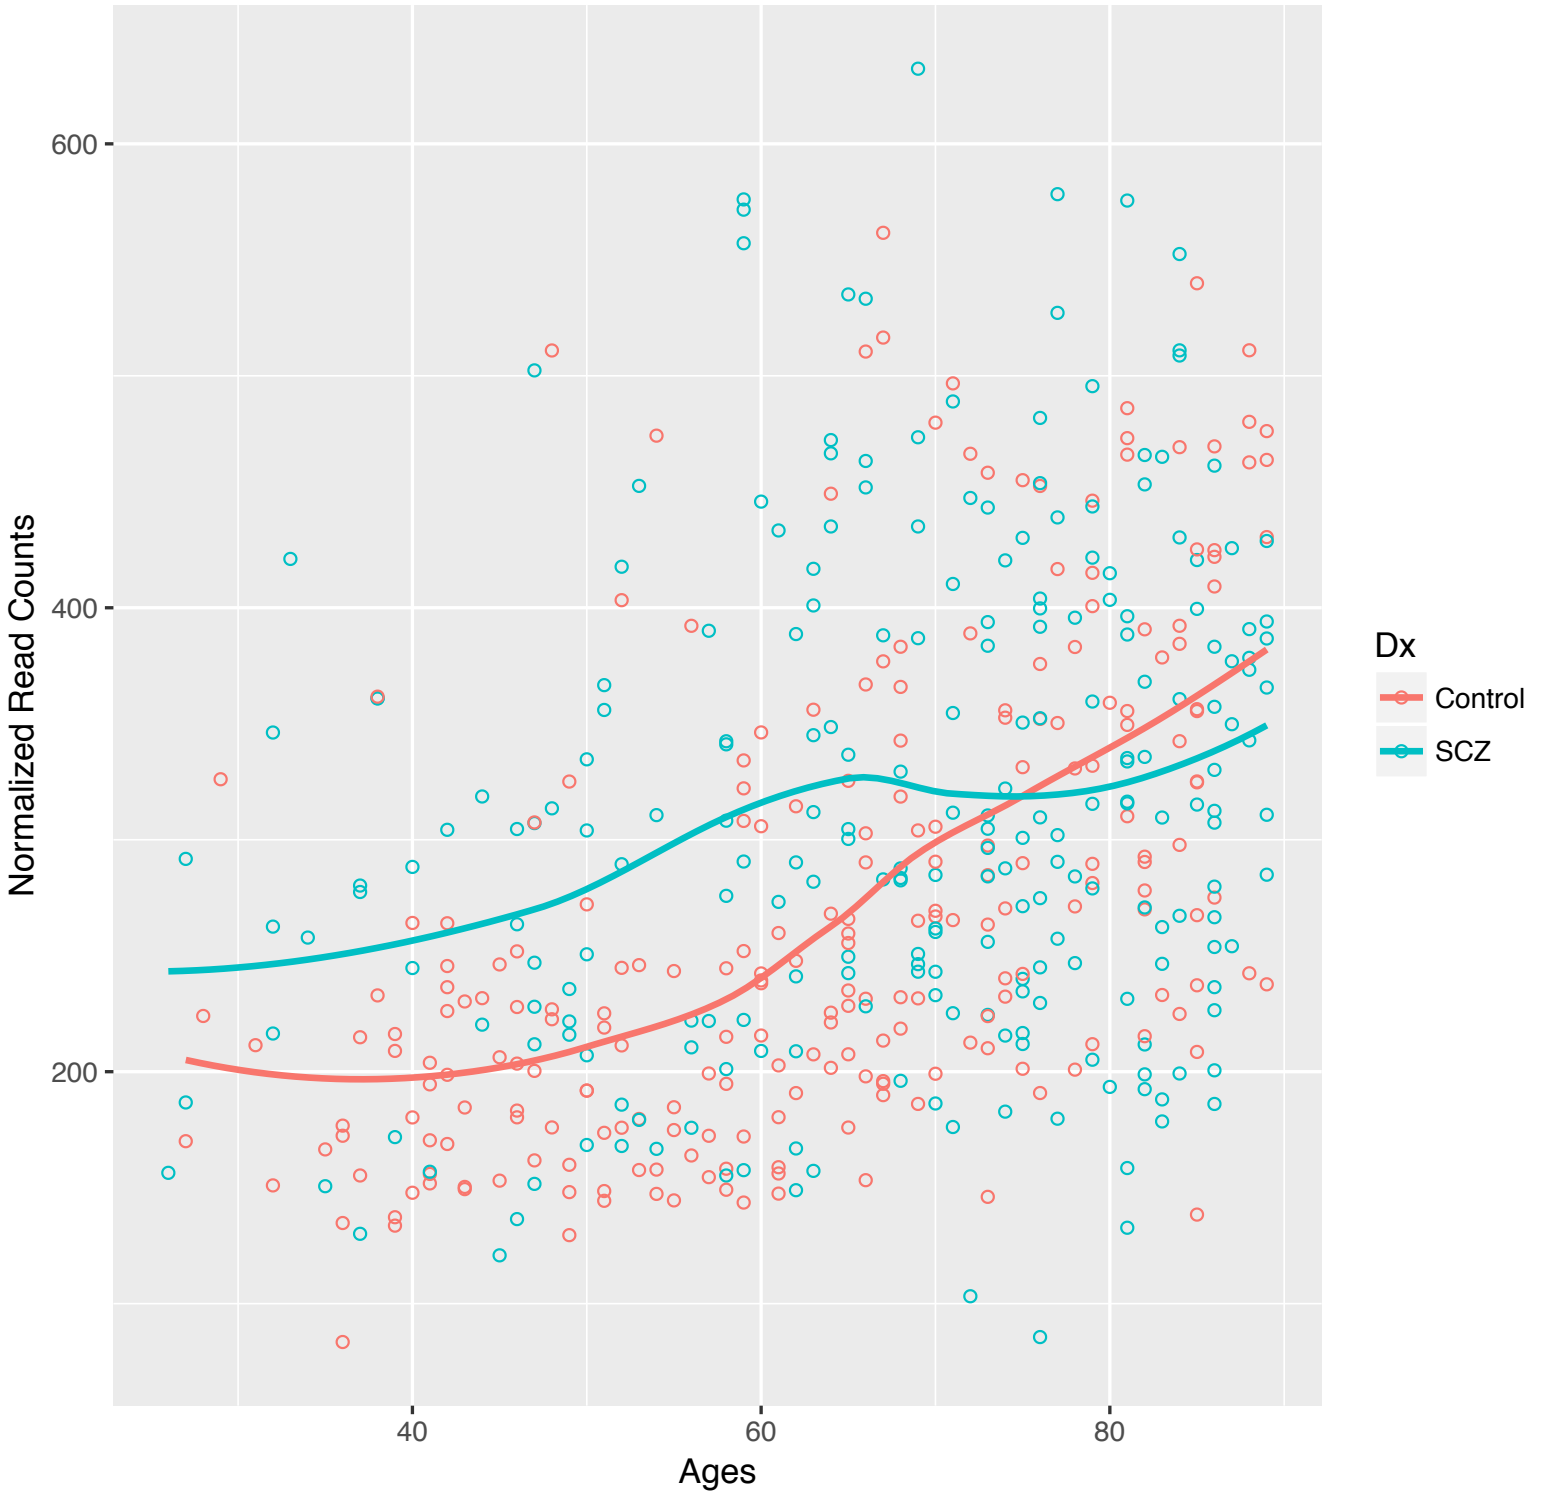

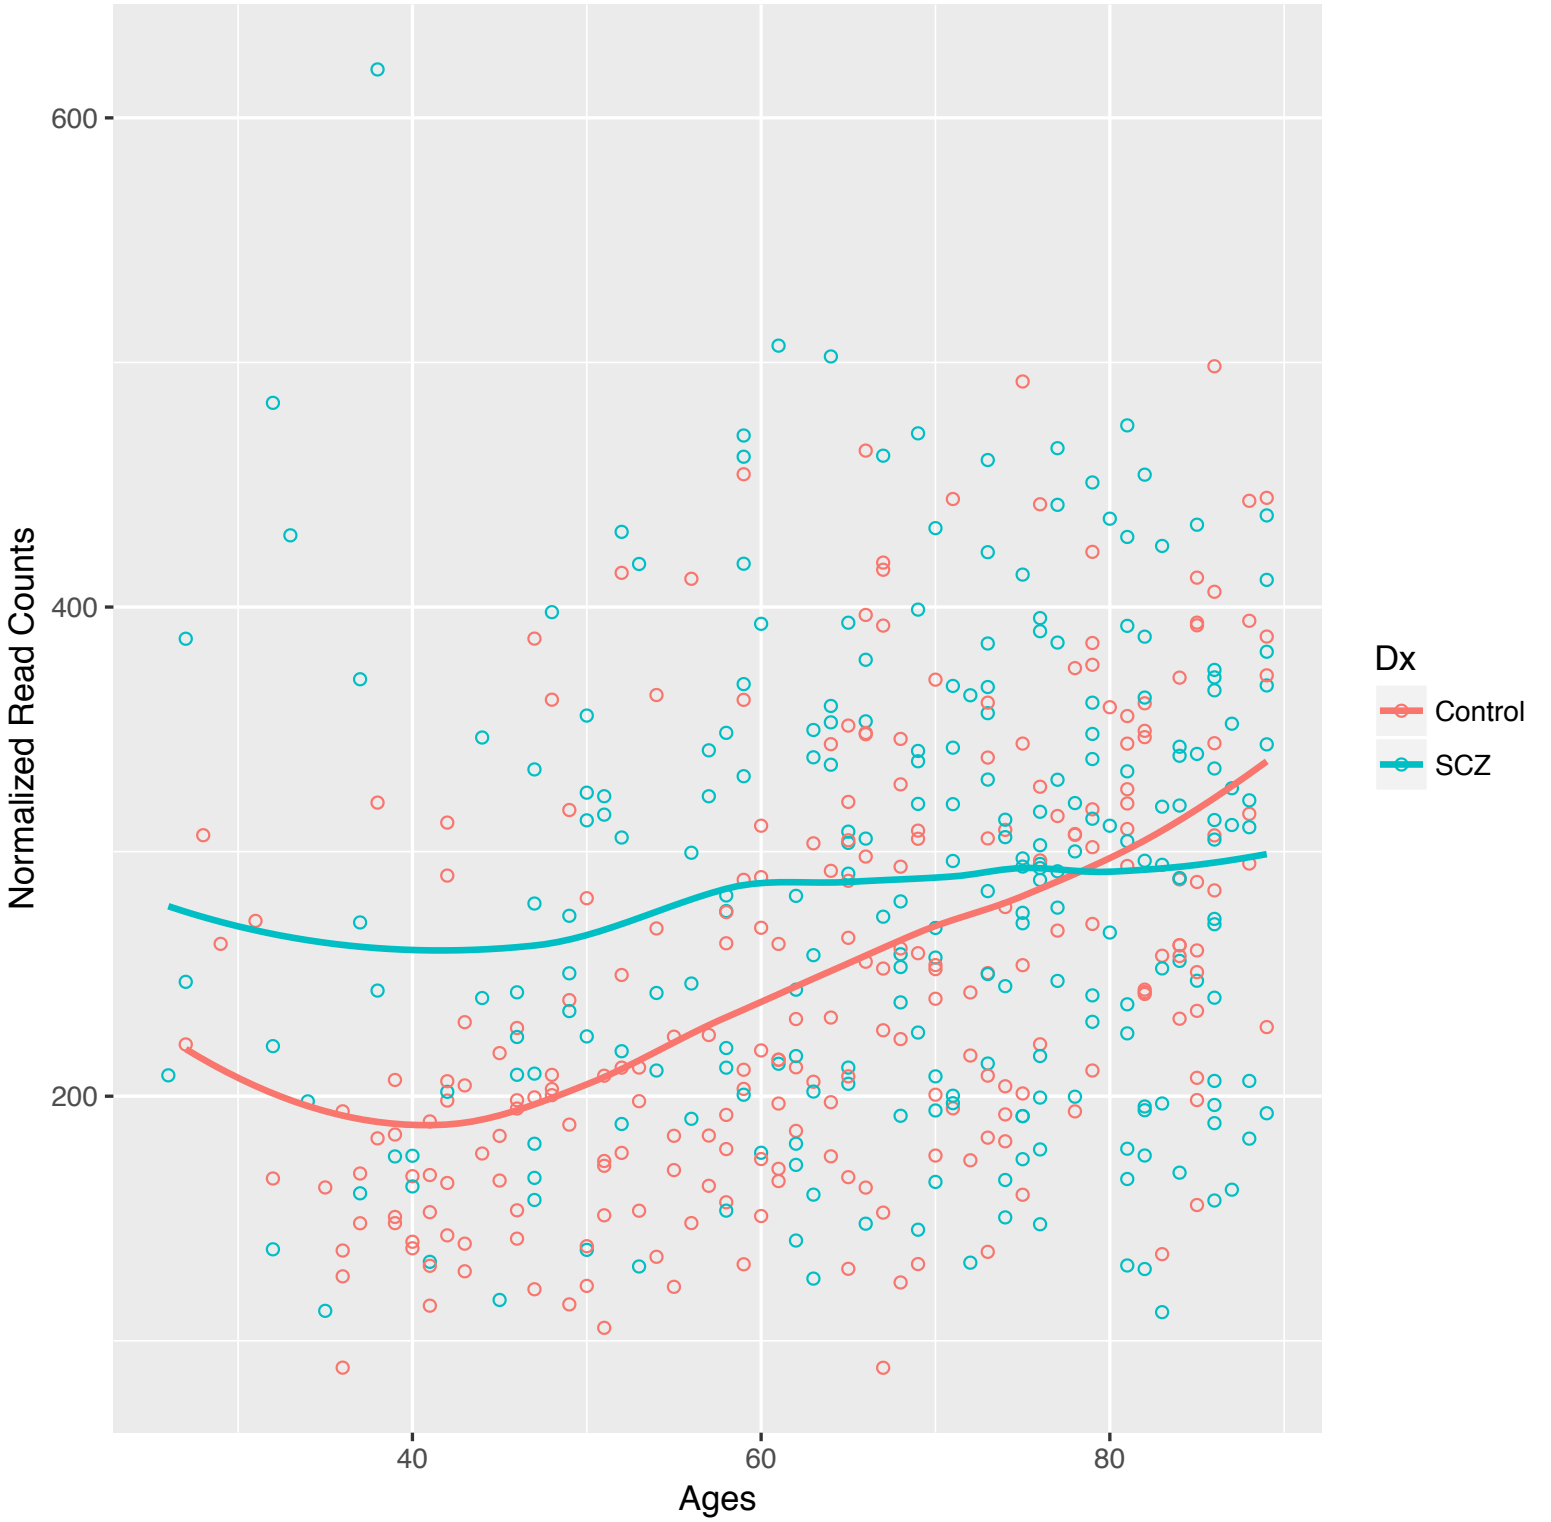

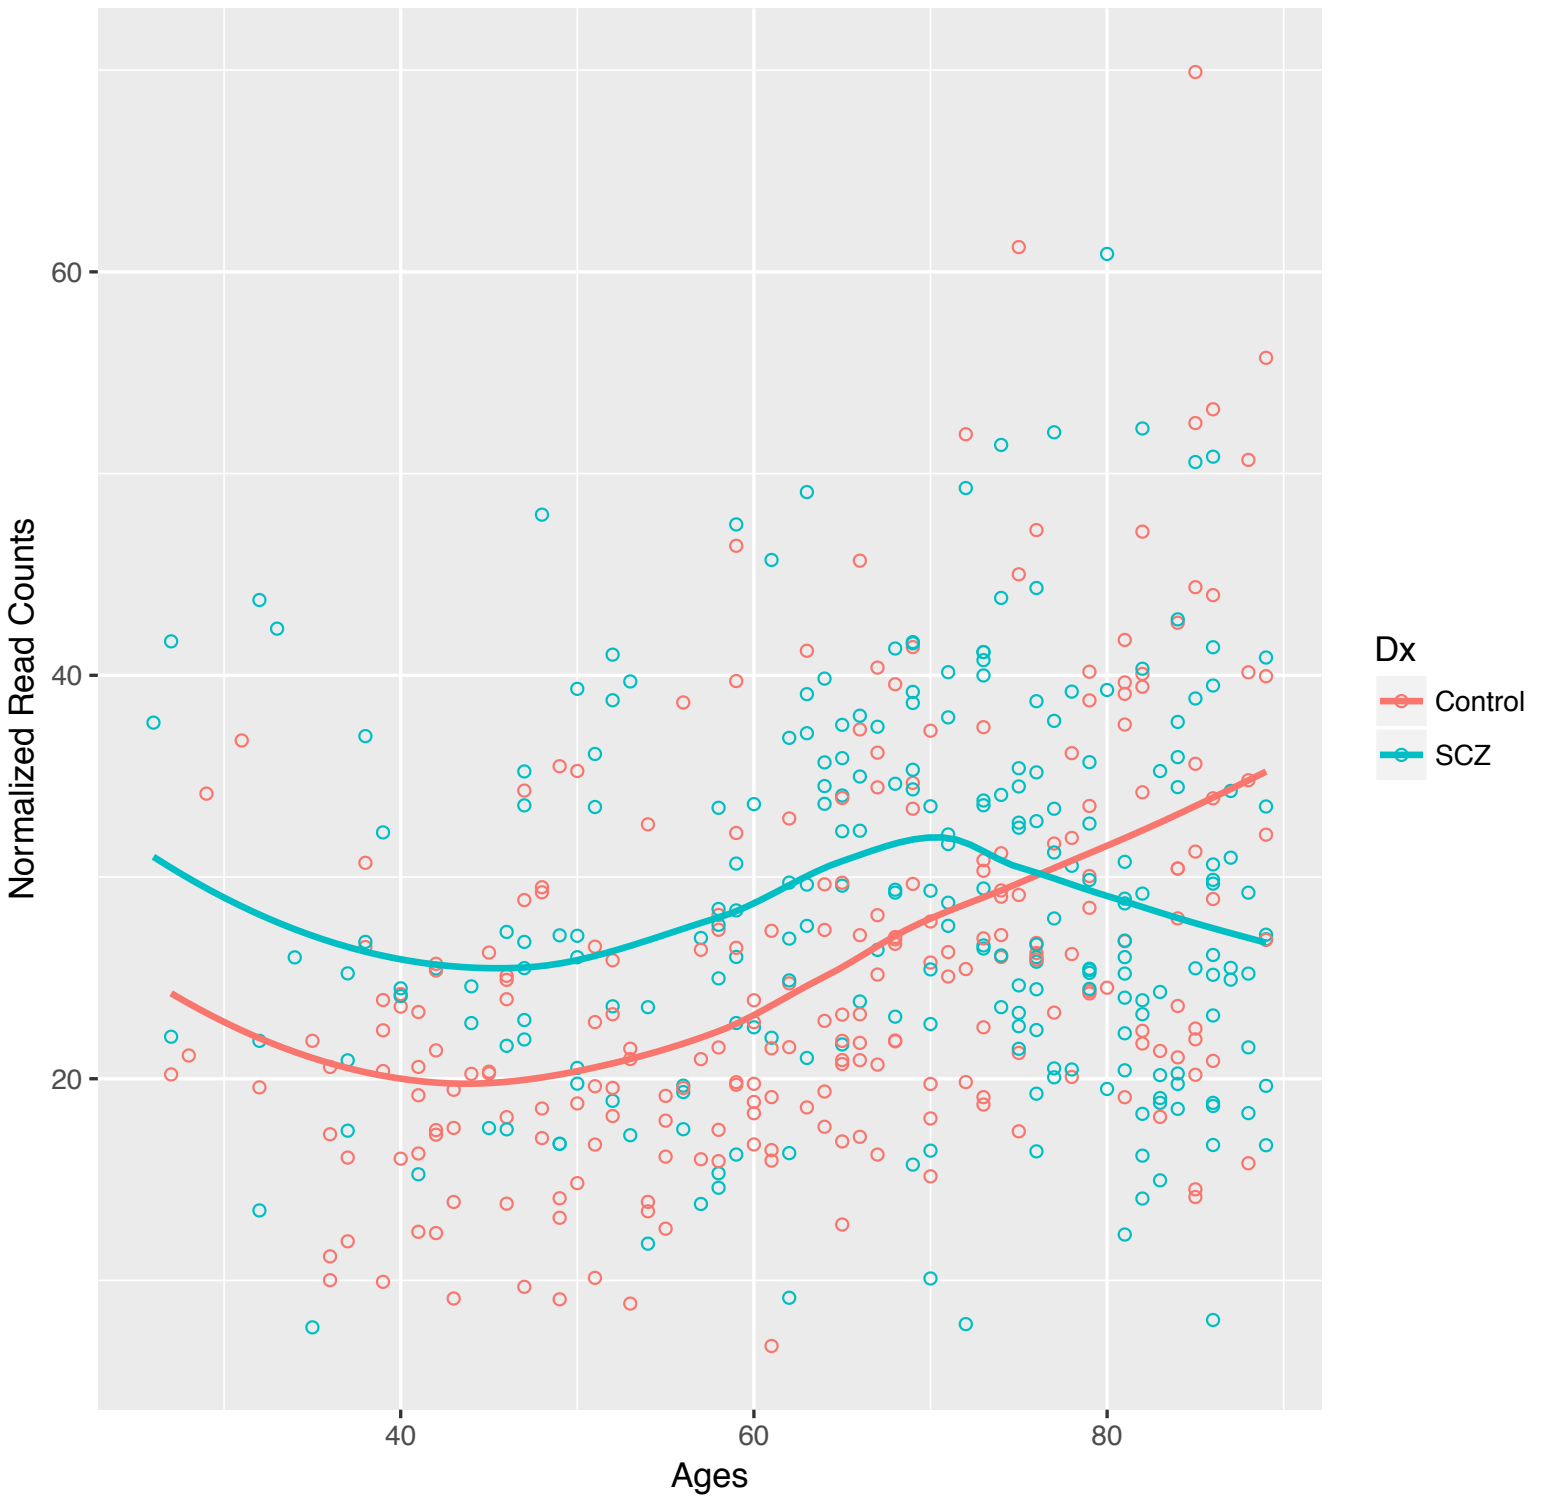

# COX7A1

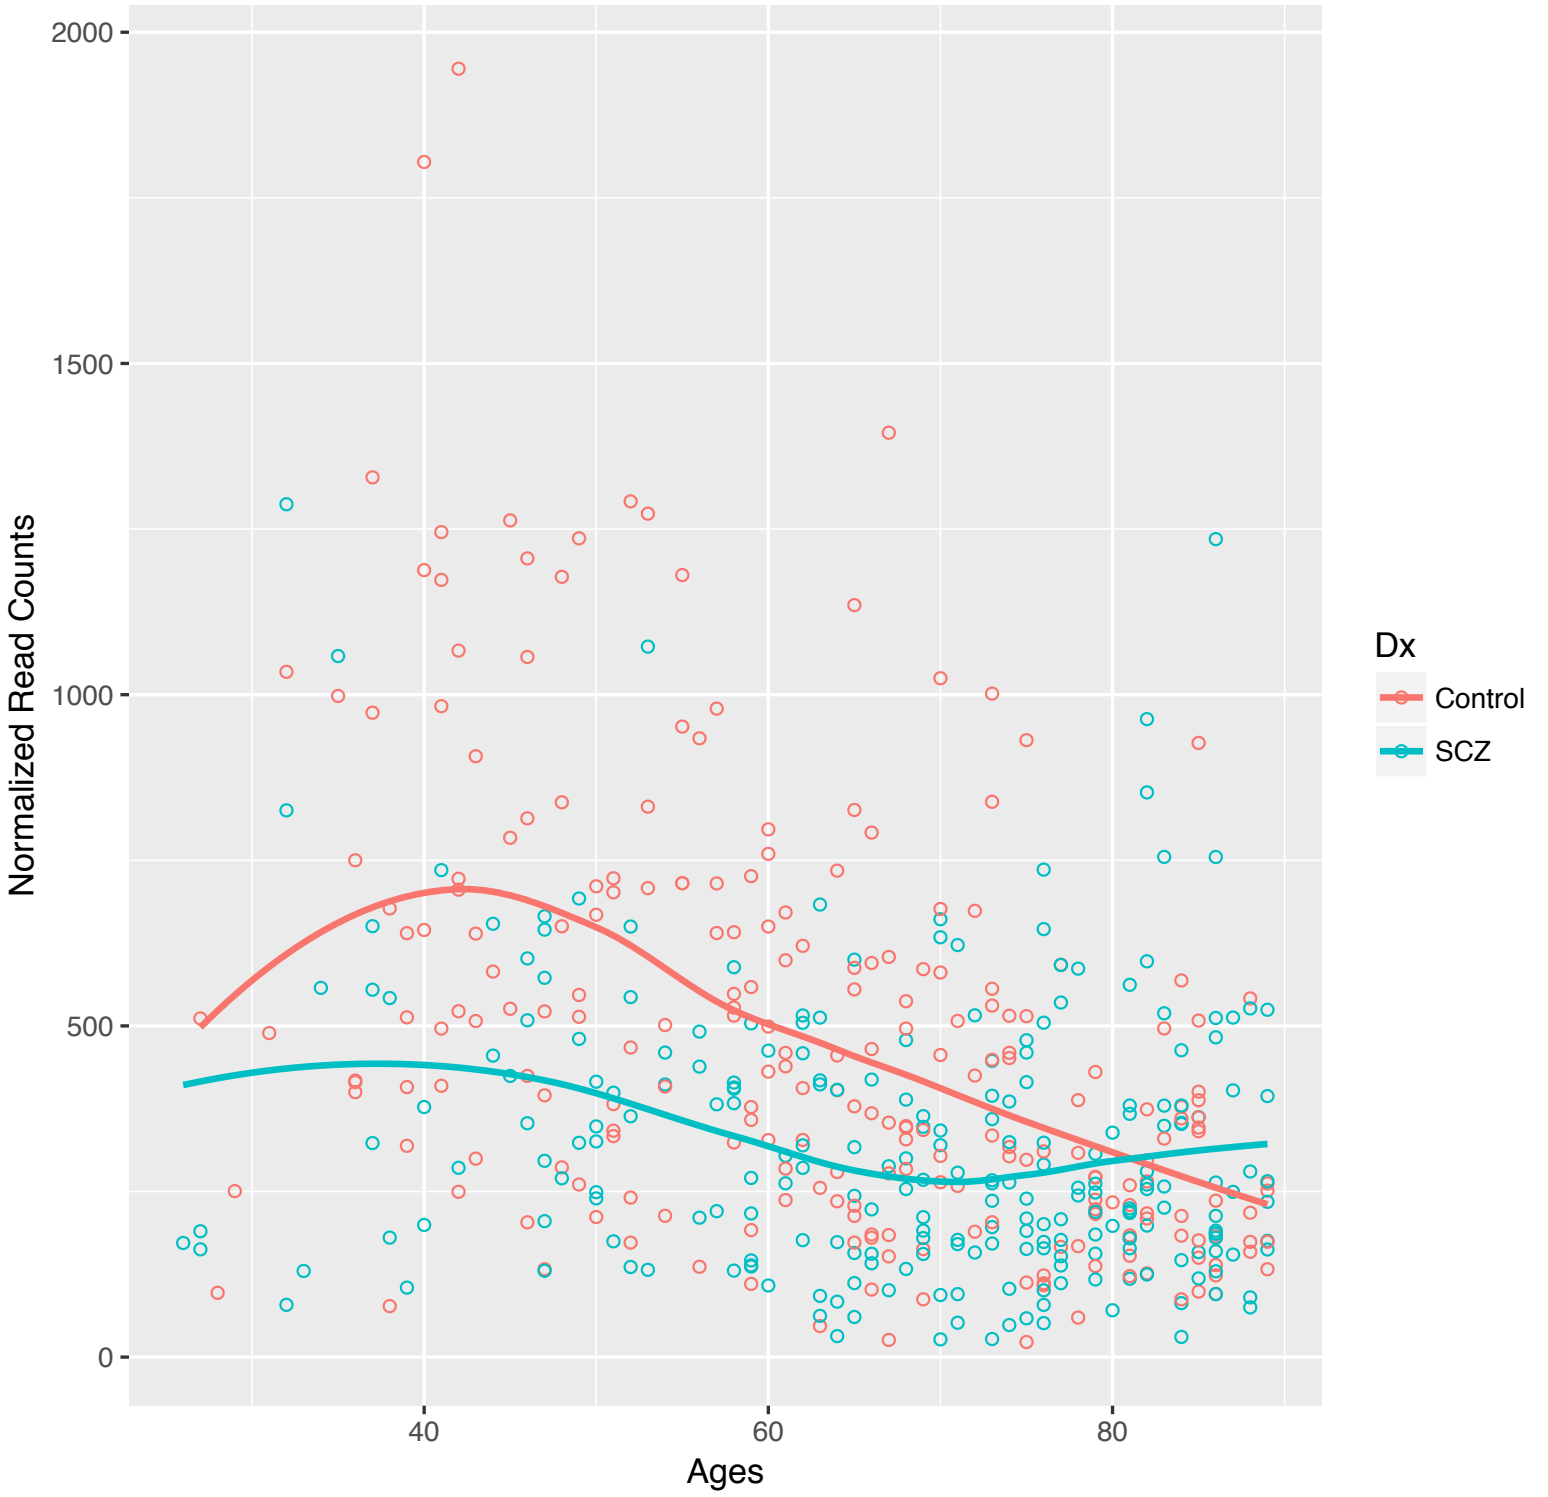

# STRC

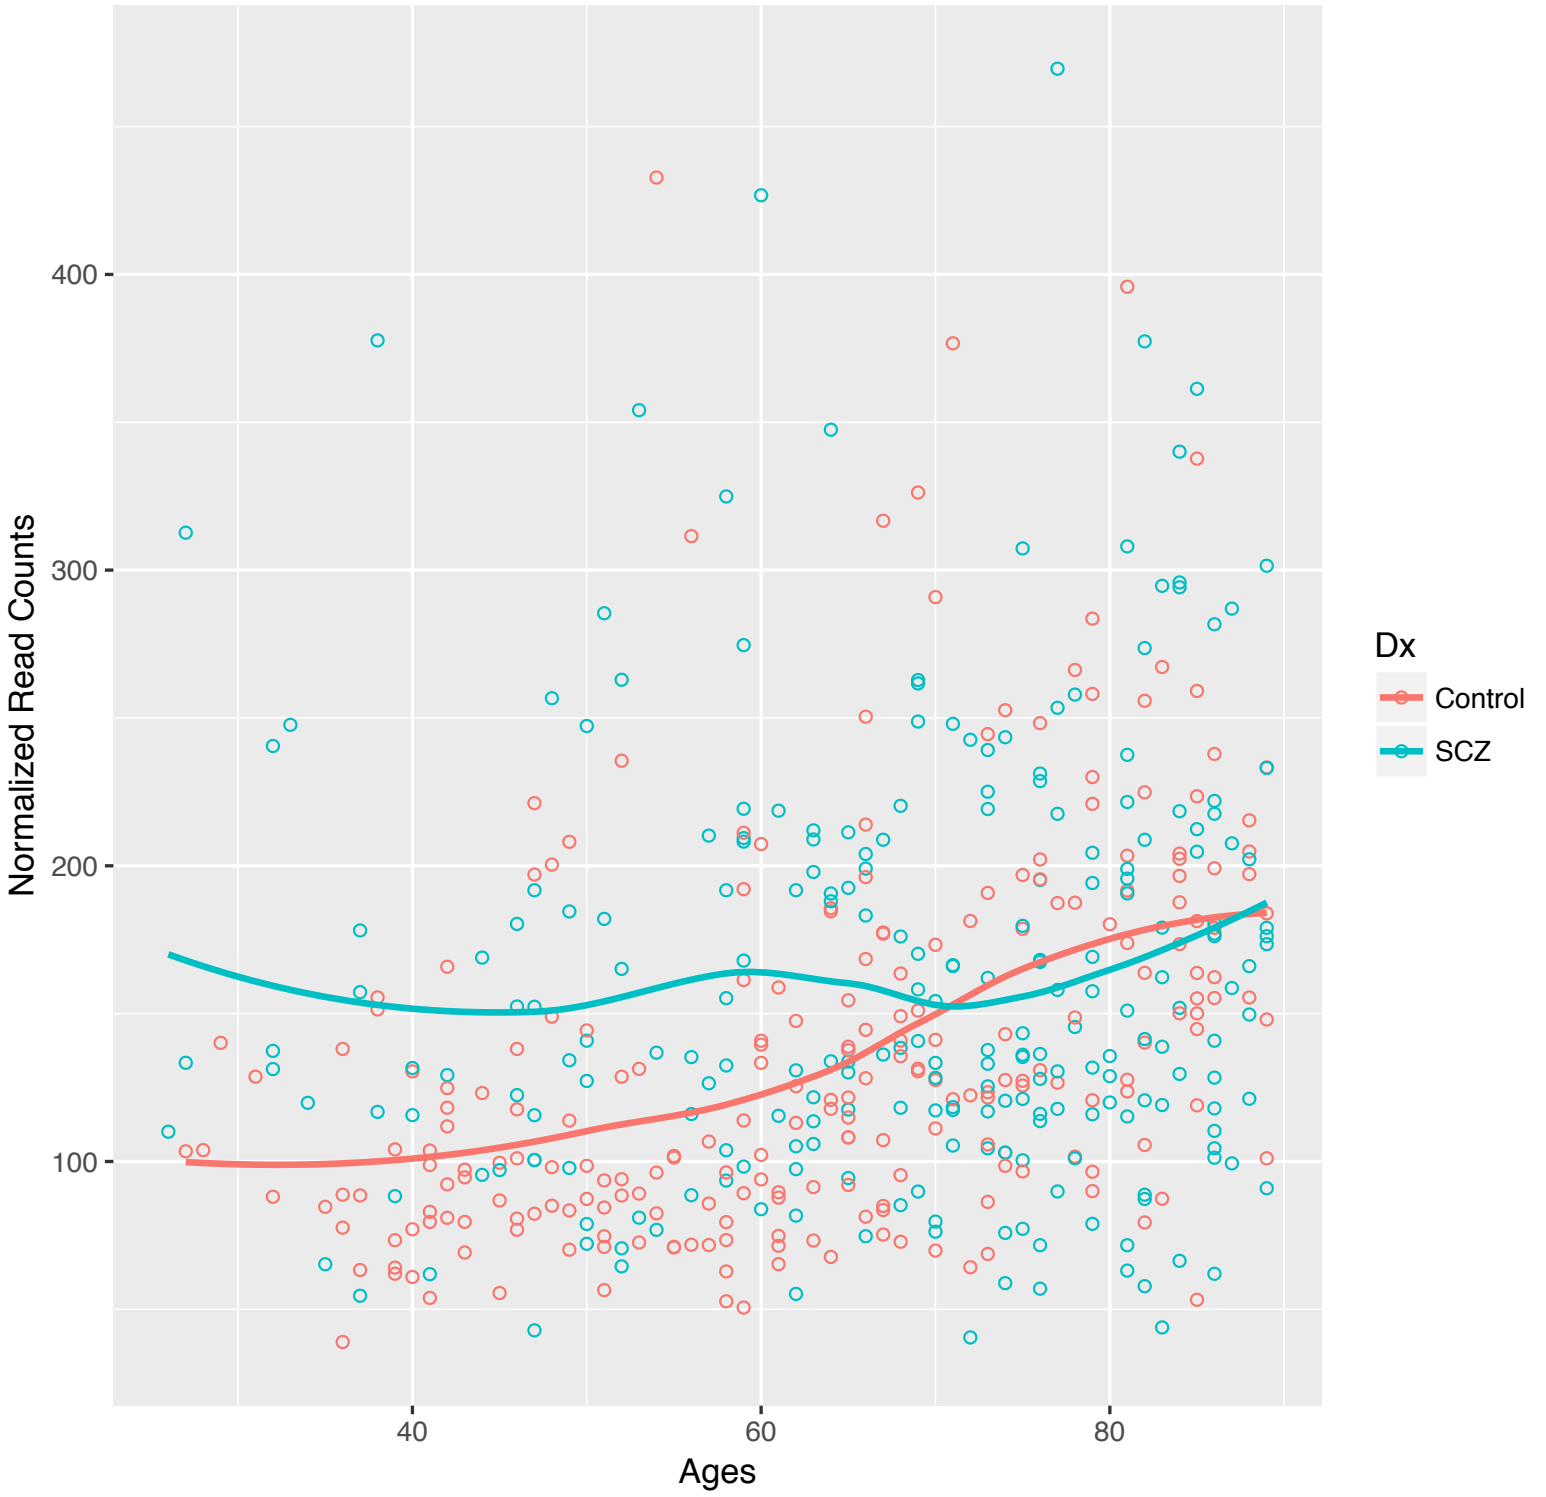

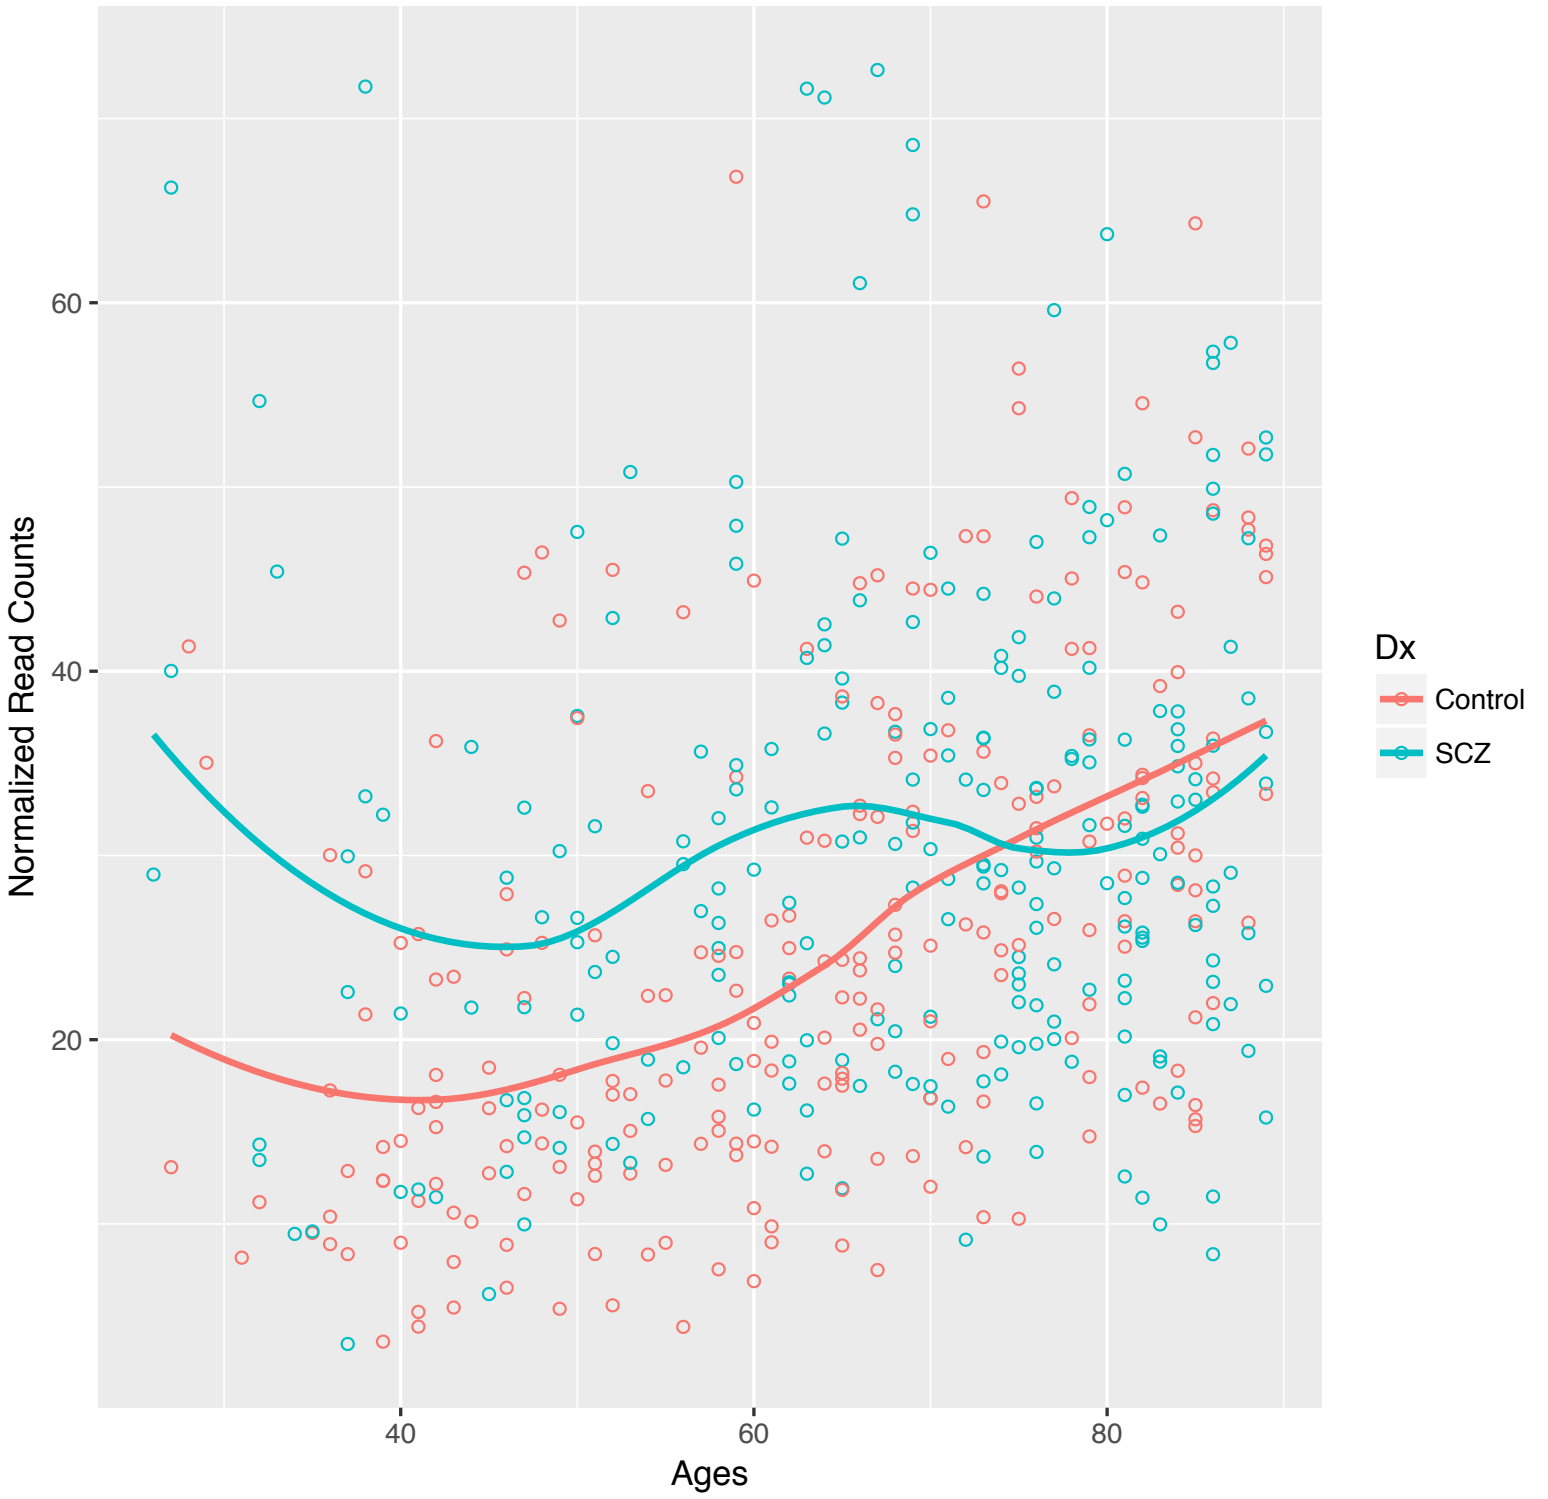

# NAA38

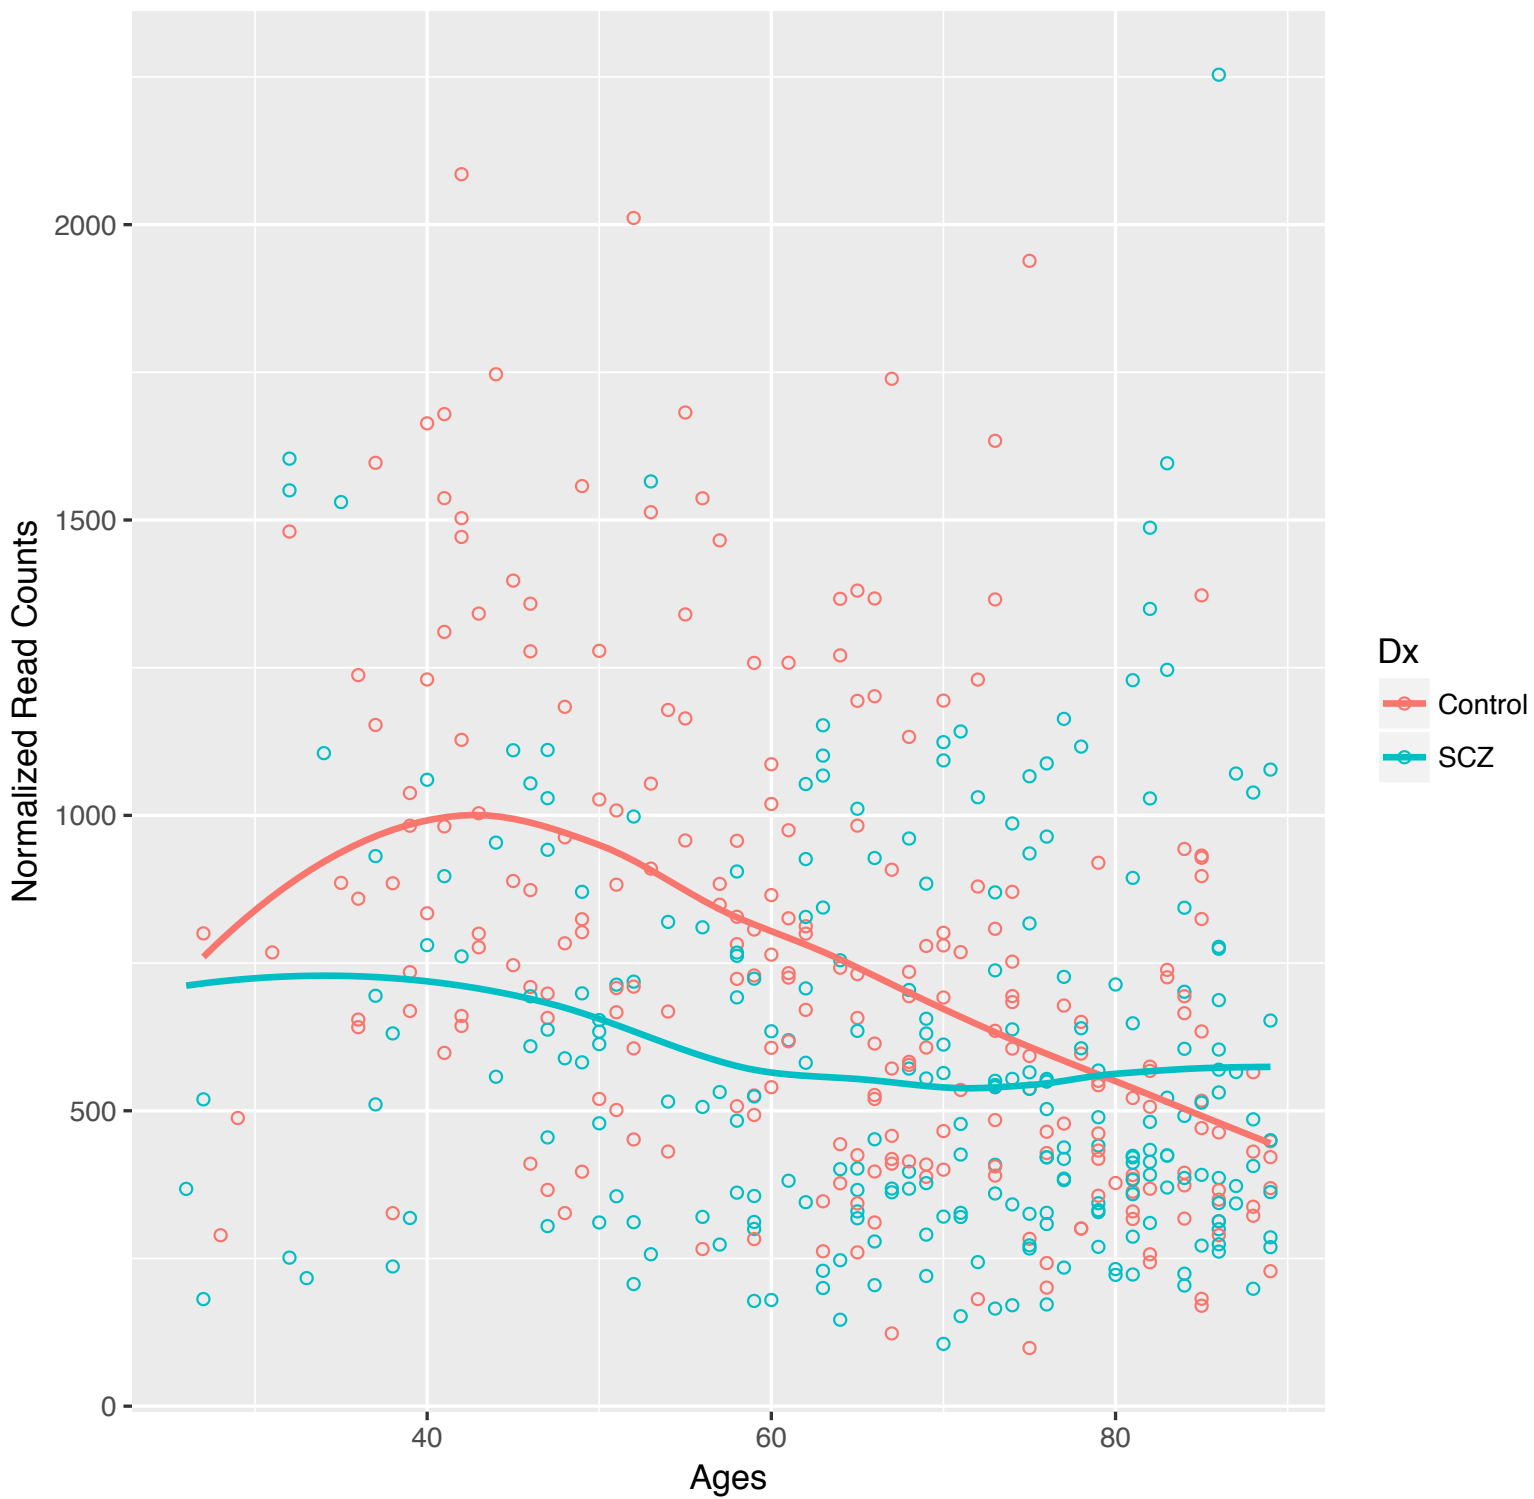

# LYRM4

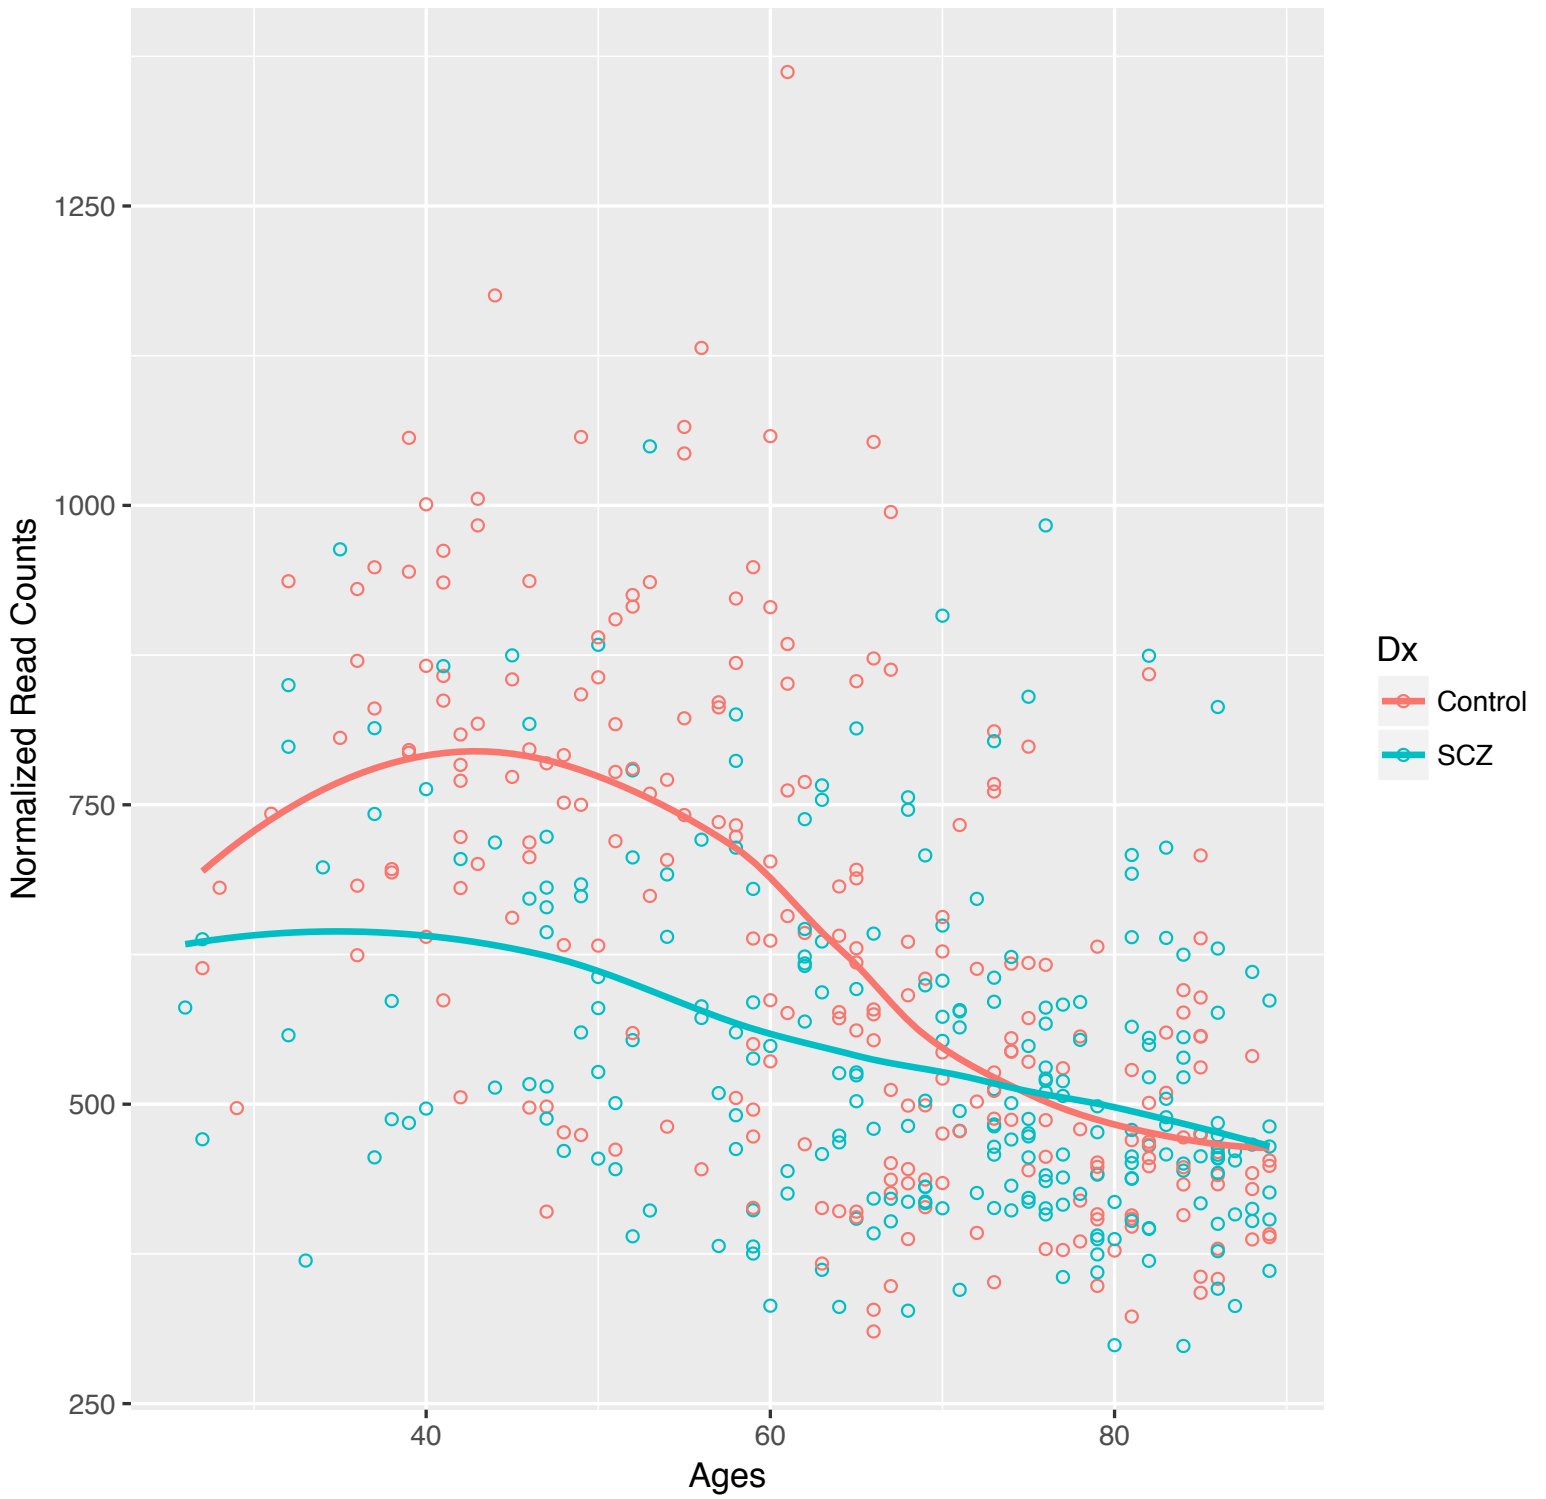



# NUP133

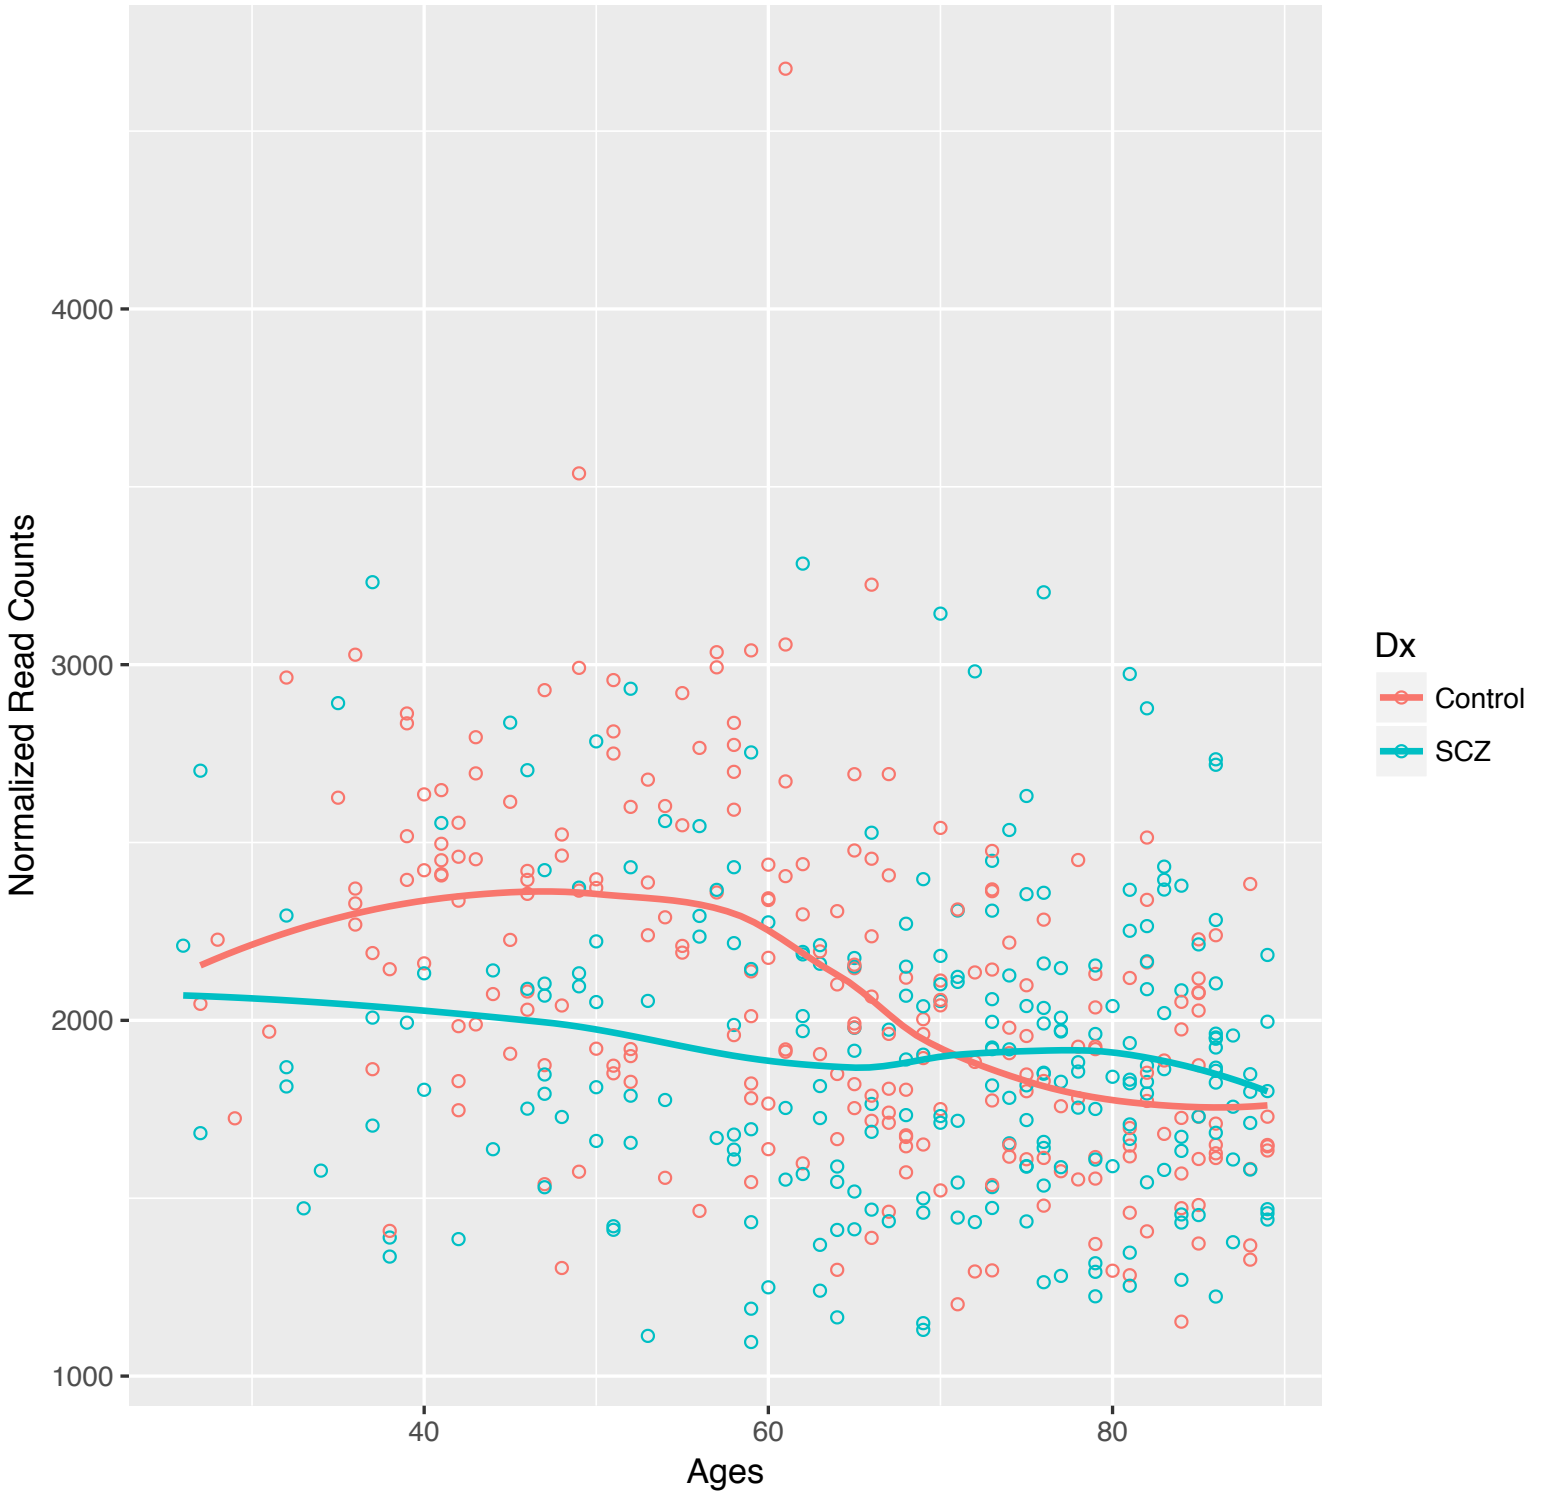

# SMAD1

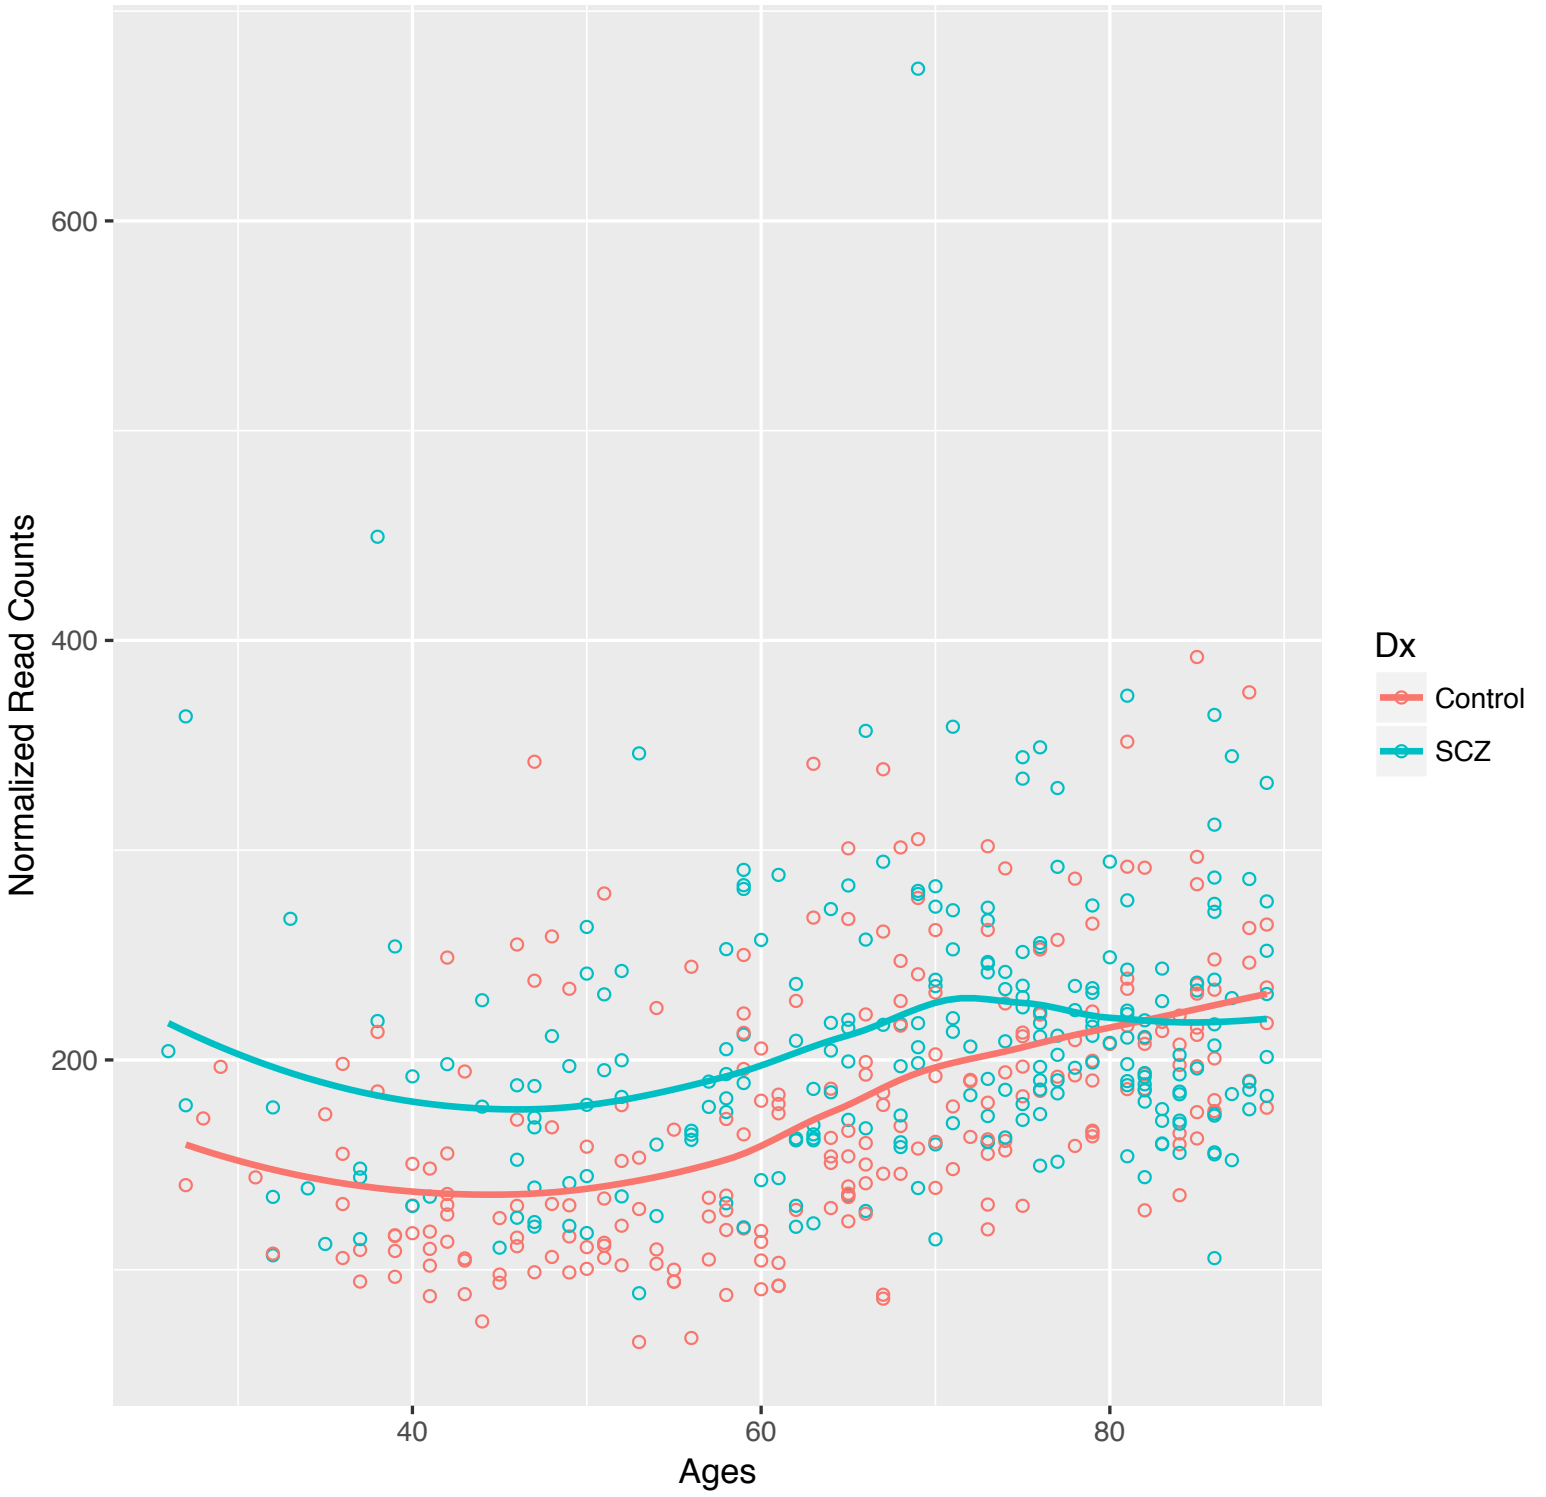

# ATP5F1C

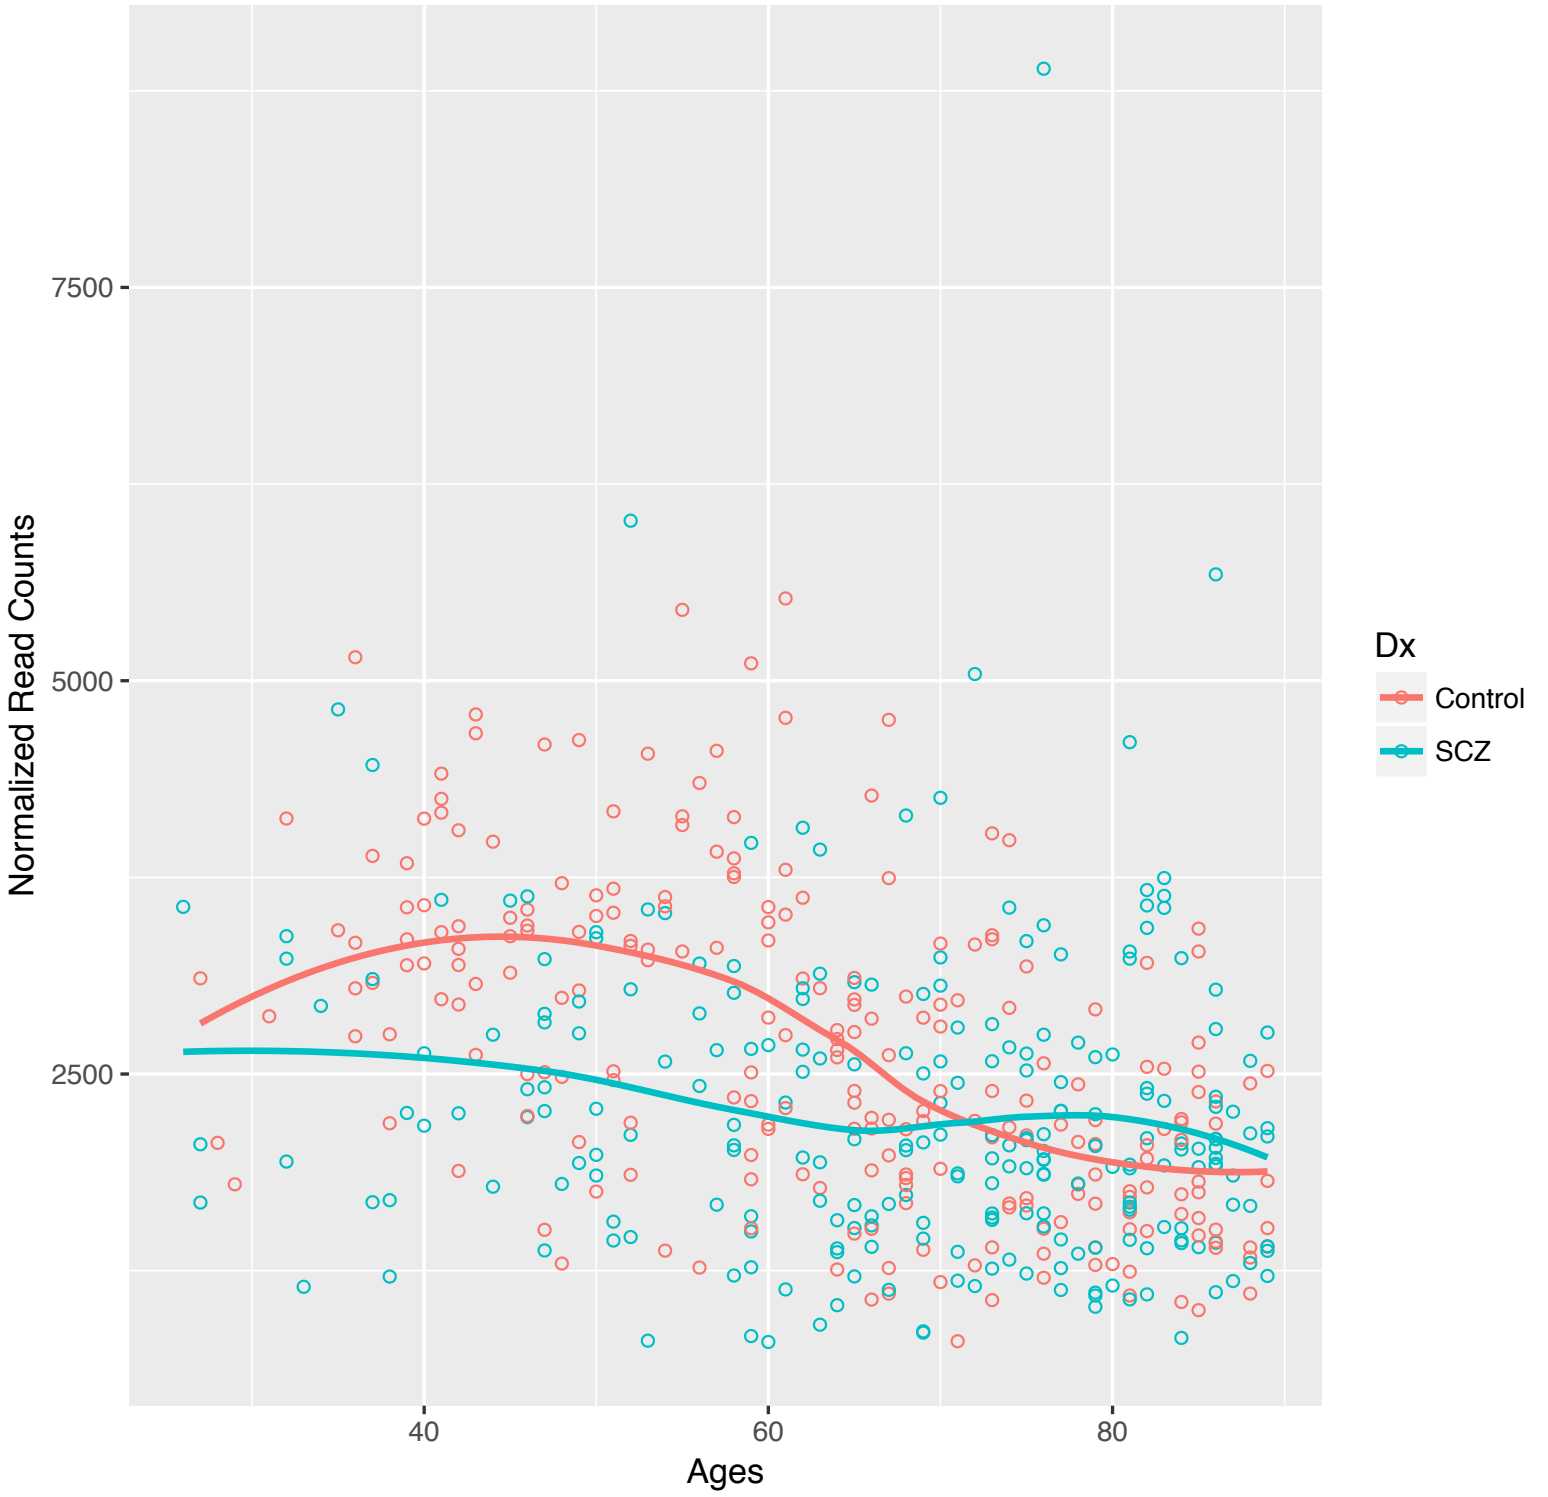

# KAZALD1

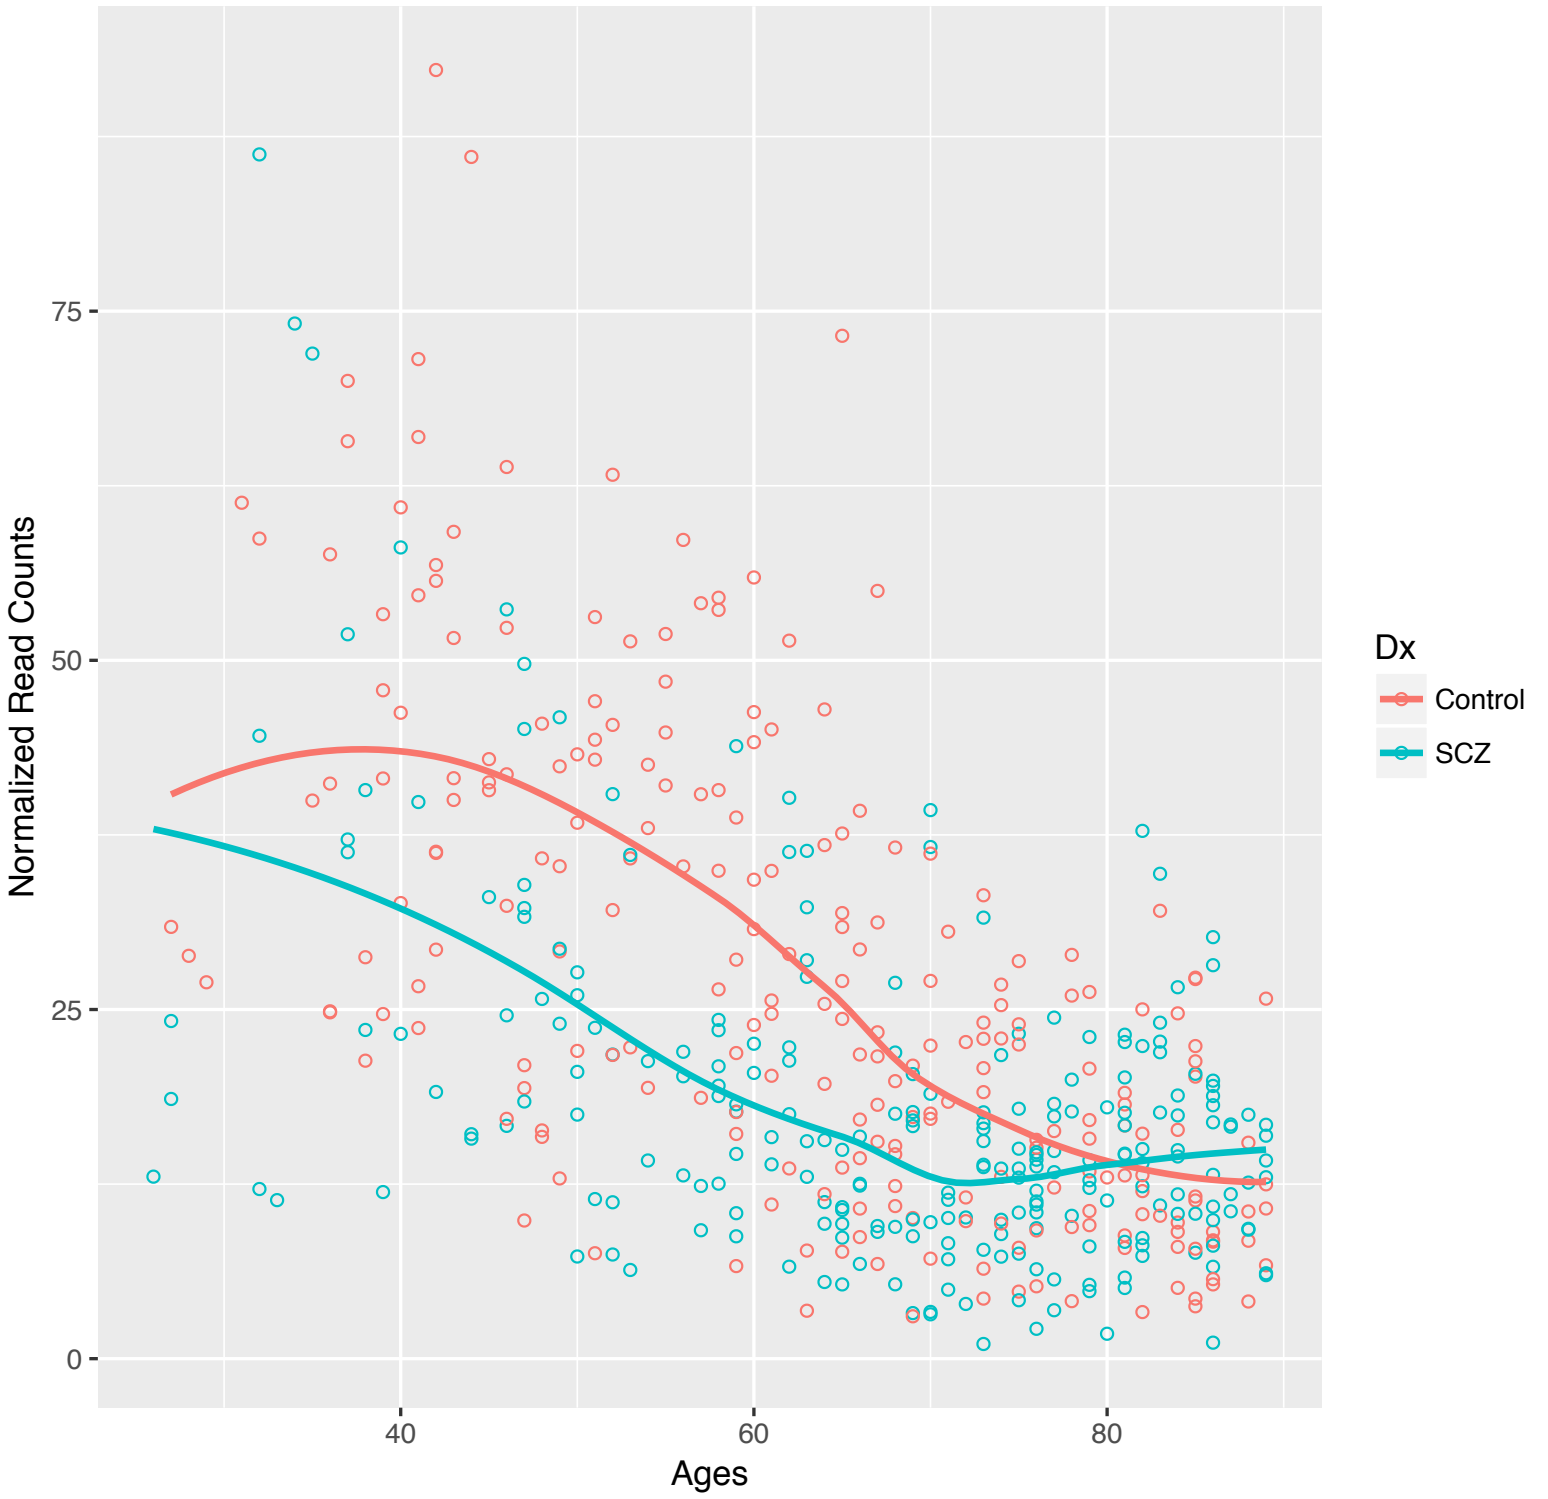

# ESYT3

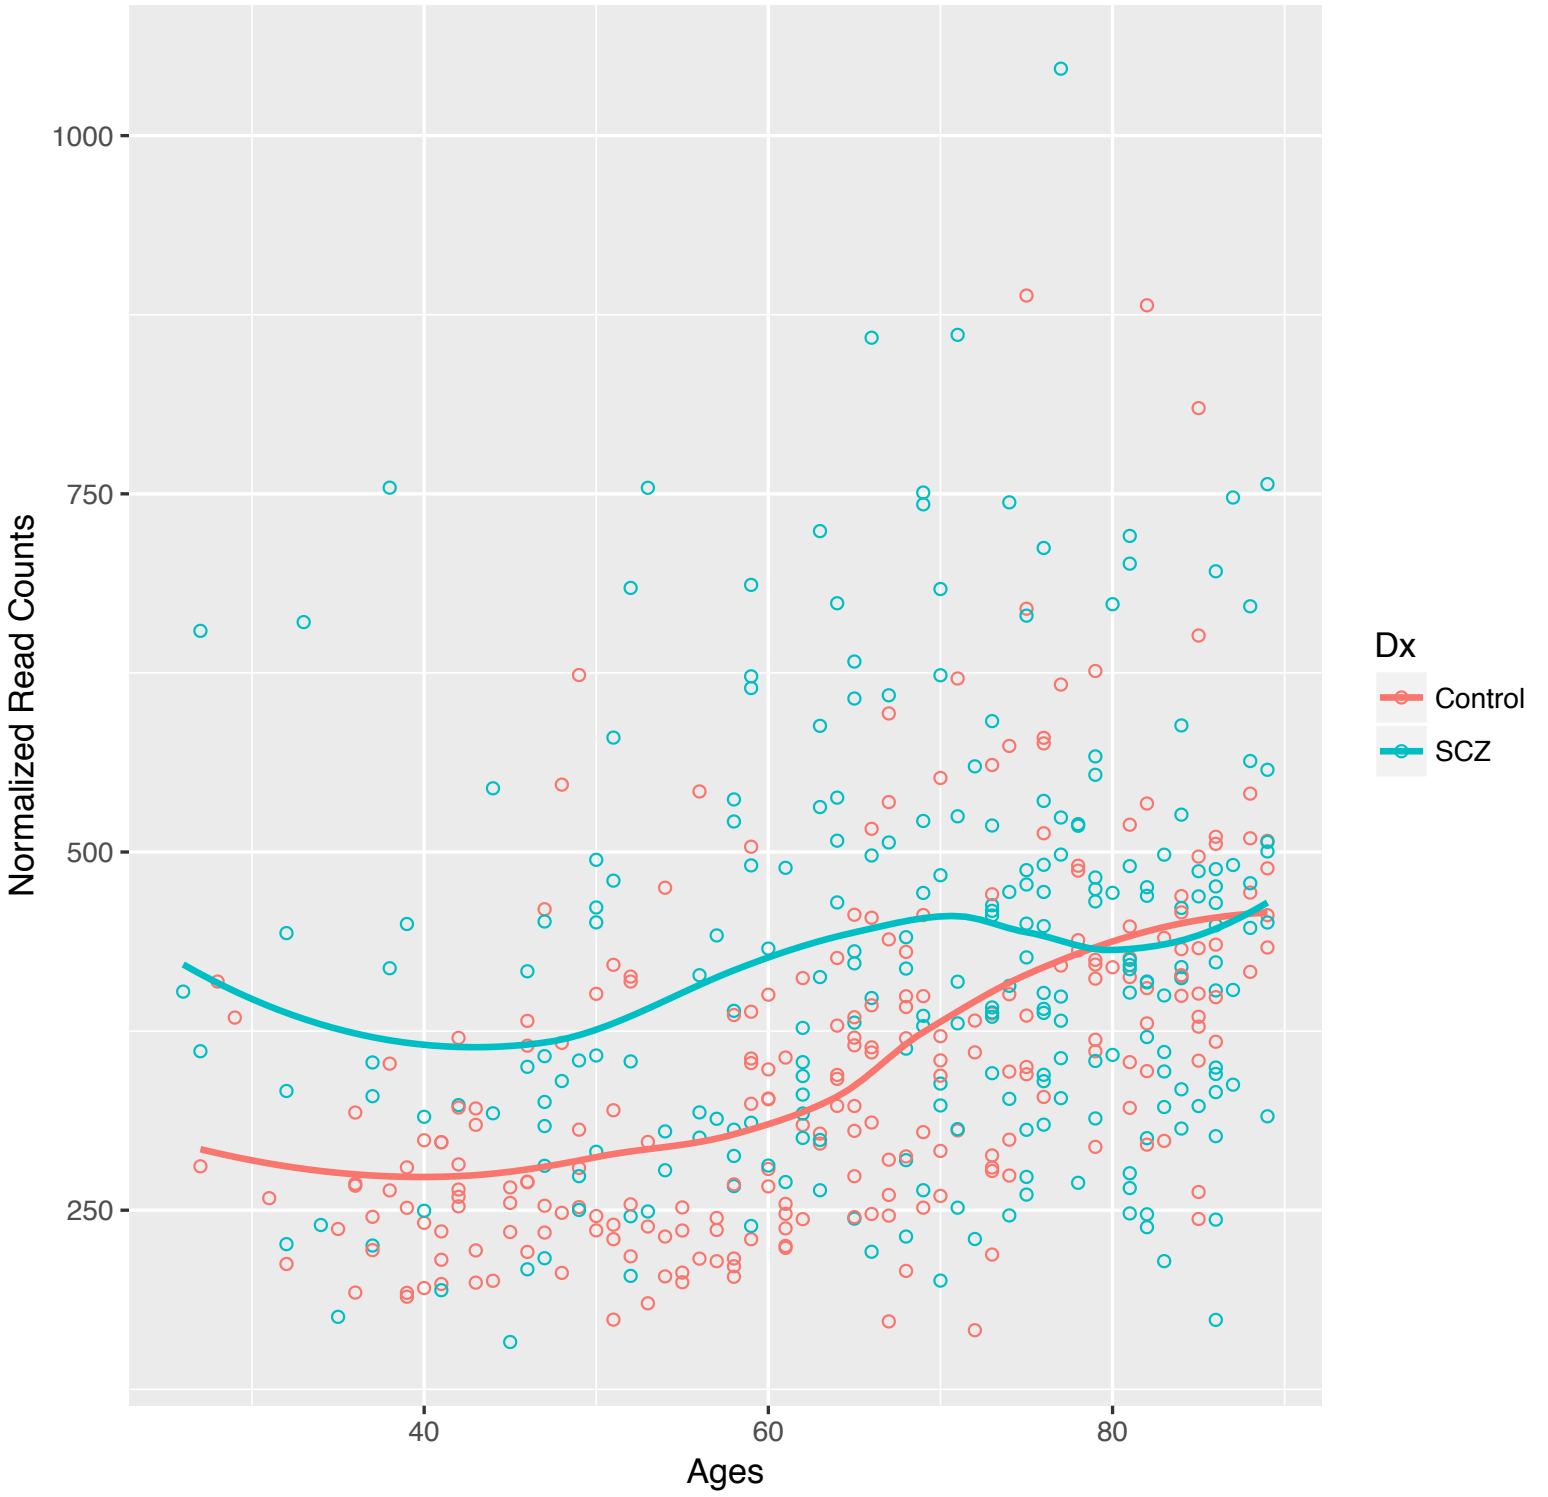

# HELQ

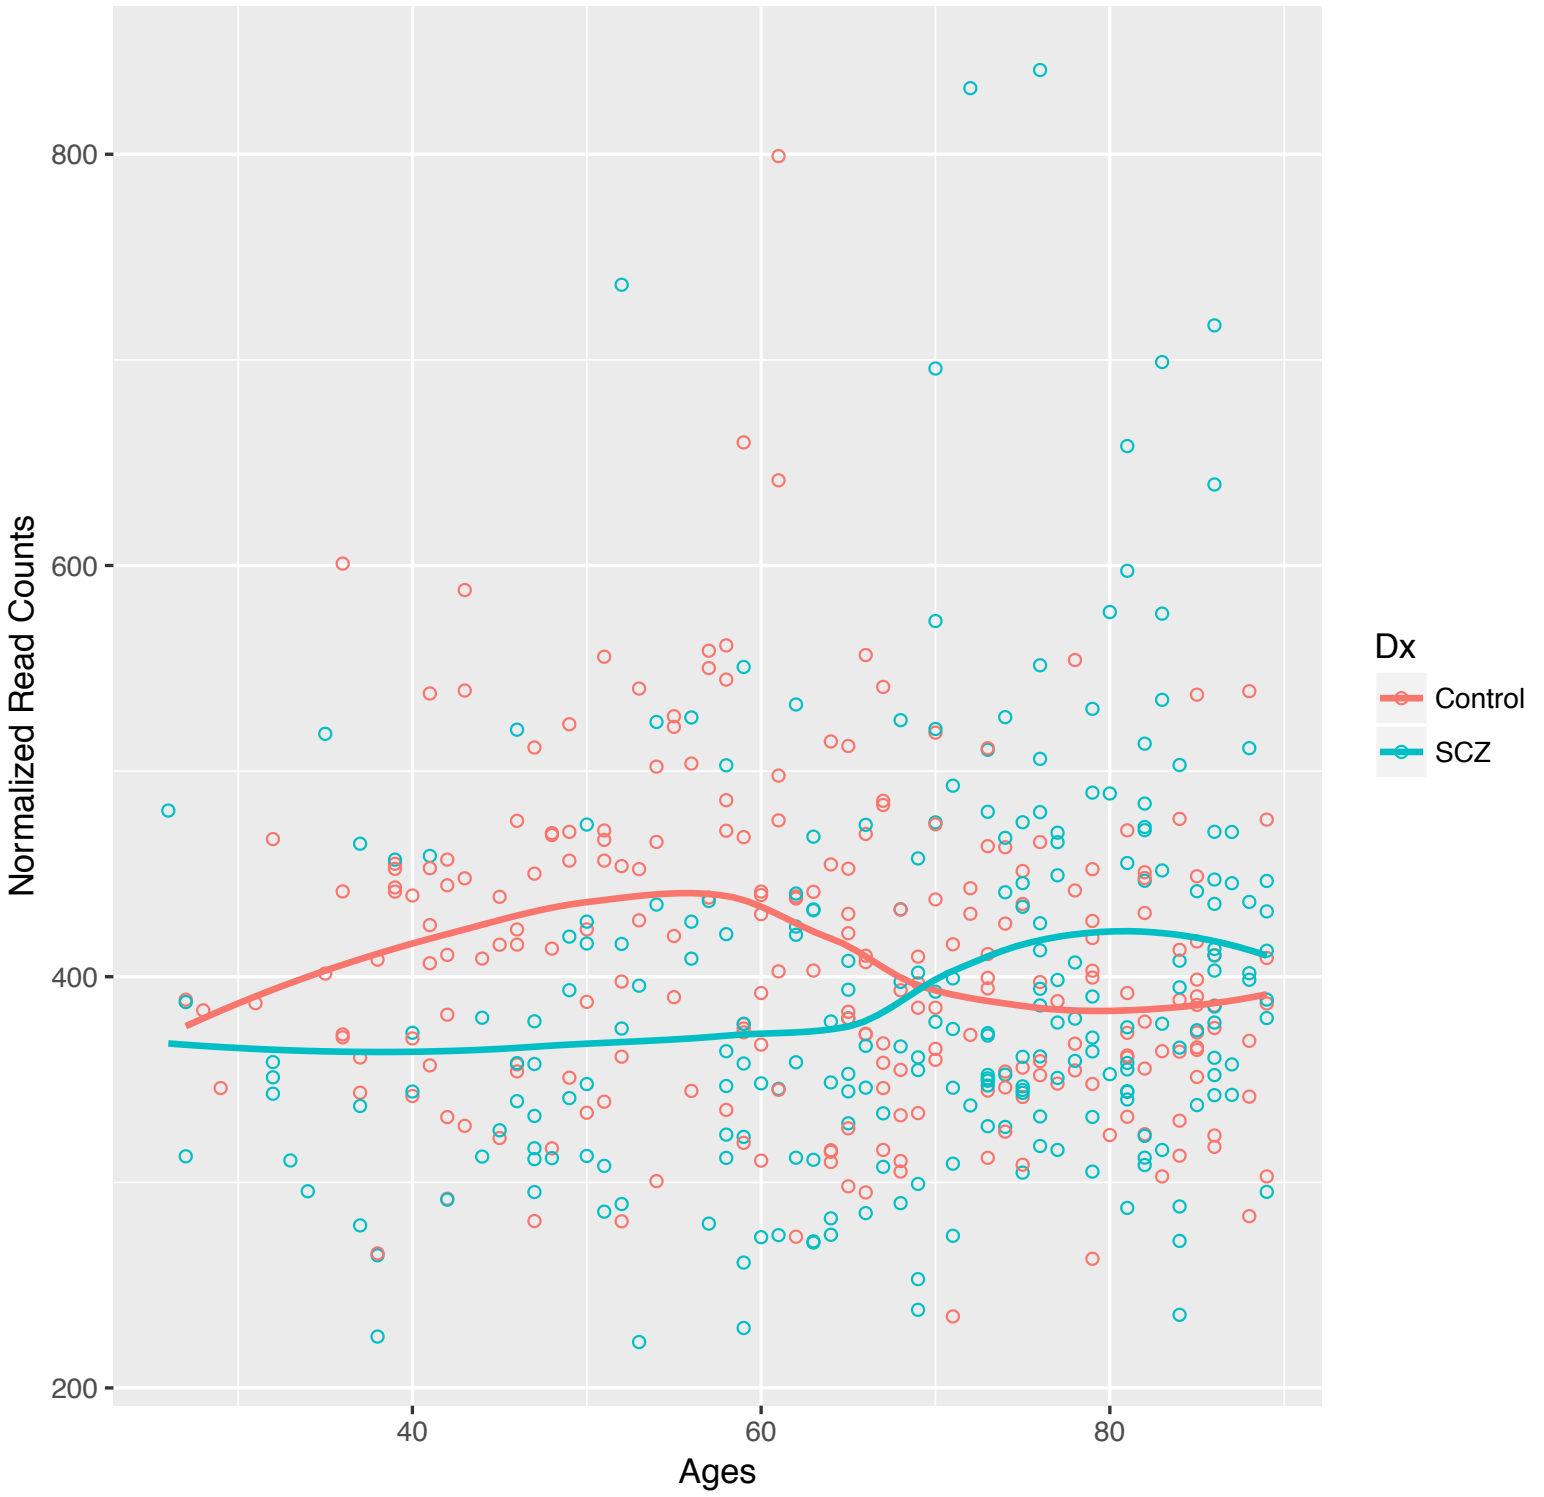

# COX6C

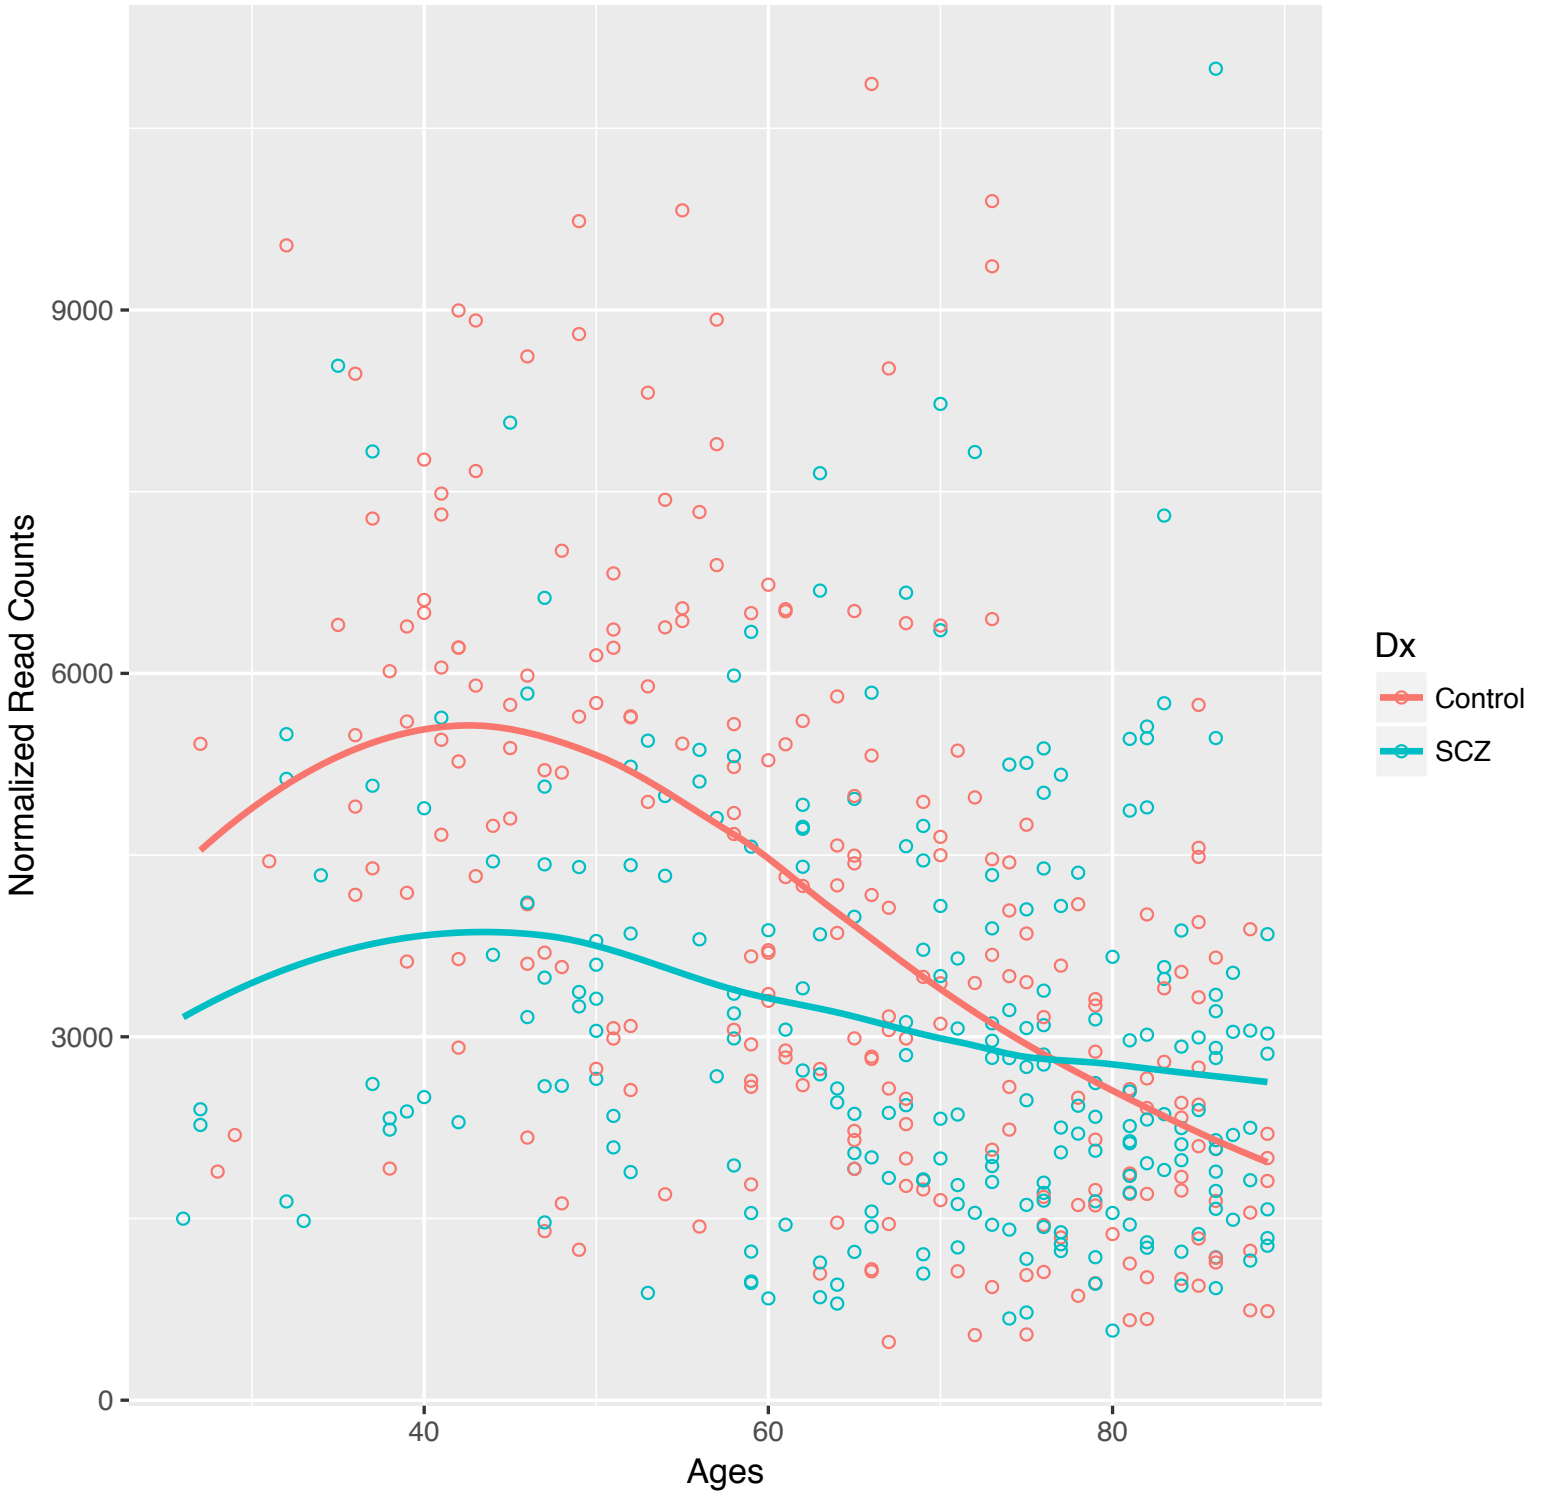

# PLK1

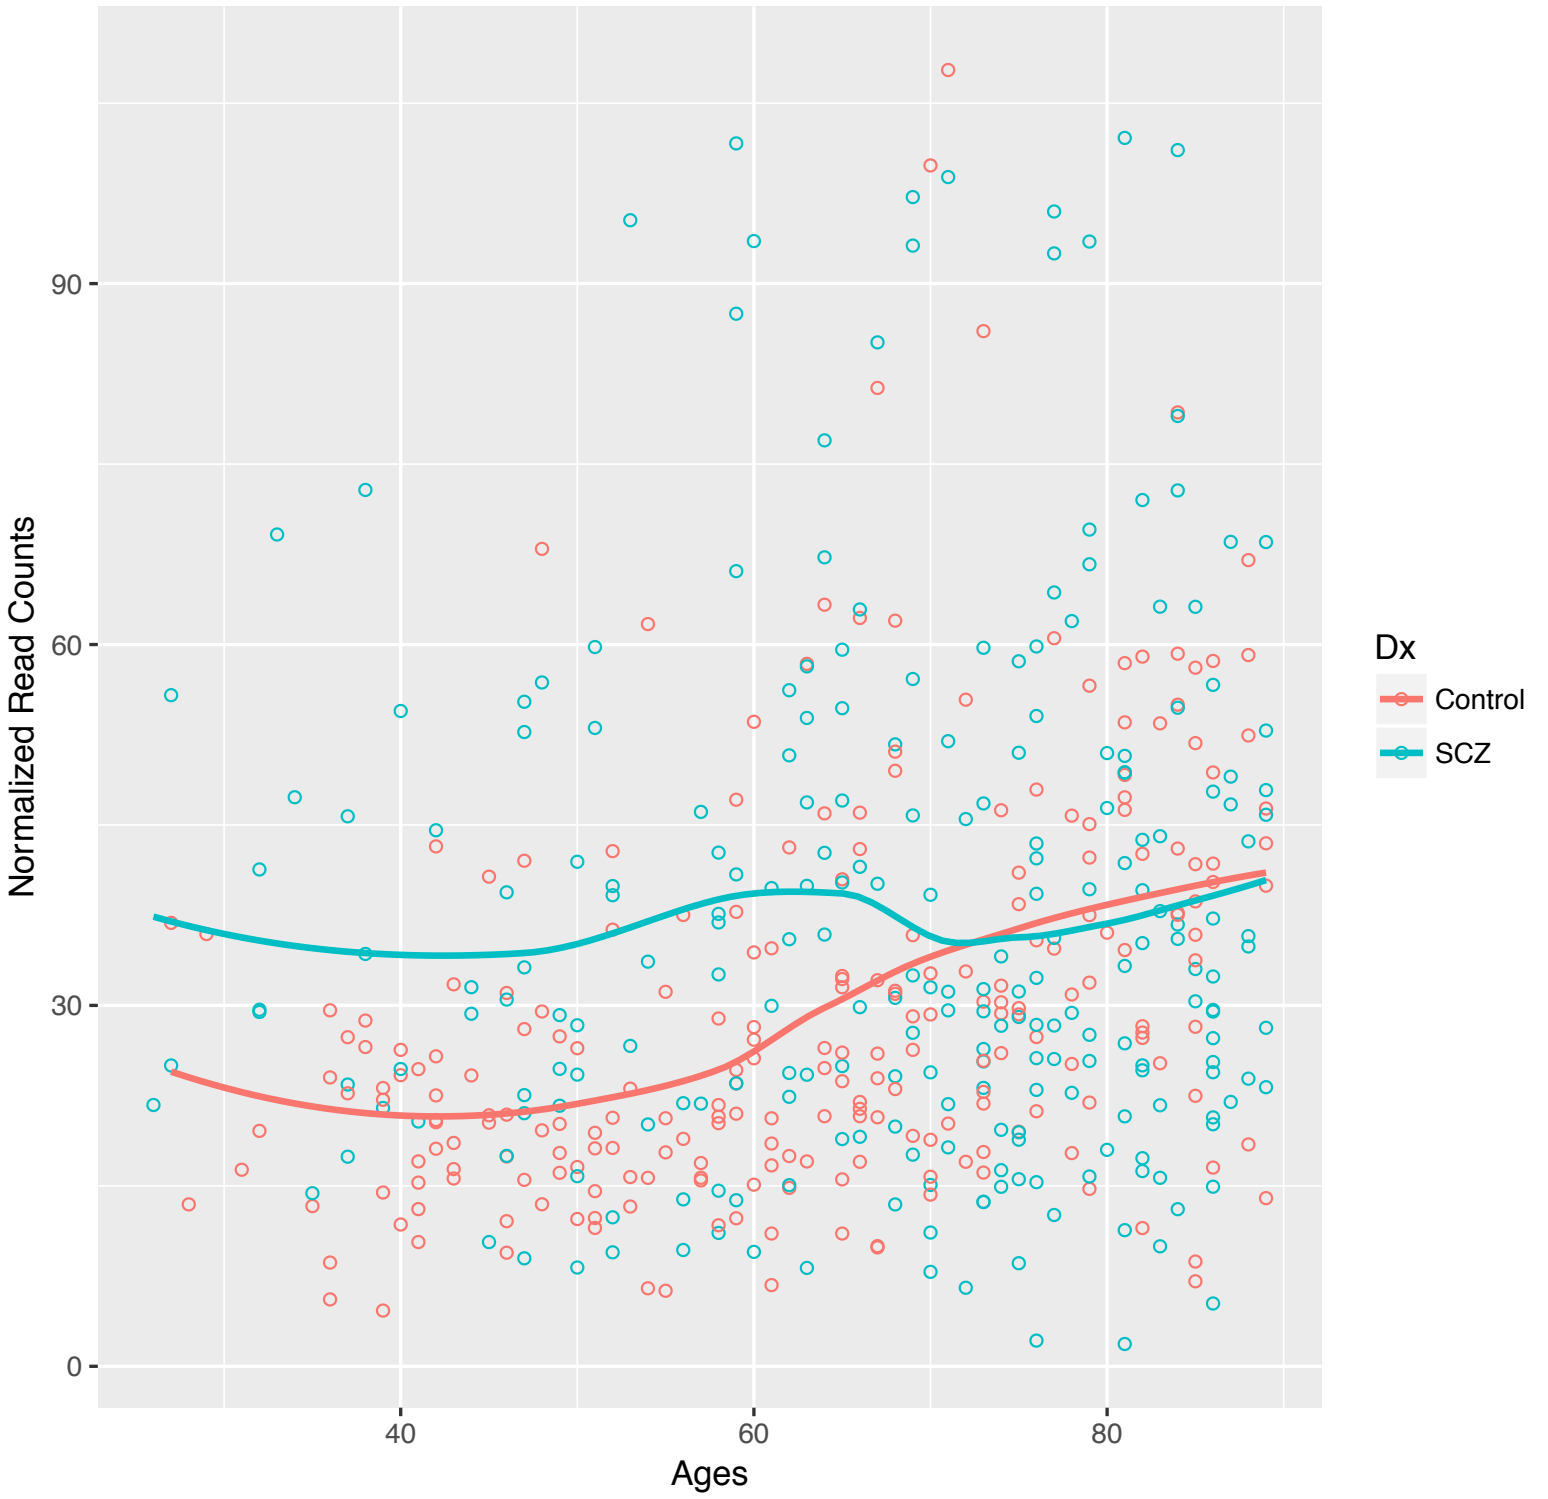



# ZNF491

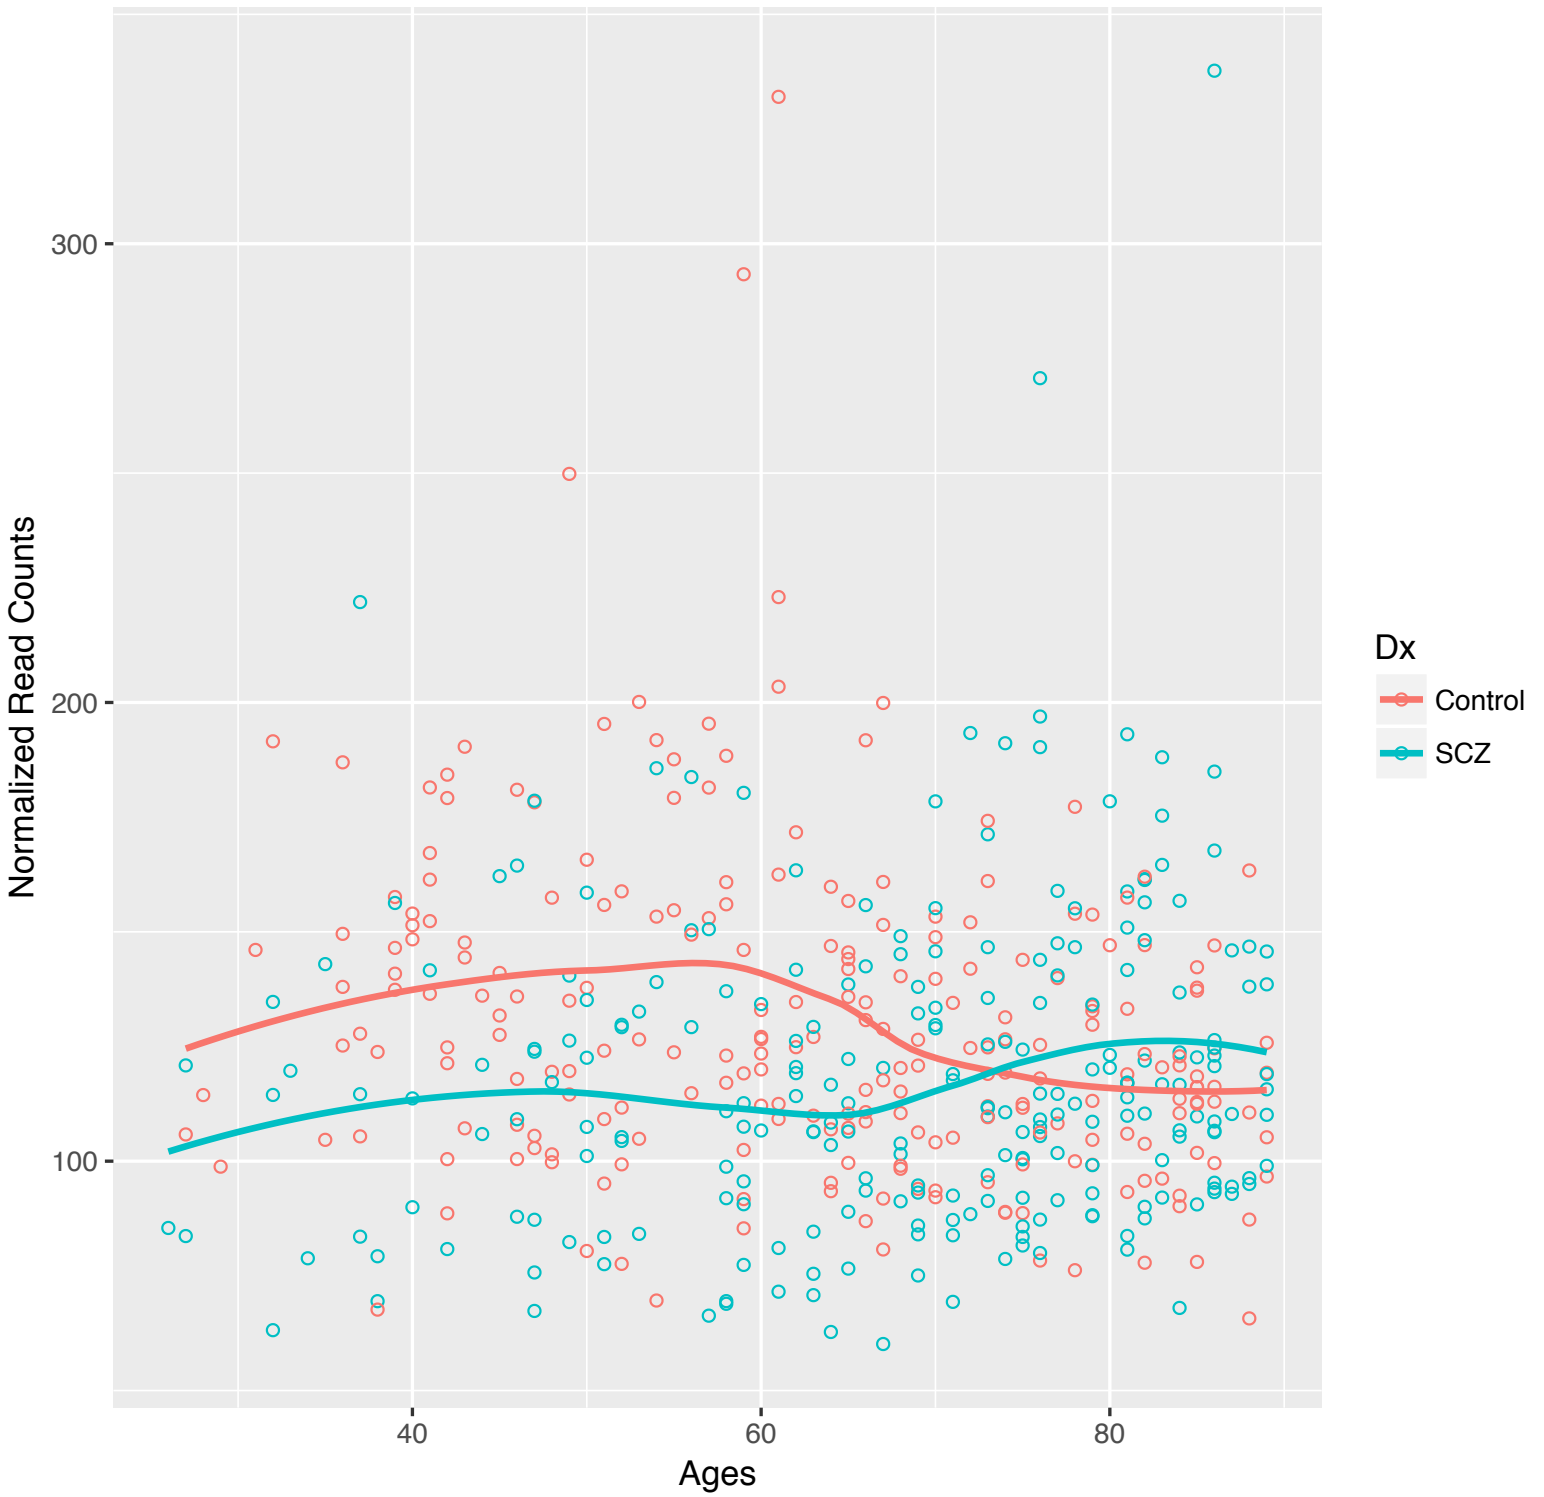

# FANCB

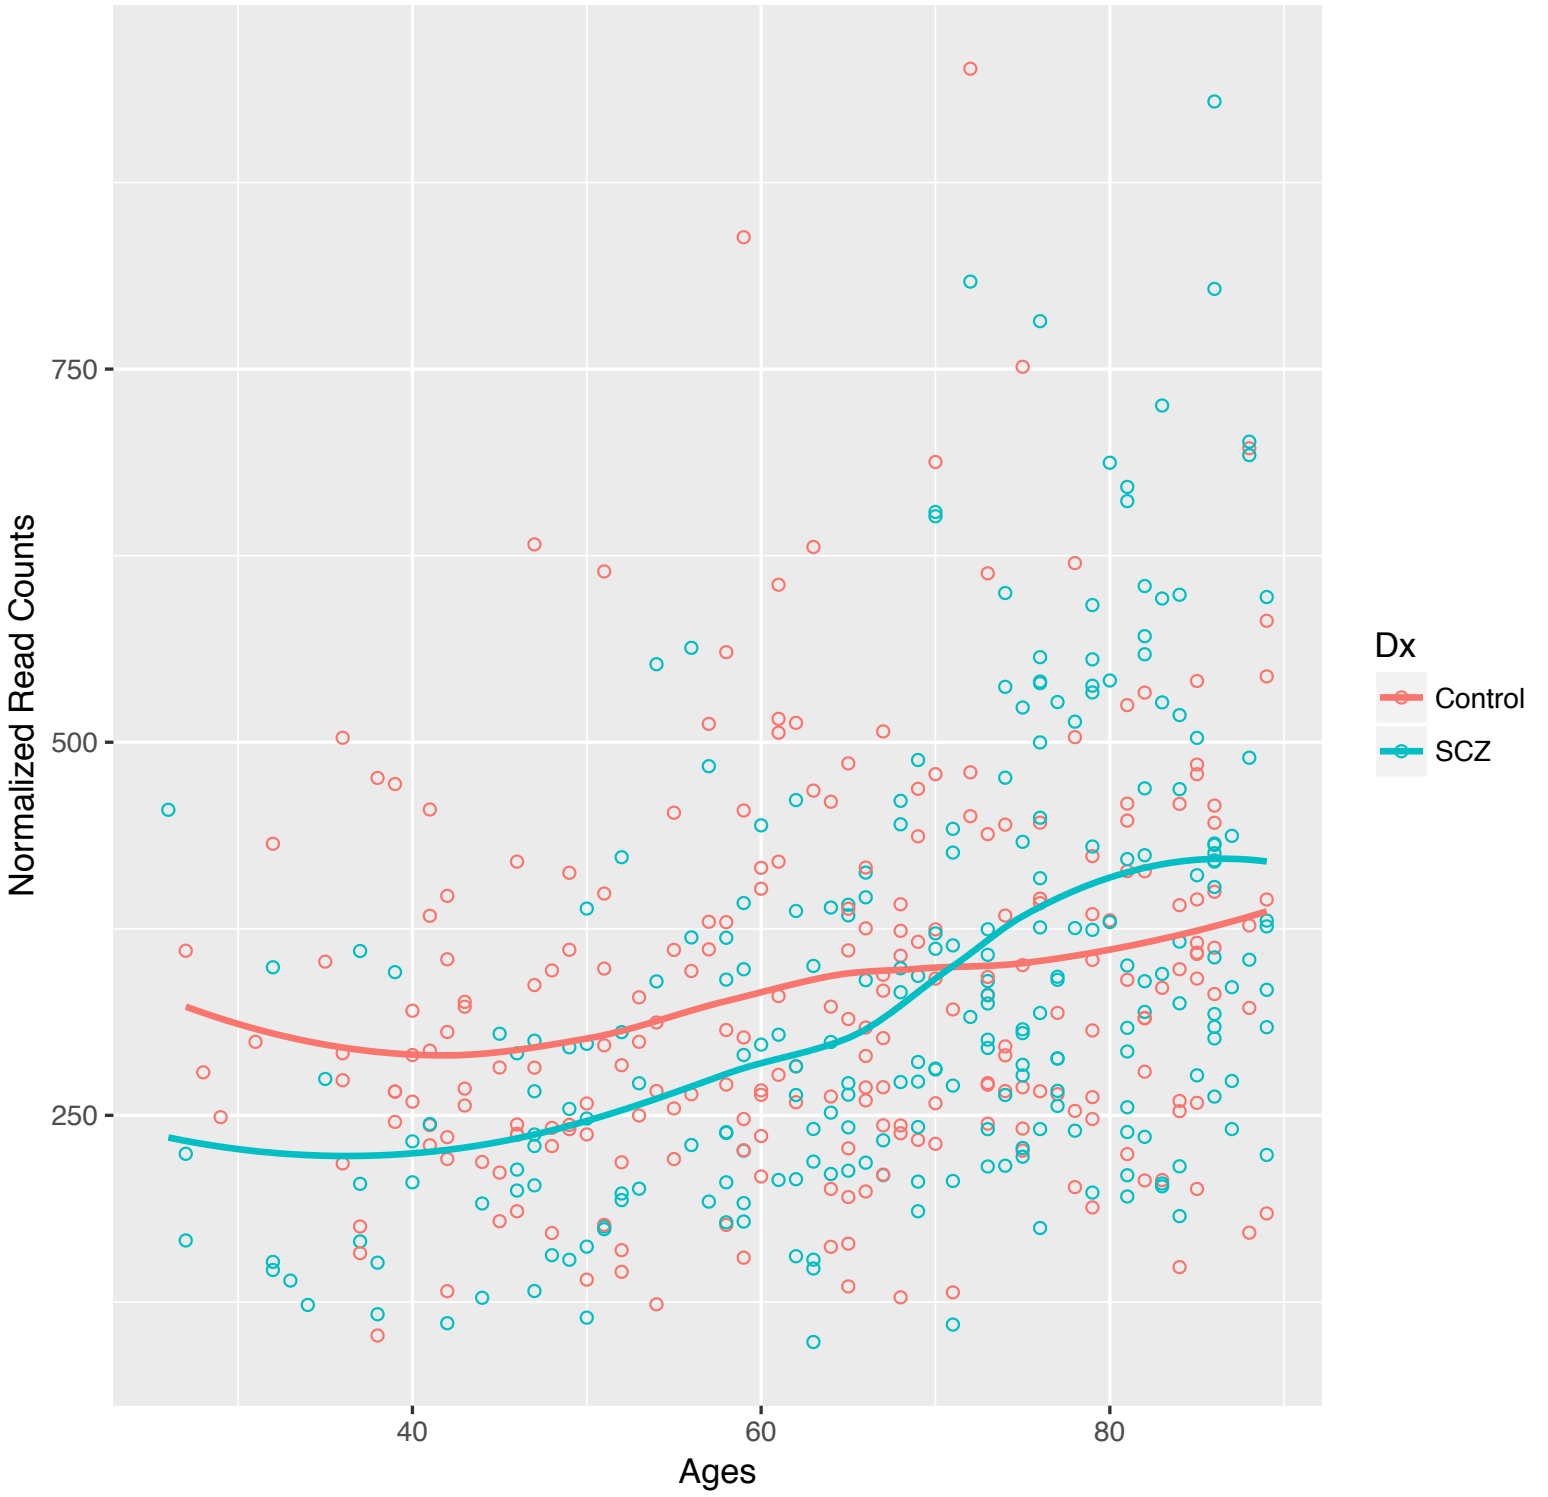

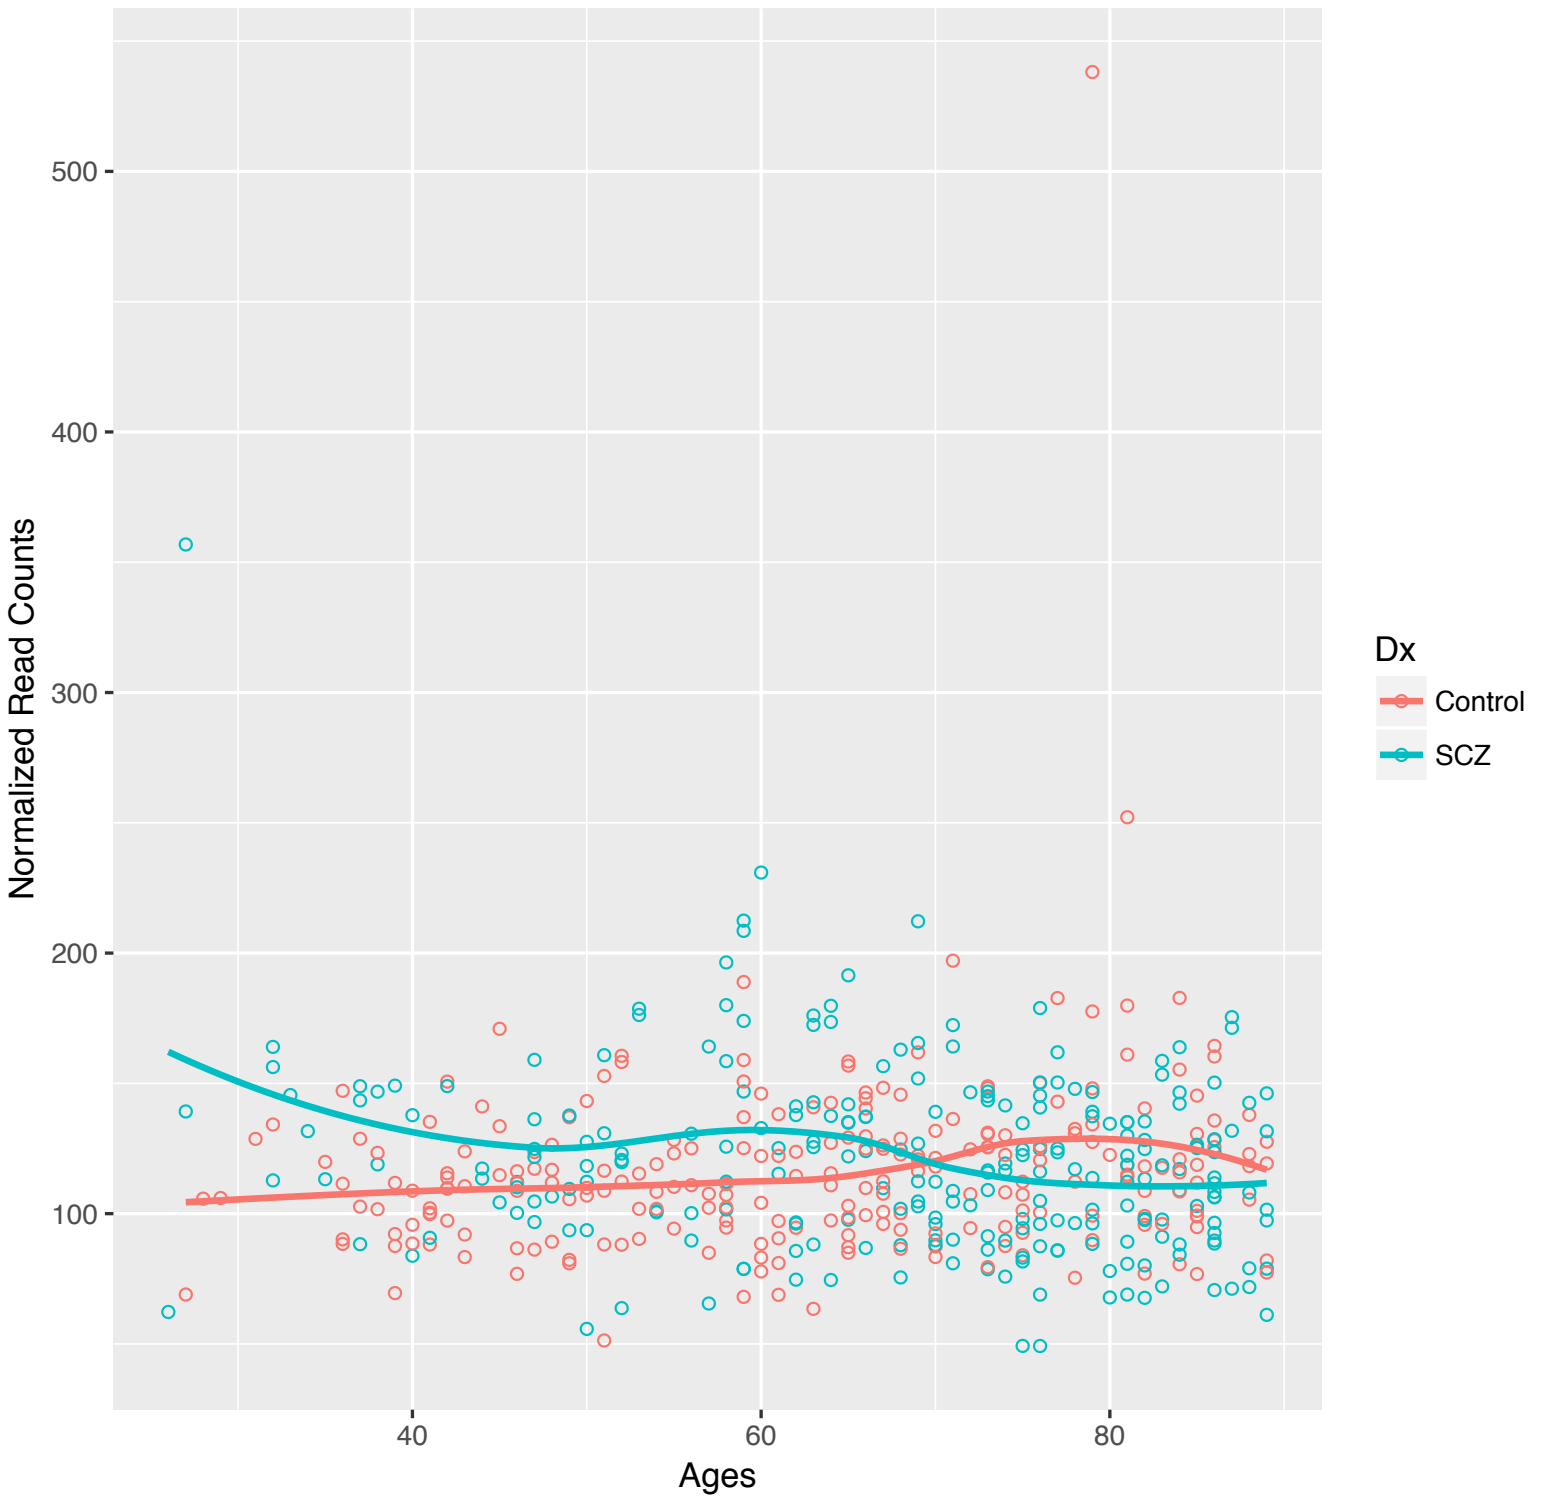

# ATG12P2

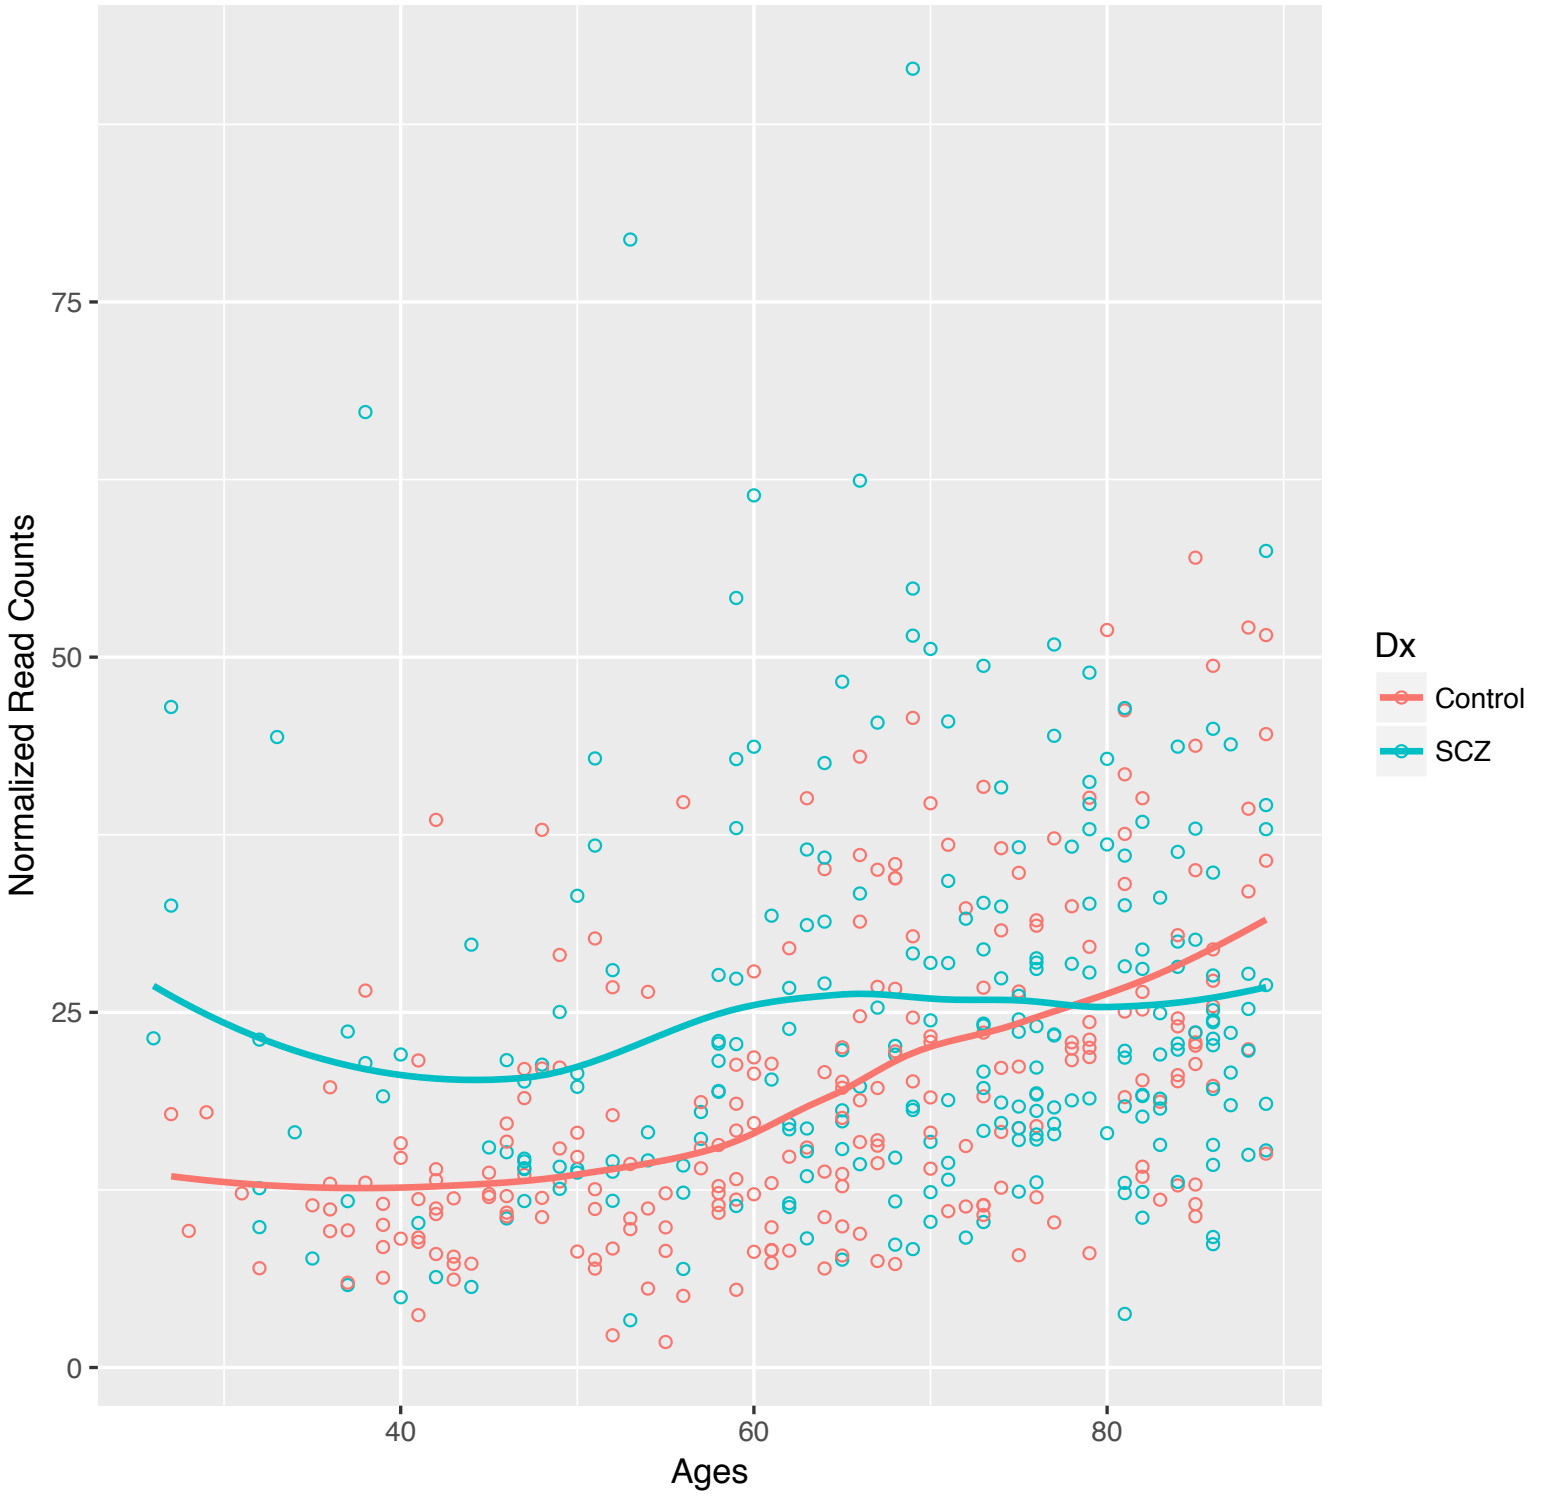

# DNM1P51

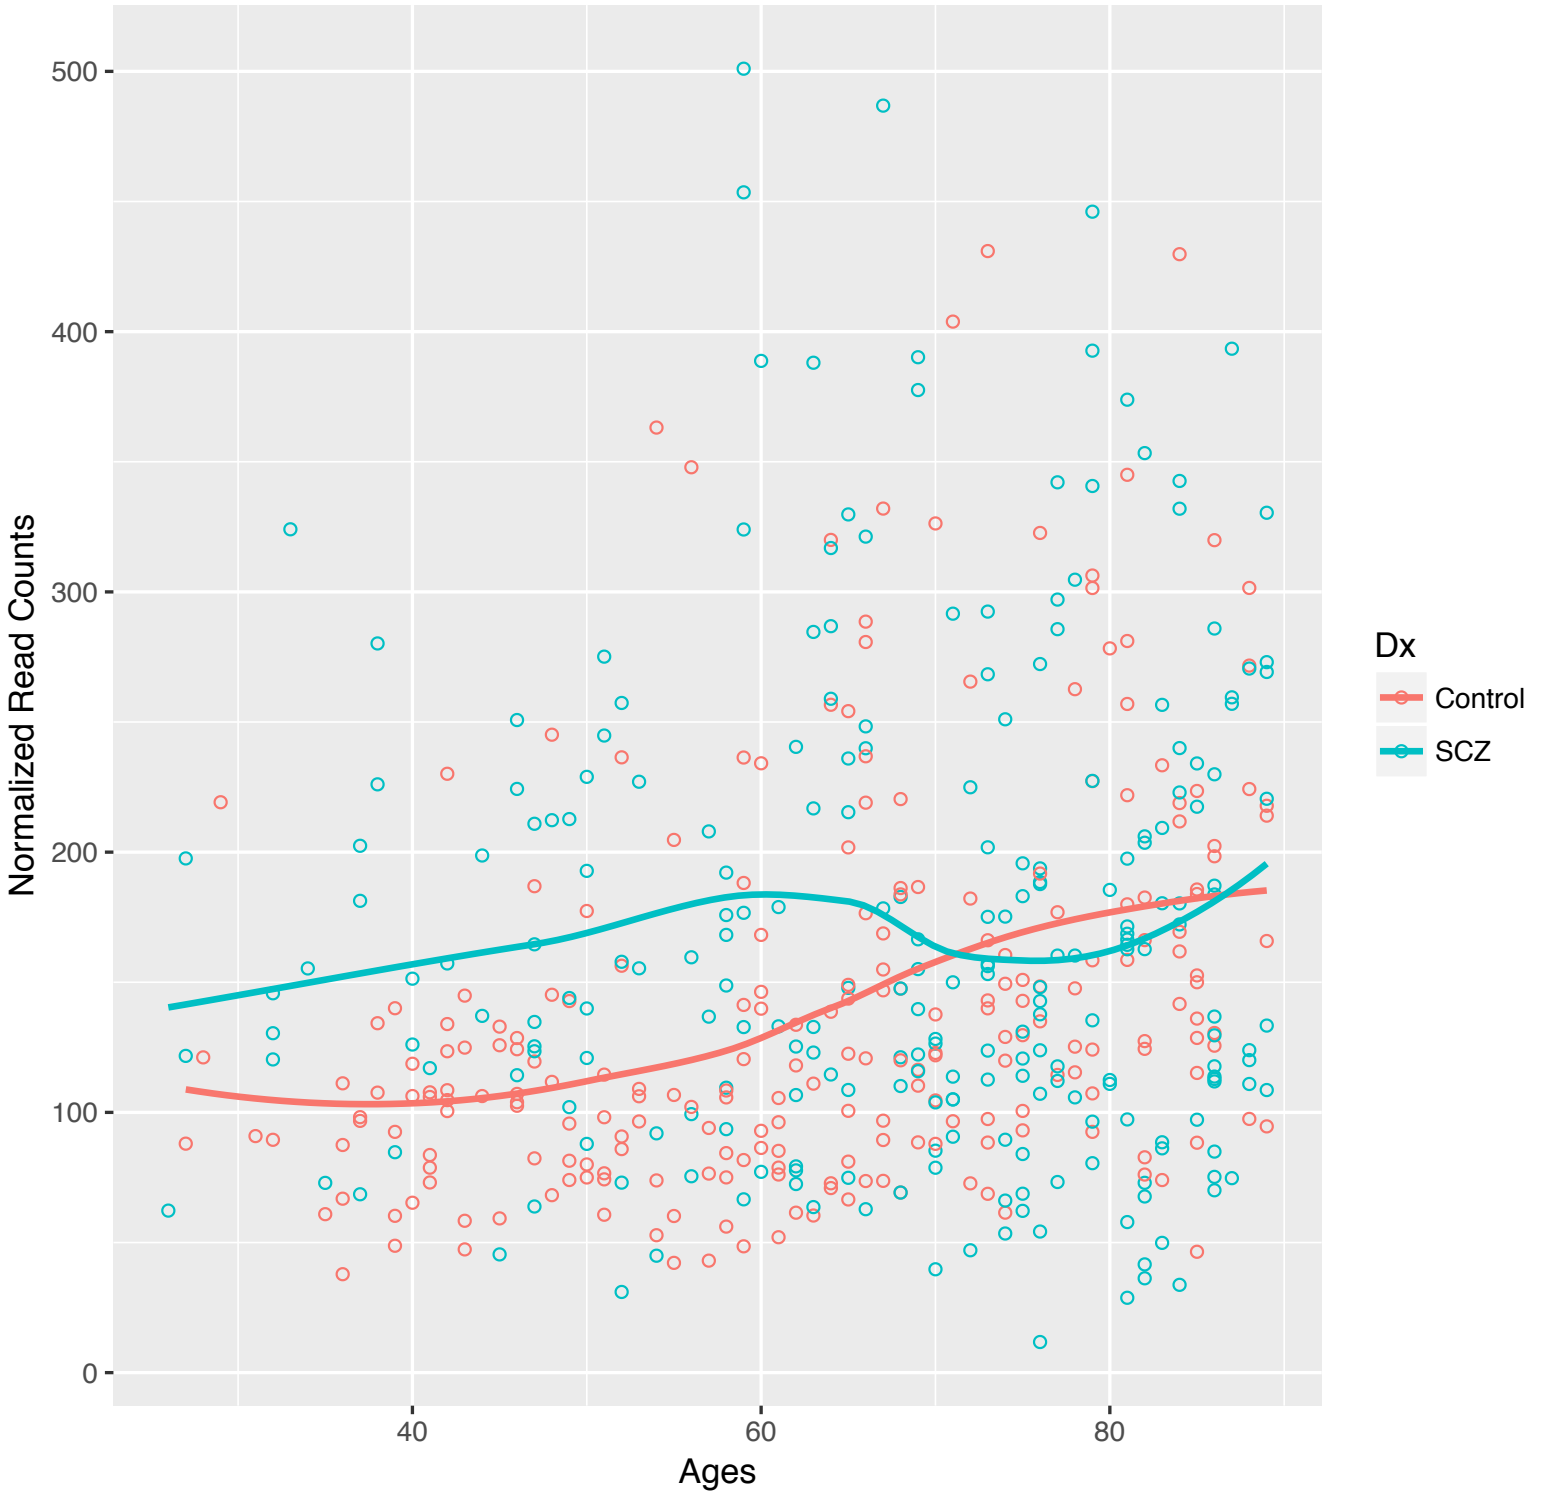

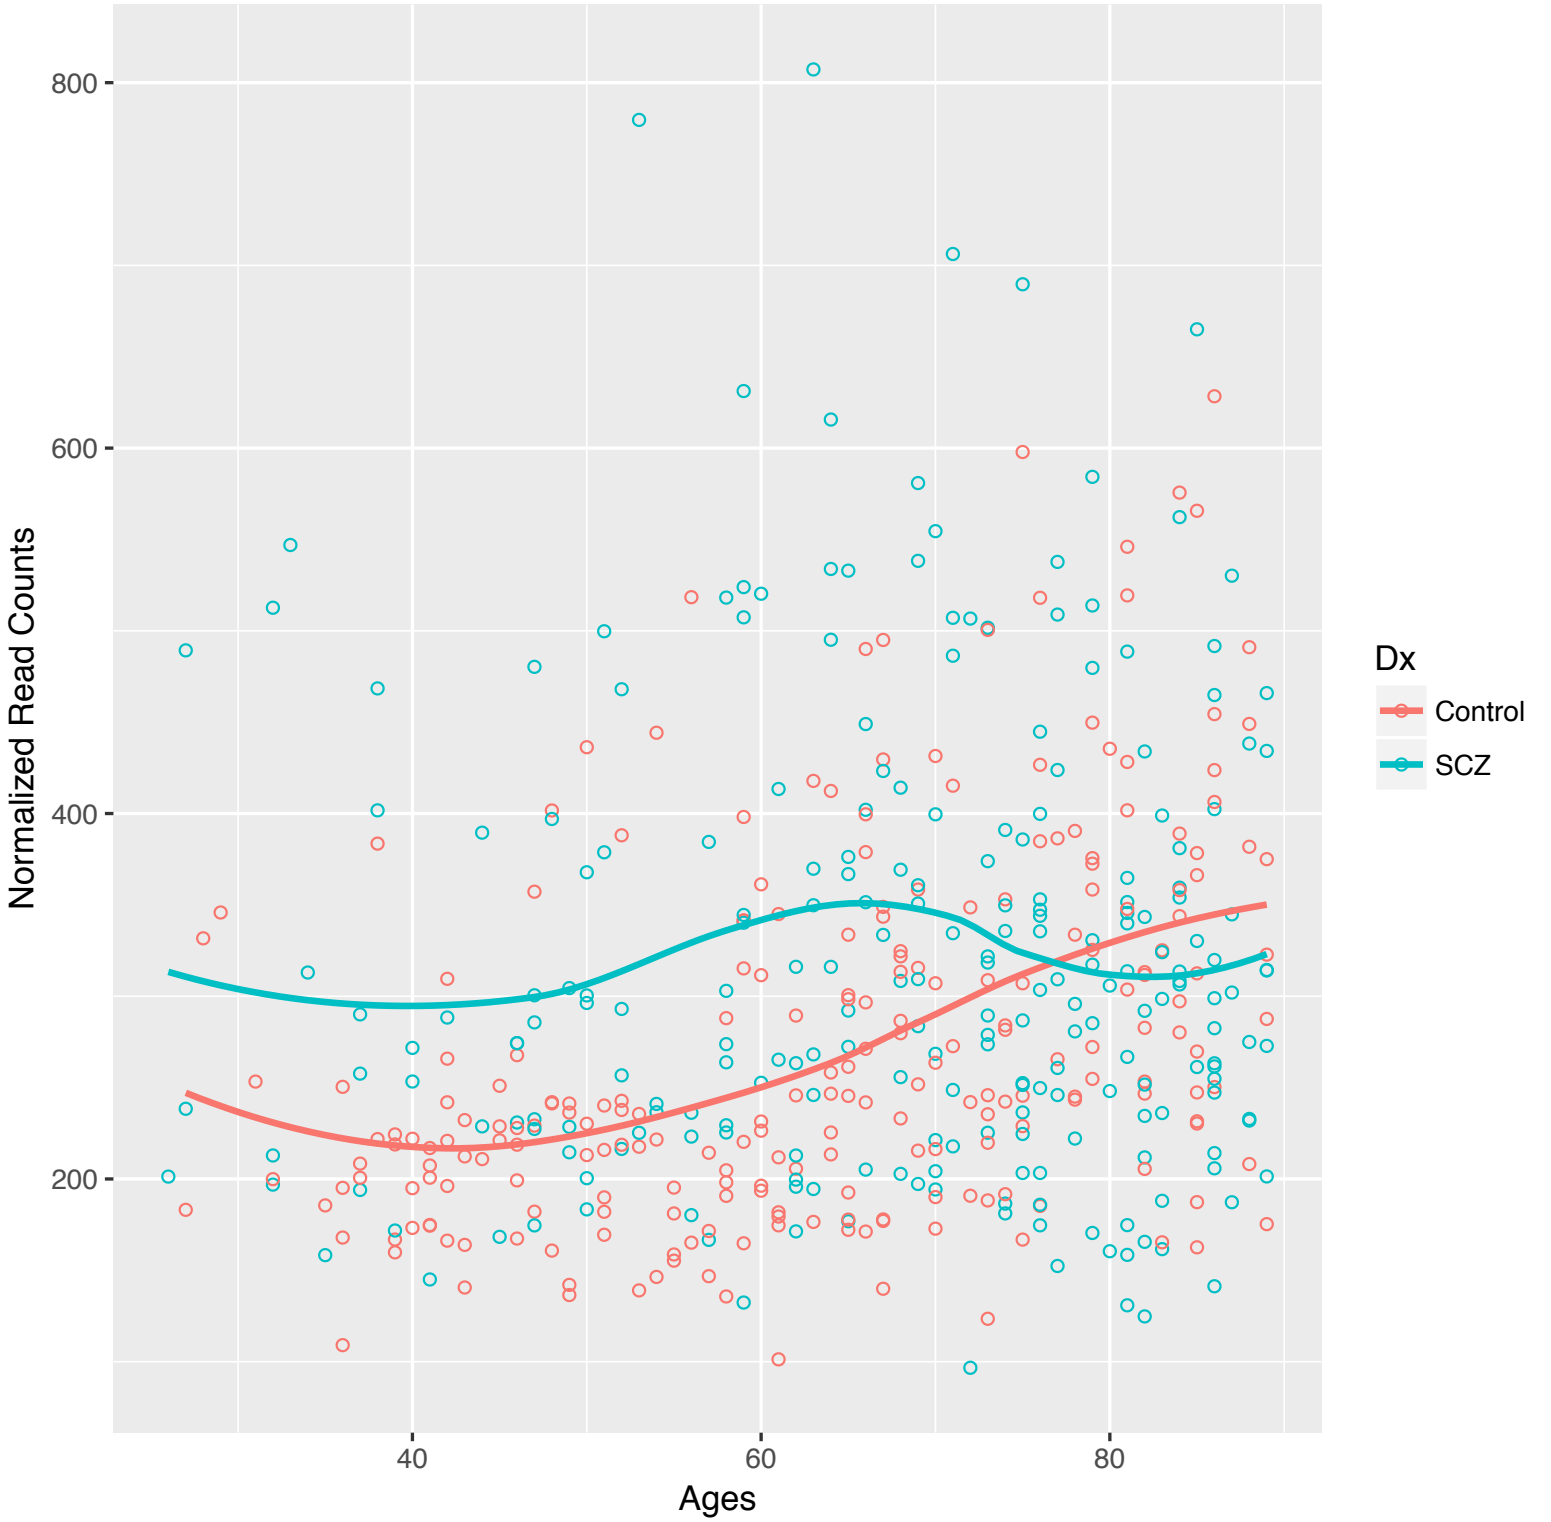

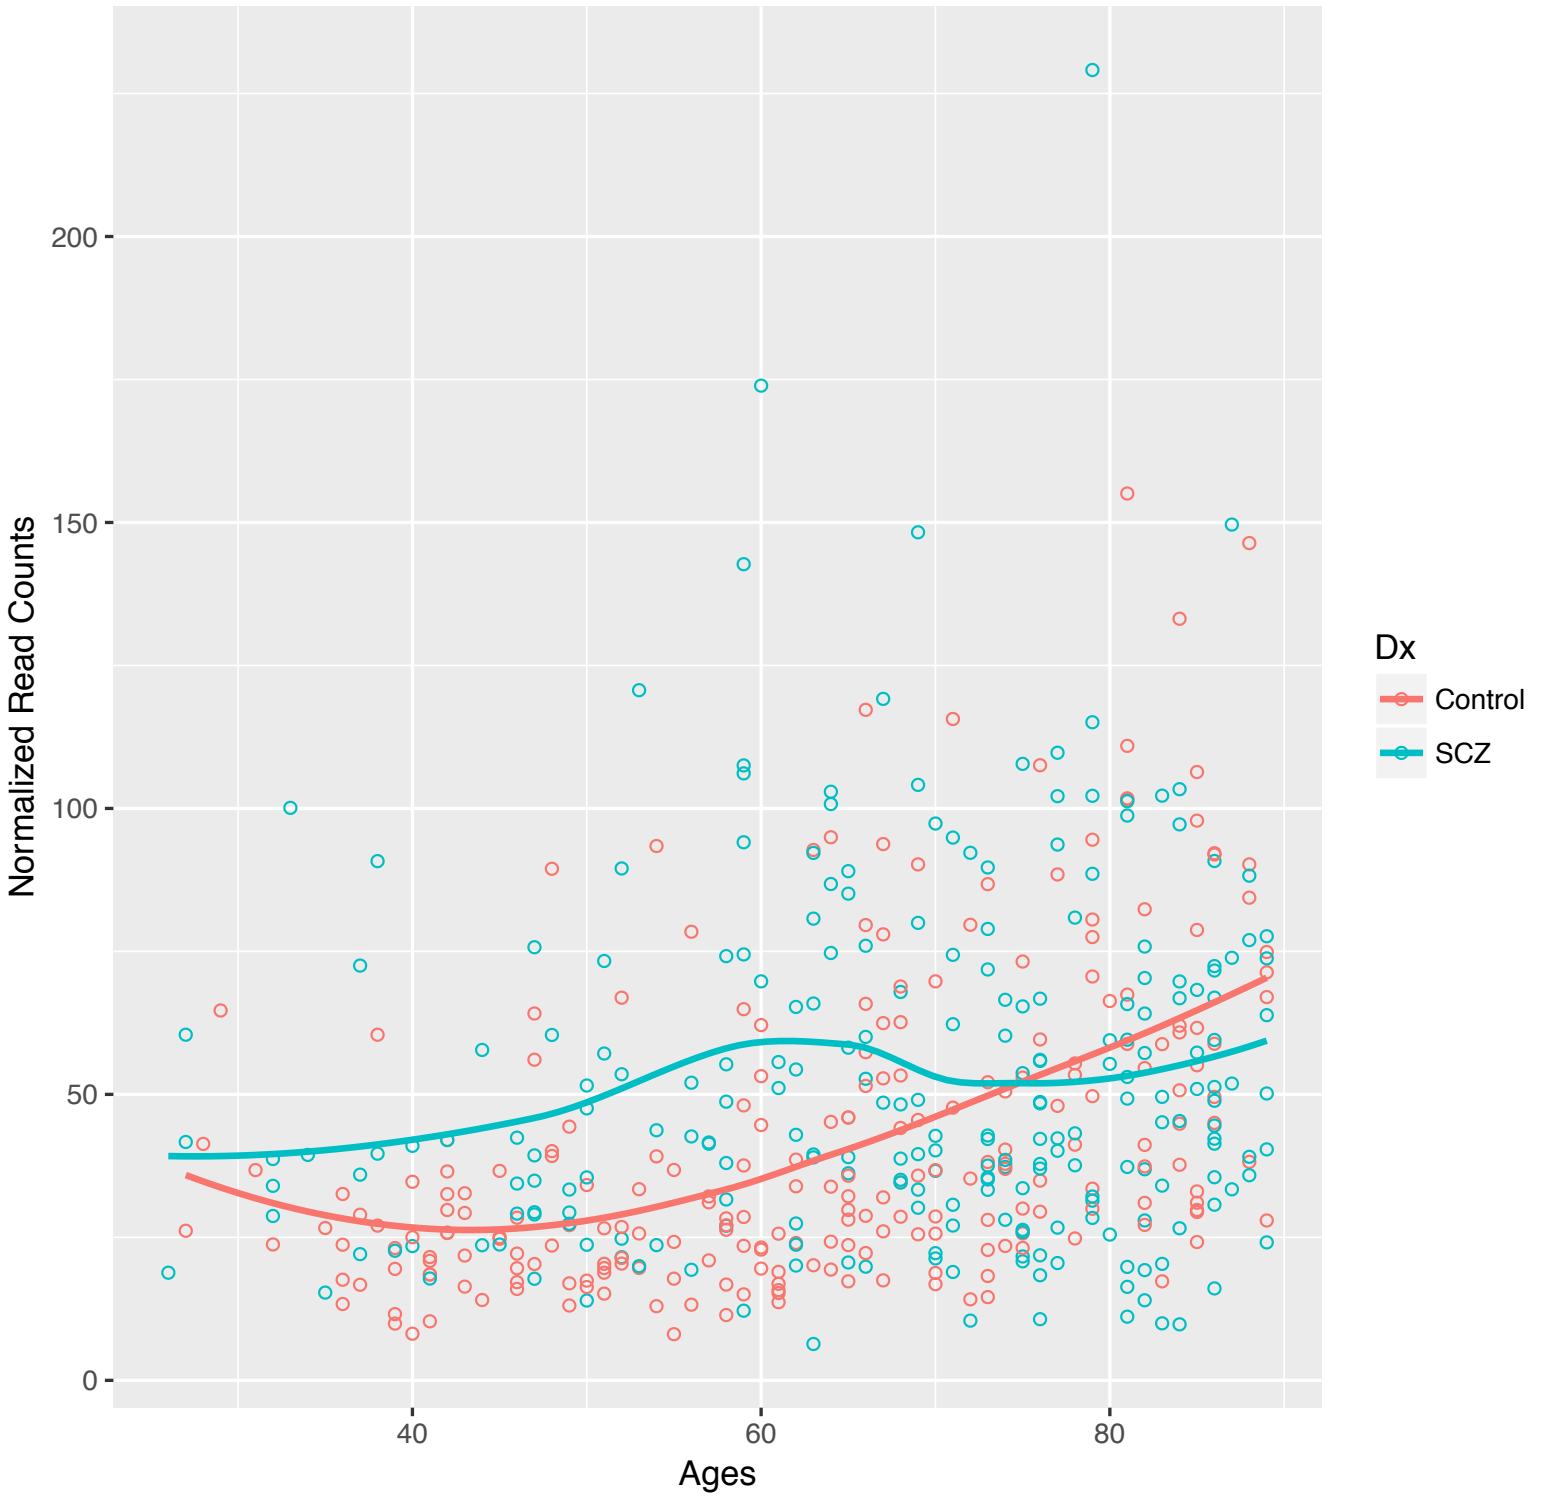

# FLNB

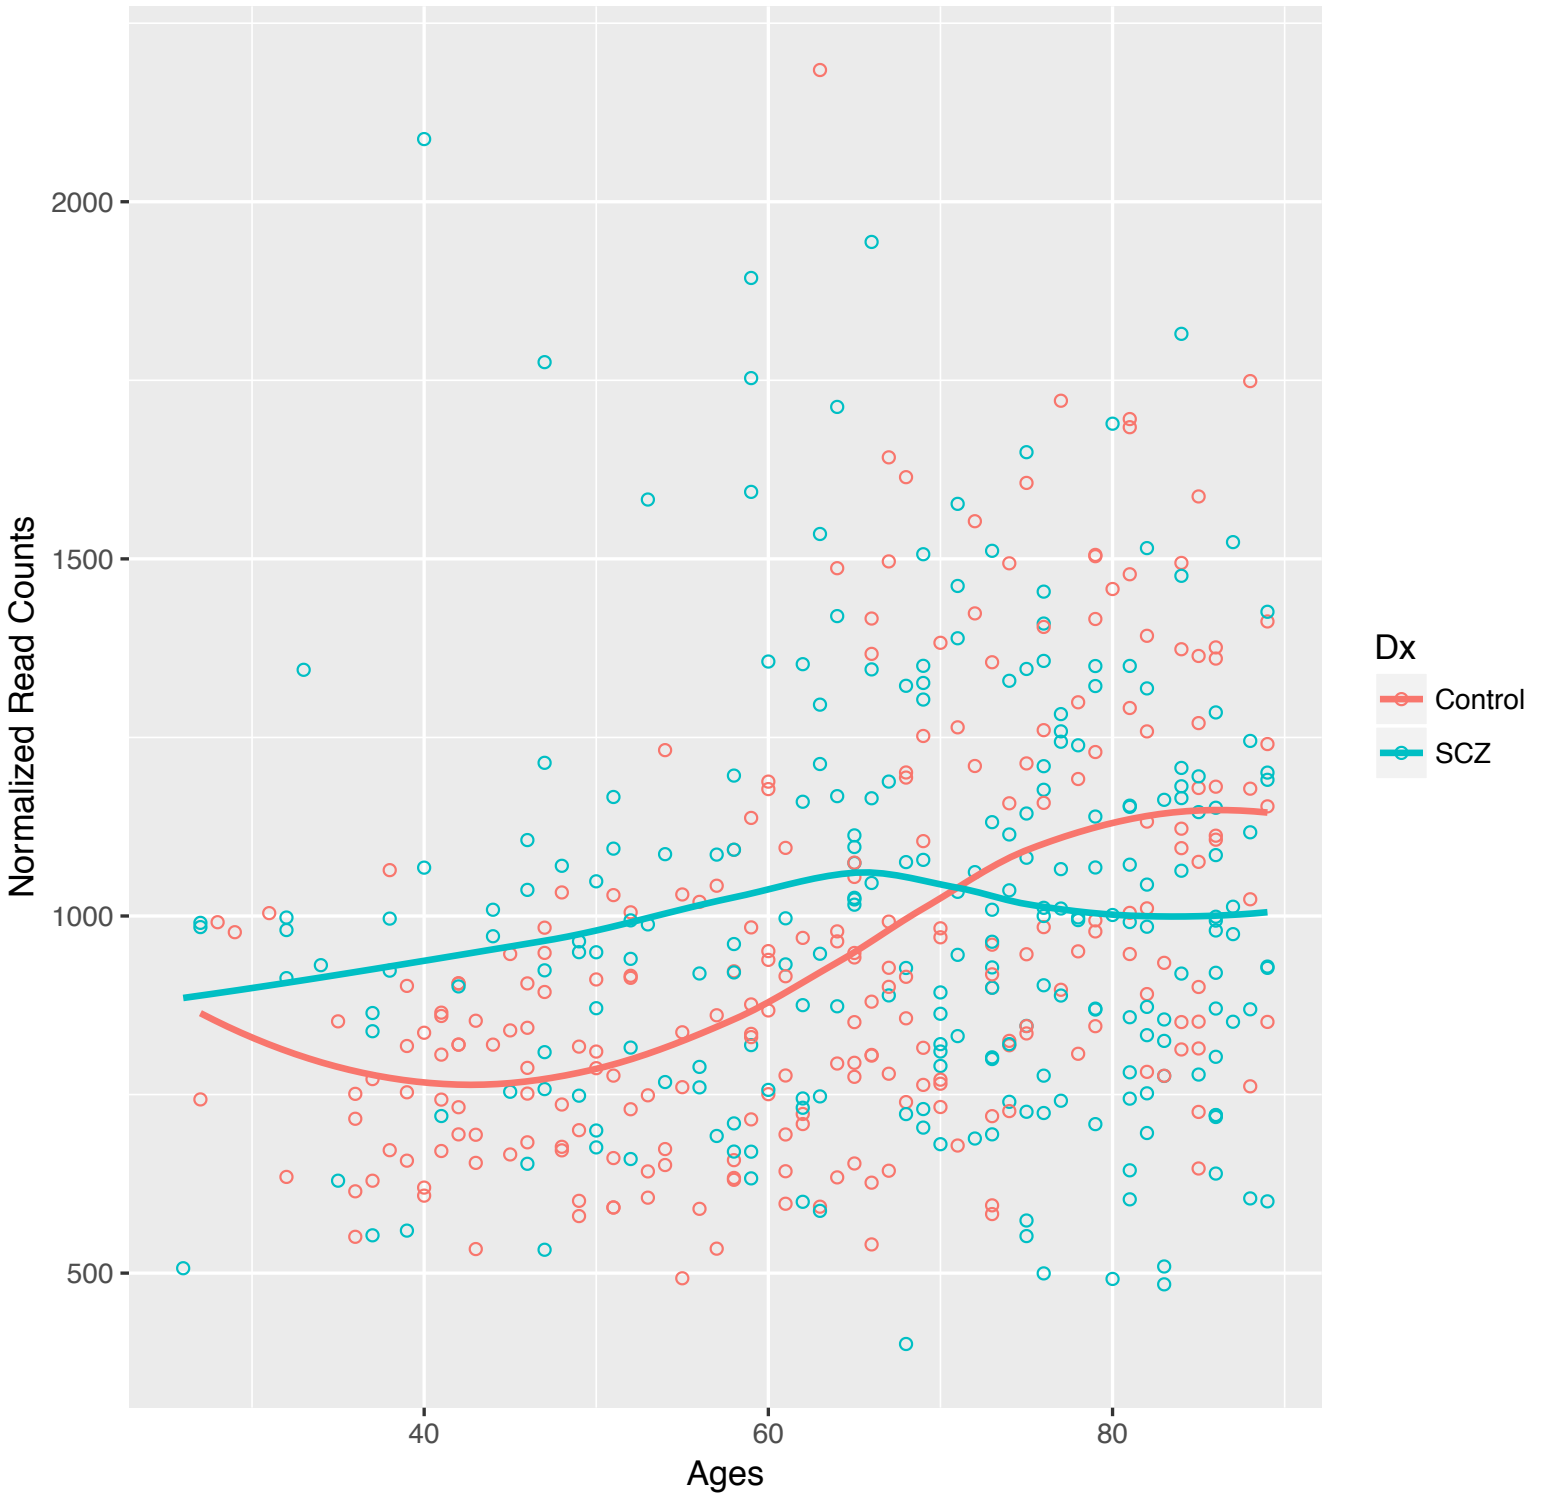



# CSMD2

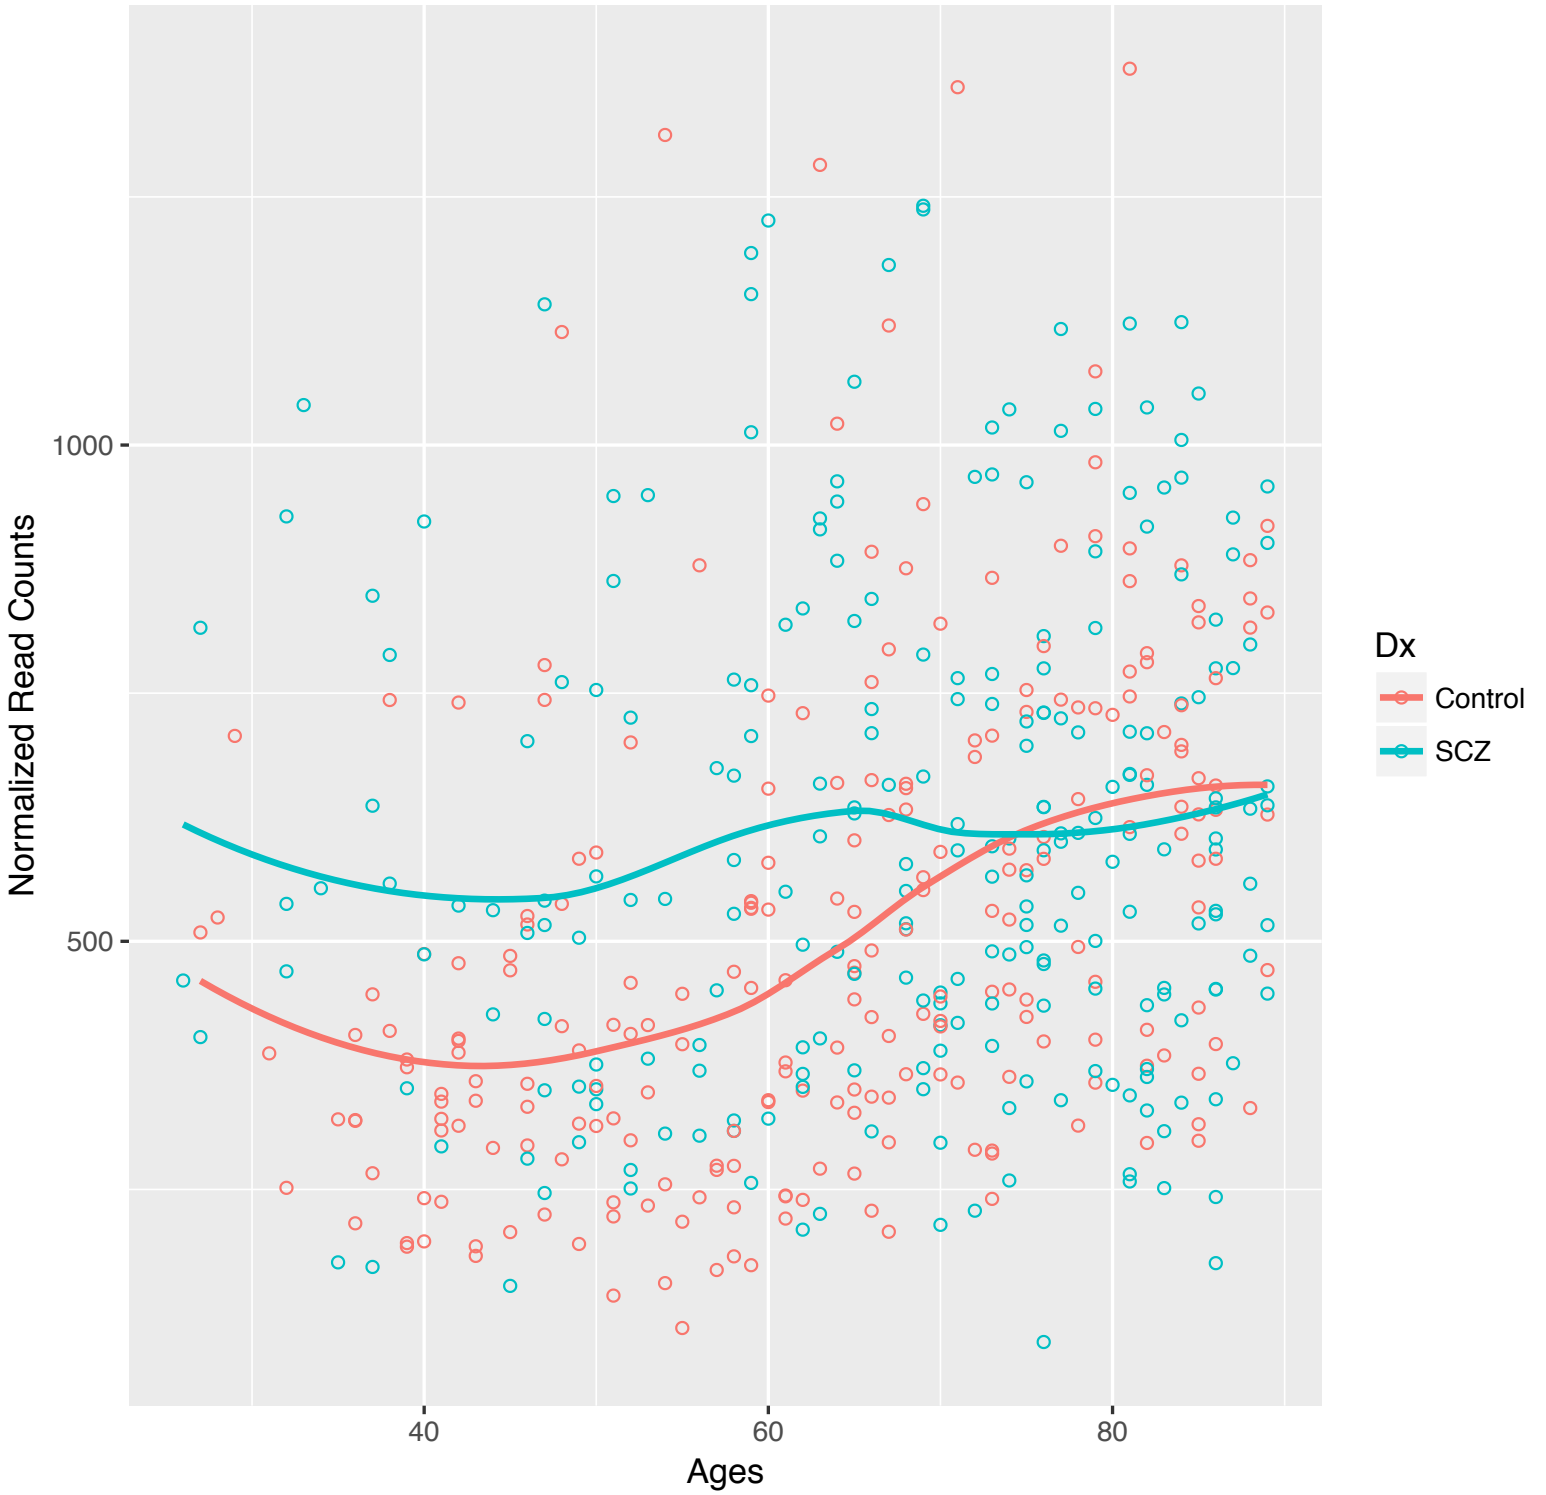

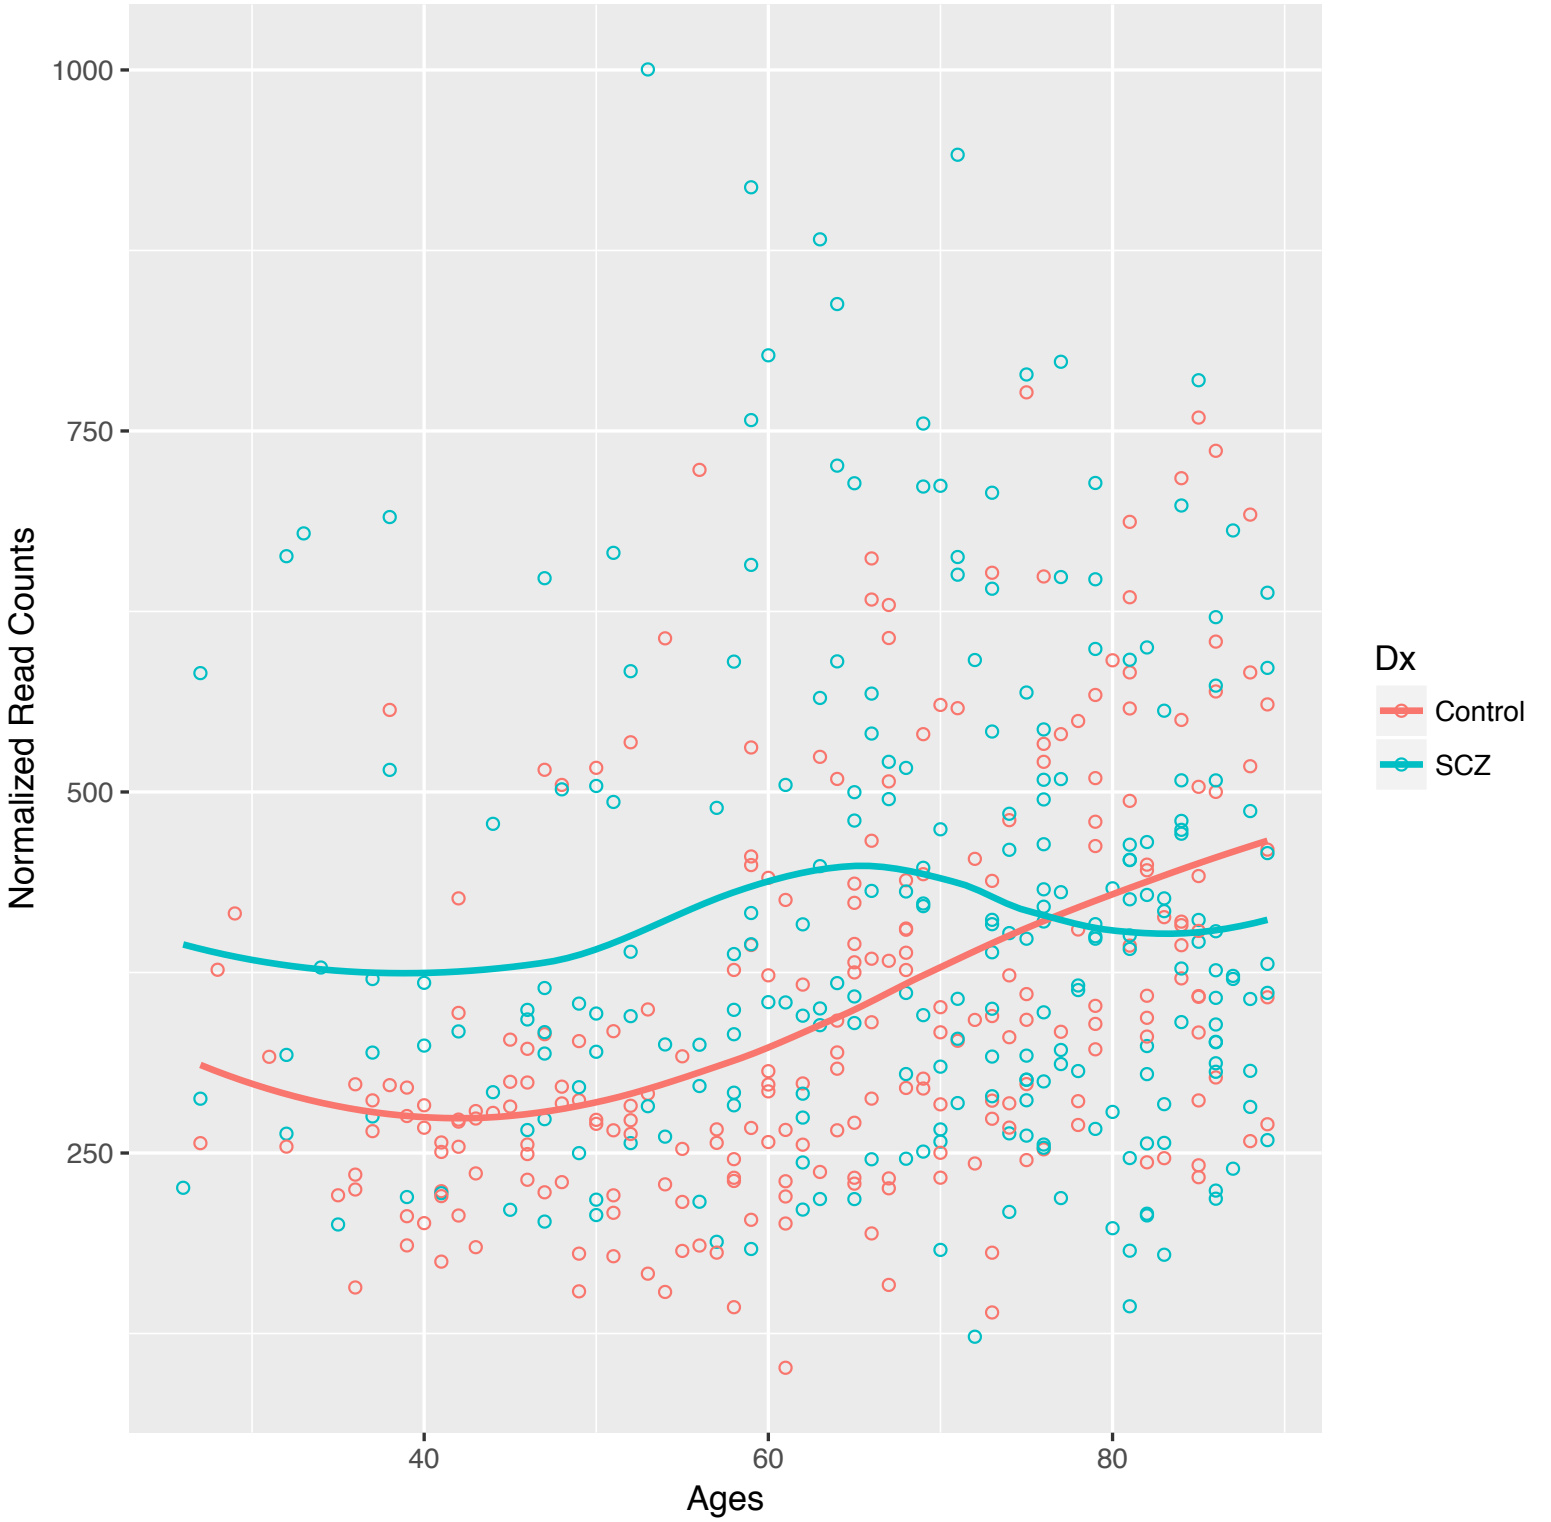

# ANXA11

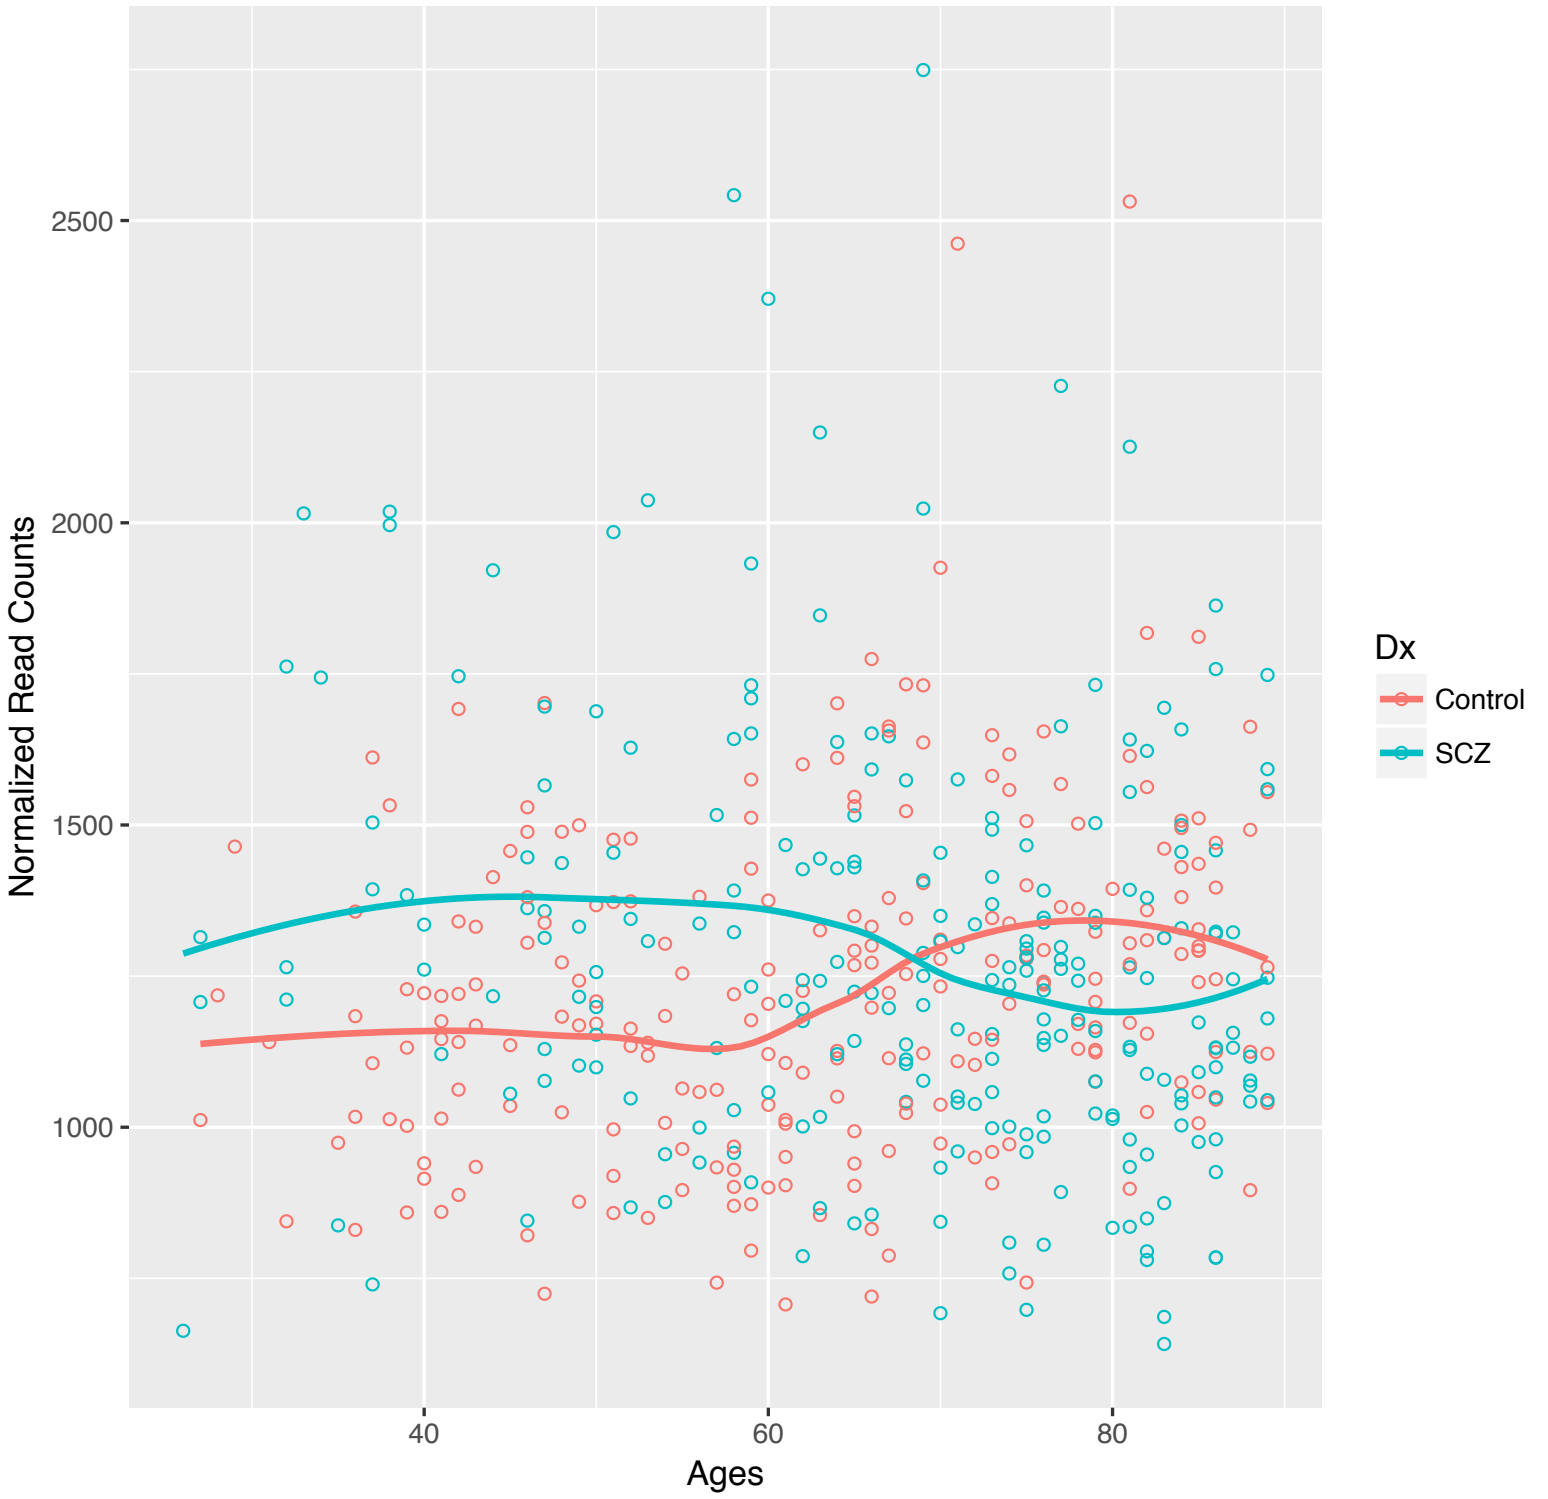

# IL18BP

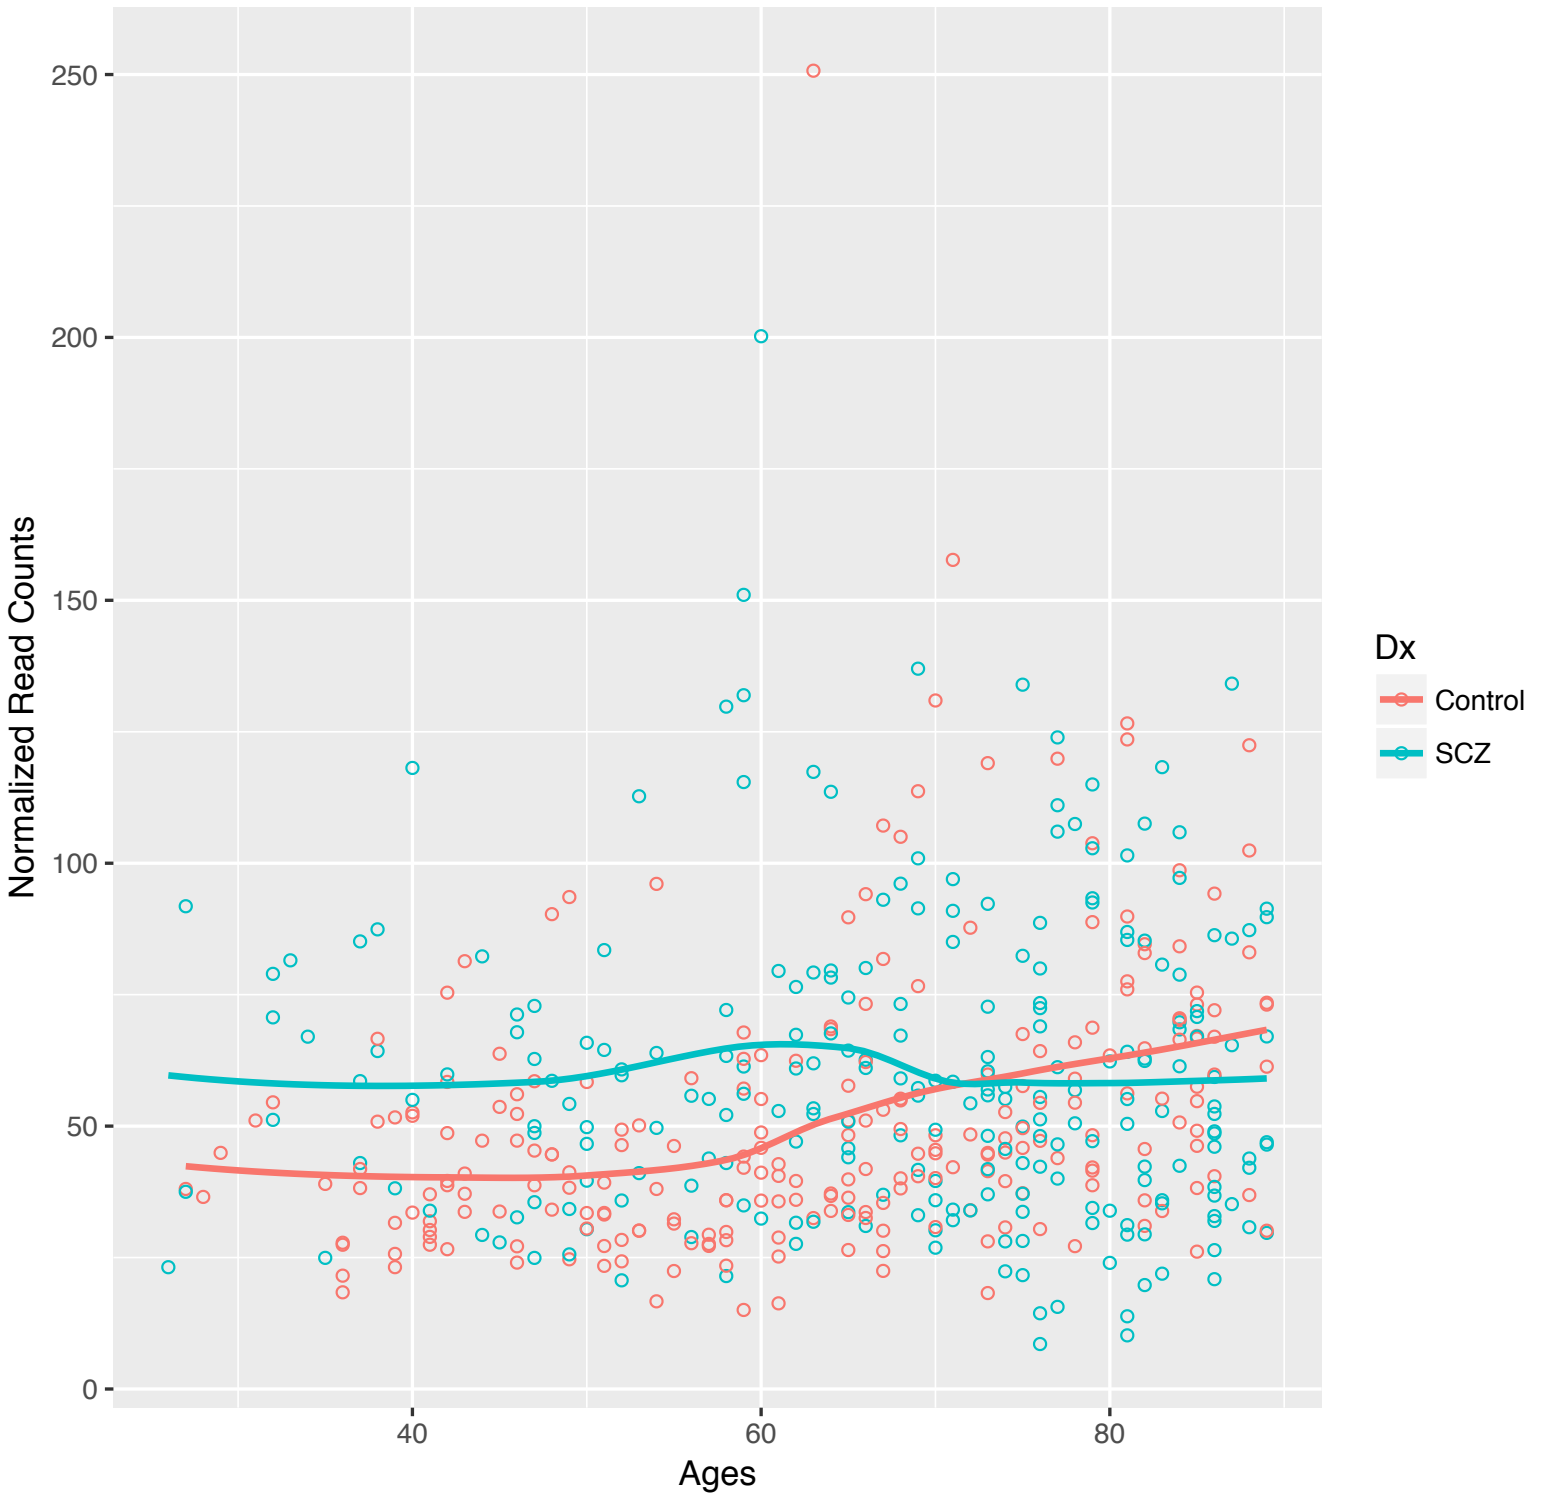

# CTSA

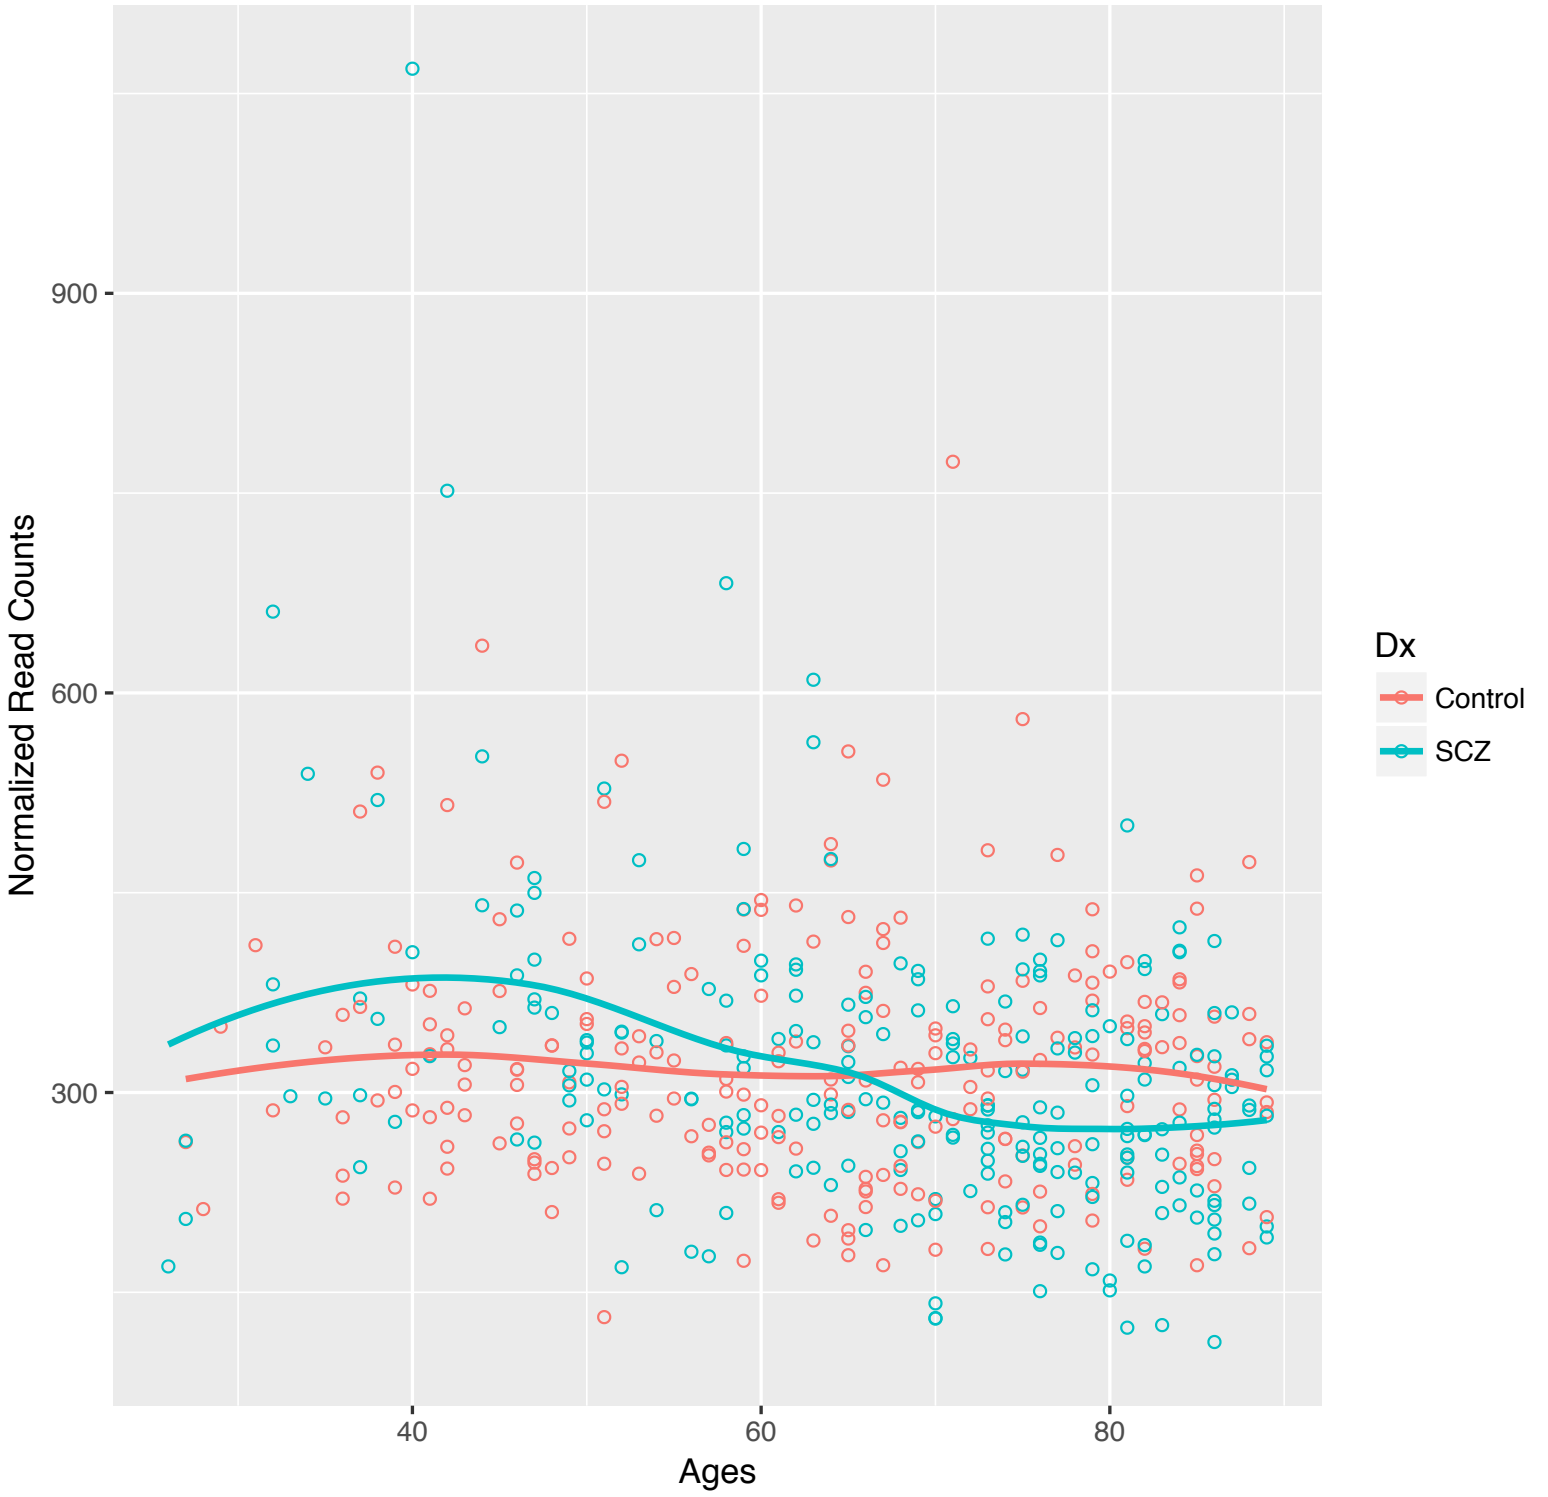

# SMG6

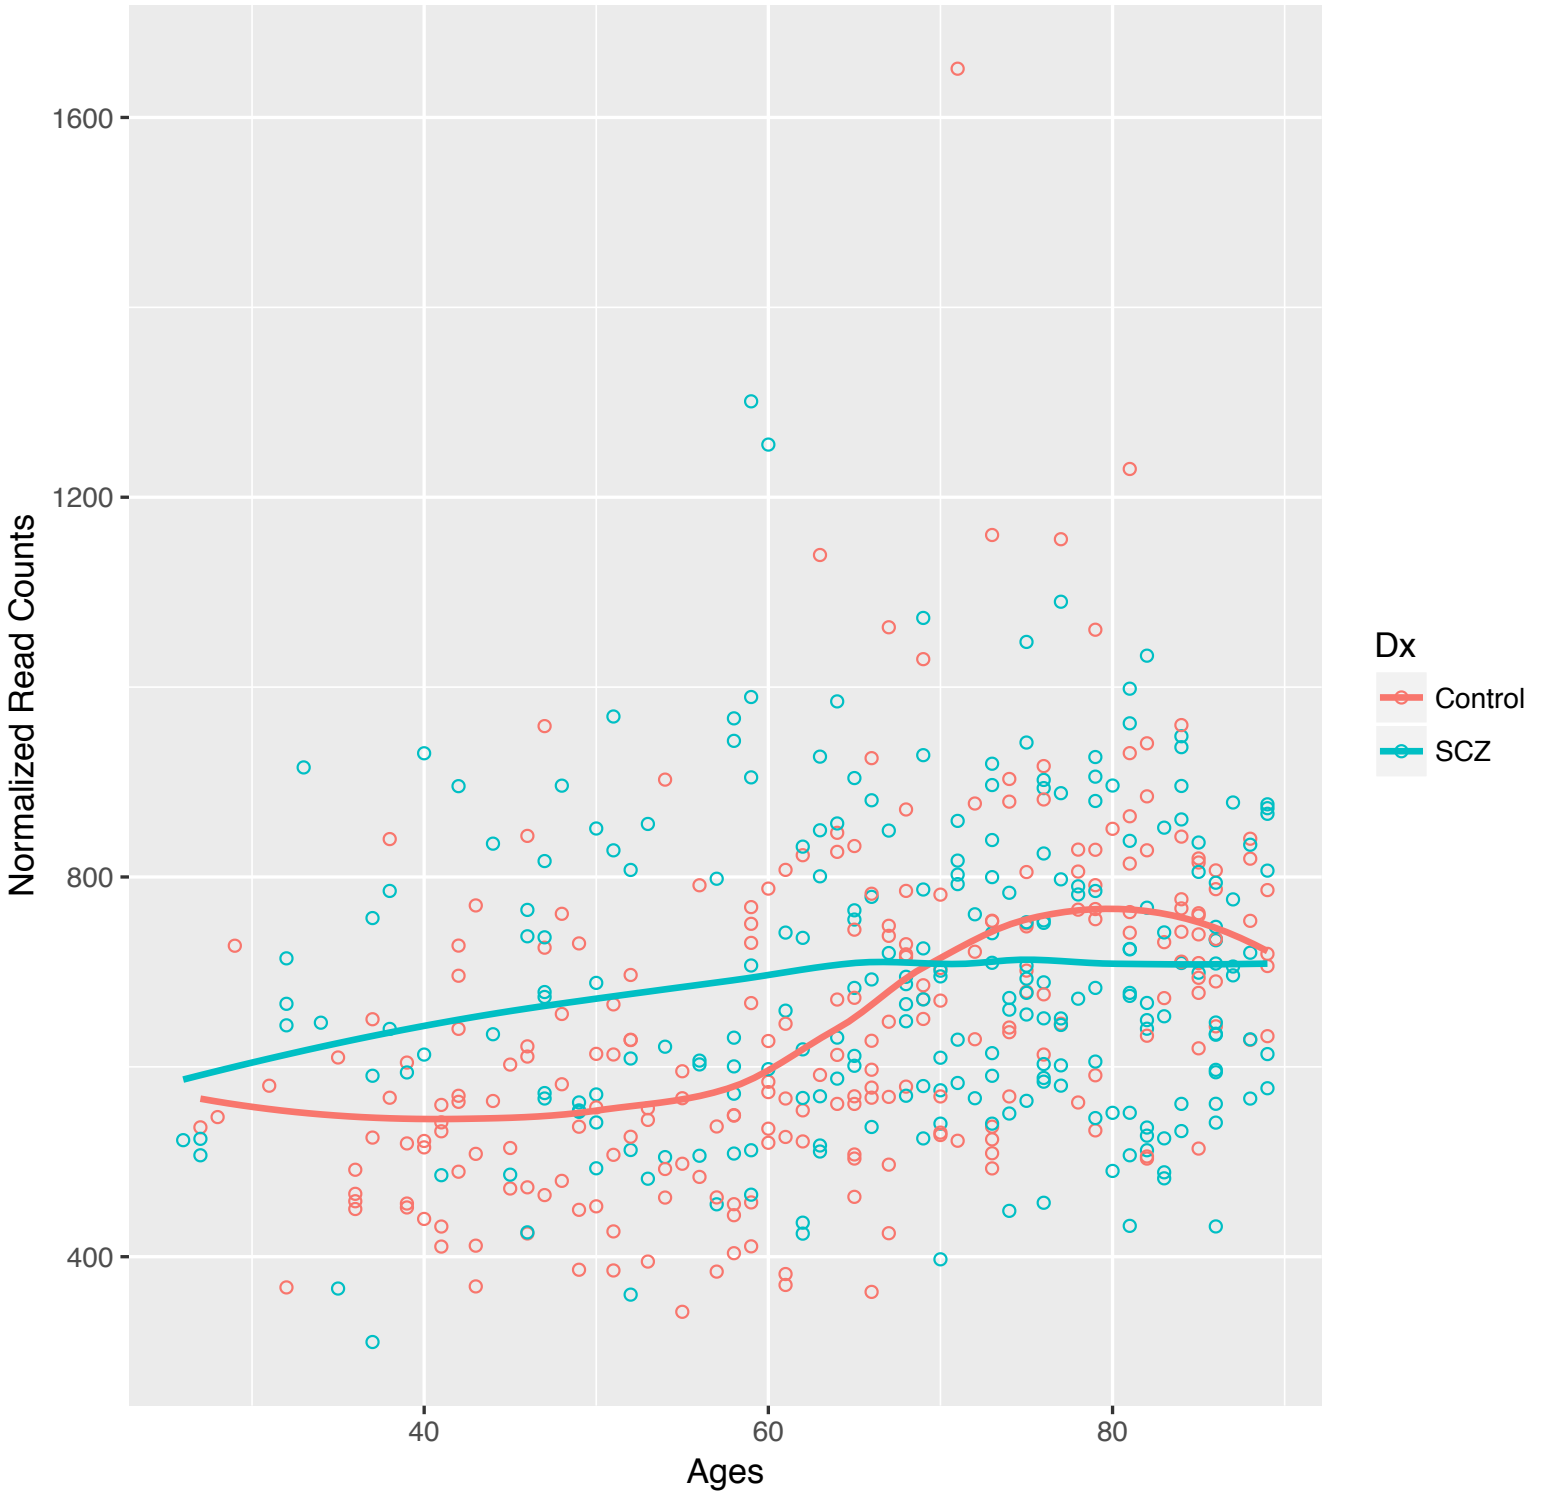

# SULT1B1

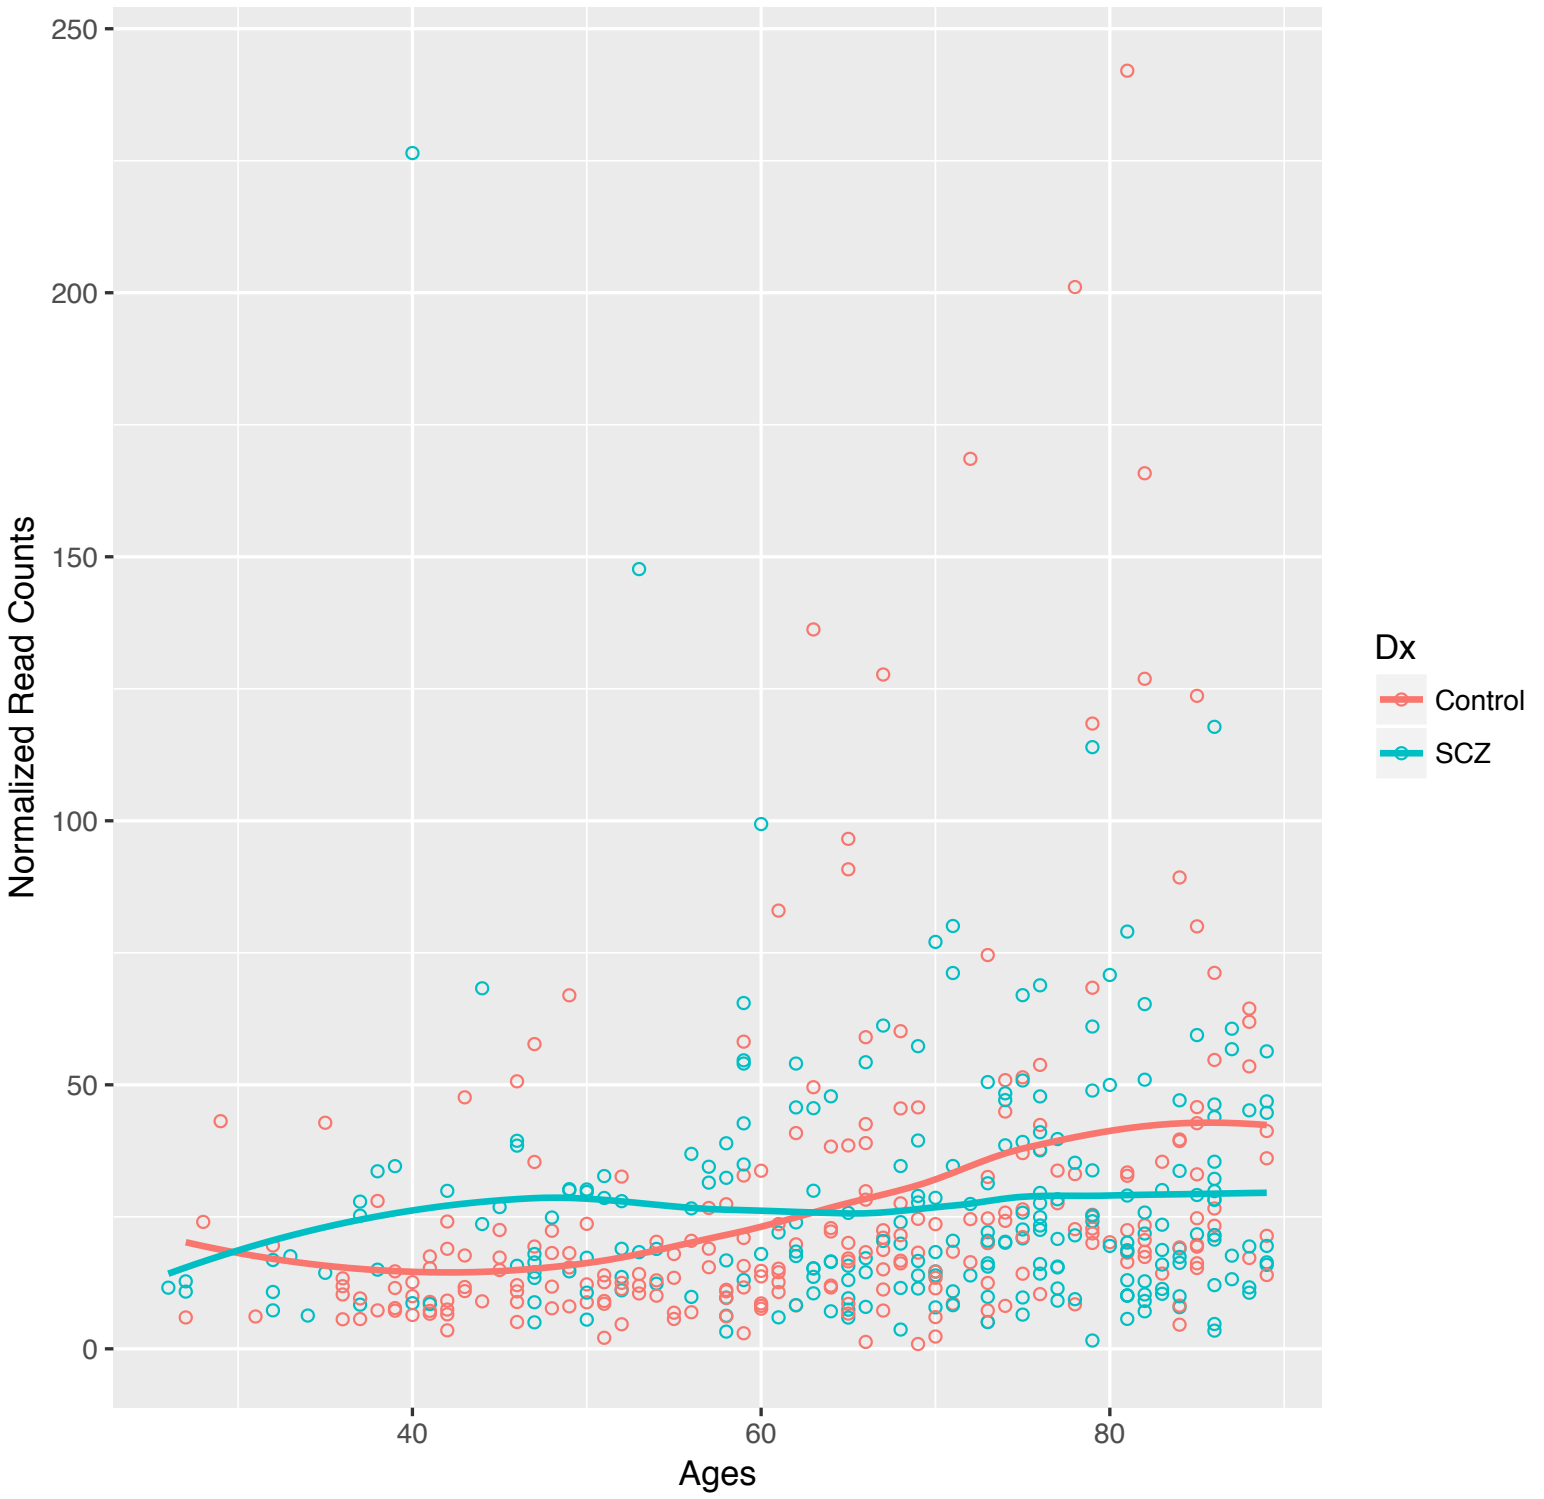

# RN7SL269P

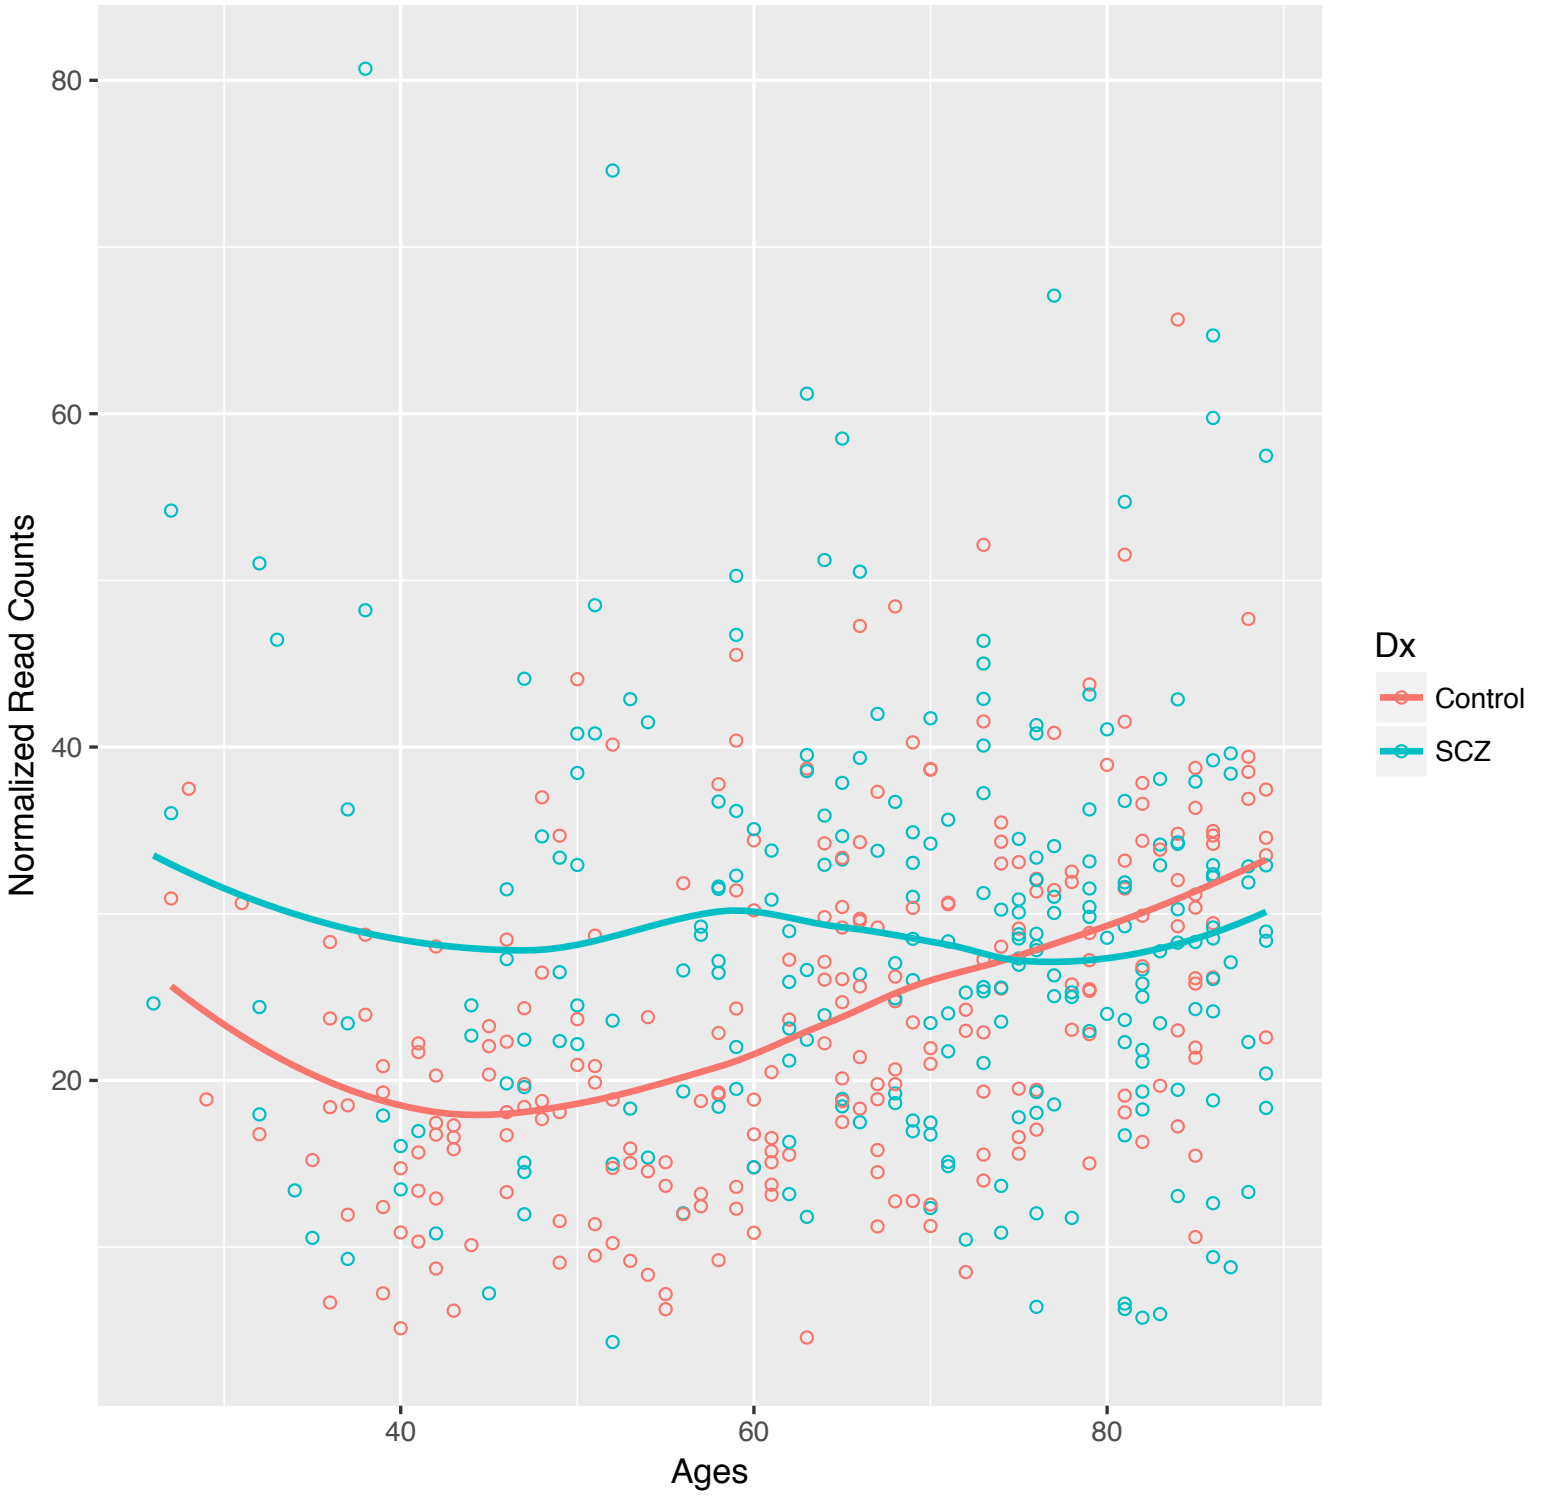



# SERGEF

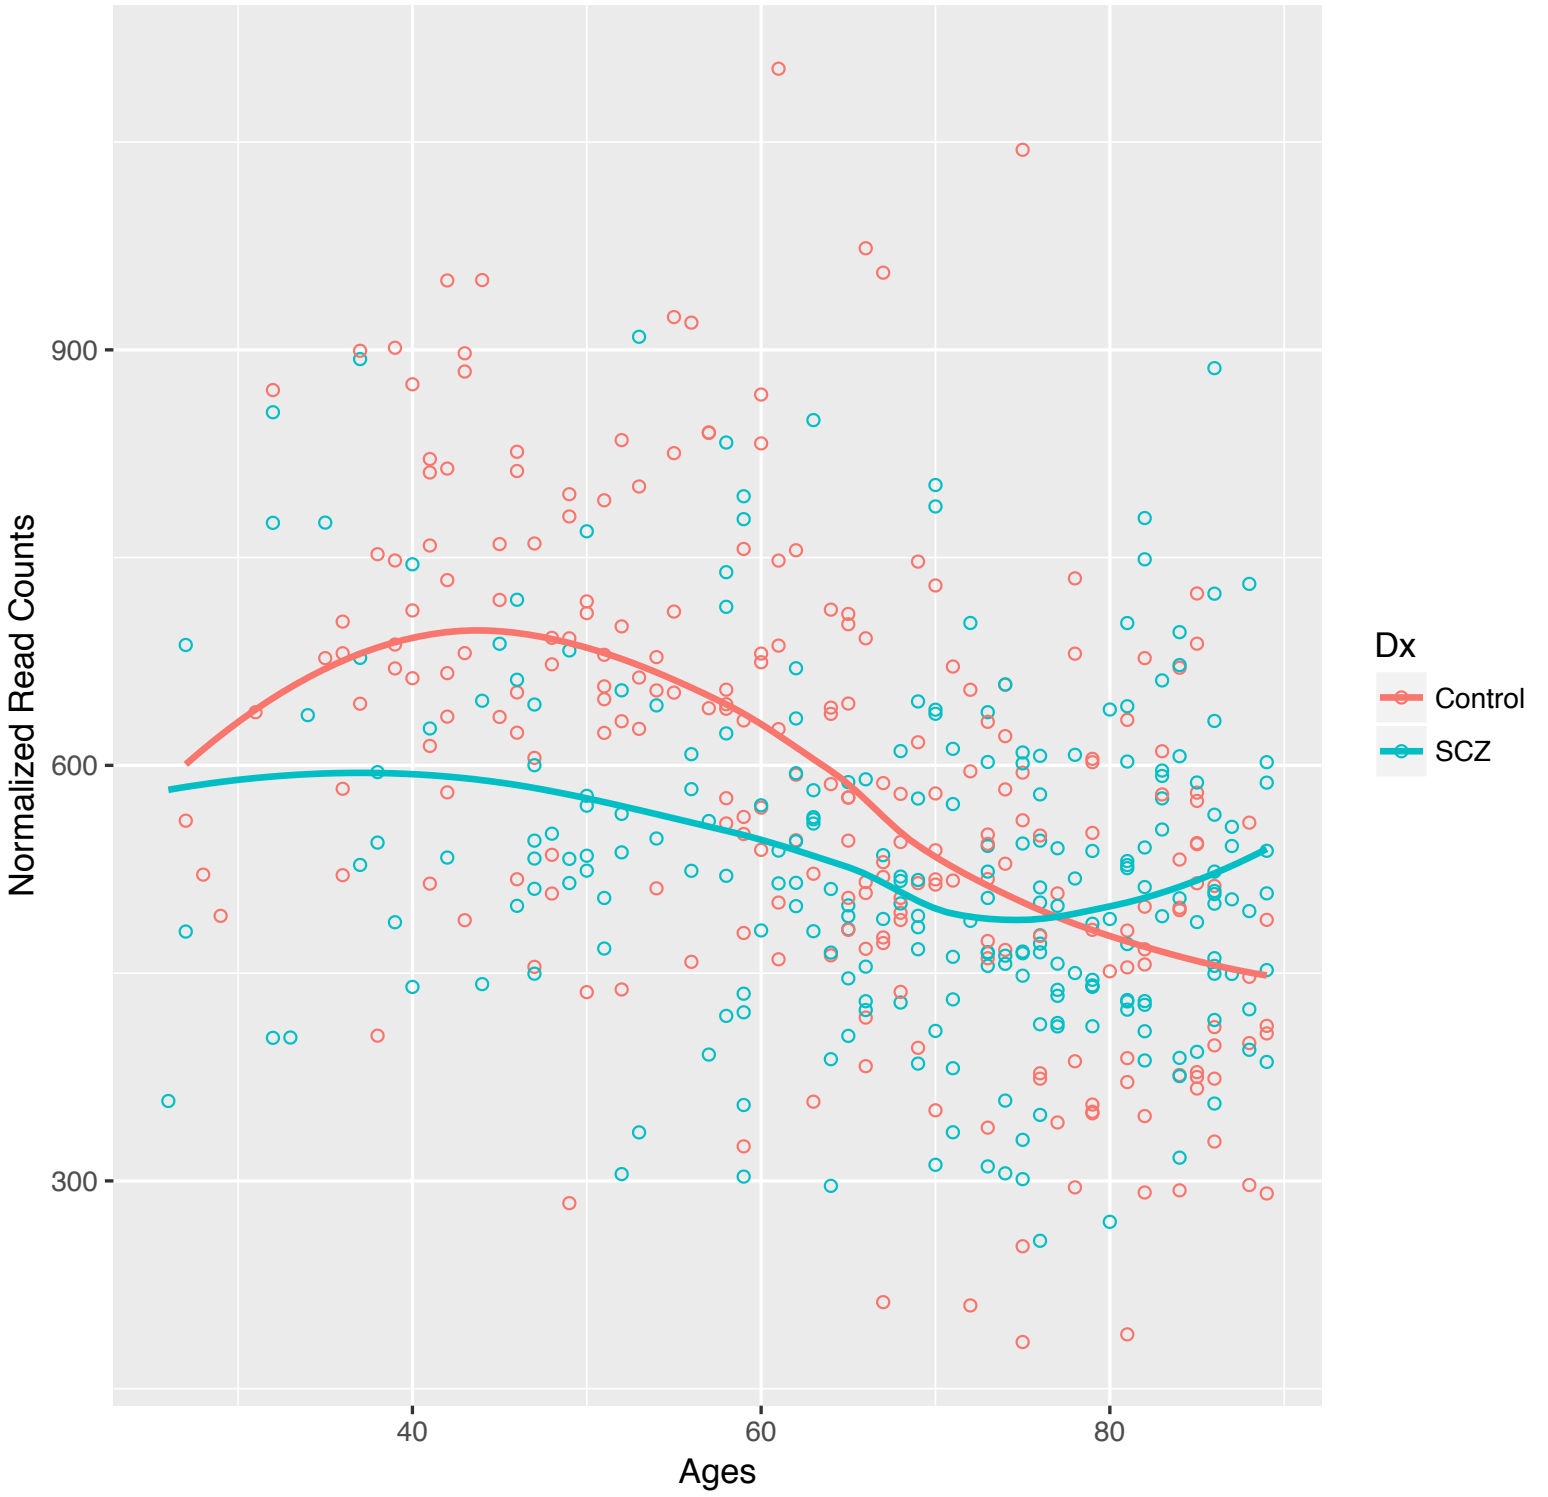

# GALNT16

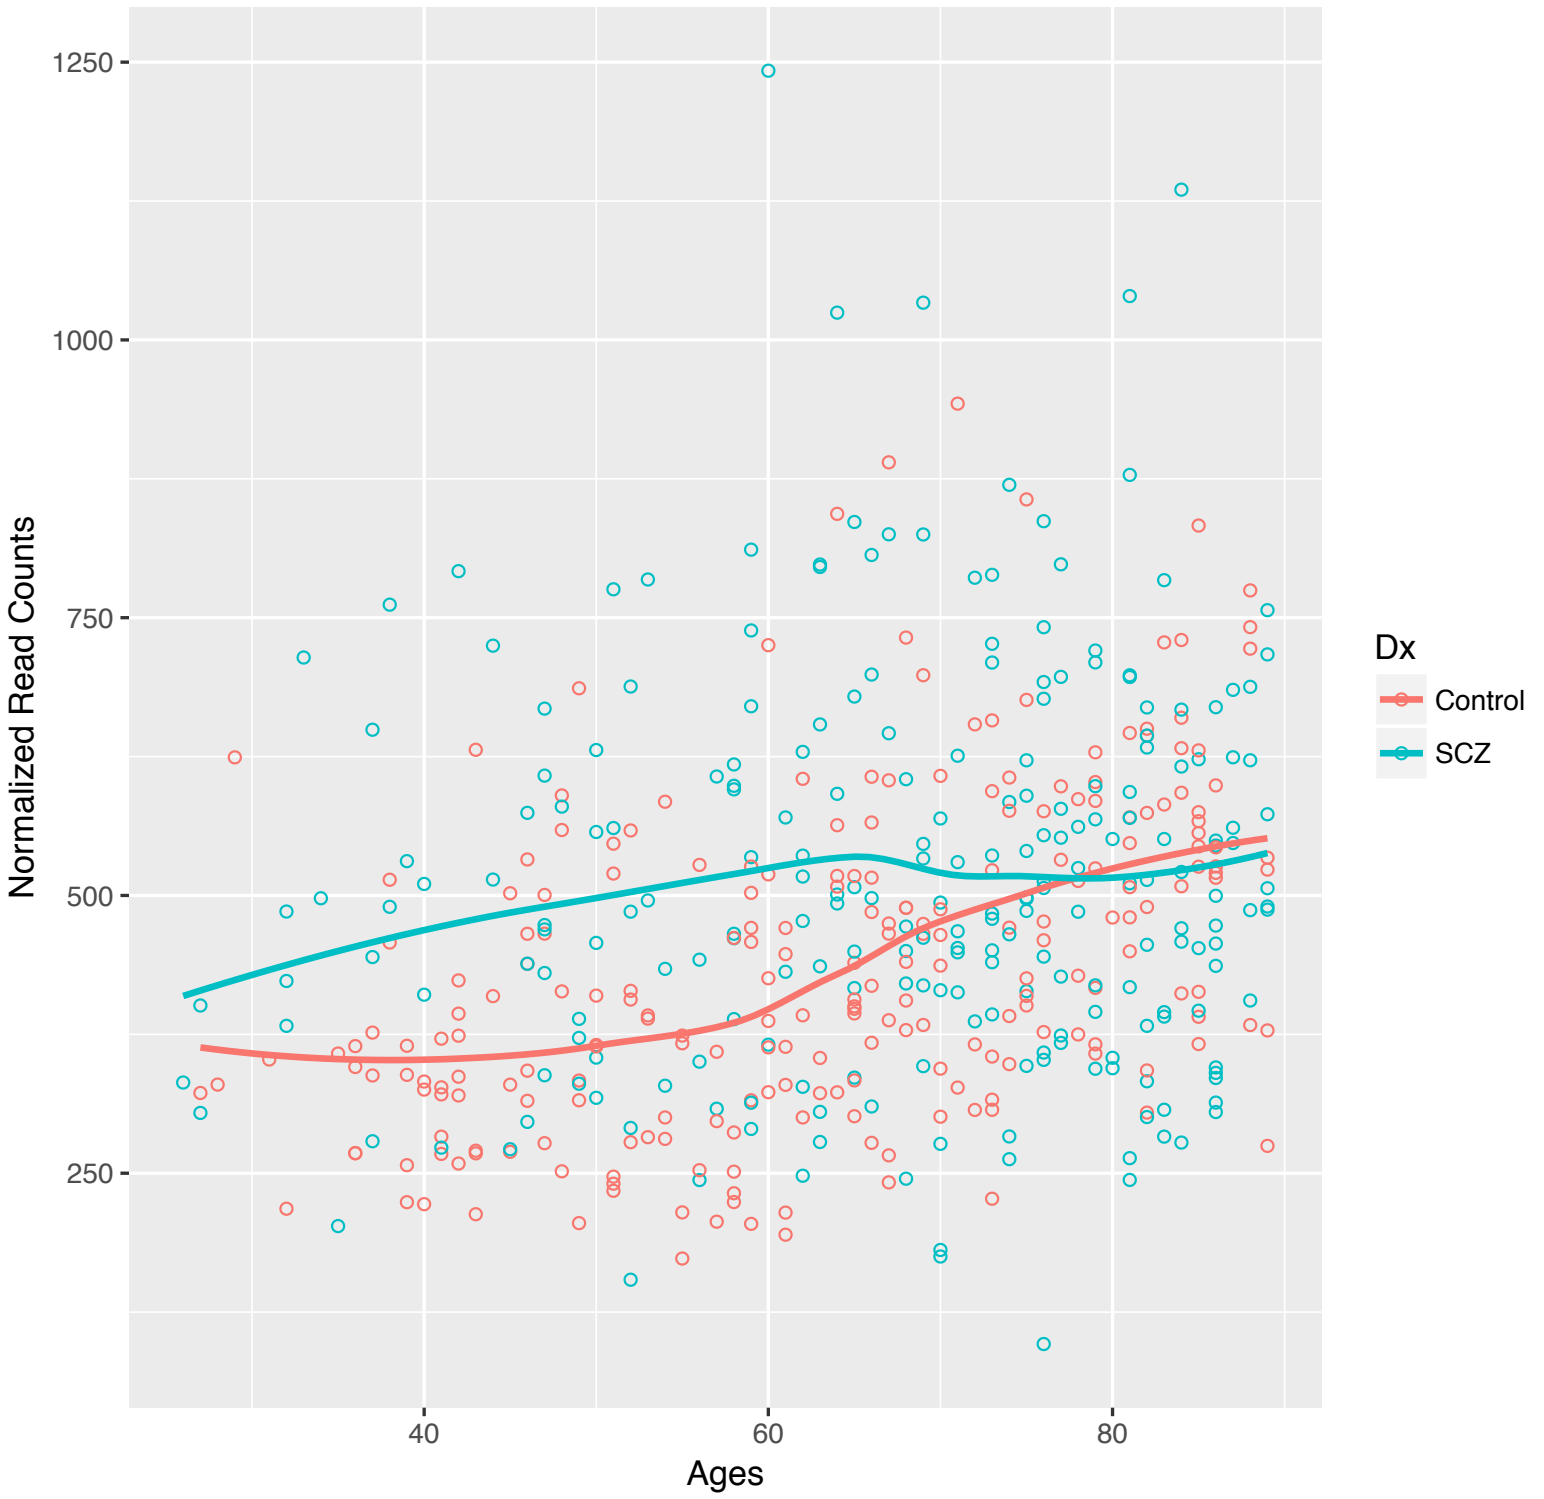

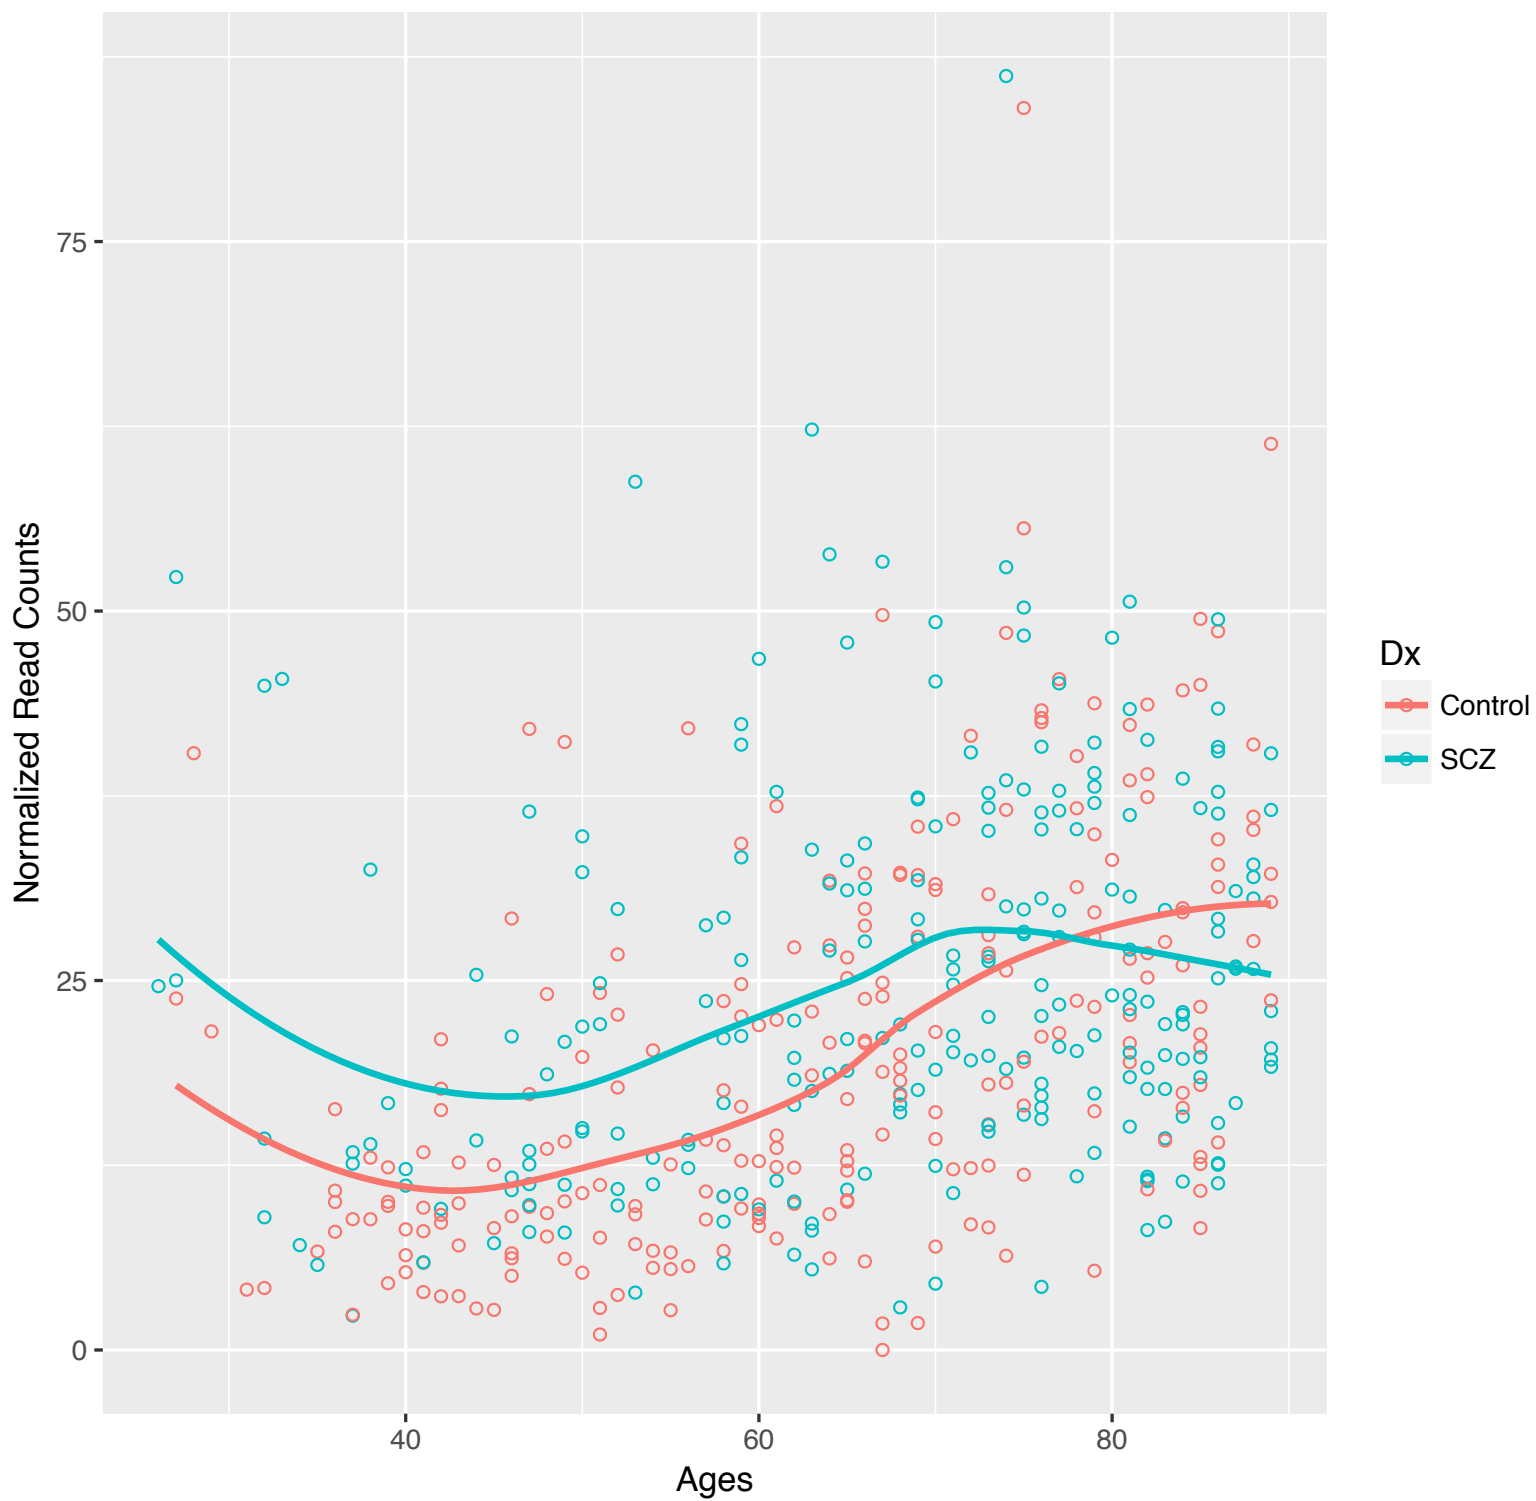

# PLGLA

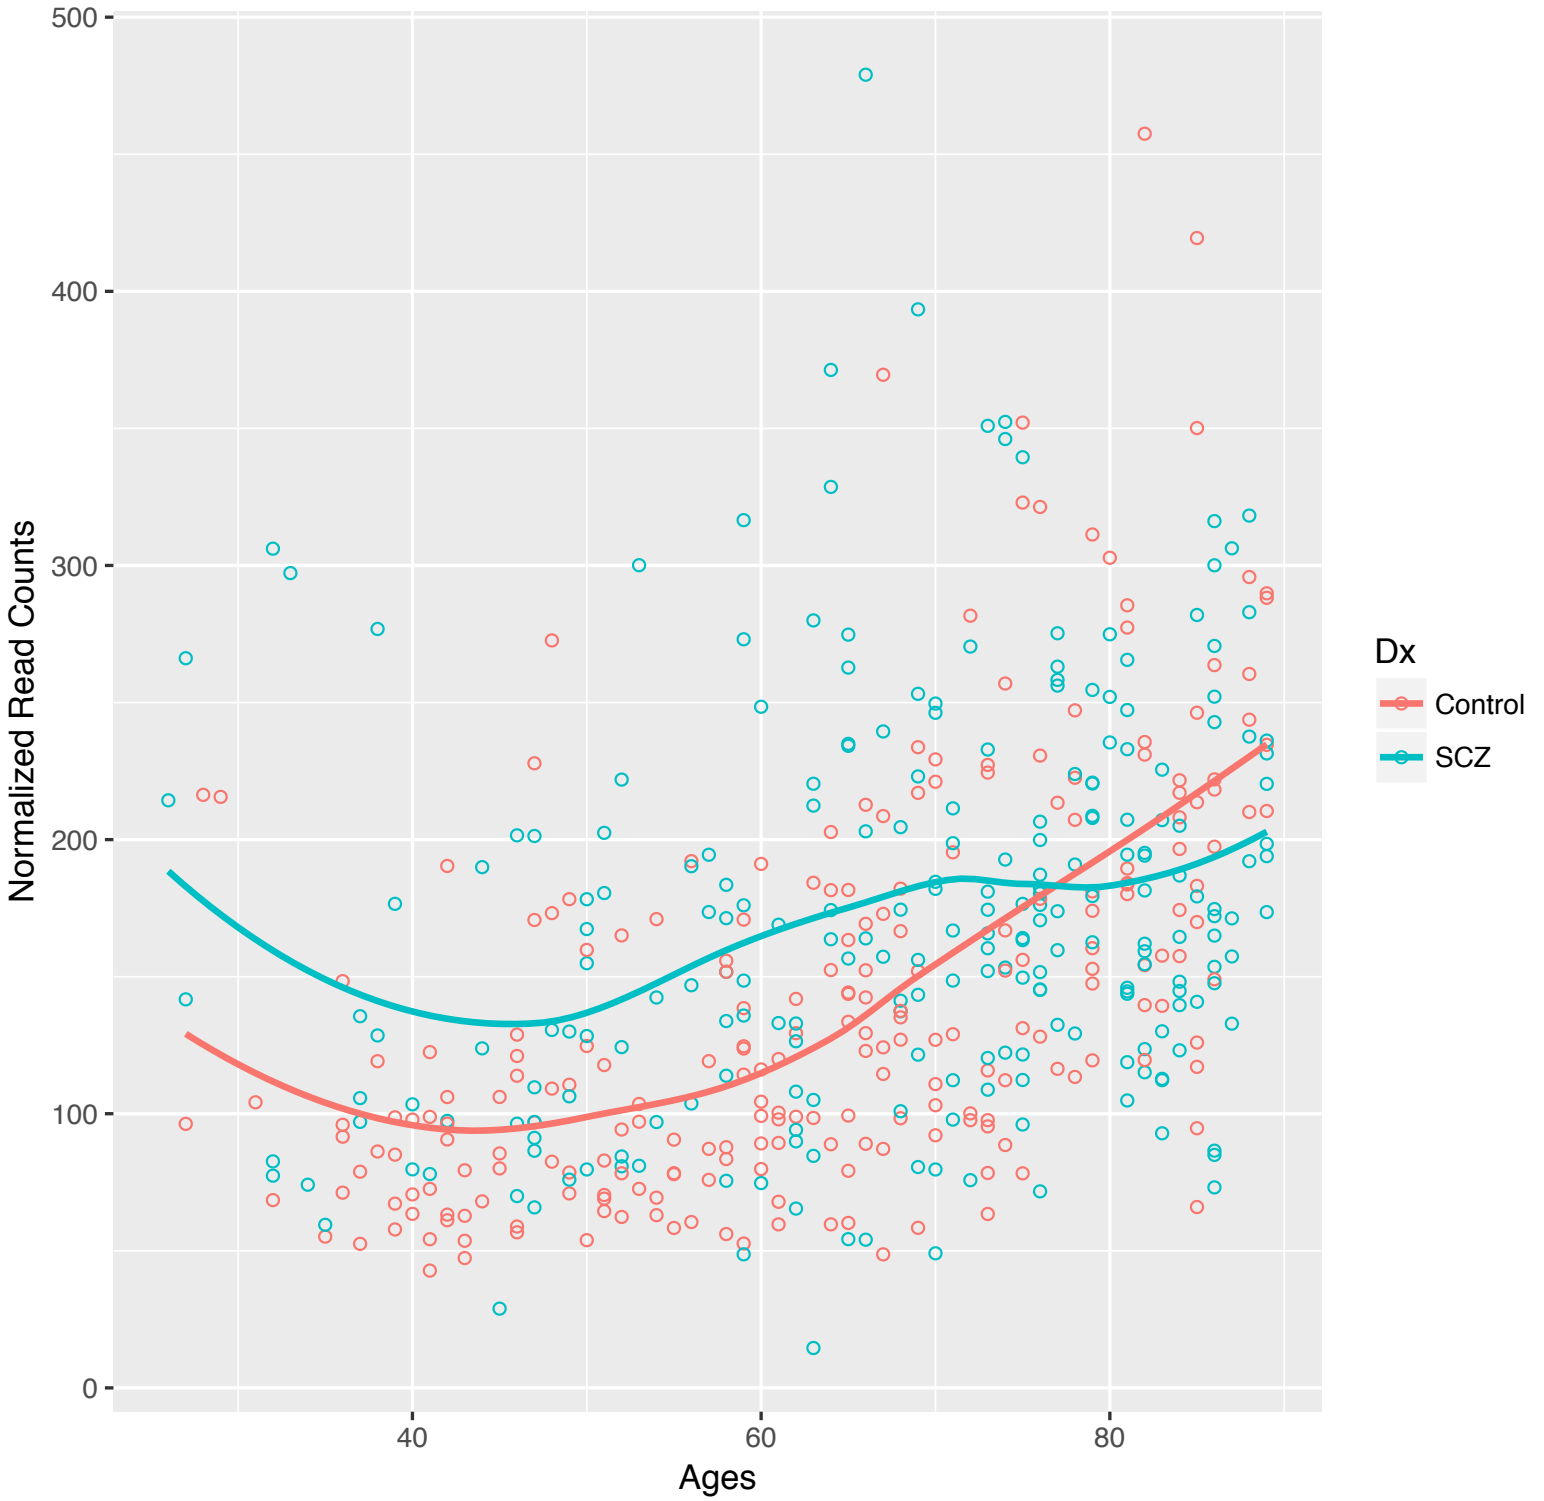

# VPS45

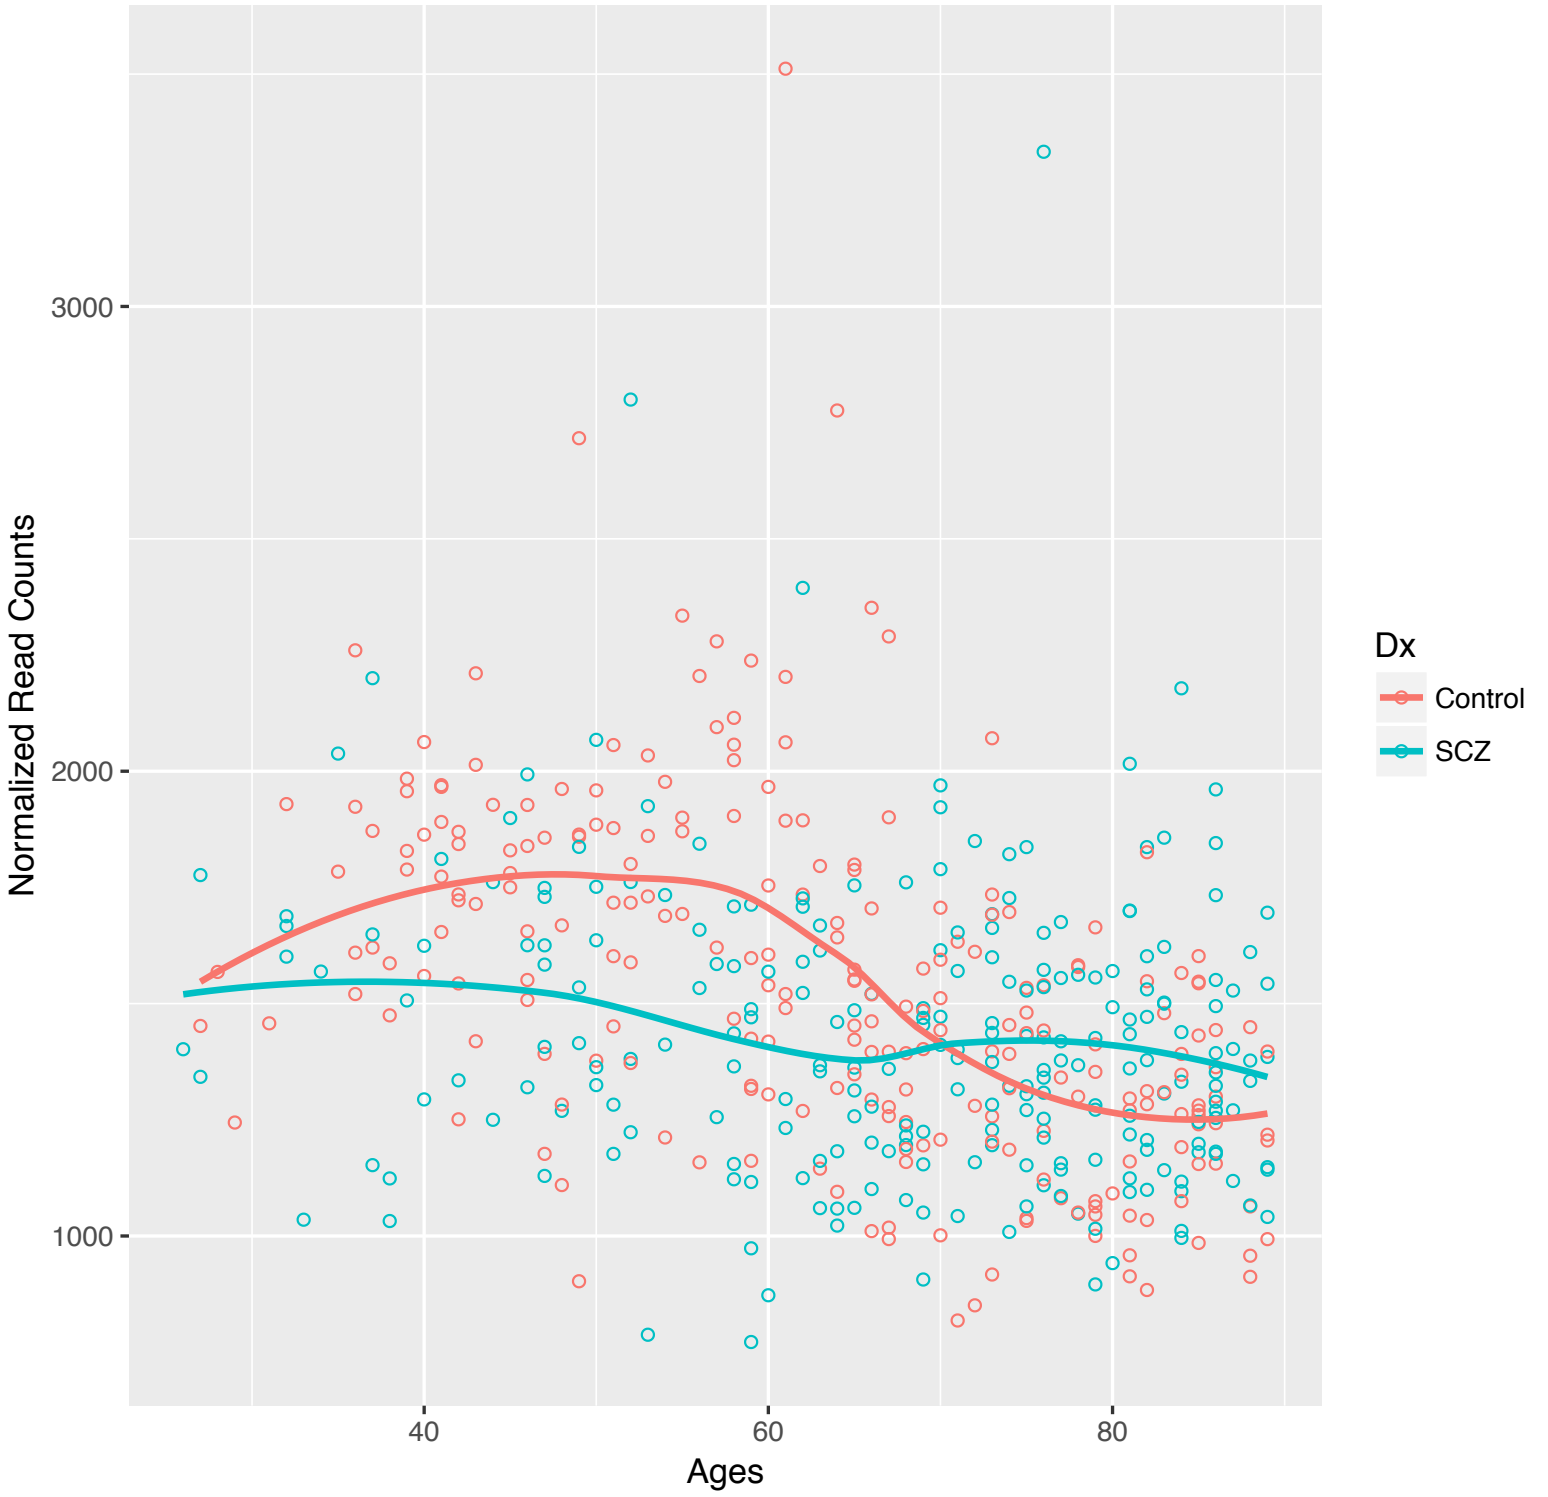

# AQP6

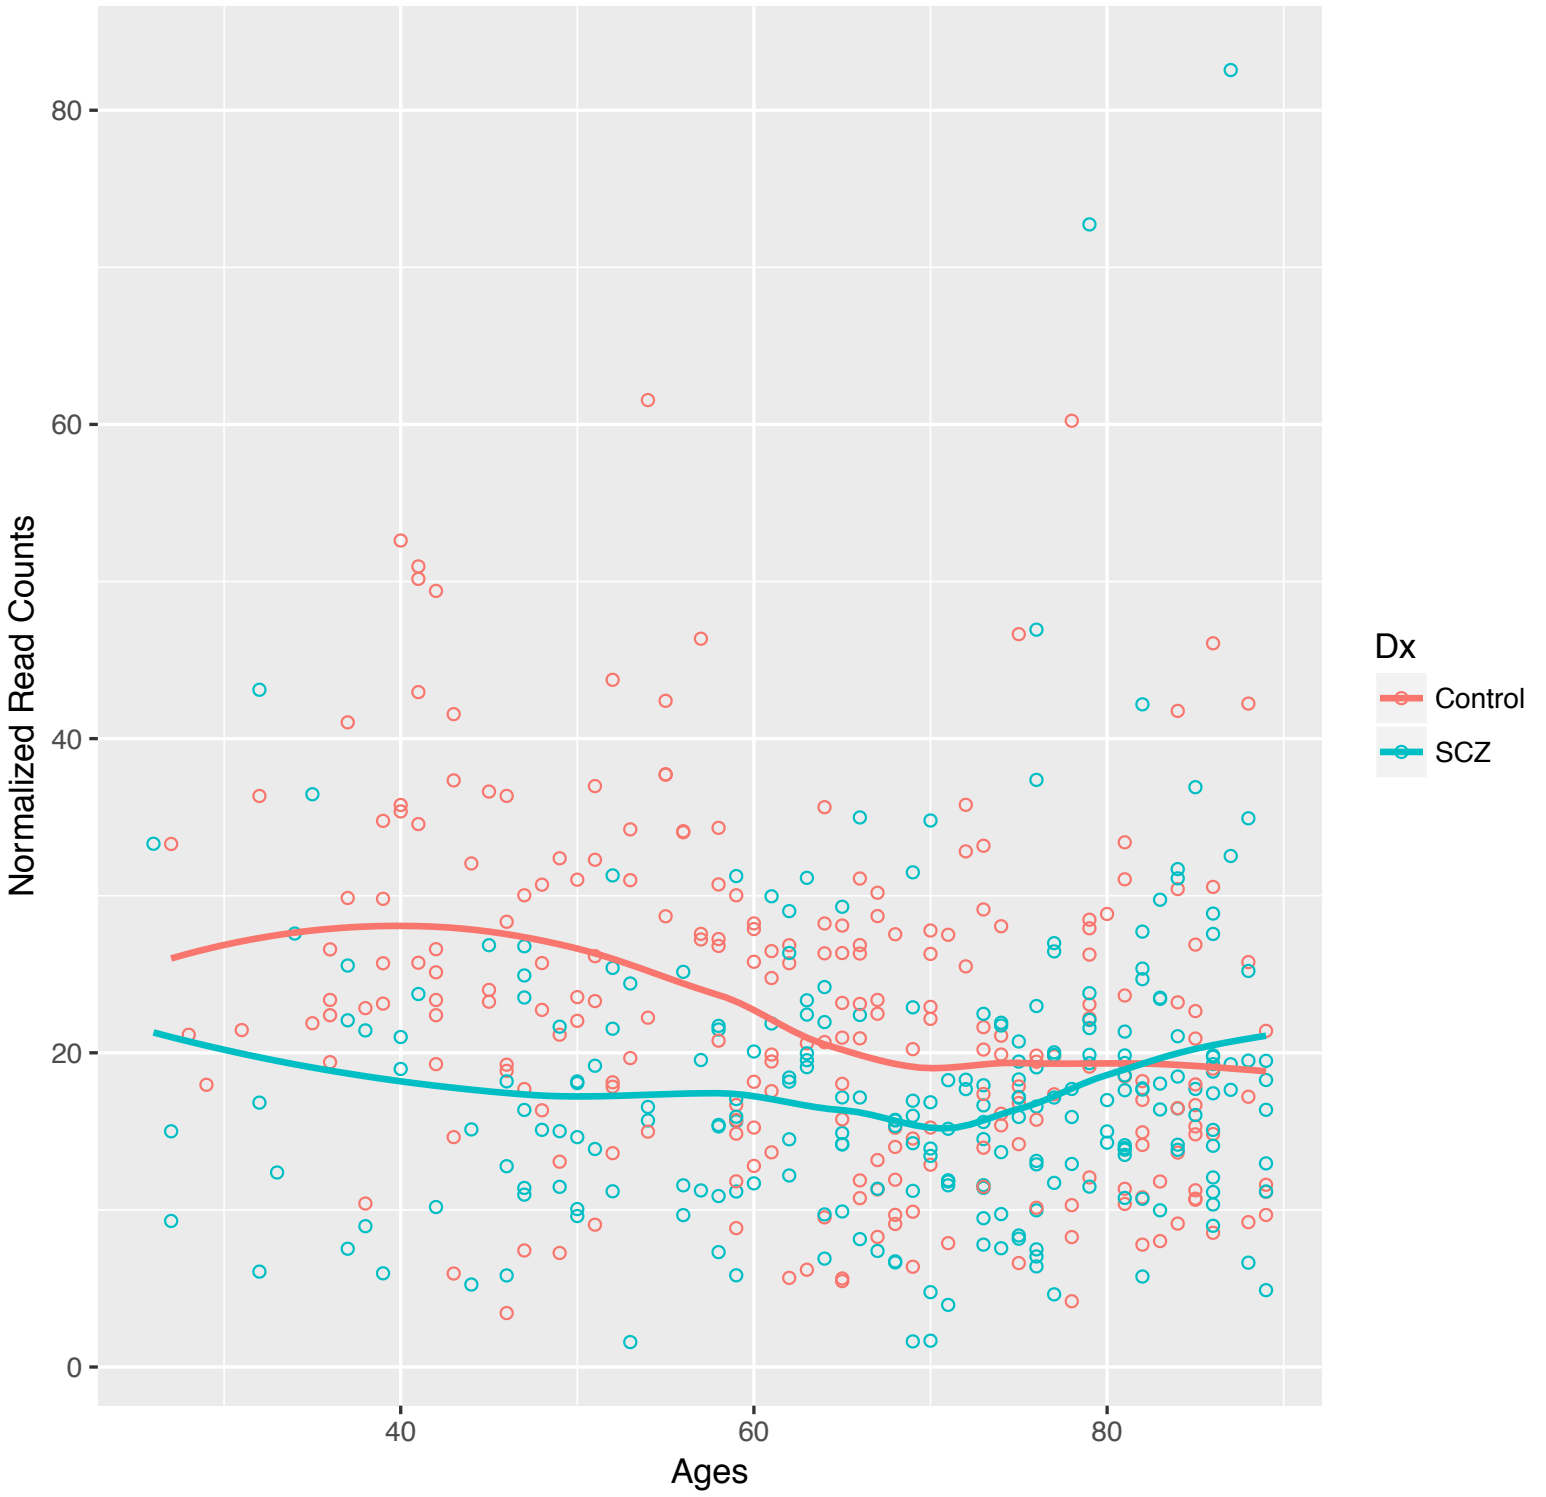

# ICMT

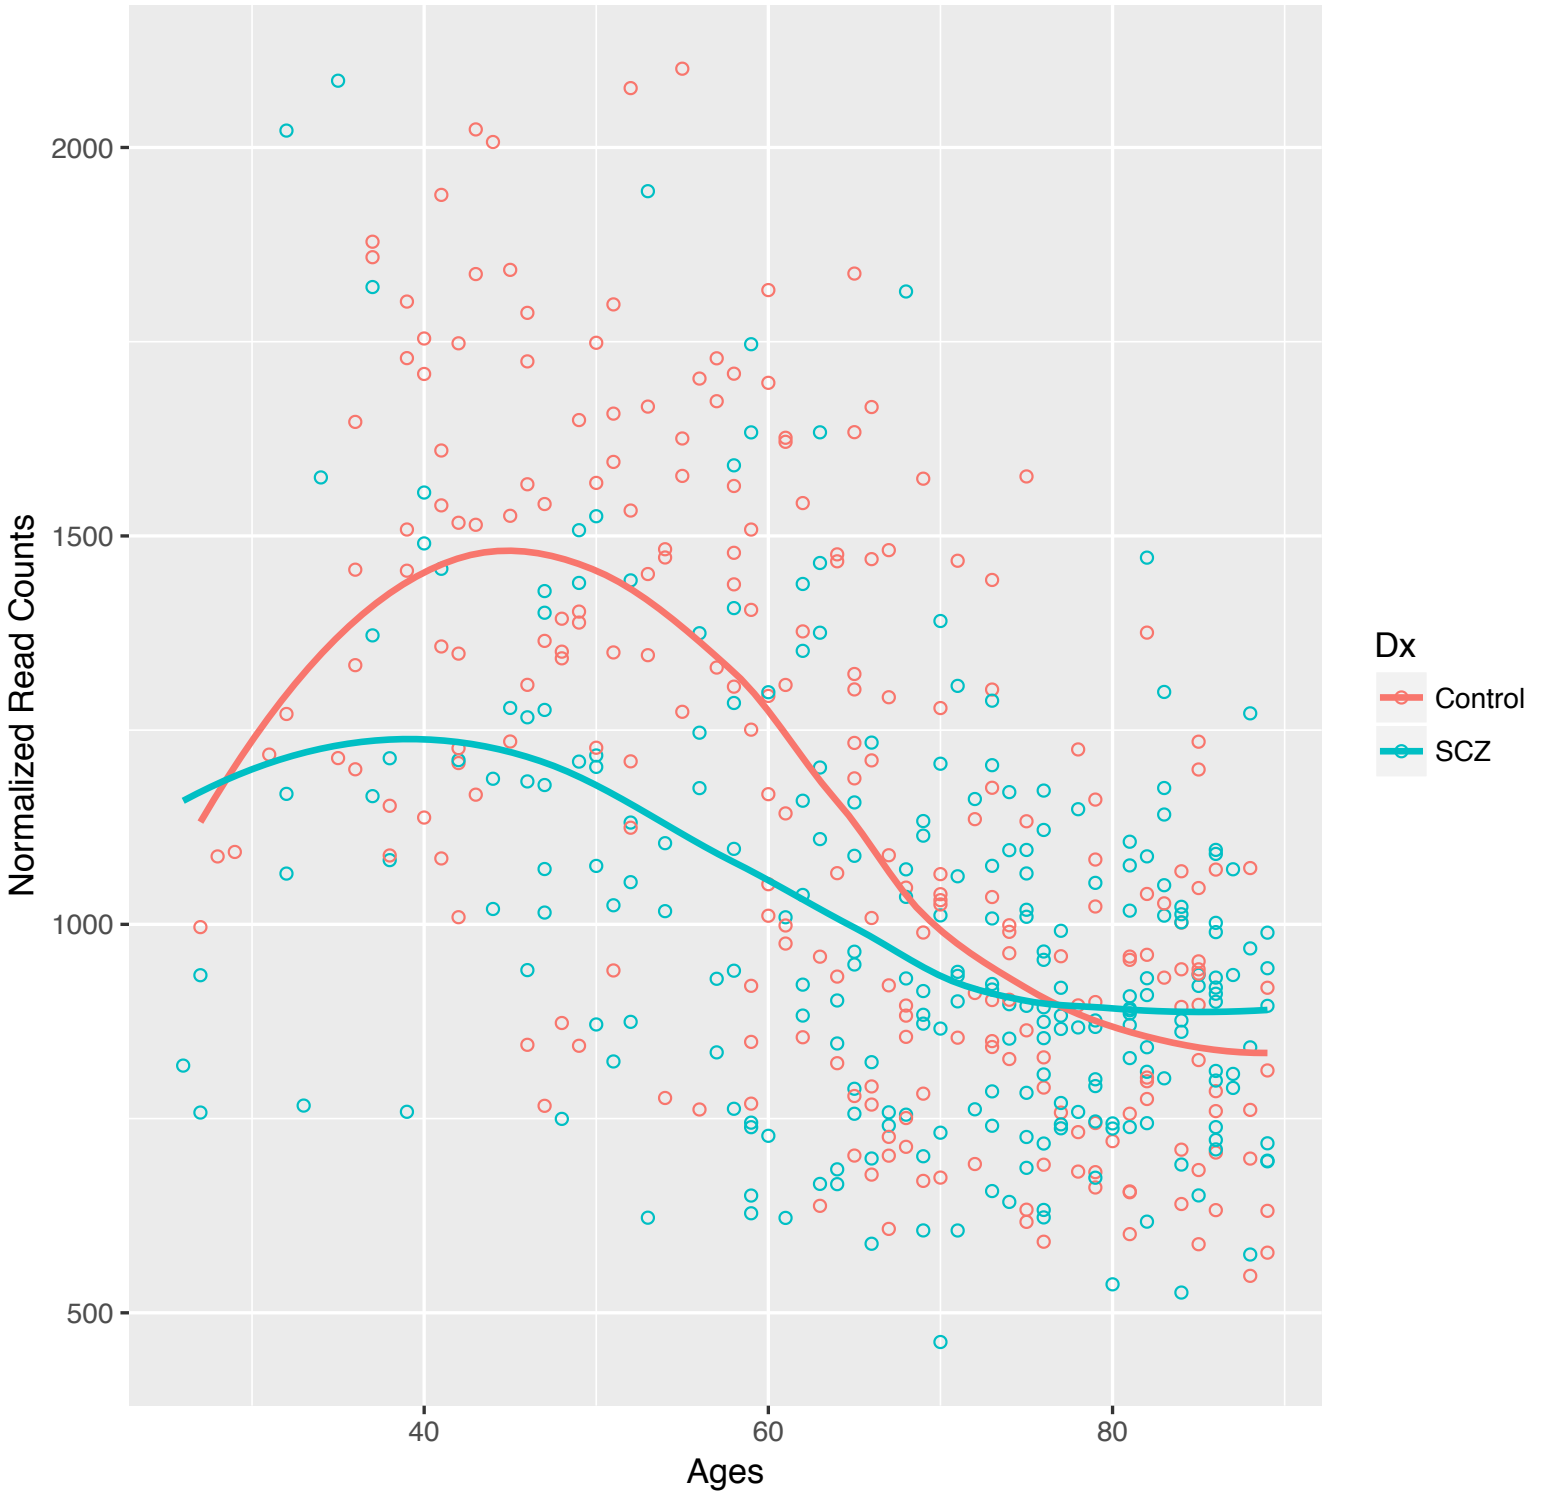

# FGF17

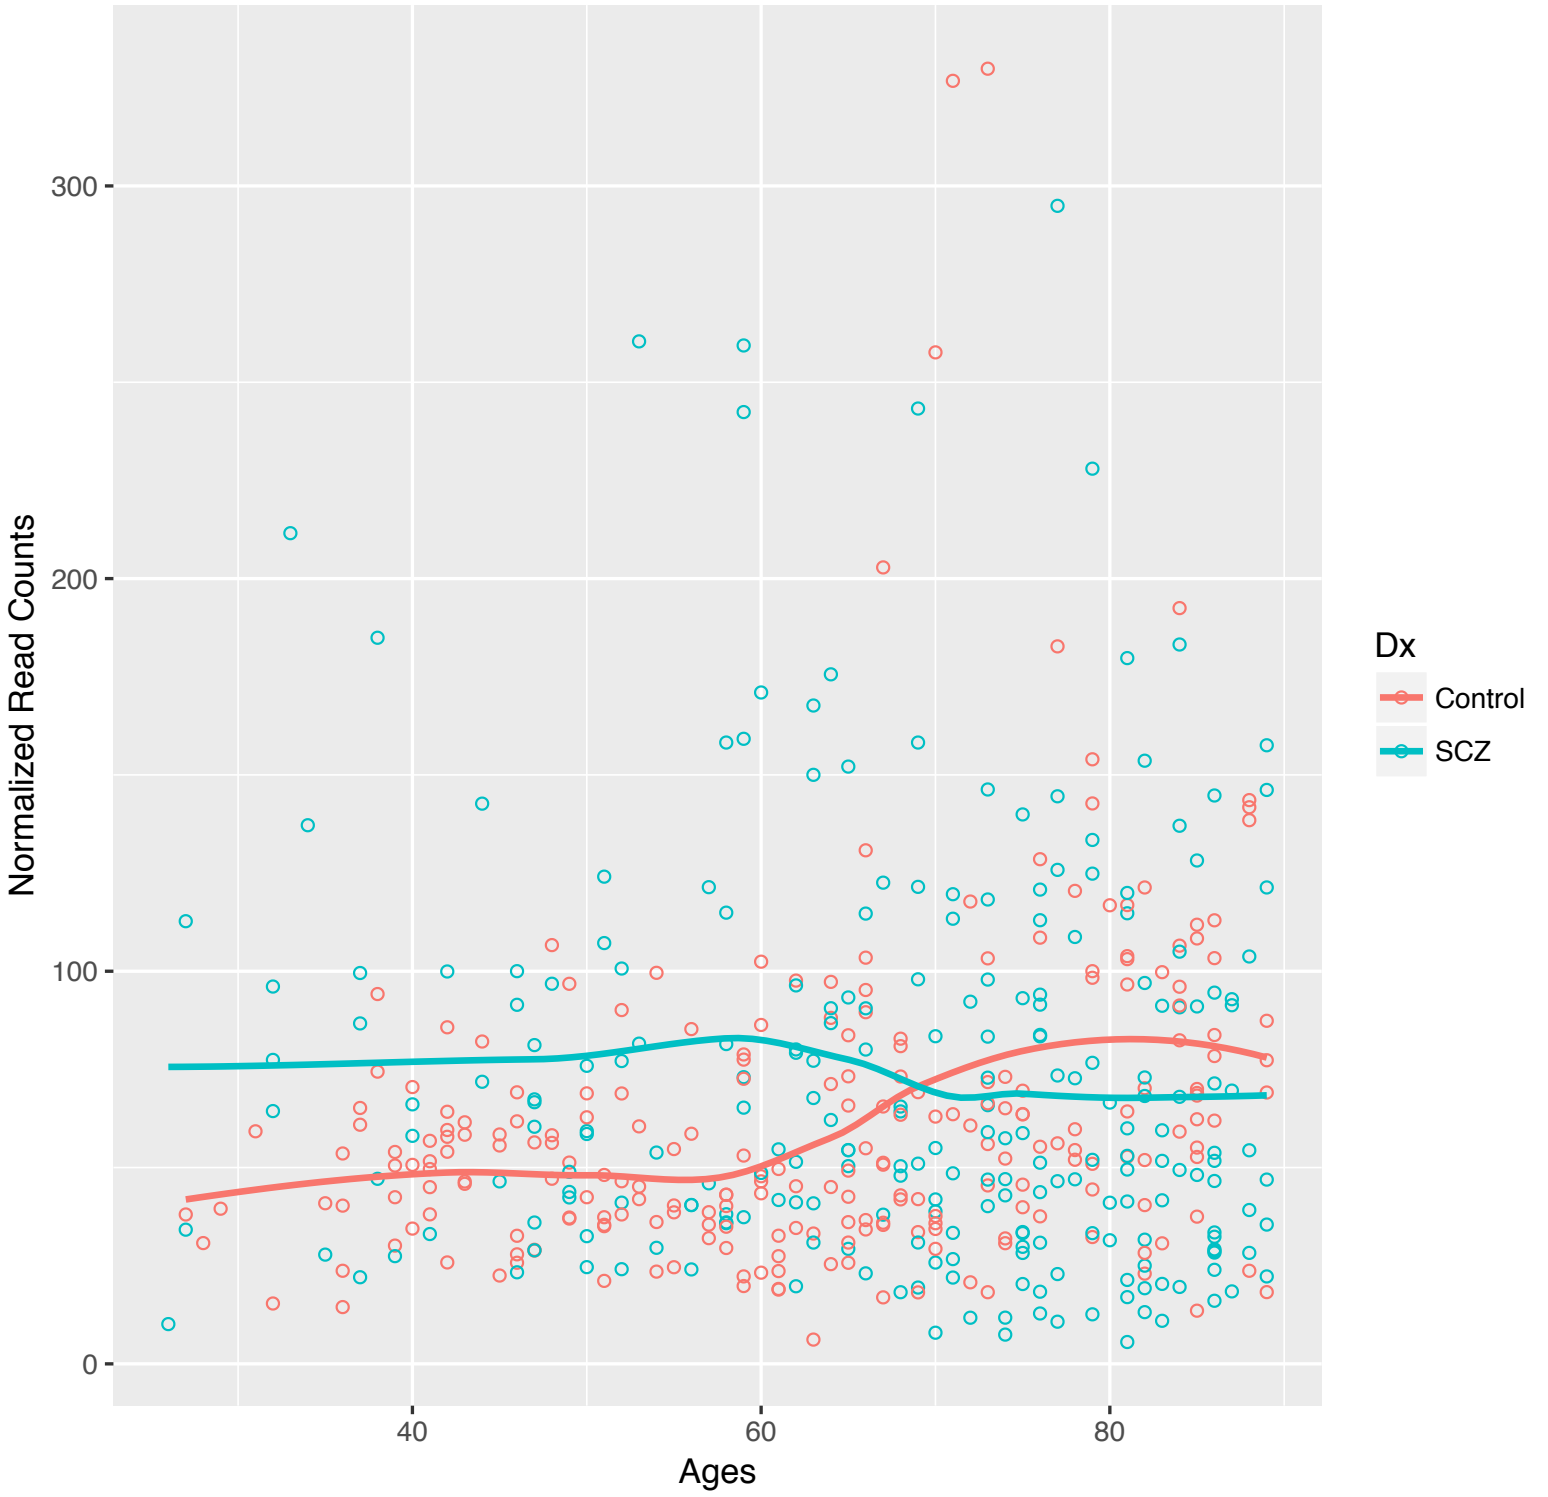



# PDHB

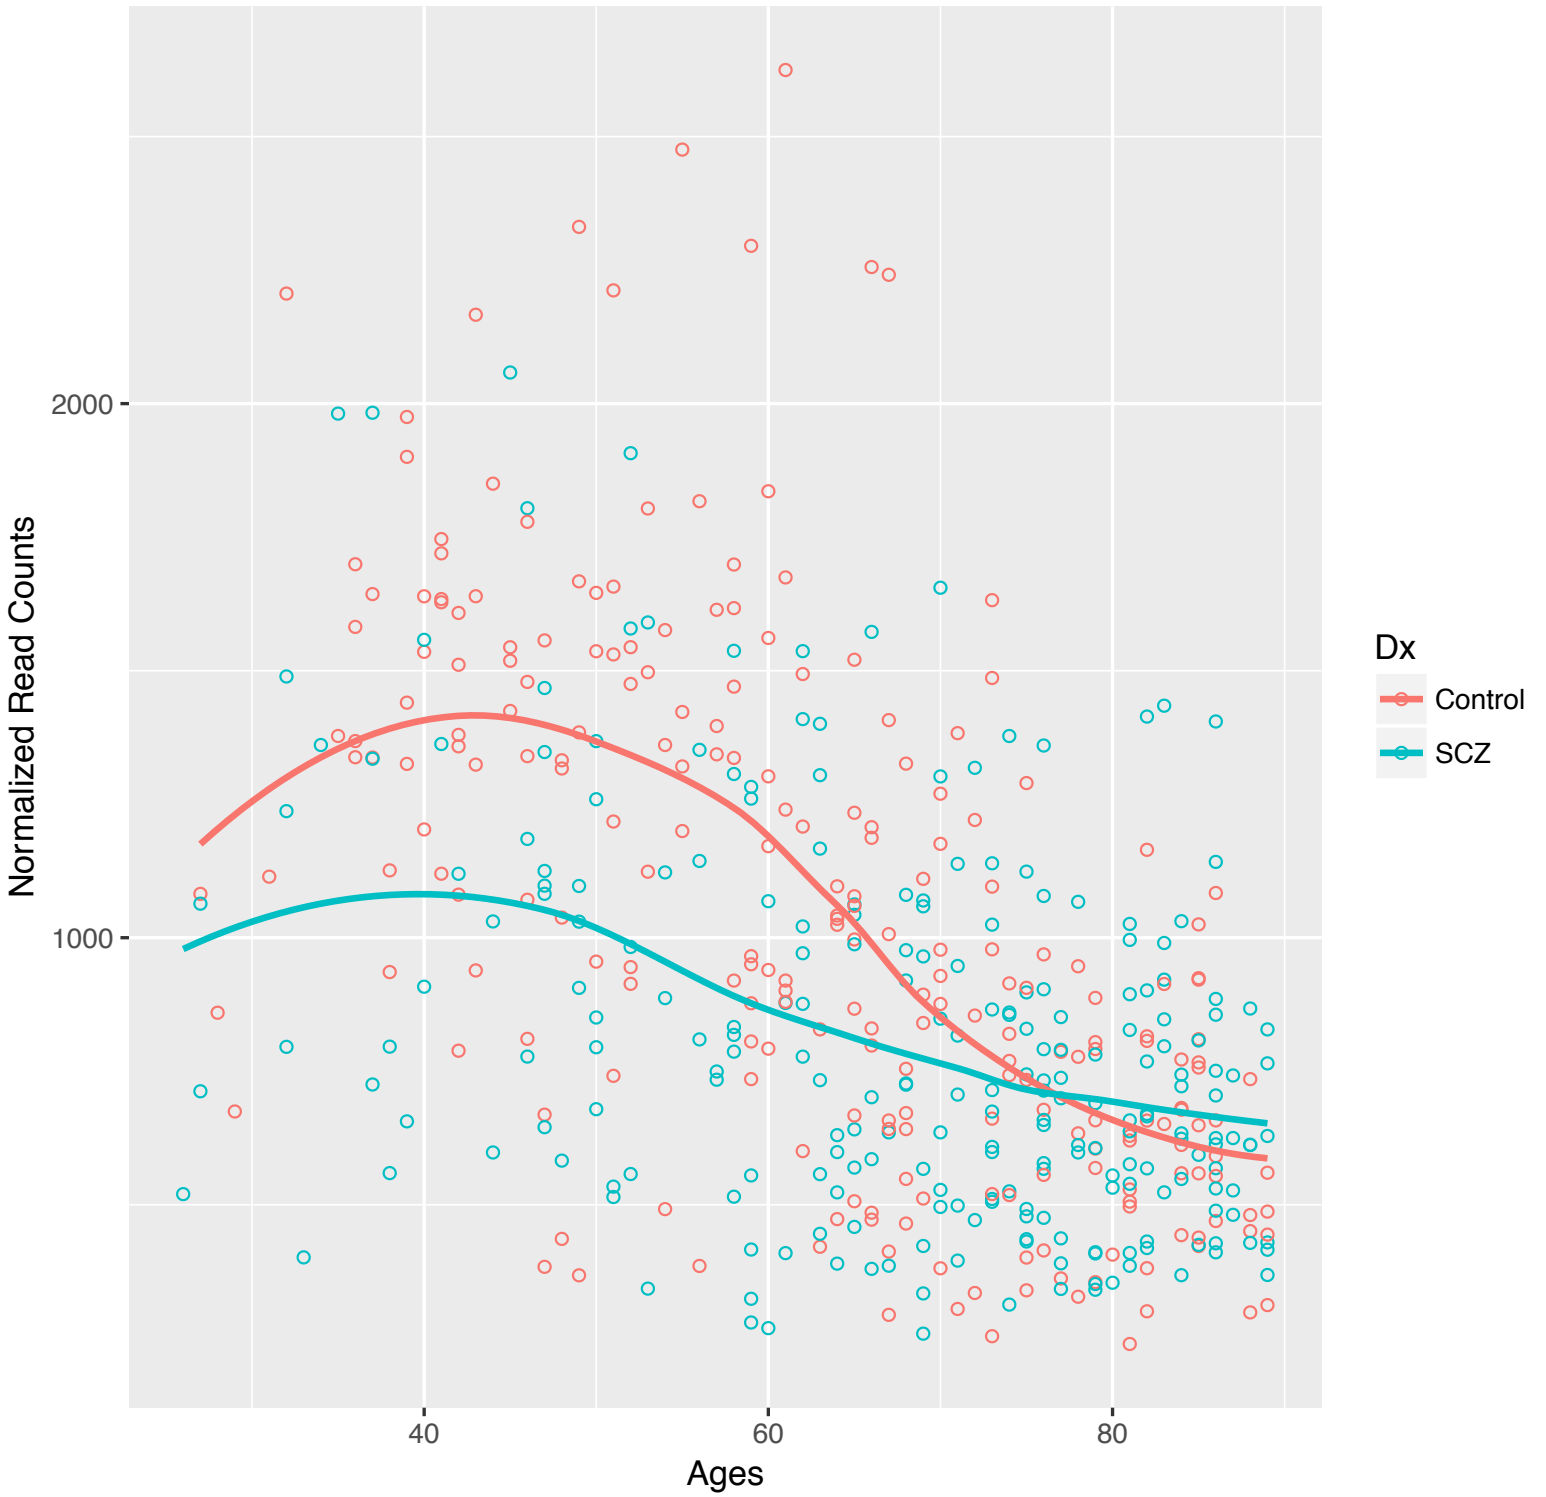

# B3GLCT

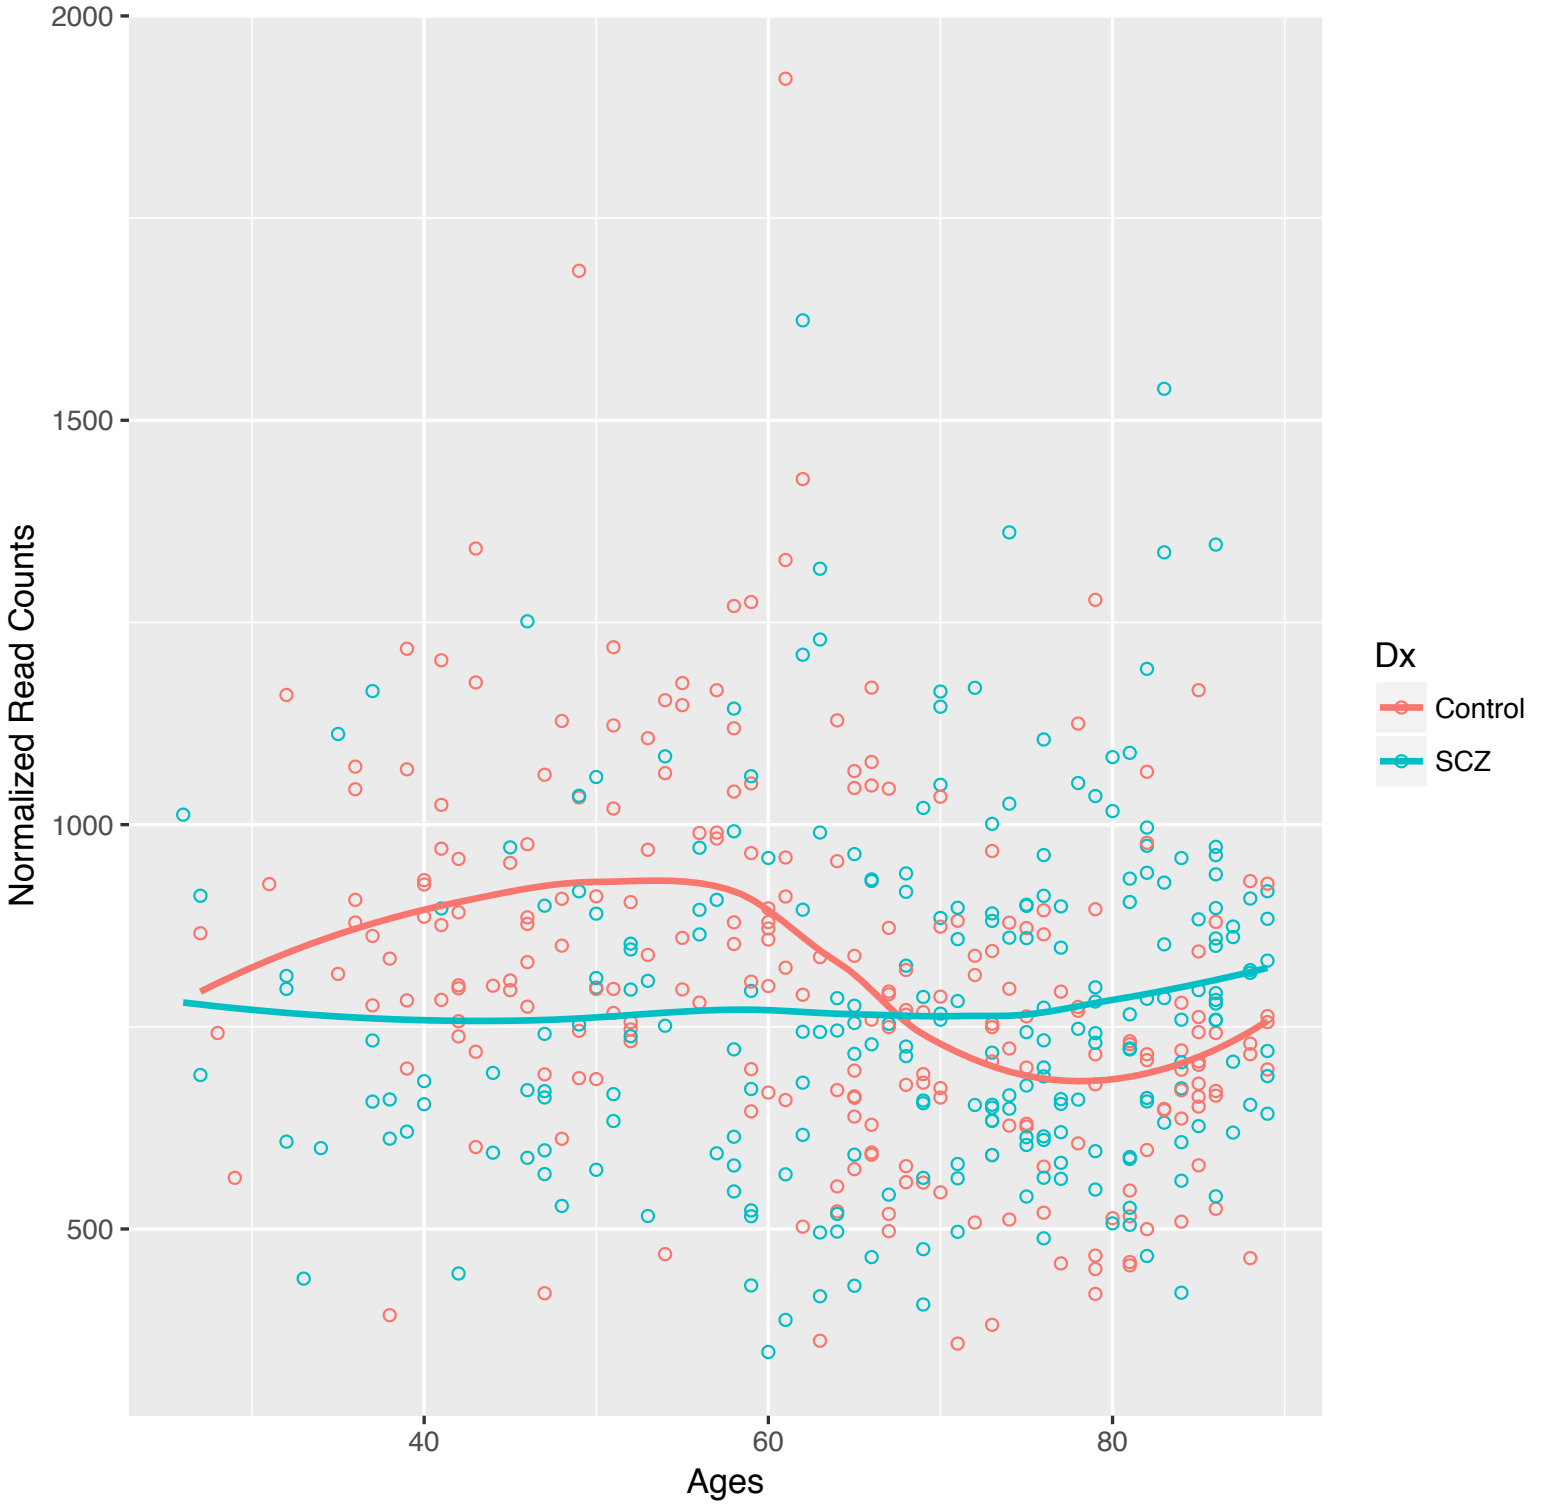

# MGAT3-AS1

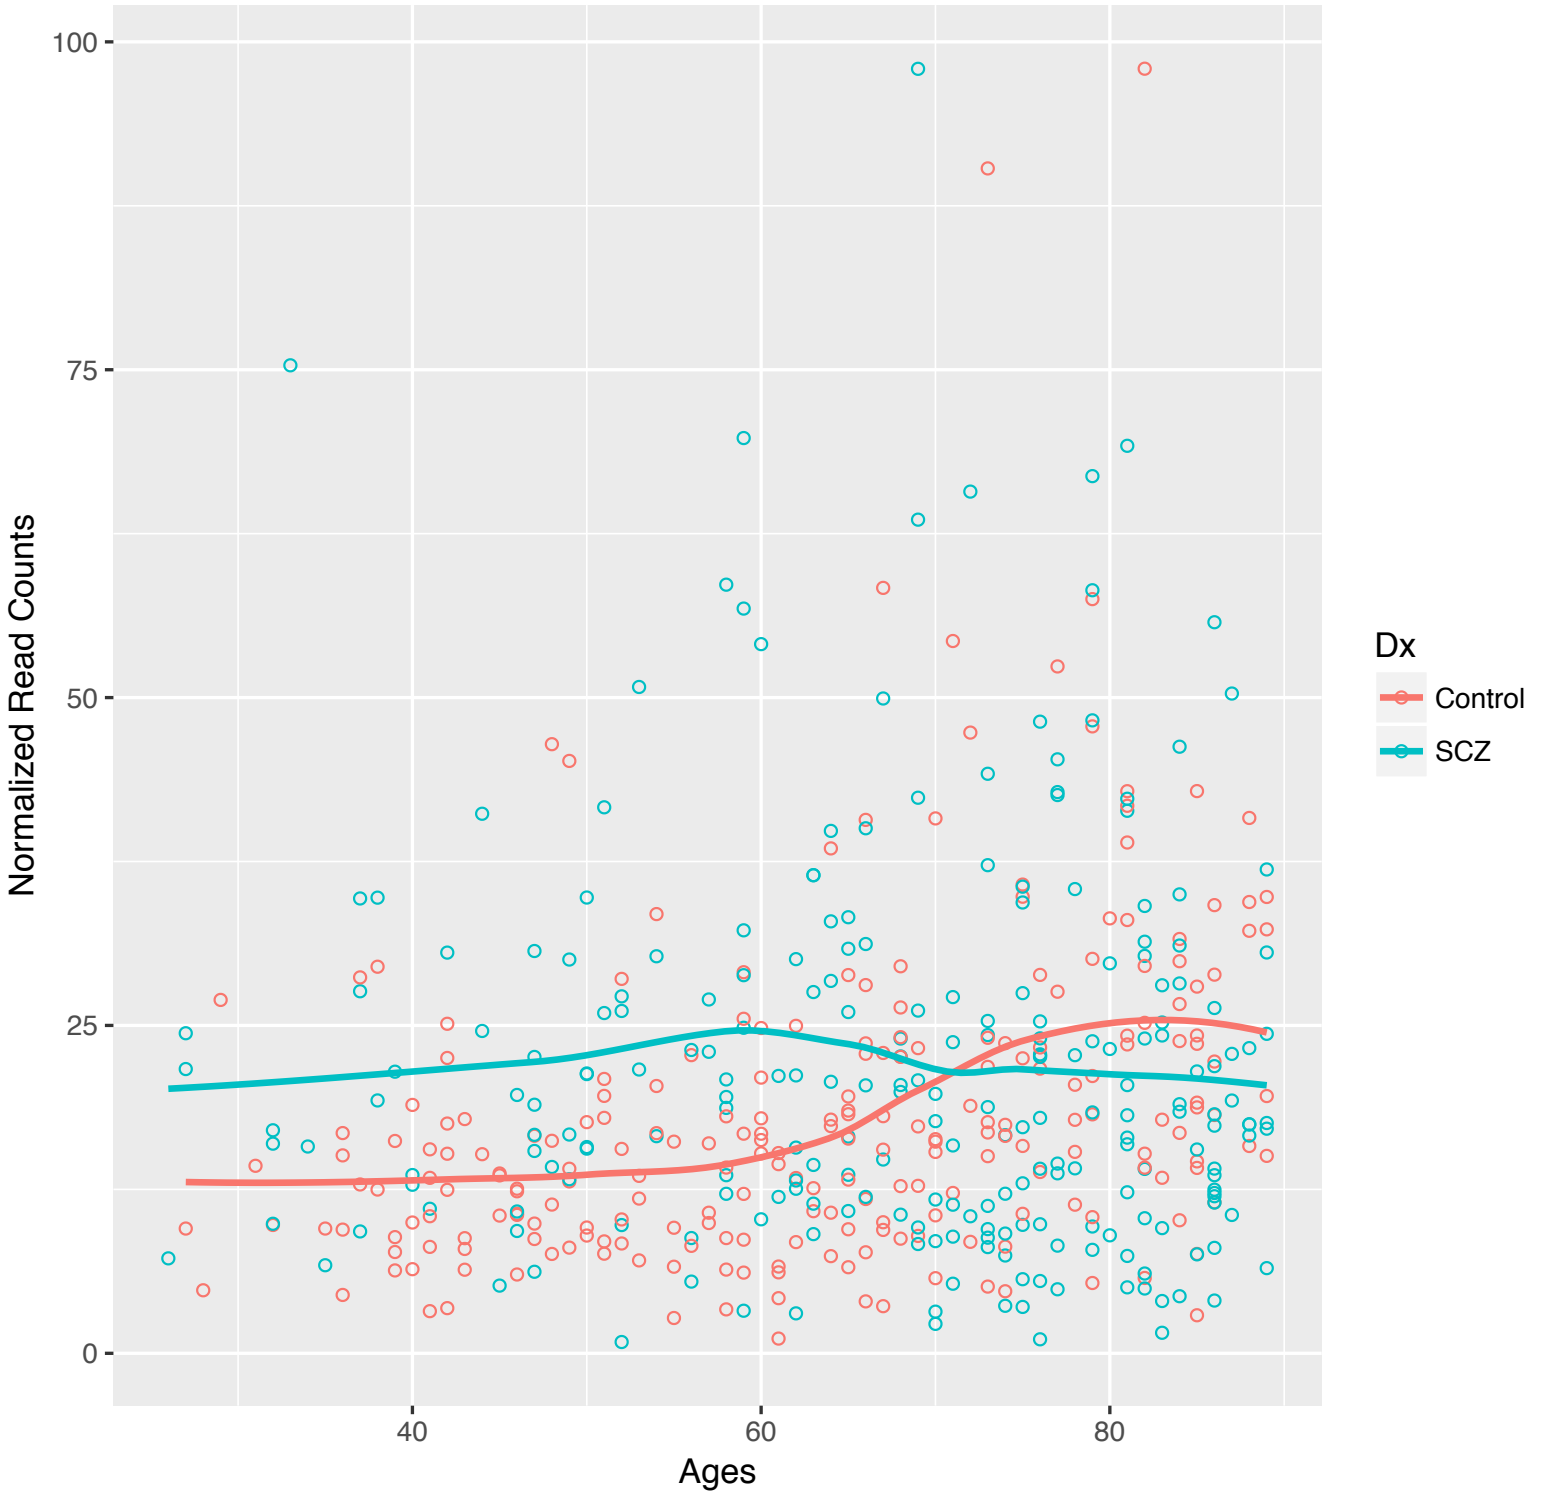

# C4B-AS1

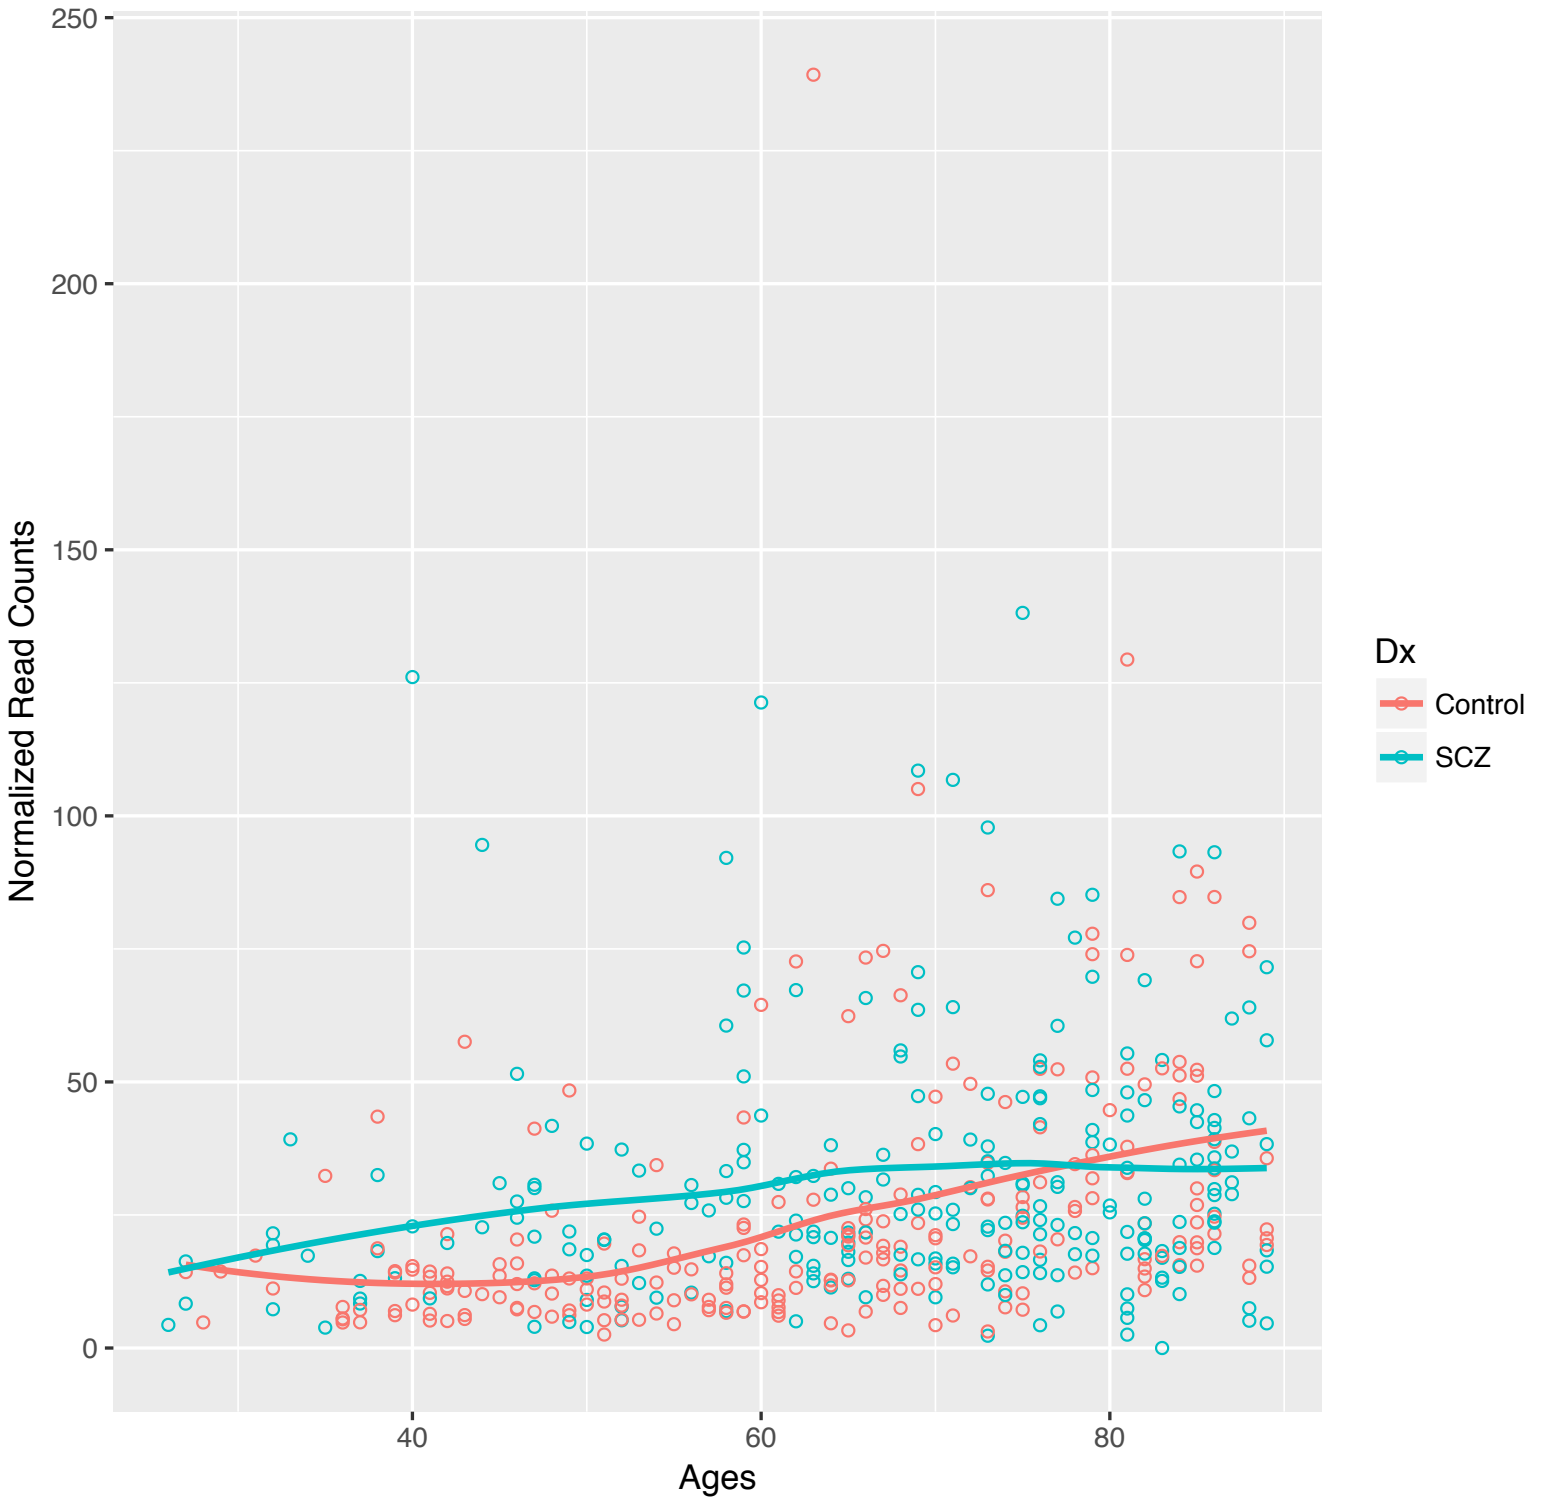

# C4A-AS1

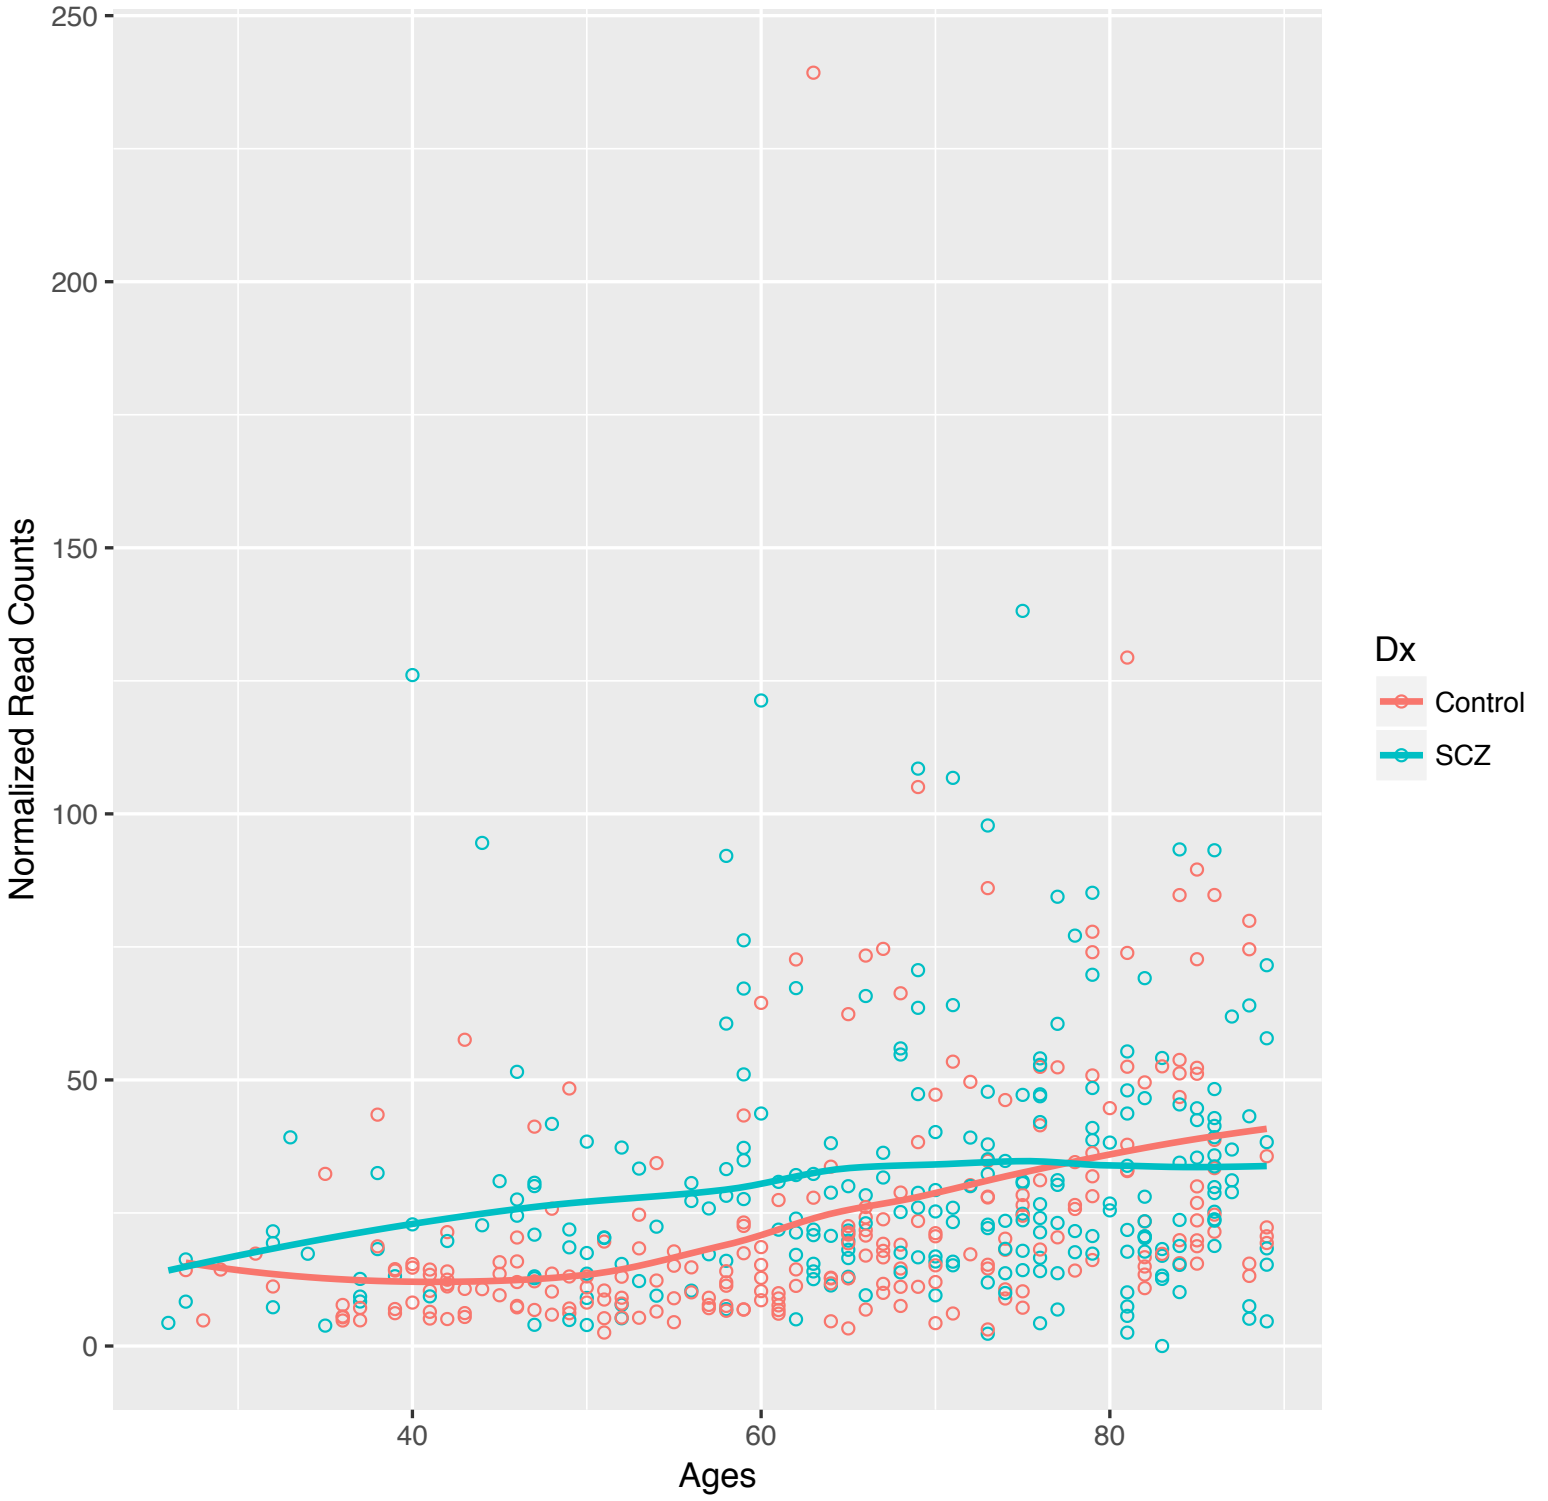

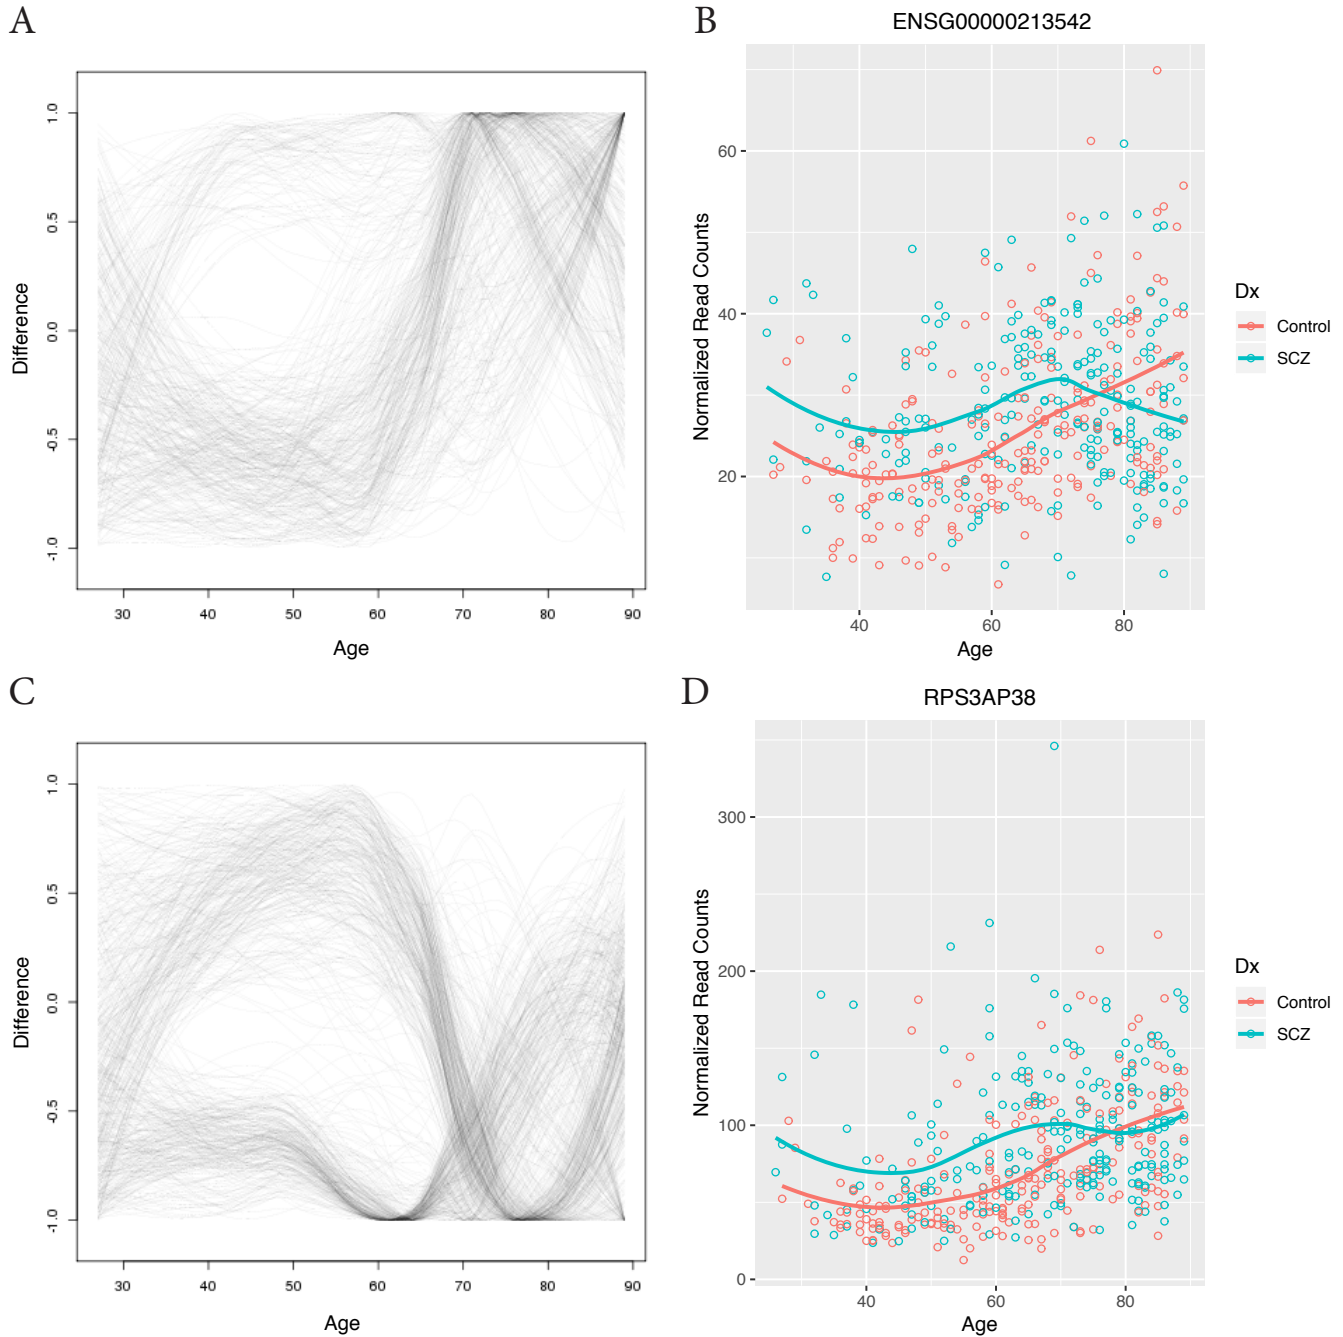

**Supplementary Figure 2: Gene Expression Differences Between Schizophrenia and Control Brains During Aging** The normalized difference in gene expression between schizophrenia and control samples is plotted for ages 25 to 90 for genes identified to be differentially expressed in the CMC (see methods). As the values at each locus are normalized to the observed maximum difference, only values between 1 and -1 are

possible. In order to avoid over plotting, the loci were grouped into those with **A)** positive maximum difference occurring at age 61 or more (405 loci) and **C)** negative maximum difference occurring at age 61 or more (546 loci). **B)** and **D)** are corresponding representative plots of normalized read counts vs age for individual loci in each category with the lowest  $p$ -values. The loess function was used to fit the best line for the data points.

**Histogram of PsychENCODE DESeq2 Analysis  $p$ -values**

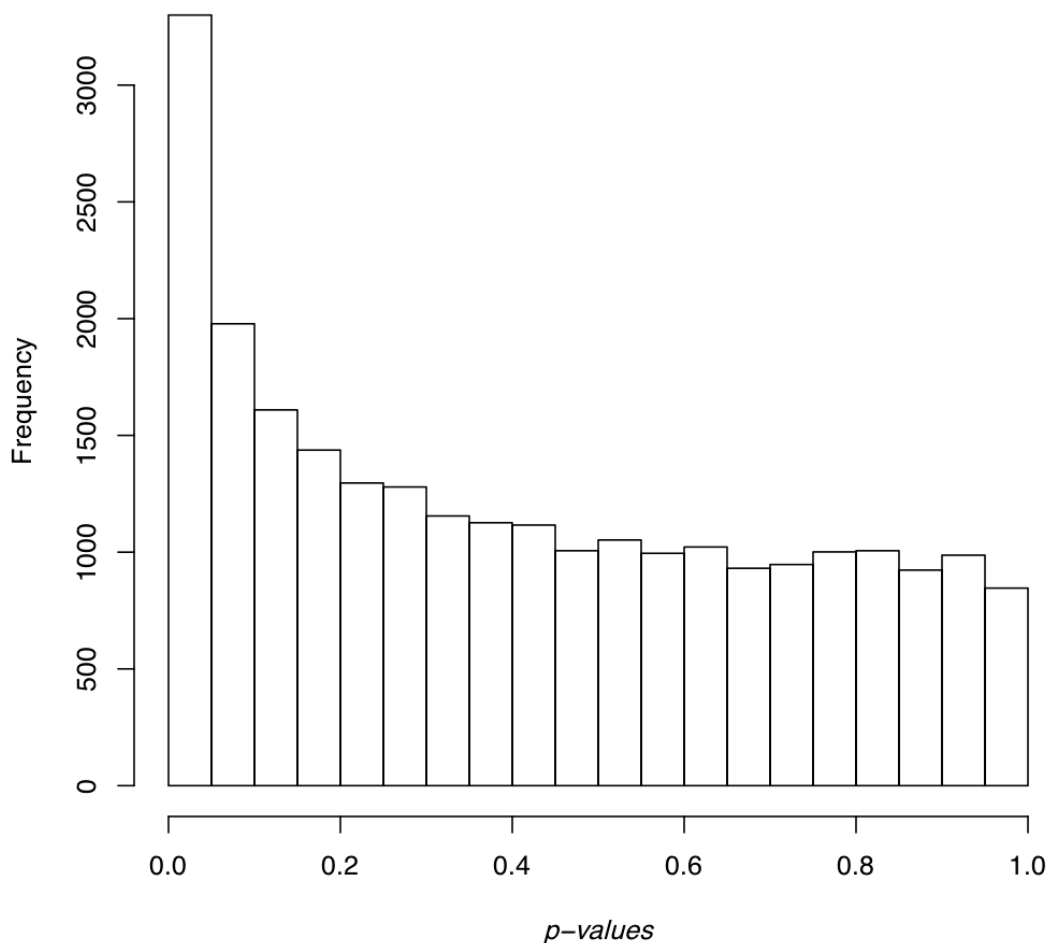

**Supplementary Figure 3: Histogram of PsychEncode DESeq2 Analysis  $p$ -values.** All  $p$ -values from the differential expression analysis including those that are not significant are plotted.

Supplementary Table 1: Differentially Expressed Genes Common to CMC and PE in the 40 to 60 Age Groups

|                 | CMC_log2FC | CMC_padj | PE_log2FC | PE_padj  | Gene        |
|-----------------|------------|----------|-----------|----------|-------------|
| ENSG00000107821 | -0.53      | 1.25E-05 | -0.40     | 3.43E-04 | KAZALD1     |
| ENSG00000103196 | 0.59       | 1.06E-04 | 0.39      | 1.93E-02 | CRISPLD2    |
| ENSG00000229776 | 0.80       | 4.38E-04 | 0.47      | 2.08E-03 | C4B-AS1     |
| ENSG00000233627 | 0.80       | 4.38E-04 | 0.47      | 2.22E-03 | C4A-AS1     |
| ENSG00000101187 | 0.56       | 4.63E-04 | 0.49      | 1.53E-04 | SLCO4A1     |
| ENSG00000168404 | 0.64       | 4.63E-04 | 0.34      | 3.22E-02 | MLKL        |
| ENSG00000101276 | 0.74       | 4.68E-04 | 0.84      | 1.14E-05 | SLC52A3     |
| ENSG00000047617 | 0.38       | 5.86E-04 | 0.37      | 1.20E-03 | ANO2        |
| ENSG00000122863 | 0.46       | 8.00E-04 | 0.50      | 2.07E-05 | CHST3       |
| ENSG00000106648 | -0.33      | 1.92E-03 | -0.33     | 1.12E-02 | GALNTL5     |
| ENSG00000096060 | 0.67       | 2.50E-03 | 1.07      | 5.71E-08 | FKBP5       |
| ENSG00000213700 | 0.48       | 2.50E-03 | 0.29      | 7.82E-02 | RPL17P50    |
| ENSG00000167700 | -0.30      | 2.64E-03 | -0.18     | 2.71E-02 | MFSD3       |
| ENSG00000077238 | 0.70       | 2.70E-03 | 0.76      | 4.54E-06 | IL4R        |
| ENSG00000197021 | -0.26      | 2.89E-03 | -0.11     | 6.30E-02 | CXorf40B    |
| ENSG00000151718 | 0.13       | 3.51E-03 | 0.11      | 5.86E-03 | WWC2        |
| ENSG00000110799 | 0.54       | 3.53E-03 | 0.46      | 2.81E-04 | VWF         |
| ENSG00000197142 | 0.41       | 3.53E-03 | 0.45      | 3.34E-06 | ACSL5       |
| ENSG00000197345 | -0.38      | 3.64E-03 | -0.18     | 9.17E-02 | MRPL21      |
| ENSG00000183943 | 0.31       | 3.67E-03 | 0.36      | 1.82E-04 | PRKX        |
| ENSG00000108641 | -0.22      | 4.01E-03 | -0.11     | 7.96E-02 | B9D1        |
| ENSG00000141485 | -0.43      | 4.01E-03 | -0.27     | 2.18E-02 | SLC13A5     |
| ENSG00000157617 | 0.22       | 4.01E-03 | 0.21      | 3.05E-05 | C2CD2       |
| ENSG00000182916 | -0.33      | 4.01E-03 | -0.26     | 9.89E-04 | TCEAL7      |
| ENSG00000248455 | -0.42      | 4.01E-03 | -0.37     | 2.22E-03 | LINC02217   |
| ENSG00000272449 | -0.42      | 4.01E-03 | -0.33     | 3.83E-02 |             |
| ENSG00000174348 | 0.48       | 4.08E-03 | 0.27      | 3.48E-02 | PODN        |
| ENSG00000162929 | -0.15      | 4.21E-03 | -0.07     | 9.35E-02 | KIAA1841    |
| ENSG00000261716 | 0.33       | 4.55E-03 | 0.26      | 1.02E-03 |             |
| ENSG00000163879 | 0.25       | 4.62E-03 | 0.20      | 2.17E-02 | DNALI1      |
| ENSG00000241158 | 0.47       | 4.67E-03 | 0.54      | 3.50E-03 | ADAMTS9-AS1 |
| ENSG00000267270 | 0.38       | 4.68E-03 | 0.20      | 7.26E-02 | PARD6G-AS1  |
| ENSG00000249436 | -0.41      | 5.20E-03 | -0.30     | 5.47E-03 |             |
| ENSG00000171509 | -0.31      | 5.20E-03 | -0.19     | 2.20E-02 | RXFP1       |
| ENSG00000087087 | 0.22       | 5.23E-03 | -0.12     | 2.84E-02 | SRRT        |
| ENSG00000164112 | -0.33      | 5.23E-03 | -0.24     | 3.24E-03 | TMEM155     |



|                 |       |          |       |          |           |
|-----------------|-------|----------|-------|----------|-----------|
| ENSG00000164258 | -0.32 | 5.23E-03 | -0.20 | 4.33E-02 | NDUFS4    |
| ENSG00000255916 | -0.32 | 5.23E-03 | -0.25 | 2.62E-03 |           |
| ENSG00000178607 | 0.19  | 5.31E-03 | 0.09  | 2.71E-02 | ERN1      |
| ENSG00000137507 | 0.52  | 5.45E-03 | 0.37  | 2.08E-02 | LRRC32    |
| ENSG00000241218 | 0.46  | 5.47E-03 | 0.22  | 7.02E-02 |           |
| ENSG00000161281 | -0.50 | 5.87E-03 | -0.38 | 2.84E-02 | COX7A1    |
| ENSG00000080573 | -0.45 | 5.89E-03 | -0.43 | 1.32E-04 | COL5A3    |
| ENSG00000127507 | 0.66  | 5.89E-03 | 0.44  | 6.23E-04 | ADGRE2    |
| ENSG00000073060 | 0.16  | 5.97E-03 | -0.10 | 6.84E-02 | SCARB1    |
| ENSG00000261455 | -0.43 | 5.97E-03 | -0.22 | 4.61E-02 | LINC01003 |
| ENSG00000179776 | 0.42  | 6.18E-03 | 0.24  | 8.68E-02 | CDH5      |
| ENSG00000250582 | 0.50  | 6.18E-03 | 0.30  | 3.00E-02 | SMAD1-AS2 |
| ENSG00000130052 | 0.28  | 6.24E-03 | 0.27  | 1.57E-02 | STARD8    |
| ENSG00000162241 | -0.24 | 6.71E-03 | -0.21 | 2.21E-03 | SLC25A45  |
| ENSG00000249717 | 0.51  | 7.45E-03 | 0.25  | 4.20E-03 |           |
| ENSG00000001617 | 0.44  | 8.14E-03 | 0.58  | 1.31E-05 | SEMA3F    |
| ENSG00000158792 | -0.35 | 8.36E-03 | -0.44 | 1.09E-04 | SPATA2L   |
| ENSG00000115604 | 0.90  | 8.36E-03 | 1.06  | 1.79E-03 | IL18R1    |
| ENSG00000077150 | 0.46  | 8.78E-03 | 0.29  | 4.26E-02 | NFKB2     |
| ENSG00000103253 | -0.30 | 8.89E-03 | -0.22 | 1.08E-02 | HAGHL     |
| ENSG00000236841 | -0.37 | 8.89E-03 | -0.28 | 6.16E-02 |           |
| ENSG00000271824 | -0.52 | 9.06E-03 | -0.46 | 2.22E-03 | SMIM32    |
| ENSG00000105227 | 0.36  | 9.19E-03 | 0.32  | 1.42E-02 | PRX       |
| ENSG00000136297 | -0.50 | 9.19E-03 | -0.52 | 6.09E-06 | MMD2      |
| ENSG00000197620 | -0.25 | 9.19E-03 | -0.14 | 3.75E-02 | CXorf40A  |
| ENSG00000171502 | -0.31 | 9.26E-03 | -0.36 | 1.47E-04 | COL24A1   |
| ENSG00000184887 | -0.21 | 9.52E-03 | -0.16 | 2.06E-03 | BTBD6     |
| ENSG00000136011 | 0.49  | 9.78E-03 | 0.45  | 3.07E-03 | STAB2     |
| ENSG00000143198 | -0.24 | 9.93E-03 | -0.15 | 7.39E-02 | MGST3     |
| ENSG00000179774 | -0.36 | 9.93E-03 | -0.36 | 7.39E-03 | ATOH7     |
| ENSG00000100626 | 0.24  | 1.08E-02 | 0.20  | 7.26E-04 | GALNT16   |
| ENSG00000157778 | -0.29 | 1.08E-02 | -0.25 | 5.77E-04 | PSMG3     |
| ENSG00000115226 | -0.22 | 1.10E-02 | -0.21 | 1.51E-03 | FNDC4     |
| ENSG00000196465 | -0.25 | 1.10E-02 | -0.20 | 5.11E-04 | MYL6B     |
| ENSG00000103254 | -0.40 | 1.10E-02 | -0.20 | 5.01E-02 | FAM173A   |
| ENSG00000144635 | -0.17 | 1.10E-02 | -0.15 | 3.96E-04 | DYNC1LI1  |
| ENSG00000133131 | 0.19  | 1.11E-02 | 0.17  | 3.88E-02 | MORC4     |
| ENSG00000173566 | -0.31 | 1.12E-02 | -0.29 | 8.45E-04 | NA        |
| ENSG00000086506 | -0.40 | 1.13E-02 | -0.45 | 1.51E-02 | HBQ1      |

|                 |       |          |       |          |           |
|-----------------|-------|----------|-------|----------|-----------|
| ENSG00000089159 | 0.28  | 1.13E-02 | 0.15  | 7.36E-02 | PXN       |
| ENSG00000167515 | -0.20 | 1.14E-02 | -0.17 | 1.91E-02 | TRAPPC2L  |
| ENSG00000224431 | 0.49  | 1.20E-02 | 0.39  | 9.90E-03 |           |
| ENSG00000101222 | -0.35 | 1.21E-02 | -0.31 | 2.15E-04 | SPEF1     |
| ENSG00000182327 | -0.33 | 1.21E-02 | -0.23 | 7.32E-02 | GLTPD2    |
| ENSG00000065057 | -0.25 | 1.21E-02 | -0.15 | 5.45E-02 | NTHL1     |
| ENSG00000213753 | -0.12 | 1.22E-02 | -0.09 | 5.97E-02 | CENPBD1P1 |
| ENSG00000223401 | 0.60  | 1.23E-02 | 0.39  | 6.72E-02 | NA        |
| ENSG00000115073 | -0.25 | 1.24E-02 | -0.11 | 5.99E-02 | ACTR1B    |
| ENSG00000188690 | -0.22 | 1.26E-02 | -0.19 | 5.33E-03 | UROS      |
| ENSG00000059728 | 0.17  | 1.29E-02 | 0.10  | 5.34E-02 | MXD1      |
| ENSG00000121060 | 0.23  | 1.29E-02 | 0.20  | 2.35E-03 | TRIM25    |
| ENSG00000185608 | -0.19 | 1.31E-02 | -0.13 | 8.35E-02 | MRPL40    |
| ENSG00000102547 | -0.17 | 1.37E-02 | -0.12 | 2.44E-02 | CAB39L    |
| ENSG00000115361 | 0.23  | 1.41E-02 | 0.36  | 1.91E-04 | ACADL     |
| ENSG00000263874 | -0.24 | 1.41E-02 | -0.18 | 6.80E-03 | LINC00672 |
| ENSG00000173542 | 0.16  | 1.44E-02 | 0.16  | 2.84E-03 | MOB1B     |
| ENSG00000270300 | 0.33  | 1.45E-02 | 0.21  | 2.17E-02 | PHACTR2P1 |
| ENSG00000116237 | -0.15 | 1.46E-02 | -0.17 | 2.24E-04 | ICMT      |
| ENSG00000172465 | -0.22 | 1.46E-02 | -0.16 | 1.01E-02 | TCEAL1    |
| ENSG00000115514 | -0.22 | 1.50E-02 | -0.12 | 3.23E-02 | TXNDC9    |
| ENSG00000231752 | -0.22 | 1.51E-02 | -0.18 | 2.74E-02 | EMBP1     |
| ENSG00000103319 | 0.18  | 1.52E-02 | 0.22  | 6.49E-04 | EEF2K     |
| ENSG00000162302 | -0.19 | 1.53E-02 | -0.20 | 2.67E-03 | RPS6KA4   |
| ENSG00000105419 | -0.23 | 1.65E-02 | -0.20 | 2.64E-02 | MEIS3     |
| ENSG00000130589 | 0.40  | 1.65E-02 | 0.34  | 3.35E-02 | HELZ2     |
| ENSG00000172059 | 0.22  | 1.65E-02 | 0.21  | 1.50E-02 | KLF11     |
| ENSG00000138741 | -0.24 | 1.67E-02 | -0.24 | 6.69E-03 | TRPC3     |
| ENSG00000090266 | -0.32 | 1.71E-02 | -0.22 | 1.90E-02 | NDUFB2    |
| ENSG00000105393 | -0.26 | 1.71E-02 | -0.13 | 9.52E-03 | BABAM1    |
| ENSG00000164604 | -0.18 | 1.77E-02 | -0.24 | 3.98E-04 | GPR85     |
| ENSG00000035687 | -0.18 | 1.77E-02 | -0.11 | 6.04E-02 | ADSS      |
| ENSG00000074527 | -0.20 | 1.77E-02 | -0.20 | 1.27E-02 | NTN4      |
| ENSG00000166681 | -0.27 | 1.78E-02 | -0.18 | 4.72E-02 | BEX3      |
| ENSG00000100804 | -0.24 | 1.80E-02 | -0.18 | 1.85E-02 | PSMB5     |
| ENSG00000113083 | 0.23  | 1.80E-02 | 0.25  | 8.12E-04 | LOX       |
| ENSG00000224389 | 0.58  | 1.81E-02 | 0.32  | 7.71E-02 | C4B       |
| ENSG00000183864 | 0.23  | 1.81E-02 | 0.12  | 7.16E-02 | TOB2      |
| ENSG00000066697 | -0.17 | 1.82E-02 | -0.12 | 2.24E-02 | MSANTD3   |

|                 |       |          |       |          |           |
|-----------------|-------|----------|-------|----------|-----------|
| ENSG00000122884 | 0.27  | 1.82E-02 | 0.16  | 8.78E-02 | P4HA1     |
| ENSG00000178741 | -0.22 | 1.82E-02 | -0.18 | 4.55E-02 | COX5A     |
| ENSG00000074071 | -0.23 | 1.82E-02 | -0.14 | 8.61E-02 | MRPS34    |
| ENSG00000109906 | 0.19  | 1.82E-02 | 0.24  | 9.45E-03 | ZBTB16    |
| ENSG00000150457 | 0.30  | 1.82E-02 | 0.22  | 3.50E-02 | LATS2     |
| ENSG00000158806 | -0.23 | 1.82E-02 | -0.18 | 1.37E-06 | NPM2      |
| ENSG00000163832 | -0.18 | 1.82E-02 | -0.18 | 1.54E-04 | ELP6      |
| ENSG00000168477 | 0.21  | 1.82E-02 | 0.19  | 7.16E-02 | TNXB      |
| ENSG00000114423 | 0.17  | 1.83E-02 | 0.14  | 5.65E-04 | CBLB      |
| ENSG00000242173 | -0.27 | 1.83E-02 | -0.21 | 2.62E-02 | ARHGDIG   |
| ENSG00000100379 | -0.19 | 1.84E-02 | -0.20 | 6.92E-04 | KCTD17    |
| ENSG00000134375 | -0.24 | 1.84E-02 | -0.17 | 7.14E-02 | TIMM17A   |
| ENSG00000170745 | -0.27 | 1.85E-02 | -0.31 | 2.30E-04 | KCNS3     |
| ENSG00000188051 | -0.30 | 1.87E-02 | -0.26 | 1.29E-03 | TMEM221   |
| ENSG00000124205 | -0.37 | 1.87E-02 | -0.45 | 2.95E-04 | EDN3      |
| ENSG00000086504 | -0.23 | 1.87E-02 | -0.22 | 2.67E-03 | MRPL28    |
| ENSG00000184207 | -0.22 | 1.87E-02 | -0.12 | 5.46E-02 | PGP       |
| ENSG00000205704 | -0.28 | 1.87E-02 | -0.21 | 3.30E-02 | LINC00634 |
| ENSG00000214253 | -0.25 | 1.87E-02 | -0.26 | 3.91E-03 | FIS1      |
| ENSG00000090971 | -0.25 | 1.88E-02 | -0.14 | 5.20E-02 | NAT14     |
| ENSG00000174939 | -0.27 | 1.89E-02 | -0.22 | 3.69E-03 | ASPHD1    |
| ENSG00000105717 | 0.26  | 1.90E-02 | 0.23  | 7.94E-02 | PBX4      |
| ENSG00000164620 | -0.25 | 1.90E-02 | -0.23 | 3.31E-03 | RELL2     |
| ENSG00000149761 | -0.23 | 1.91E-02 | -0.15 | 3.54E-02 | NUDT22    |
| ENSG00000128185 | -0.21 | 1.92E-02 | -0.13 | 9.18E-02 | DGCR6L    |
| ENSG00000225684 | 0.48  | 1.92E-02 | 0.44  | 1.95E-02 | FAM225B   |
| ENSG00000131480 | 0.38  | 1.92E-02 | 0.21  | 5.53E-02 | AOC2      |
| ENSG00000125843 | -0.18 | 1.92E-02 | -0.13 | 4.16E-02 | AP5S1     |
| ENSG00000232374 | 0.35  | 1.95E-02 | 0.27  | 3.26E-02 | GPR79     |
| ENSG00000213888 | -0.24 | 1.99E-02 | -0.17 | 8.03E-02 | LINC01521 |
| ENSG00000103316 | -0.31 | 2.00E-02 | -0.29 | 3.36E-04 | CRYM      |
| ENSG00000125877 | -0.23 | 2.00E-02 | -0.16 | 5.63E-02 | ITPA      |
| ENSG00000113369 | 0.34  | 2.03E-02 | 0.37  | 1.76E-04 | ARRDC3    |
| ENSG00000089356 | 0.37  | 2.04E-02 | 0.38  | 5.22E-04 | FXD3      |
| ENSG00000109255 | -0.49 | 2.07E-02 | -0.52 | 5.71E-03 | NMU       |
| ENSG00000142627 | 0.45  | 2.09E-02 | 0.52  | 7.06E-03 | EPHA2     |
| ENSG00000129355 | -0.27 | 2.10E-02 | -0.17 | 7.44E-03 | CDKN2D    |
| ENSG00000127540 | -0.19 | 2.16E-02 | -0.16 | 5.27E-03 | UQCR11    |
| ENSG00000154309 | 0.21  | 2.20E-02 | 0.12  | 4.73E-02 | DISP1     |

|                 |       |          |       |          |             |
|-----------------|-------|----------|-------|----------|-------------|
| ENSG00000162076 | -0.19 | 2.20E-02 | -0.18 | 5.87E-03 | FLYWCH2     |
| ENSG00000151655 | -0.35 | 2.24E-02 | -0.26 | 1.36E-02 | ITIH2       |
| ENSG00000272944 | -0.29 | 2.24E-02 | -0.35 | 3.69E-05 |             |
| ENSG00000258861 | -0.36 | 2.25E-02 | -0.27 | 2.43E-02 | MIR381HG    |
| ENSG00000129158 | -0.17 | 2.27E-02 | -0.07 | 6.96E-02 | SERGEF      |
| ENSG00000137133 | -0.21 | 2.27E-02 | -0.21 | 4.61E-03 | HINT2       |
| ENSG00000244731 | 0.55  | 2.27E-02 | 0.31  | 6.98E-02 | C4A         |
| ENSG00000170634 | -0.16 | 2.27E-02 | -0.14 | 7.00E-02 | ACYP2       |
| ENSG00000161642 | -0.28 | 2.29E-02 | -0.24 | 1.38E-04 | ZNF385A     |
| ENSG00000133169 | -0.30 | 2.30E-02 | -0.23 | 1.66E-02 | BEX1        |
| ENSG00000231528 | 0.45  | 2.30E-02 | 0.40  | 2.68E-02 | FAM225A     |
| ENSG00000241684 | 0.22  | 2.38E-02 | 0.38  | 7.18E-07 | ADAMTS9-AS2 |
| ENSG00000261668 | 0.34  | 2.38E-02 | 0.46  | 5.33E-03 |             |
| ENSG00000090376 | 0.37  | 2.39E-02 | 0.38  | 2.48E-03 | IRAK3       |
| ENSG00000153233 | -0.15 | 2.40E-02 | -0.13 | 5.04E-02 | PTPRR       |
| ENSG00000106404 | 0.23  | 2.41E-02 | -0.18 | 6.95E-02 | CLDN15      |
| ENSG00000173436 | -0.18 | 2.41E-02 | -0.14 | 8.10E-03 | MINOS1      |
| ENSG00000166451 | -0.20 | 2.42E-02 | -0.12 | 5.95E-02 | CENPN       |
| ENSG00000125901 | -0.20 | 2.42E-02 | -0.13 | 2.99E-02 | MRPS26      |
| ENSG00000197261 | -0.56 | 2.43E-02 | -0.62 | 1.64E-03 | C6orf141    |
| ENSG00000158457 | 0.17  | 2.44E-02 | 0.24  | 5.78E-03 | TSPAN33     |
| ENSG00000231185 | -0.31 | 2.44E-02 | -0.35 | 1.28E-03 | SPRY4-AS1   |
| ENSG00000102595 | -0.10 | 2.55E-02 | 0.11  | 2.01E-02 | UGGT2       |
| ENSG00000235944 | -0.20 | 2.56E-02 | -0.11 | 5.34E-02 | ZNF815P     |
| ENSG00000170365 | 0.21  | 2.56E-02 | 0.17  | 5.77E-04 | SMAD1       |
| ENSG00000140798 | -0.32 | 2.73E-02 | -0.41 | 2.13E-06 | ABCC12      |
| ENSG00000115641 | -0.16 | 2.73E-02 | -0.19 | 1.08E-03 | FHL2        |
| ENSG00000196976 | -0.29 | 2.75E-02 | -0.20 | 7.82E-02 | LAGE3       |
| ENSG00000108219 | 0.17  | 2.76E-02 | 0.11  | 4.52E-02 | TSPAN14     |
| ENSG00000138028 | -0.22 | 2.76E-02 | -0.14 | 3.38E-02 | CGREF1      |
| ENSG00000148334 | -0.18 | 2.76E-02 | -0.13 | 2.09E-02 | PTGES2      |
| ENSG00000034152 | 0.28  | 2.79E-02 | 0.19  | 6.21E-02 | MAP2K3      |
| ENSG00000107554 | 0.18  | 2.85E-02 | 0.13  | 4.04E-03 | DNMBP       |
| ENSG00000139083 | 0.22  | 2.85E-02 | 0.14  | 9.54E-02 | ETV6        |
| ENSG00000213619 | -0.19 | 2.85E-02 | -0.17 | 1.71E-02 | NDUFS3      |
| ENSG00000255568 | -0.31 | 2.85E-02 | -0.22 | 6.90E-02 | BRWD1-AS2   |
| ENSG00000175182 | -0.23 | 2.85E-02 | -0.22 | 2.72E-04 | FAM131A     |
| ENSG00000165916 | -0.18 | 2.86E-02 | -0.20 | 1.44E-03 | PSMC3       |
| ENSG00000250031 | 0.32  | 2.87E-02 | 0.14  | 5.98E-02 |             |

|                 |       |          |       |          |          |
|-----------------|-------|----------|-------|----------|----------|
| ENSG00000091409 | 0.24  | 2.91E-02 | 0.14  | 4.28E-02 | ITGA6    |
| ENSG00000124702 | -0.22 | 2.95E-02 | -0.16 | 1.11E-02 | KLHDC3   |
| ENSG00000174775 | -0.16 | 2.95E-02 | -0.12 | 7.86E-02 | HRAS     |
| ENSG00000184515 | -0.35 | 3.00E-02 | -0.27 | 3.17E-02 | BEX5     |
| ENSG00000137731 | 0.40  | 3.00E-02 | 0.36  | 1.44E-02 | FXYD2    |
| ENSG00000167705 | -0.21 | 3.00E-02 | -0.18 | 5.95E-02 | RILP     |
| ENSG00000163297 | 0.17  | 3.01E-02 | 0.17  | 3.06E-02 | ANTXR2   |
| ENSG00000163964 | -0.14 | 3.01E-02 | -0.10 | 5.86E-02 | PIGX     |
| ENSG00000155959 | -0.21 | 3.03E-02 | -0.12 | 9.97E-02 | VBP1     |
| ENSG00000087116 | 0.36  | 3.08E-02 | 0.73  | 3.57E-07 | ADAMTS2  |
| ENSG00000167779 | -0.23 | 3.08E-02 | -0.33 | 1.75E-03 | IGFBP6   |
| ENSG00000198315 | 0.13  | 3.09E-02 | 0.10  | 2.50E-02 | ZKSCAN8  |
| ENSG00000104872 | -0.19 | 3.09E-02 | -0.23 | 2.46E-05 | PIH1D1   |
| ENSG00000126432 | -0.22 | 3.09E-02 | -0.17 | 3.35E-02 | PRDX5    |
| ENSG00000090539 | -0.17 | 3.11E-02 | -0.11 | 9.14E-02 | CHRD     |
| ENSG00000101189 | -0.14 | 3.11E-02 | -0.11 | 4.70E-02 | MRGBP    |
| ENSG00000004799 | 0.39  | 3.12E-02 | 0.45  | 1.16E-03 | PDK4     |
| ENSG00000171159 | -0.20 | 3.15E-02 | -0.18 | 8.20E-02 | C9orf16  |
| ENSG00000125503 | -0.17 | 3.16E-02 | -0.19 | 9.66E-03 | PPP1R12C |
| ENSG00000138623 | -0.17 | 3.16E-02 | -0.24 | 3.81E-04 | SEMA7A   |
| ENSG00000186081 | -0.51 | 3.16E-02 | -0.42 | 2.90E-02 | KRT5     |
| ENSG00000158683 | 0.27  | 3.17E-02 | 0.21  | 2.78E-02 | PKD1L1   |
| ENSG00000130244 | -0.19 | 3.20E-02 | -0.14 | 8.94E-03 | FAM98C   |
| ENSG00000174521 | -0.29 | 3.20E-02 | -0.29 | 4.83E-04 | TTC9B    |
| ENSG00000169432 | 0.20  | 3.20E-02 | 0.26  | 5.49E-03 | SCN9A    |
| ENSG00000117682 | -0.11 | 3.22E-02 | -0.12 | 1.07E-03 | DHDDS    |
| ENSG00000144834 | -0.28 | 3.23E-02 | -0.22 | 3.53E-03 | TAGLN3   |
| ENSG00000185115 | -0.15 | 3.23E-02 | -0.15 | 9.58E-04 | NSMCE3   |
| ENSG00000138604 | -0.16 | 3.25E-02 | -0.12 | 4.78E-03 | GLCE     |
| ENSG00000178980 | -0.23 | 3.25E-02 | -0.18 | 2.18E-02 | SELENOW  |
| ENSG00000030419 | 0.20  | 3.28E-02 | 0.34  | 3.76E-05 | IKZF2    |
| ENSG00000003989 | 0.36  | 3.33E-02 | 0.55  | 9.26E-06 | SLC7A2   |
| ENSG00000082293 | -0.16 | 3.33E-02 | -0.14 | 2.72E-02 | COL19A1  |
| ENSG00000116771 | -0.23 | 3.36E-02 | -0.23 | 1.22E-02 | AGMAT    |
| ENSG00000180992 | -0.24 | 3.39E-02 | -0.17 | 3.58E-02 | MRPL14   |
| ENSG00000249915 | -0.17 | 3.41E-02 | -0.11 | 1.67E-02 | PDCD6    |
| ENSG00000105639 | 0.27  | 3.42E-02 | 0.27  | 6.37E-04 | JAK3     |
| ENSG00000127364 | 0.26  | 3.49E-02 | 0.20  | 2.48E-03 | TAS2R4   |
| ENSG00000163382 | -0.18 | 3.49E-02 | -0.13 | 1.72E-02 | NAXE     |

|                 |       |          |       |          |          |
|-----------------|-------|----------|-------|----------|----------|
| ENSG00000130702 | 0.20  | 3.50E-02 | 0.16  | 8.61E-02 | LAMA5    |
| ENSG00000254656 | -0.27 | 3.53E-02 | -0.24 | 2.59E-03 | RTL1     |
| ENSG00000185885 | 0.47  | 3.53E-02 | 0.38  | 8.95E-02 | IFITM1   |
| ENSG00000099901 | -0.20 | 3.54E-02 | -0.10 | 4.11E-02 | RANBP1   |
| ENSG00000131873 | 0.17  | 3.58E-02 | 0.17  | 4.80E-03 | CHSY1    |
| ENSG00000133265 | -0.19 | 3.58E-02 | -0.23 | 6.60E-04 | HSPBP1   |
| ENSG00000187778 | -0.13 | 3.58E-02 | -0.13 | 1.58E-02 | MCRS1    |
| ENSG00000251348 | 0.30  | 3.58E-02 | 0.42  | 1.74E-05 | HSPD1P11 |
| ENSG00000154930 | -0.28 | 3.62E-02 | -0.18 | 8.96E-02 | ACSS1    |
| ENSG00000157833 | -0.29 | 3.62E-02 | -0.31 | 1.50E-03 | GAREM2   |
| ENSG00000145681 | -0.25 | 3.64E-02 | -0.25 | 3.76E-03 | HAPLN1   |
| ENSG00000106367 | -0.26 | 3.64E-02 | -0.23 | 6.63E-04 | AP1S1    |
| ENSG00000253457 | -0.27 | 3.65E-02 | -0.23 | 3.26E-02 | SMIM18   |
| ENSG00000235863 | -0.17 | 3.67E-02 | -0.22 | 1.77E-03 | B3GALT4  |
| ENSG00000252010 | -0.65 | 3.68E-02 | -0.30 | 2.87E-02 | SCARNA5  |
| ENSG00000102554 | 0.24  | 3.70E-02 | 0.30  | 5.22E-03 | KLF5     |
| ENSG00000136280 | -0.13 | 3.71E-02 | -0.13 | 1.67E-02 | CCM2     |
| ENSG00000057593 | -0.29 | 3.76E-02 | -0.27 | 2.11E-02 | F7       |
| ENSG00000068078 | -0.26 | 3.76E-02 | -0.24 | 2.49E-02 | FGFR3    |
| ENSG00000126088 | -0.16 | 3.76E-02 | -0.20 | 1.35E-02 | UROD     |
| ENSG00000197363 | -0.13 | 3.78E-02 | -0.12 | 4.01E-02 | ZNF517   |
| ENSG00000180616 | -0.21 | 3.80E-02 | -0.21 | 1.75E-02 | SSTR2    |
| ENSG00000182541 | 0.26  | 3.81E-02 | 0.21  | 4.77E-03 | LIMK2    |
| ENSG00000187094 | -0.30 | 3.82E-02 | -0.24 | 6.81E-02 | CCK      |
| ENSG00000172053 | -0.13 | 3.83E-02 | -0.19 | 8.70E-06 | QARS     |
| ENSG00000175906 | -0.29 | 3.87E-02 | -0.36 | 1.91E-04 | ARL4D    |
| ENSG00000143036 | 0.29  | 3.89E-02 | 0.36  | 1.10E-04 | SLC44A3  |
| ENSG00000119787 | -0.11 | 3.90E-02 | 0.08  | 4.06E-02 | ATL2     |
| ENSG00000124733 | -0.20 | 3.90E-02 | -0.26 | 6.03E-05 | MEA1     |
| ENSG00000226530 | 0.22  | 3.92E-02 | 0.27  | 1.33E-02 |          |
| ENSG00000101052 | -0.16 | 3.92E-02 | -0.09 | 8.63E-02 | IFT52    |
| ENSG00000230551 | 0.16  | 4.01E-02 | 0.16  | 2.16E-02 |          |
| ENSG00000100625 | 0.20  | 4.01E-02 | 0.40  | 2.12E-04 | SIX4     |
| ENSG00000167434 | -0.24 | 4.01E-02 | -0.27 | 1.66E-03 | CA4      |
| ENSG00000134594 | -0.22 | 4.02E-02 | -0.26 | 3.45E-04 | RAB33A   |
| ENSG00000149131 | 0.29  | 4.02E-02 | 0.24  | 4.15E-03 | SERPING1 |
| ENSG00000063180 | -0.22 | 4.03E-02 | -0.37 | 9.47E-05 | CA11     |
| ENSG00000214941 | -0.19 | 4.06E-02 | -0.11 | 9.34E-02 | ZSWIM7   |
| ENSG00000114395 | -0.21 | 4.08E-02 | -0.17 | 2.28E-02 | CYB561D2 |

|                 |       |          |       |          |           |
|-----------------|-------|----------|-------|----------|-----------|
| ENSG00000104611 | 0.26  | 4.10E-02 | 0.23  | 1.30E-02 | SH2D4A    |
| ENSG00000175104 | 0.15  | 4.10E-02 | 0.14  | 1.60E-04 | TRAF6     |
| ENSG00000265996 | -0.34 | 4.10E-02 | -0.47 | 5.88E-03 | MIR3671   |
| ENSG00000187953 | -0.12 | 4.14E-02 | -0.10 | 3.72E-02 | PMS2CL    |
| ENSG00000164761 | 0.43  | 4.16E-02 | 0.49  | 2.40E-03 | TNFRSF11B |
| ENSG00000053372 | -0.17 | 4.16E-02 | -0.15 | 5.73E-03 | MRTO4     |
| ENSG00000143494 | 0.21  | 4.18E-02 | 0.35  | 9.26E-06 | VASH2     |
| ENSG00000161981 | -0.20 | 4.18E-02 | -0.23 | 3.35E-03 | SNRNP25   |
| ENSG00000165806 | 0.28  | 4.23E-02 | 0.32  | 3.23E-03 | CASP7     |
| ENSG00000167733 | -0.22 | 4.23E-02 | -0.18 | 5.58E-03 | HSD11B1L  |
| ENSG00000185272 | -0.17 | 4.25E-02 | 0.15  | 6.17E-02 | RBM11     |
| ENSG00000187601 | -0.19 | 4.28E-02 | -0.11 | 8.37E-02 | MAGEH1    |
| ENSG00000227544 | -0.35 | 4.29E-02 | -0.52 | 2.36E-05 |           |
| ENSG00000041357 | -0.16 | 4.29E-02 | -0.17 | 1.62E-02 | PSMA4     |
| ENSG00000175602 | -0.30 | 4.30E-02 | -0.18 | 8.37E-02 | CCDC85B   |
| ENSG00000172009 | -0.14 | 4.34E-02 | -0.10 | 5.39E-02 | THOP1     |
| ENSG00000221838 | -0.13 | 4.35E-02 | -0.17 | 1.95E-03 | AP4M1     |
| ENSG00000273270 | -0.24 | 4.36E-02 | -0.11 | 5.17E-02 |           |
| ENSG00000146411 | 0.15  | 4.41E-02 | 0.19  | 3.29E-03 | SLC2A12   |
| ENSG00000107738 | 0.29  | 4.44E-02 | 0.33  | 2.04E-03 | VSIR      |
| ENSG00000172115 | -0.22 | 4.49E-02 | -0.14 | 9.66E-02 | CYCS      |
| ENSG00000089123 | -0.13 | 4.51E-02 | -0.08 | 5.01E-02 | TASP1     |
| ENSG00000245532 | 0.45  | 4.55E-02 | 0.42  | 9.68E-03 | NEAT1     |
| ENSG00000187556 | -0.25 | 4.57E-02 | -0.25 | 8.92E-03 | NANOS3    |
| ENSG00000141469 | 0.48  | 4.57E-02 | 0.96  | 3.68E-06 | SLC14A1   |
| ENSG00000100276 | -0.29 | 4.57E-02 | -0.42 | 5.10E-06 | RASL10A   |
| ENSG00000168734 | -0.16 | 4.57E-02 | -0.13 | 2.97E-02 | PKIG      |
| ENSG00000081320 | 0.29  | 4.57E-02 | 0.55  | 2.71E-09 | STK17B    |
| ENSG00000130520 | -0.18 | 4.58E-02 | -0.12 | 6.23E-02 | LSM4      |
| ENSG00000129116 | 0.20  | 4.59E-02 | 0.20  | 1.40E-04 | PALLD     |
| ENSG00000178878 | 0.48  | 4.59E-02 | 0.54  | 5.35E-02 | APOLD1    |
| ENSG00000196262 | -0.18 | 4.59E-02 | -0.24 | 9.79E-03 | PPIA      |
| ENSG00000198517 | -0.23 | 4.59E-02 | -0.29 | 1.29E-02 | MAFK      |
| ENSG00000007866 | 0.30  | 4.60E-02 | 0.29  | 5.52E-02 | TEAD3     |
| ENSG00000136010 | 0.18  | 4.65E-02 | 0.24  | 1.92E-05 | ALDH1L2   |
| ENSG00000110583 | -0.11 | 4.66E-02 | -0.15 | 1.37E-06 | NAA40     |
| ENSG00000139291 | -0.14 | 4.66E-02 | -0.12 | 3.18E-02 | TMEM19    |
| ENSG00000107262 | -0.16 | 4.67E-02 | -0.10 | 5.30E-02 | BAG1      |
| ENSG00000174177 | -0.15 | 4.67E-02 | -0.16 | 9.06E-03 | CTU2      |

|                 |       |          |       |          |           |
|-----------------|-------|----------|-------|----------|-----------|
| ENSG00000175782 | -0.14 | 4.67E-02 | -0.09 | 4.32E-02 | SLC35E3   |
| ENSG00000184445 | -0.12 | 4.67E-02 | 0.15  | 5.73E-03 | KNTC1     |
| ENSG00000196668 | 0.28  | 4.71E-02 | 0.35  | 2.02E-03 | LINC00173 |
| ENSG00000071655 | -0.17 | 4.72E-02 | -0.15 | 5.32E-02 | MBD3      |
| ENSG00000141504 | -0.17 | 4.74E-02 | -0.13 | 4.77E-02 | SAT2      |
| ENSG00000196449 | -0.14 | 4.84E-02 | -0.10 | 9.45E-02 | YRDC      |
| ENSG00000163884 | 0.23  | 4.84E-02 | 0.46  | 9.26E-06 | KLF15     |
| ENSG00000148814 | -0.10 | 4.88E-02 | -0.08 | 4.86E-02 | LRRC27    |
| ENSG00000101132 | -0.21 | 4.96E-02 | -0.15 | 3.48E-02 | PFDN4     |
| ENSG00000120519 | 0.13  | 4.98E-02 | 0.10  | 2.62E-02 | SLC10A7   |
| ENSG00000149573 | 0.61  | 4.99E-02 | 1.11  | 1.46E-05 | MPZL2     |
| ENSG00000215066 | 0.27  | 4.99E-02 | 0.22  | 2.32E-02 | NA        |
| ENSG00000100479 | 0.22  | 5.01E-02 | 0.22  | 4.33E-02 | POLE2     |
| ENSG00000214087 | -0.15 | 5.01E-02 | -0.12 | 4.78E-02 | ARL16     |
| ENSG00000165030 | 0.29  | 5.03E-02 | 0.28  | 1.63E-02 | NFIL3     |
| ENSG00000120693 | 0.18  | 5.04E-02 | 0.20  | 1.43E-02 | SMAD9     |
| ENSG00000253636 | 0.32  | 5.04E-02 | 0.18  | 2.07E-02 |           |
| ENSG00000270061 | 0.23  | 5.04E-02 | 0.17  | 8.48E-02 |           |
| ENSG00000138678 | -0.21 | 5.04E-02 | -0.34 | 8.84E-03 | GPAT3     |
| ENSG00000172380 | 0.20  | 5.05E-02 | 0.29  | 9.85E-05 | GNG12     |
| ENSG00000179431 | -0.22 | 5.05E-02 | -0.22 | 2.50E-02 | FJX1      |
| ENSG00000112964 | 0.16  | 5.06E-02 | 0.17  | 4.61E-02 | GHR       |
| ENSG00000169599 | -0.19 | 5.07E-02 | -0.14 | 3.31E-02 | NFU1      |
| ENSG00000176101 | -0.17 | 5.07E-02 | -0.16 | 2.82E-02 | SSNA1     |
| ENSG00000130307 | -0.25 | 5.08E-02 | -0.28 | 3.04E-02 | USHBP1    |
| ENSG00000102981 | -0.18 | 5.10E-02 | -0.16 | 5.22E-02 | PARD6A    |
| ENSG00000063176 | -0.16 | 5.12E-02 | -0.16 | 3.78E-02 | SPHK2     |
| ENSG00000188868 | -0.15 | 5.12E-02 | 0.14  | 4.80E-02 | ZNF563    |
| ENSG00000124160 | 0.19  | 5.16E-02 | -0.12 | 6.41E-02 | NCOA5     |
| ENSG00000119403 | 0.18  | 5.22E-02 | 0.18  | 7.89E-03 | PHF19     |
| ENSG00000168874 | 0.31  | 5.24E-02 | 0.22  | 4.49E-02 | ATOH8     |
| ENSG00000196456 | -0.11 | 5.24E-02 | -0.10 | 2.64E-02 | ZNF775    |
| ENSG00000204603 | -0.39 | 5.24E-02 | -0.60 | 1.33E-04 | LINC01257 |
| ENSG00000135070 | -0.16 | 5.24E-02 | -0.11 | 9.91E-02 | ISCA1     |
| ENSG00000072954 | -0.16 | 5.30E-02 | -0.20 | 2.47E-05 | TMEM38A   |
| ENSG00000019991 | 0.34  | 5.32E-02 | 0.38  | 8.33E-03 | HGF       |
| ENSG00000183250 | -0.22 | 5.32E-02 | -0.22 | 1.88E-02 | LINC01547 |
| ENSG00000179841 | -0.20 | 5.36E-02 | -0.16 | 2.62E-02 | AKAP5     |
| ENSG00000244556 | 0.26  | 5.36E-02 | 0.16  | 5.12E-02 | ODCP      |



|                 |       |          |       |          |           |
|-----------------|-------|----------|-------|----------|-----------|
| ENSG00000136141 | 0.13  | 5.38E-02 | 0.07  | 6.04E-02 | LRCH1     |
| ENSG00000101180 | 0.22  | 5.46E-02 | 0.17  | 4.61E-02 | HRH3      |
| ENSG00000165076 | 0.36  | 5.46E-02 | 0.51  | 8.94E-05 | PRSS37    |
| ENSG00000091831 | 0.29  | 5.59E-02 | 0.20  | 8.33E-03 | ESR1      |
| ENSG00000157593 | -0.16 | 5.63E-02 | -0.19 | 8.55E-04 | SLC35B2   |
| ENSG00000273081 | -0.15 | 5.63E-02 | -0.14 | 8.68E-02 | NA        |
| ENSG00000130224 | 0.08  | 5.65E-02 | 0.11  | 3.78E-02 | LRCH2     |
| ENSG00000109016 | -0.16 | 5.65E-02 | -0.14 | 1.45E-02 | DHRS7B    |
| ENSG00000129990 | -0.16 | 5.69E-02 | -0.28 | 4.59E-07 | SYT5      |
| ENSG00000183828 | -0.21 | 5.69E-02 | -0.26 | 6.15E-04 | NUDT14    |
| ENSG00000127947 | 0.12  | 5.71E-02 | 0.14  | 3.75E-04 | PTPN12    |
| ENSG00000189238 | -0.33 | 5.71E-02 | -0.36 | 9.52E-03 | LINC00943 |
| ENSG00000107623 | 0.23  | 5.74E-02 | 0.45  | 1.46E-05 | NA        |
| ENSG00000249767 | 0.28  | 5.74E-02 | 0.21  | 4.23E-02 | ENPP7P10  |
| ENSG00000162910 | -0.19 | 5.76E-02 | -0.15 | 9.13E-02 | MRPL55    |
| ENSG00000159674 | -0.31 | 5.77E-02 | -0.24 | 1.66E-02 | SPON2     |
| ENSG00000179833 | 0.20  | 5.79E-02 | 0.13  | 2.74E-02 | SERTAD2   |
| ENSG00000118520 | 0.32  | 5.81E-02 | 0.36  | 1.88E-02 | ARG1      |
| ENSG00000136950 | -0.18 | 5.83E-02 | -0.14 | 2.42E-02 | ARPC5L    |
| ENSG00000112425 | -0.15 | 5.83E-02 | -0.12 | 6.81E-03 | EPM2A     |
| ENSG00000243051 | 0.30  | 5.86E-02 | 0.23  | 5.96E-02 | RN7SL269P |
| ENSG00000107833 | -0.24 | 5.87E-02 | -0.17 | 4.24E-02 | NPM3      |
| ENSG00000168291 | -0.18 | 5.89E-02 | -0.15 | 1.01E-02 | PDHB      |
| ENSG00000121904 | 0.20  | 5.96E-02 | 0.11  | 6.35E-02 | CSMD2     |
| ENSG00000198915 | -0.12 | 6.00E-02 | -0.09 | 7.20E-02 | RASGEF1A  |
| ENSG00000147454 | 0.17  | 6.04E-02 | 0.11  | 8.59E-02 | SLC25A37  |
| ENSG00000157734 | -0.23 | 6.04E-02 | -0.23 | 1.38E-03 | SNX22     |
| ENSG00000165782 | -0.12 | 6.04E-02 | -0.13 | 2.38E-03 | PIP4P1    |
| ENSG00000237720 | -0.19 | 6.04E-02 | -0.29 | 5.59E-05 |           |
| ENSG00000158234 | -0.14 | 6.10E-02 | -0.15 | 3.76E-02 | FAIM      |
| ENSG00000147684 | -0.19 | 6.13E-02 | -0.23 | 1.20E-04 | NDUFB9    |
| ENSG00000167550 | -0.25 | 6.13E-02 | -0.26 | 1.51E-02 | RHEBL1    |
| ENSG00000167588 | -0.27 | 6.20E-02 | -0.59 | 5.56E-07 | GPD1      |
| ENSG00000124508 | 0.26  | 6.24E-02 | 0.35  | 2.95E-02 | BTN2A2    |
| ENSG00000142530 | -0.23 | 6.24E-02 | -0.31 | 3.02E-03 | FAM71E1   |
| ENSG00000120798 | -0.09 | 6.26E-02 | 0.08  | 3.58E-02 | NR2C1     |
| ENSG00000180332 | -0.18 | 6.31E-02 | -0.37 | 3.77E-03 | KCTD4     |
| ENSG00000114383 | -0.16 | 6.32E-02 | -0.12 | 9.57E-03 | TUSC2     |
| ENSG00000117500 | 0.17  | 6.35E-02 | 0.16  | 1.88E-03 | TMED5     |

|                 |       |          |       |          |           |
|-----------------|-------|----------|-------|----------|-----------|
| ENSG00000178860 | -0.29 | 6.35E-02 | -0.30 | 5.75E-02 | MSC       |
| ENSG00000248508 | 0.21  | 6.35E-02 | 0.18  | 9.93E-02 | SRP14-AS1 |
| ENSG00000163528 | -0.14 | 6.43E-02 | -0.12 | 7.27E-02 | CHCHD4    |
| ENSG00000161326 | -0.18 | 6.43E-02 | -0.22 | 1.35E-03 | NA        |
| ENSG00000010438 | -0.23 | 6.47E-02 | -0.19 | 8.54E-02 | PRSS3     |
| ENSG00000167112 | -0.16 | 6.53E-02 | -0.11 | 2.96E-02 | TRUB2     |
| ENSG00000205885 | 0.28  | 6.56E-02 | 0.19  | 1.16E-02 | C1RL-AS1  |
| ENSG00000170075 | -0.20 | 6.57E-02 | -0.18 | 4.61E-02 | GPR37L1   |
| ENSG00000147679 | -0.11 | 6.60E-02 | 0.08  | 1.11E-02 | UTP23     |
| ENSG00000089693 | -0.15 | 6.61E-02 | -0.12 | 6.23E-02 | MLF2      |
| ENSG00000145246 | 0.12  | 6.61E-02 | 0.14  | 9.26E-03 | ATP10D    |
| ENSG00000255471 | 0.20  | 6.68E-02 | 0.21  | 1.67E-02 |           |
| ENSG00000175806 | -0.11 | 6.68E-02 | -0.07 | 7.27E-02 | MSRA      |
| ENSG00000109762 | -0.12 | 6.69E-02 | -0.13 | 2.98E-03 | SNX25     |
| ENSG00000100629 | 0.15  | 6.69E-02 | 0.11  | 5.88E-02 | CEP128    |
| ENSG00000006128 | -0.39 | 6.75E-02 | -0.46 | 4.39E-04 | TAC1      |
| ENSG00000135469 | -0.15 | 6.84E-02 | -0.12 | 8.48E-02 | COQ10A    |
| ENSG00000170379 | 0.31  | 6.84E-02 | 0.42  | 2.37E-04 | TCAF2     |
| ENSG00000233559 | 0.28  | 6.85E-02 | 0.14  | 6.43E-02 | LINC00513 |
| ENSG00000197982 | -0.24 | 6.86E-02 | -0.14 | 7.55E-02 | C1orf122  |
| ENSG00000129103 | -0.14 | 6.87E-02 | -0.13 | 3.26E-02 | SUMF2     |
| ENSG00000163449 | -0.15 | 6.87E-02 | -0.21 | 1.62E-04 | TMEM169   |
| ENSG00000265313 | -0.26 | 6.87E-02 | -0.26 | 1.90E-02 | LINC01476 |
| ENSG00000054803 | -0.25 | 6.87E-02 | -0.15 | 4.64E-02 | CBLN4     |
| ENSG00000144550 | -0.18 | 6.87E-02 | -0.31 | 3.54E-04 | CPNE9     |
| ENSG00000159199 | -0.21 | 6.89E-02 | -0.21 | 7.98E-02 | ATP5MC1   |
| ENSG00000145354 | -0.16 | 6.90E-02 | -0.12 | 4.86E-02 | CISD2     |
| ENSG00000249307 | 0.39  | 6.90E-02 | 0.45  | 4.25E-02 | LINC01088 |
| ENSG00000116096 | 0.23  | 6.92E-02 | 0.20  | 6.58E-02 | SPR       |
| ENSG00000148498 | 0.17  | 6.93E-02 | 0.25  | 2.48E-04 | PARD3     |
| ENSG00000154330 | -0.21 | 6.93E-02 | -0.36 | 2.84E-03 | PGM5      |
| ENSG00000178127 | 0.15  | 6.93E-02 | 0.12  | 7.59E-02 | NDUFV2    |
| ENSG00000185420 | -0.09 | 6.95E-02 | 0.09  | 3.49E-02 | SMYD3     |
| ENSG00000169900 | -0.34 | 7.05E-02 | 0.47  | 1.20E-02 | PYDC1     |
| ENSG00000153094 | 0.15  | 7.07E-02 | 0.18  | 1.24E-03 | BCL2L11   |
| ENSG00000129480 | -0.16 | 7.08E-02 | -0.12 | 3.15E-02 | DTD2      |
| ENSG00000188559 | 0.13  | 7.09E-02 | 0.08  | 7.74E-02 | RALGAPA2  |
| ENSG00000145832 | -0.25 | 7.10E-02 | 0.33  | 1.29E-02 | SLC25A48  |
| ENSG00000088727 | -0.14 | 7.14E-02 | -0.12 | 2.97E-02 | KIF9      |

|                 |       |          |       |          |           |
|-----------------|-------|----------|-------|----------|-----------|
| ENSG00000047662 | 0.17  | 7.15E-02 | 0.19  | 2.23E-02 | FAM184B   |
| ENSG00000069206 | 0.39  | 7.15E-02 | 0.35  | 5.29E-03 | ADAM7     |
| ENSG00000083223 | 0.10  | 7.15E-02 | 0.08  | 4.18E-02 | ZCCHC6    |
| ENSG00000137806 | -0.16 | 7.15E-02 | -0.14 | 5.88E-02 | NDUFAF1   |
| ENSG00000006194 | -0.10 | 7.16E-02 | -0.08 | 6.38E-02 | ZNF263    |
| ENSG00000186017 | -0.09 | 7.16E-02 | 0.07  | 9.79E-03 | ZNF566    |
| ENSG00000169313 | -0.35 | 7.16E-02 | -0.53 | 4.54E-03 | P2RY12    |
| ENSG00000197380 | -0.15 | 7.16E-02 | -0.09 | 9.93E-02 | DACT3     |
| ENSG00000237719 | 0.28  | 7.16E-02 | 0.21  | 5.81E-02 |           |
| ENSG00000171574 | -0.12 | 7.25E-02 | -0.10 | 6.44E-02 | ZNF584    |
| ENSG00000253882 | 0.33  | 7.28E-02 | 0.42  | 1.77E-03 |           |
| ENSG00000162614 | 0.24  | 7.31E-02 | 0.32  | 4.91E-03 | NEXN      |
| ENSG00000010256 | -0.16 | 7.31E-02 | -0.16 | 5.33E-03 | UQCRC1    |
| ENSG00000239002 | -0.55 | 7.33E-02 | -0.30 | 7.21E-02 | SCARNA10  |
| ENSG00000171817 | -0.12 | 7.35E-02 | 0.09  | 2.49E-02 | ZNF540    |
| ENSG00000039650 | -0.13 | 7.37E-02 | -0.20 | 2.08E-03 | PNKP      |
| ENSG00000067955 | 0.19  | 7.37E-02 | 0.17  | 1.59E-02 | CBFB      |
| ENSG00000110013 | -0.11 | 7.37E-02 | -0.09 | 9.50E-02 | SIAE      |
| ENSG00000147155 | -0.17 | 7.48E-02 | -0.25 | 1.57E-03 | EBP       |
| ENSG00000235314 | -0.18 | 7.48E-02 | -0.14 | 8.67E-02 | LINC00957 |
| ENSG00000115137 | -0.12 | 7.51E-02 | -0.09 | 1.46E-02 | DNAJC27   |
| ENSG00000235478 | -0.25 | 7.51E-02 | -0.24 | 5.49E-03 | LINC01664 |
| ENSG00000130749 | 0.14  | 7.51E-02 | -0.09 | 8.78E-02 | ZC3H4     |
| ENSG00000146469 | -0.31 | 7.52E-02 | -0.28 | 9.72E-03 | VIP       |
| ENSG00000198890 | -0.13 | 7.52E-02 | -0.10 | 9.46E-02 | PRMT6     |
| ENSG00000122574 | 0.22  | 7.56E-02 | 0.38  | 9.96E-09 | WIPF3     |
| ENSG00000168936 | -0.17 | 7.56E-02 | -0.14 | 5.05E-02 | TMEM129   |
| ENSG00000092531 | 0.17  | 7.61E-02 | 0.13  | 5.76E-02 | SNAP23    |
| ENSG00000139117 | 0.11  | 7.61E-02 | 0.17  | 1.90E-03 | CPNE8     |
| ENSG00000141098 | -0.12 | 7.61E-02 | -0.16 | 5.76E-05 | GFOD2     |
| ENSG00000204237 | -0.15 | 7.61E-02 | -0.14 | 6.23E-02 | OXLD1     |
| ENSG00000248228 | 0.34  | 7.61E-02 | 0.32  | 1.38E-03 | SLIT2-IT1 |
| ENSG00000169118 | 0.09  | 7.65E-02 | 0.08  | 3.12E-02 | CSNK1G1   |
| ENSG00000177054 | -0.08 | 7.69E-02 | 0.15  | 3.67E-03 | ZDHHC13   |
| ENSG00000225205 | 0.22  | 7.71E-02 | 0.21  | 6.80E-02 |           |
| ENSG00000136052 | -0.07 | 7.72E-02 | 0.08  | 3.04E-02 | SLC41A2   |
| ENSG00000139714 | -0.22 | 7.73E-02 | -0.24 | 5.18E-03 | MORN3     |
| ENSG00000086717 | -0.30 | 7.73E-02 | -0.28 | 9.56E-03 | PPEF1     |
| ENSG00000204131 | 0.21  | 7.79E-02 | 0.16  | 8.82E-02 | NHSL2     |

|                 |       |          |       |          |          |
|-----------------|-------|----------|-------|----------|----------|
| ENSG00000158220 | 0.16  | 7.83E-02 | 0.25  | 1.36E-05 | ESYT3    |
| ENSG00000164292 | 0.18  | 7.84E-02 | 0.38  | 9.84E-08 | RHOBTB3  |
| ENSG00000101940 | -0.13 | 7.89E-02 | -0.15 | 1.60E-02 | WDR13    |
| ENSG00000237684 | 0.38  | 7.90E-02 | 0.38  | 5.95E-02 | RPSAP35  |
| ENSG00000246082 | 0.23  | 7.90E-02 | 0.40  | 1.23E-05 | NUDT16P1 |
| ENSG00000135605 | 0.25  | 7.98E-02 | 0.63  | 9.96E-09 | TEC      |
| ENSG00000139637 | -0.13 | 7.98E-02 | -0.11 | 6.33E-02 | C12orf10 |
| ENSG00000272121 | -0.25 | 8.01E-02 | -0.24 | 7.49E-02 |          |
| ENSG00000117533 | -0.11 | 8.03E-02 | 0.09  | 2.78E-02 | VAMP4    |
| ENSG00000143199 | 0.25  | 8.04E-02 | 0.24  | 2.95E-02 | ADCY10   |
| ENSG00000130511 | -0.18 | 8.05E-02 | -0.27 | 8.81E-04 | SSBP4    |
| ENSG00000074695 | 0.10  | 8.09E-02 | 0.15  | 2.01E-04 | LMAN1    |
| ENSG00000106537 | -0.16 | 8.10E-02 | -0.12 | 4.18E-02 | TSPAN13  |
| ENSG00000138622 | 0.22  | 8.13E-02 | 0.31  | 2.22E-03 | HCN4     |
| ENSG00000214872 | 0.25  | 8.13E-02 | 0.39  | 4.21E-03 | SMTNL1   |
| ENSG00000260912 | 0.22  | 8.15E-02 | 0.24  | 2.07E-02 |          |
| ENSG00000116661 | -0.16 | 8.33E-02 | -0.16 | 1.18E-02 | FBXO2    |
| ENSG00000127362 | 0.25  | 8.34E-02 | 0.33  | 2.39E-05 | TAS2R3   |
| ENSG00000114054 | -0.11 | 8.35E-02 | -0.08 | 9.99E-02 | PCCB     |
| ENSG00000159023 | 0.14  | 8.40E-02 | 0.13  | 8.90E-02 | EPB41    |
| ENSG00000261087 | 0.21  | 8.42E-02 | 0.16  | 2.24E-02 |          |
| ENSG00000106080 | 0.11  | 8.42E-02 | 0.16  | 1.02E-02 | FKBP14   |
| ENSG00000095464 | 0.23  | 8.42E-02 | 0.28  | 1.91E-03 | PDE6C    |
| ENSG00000197321 | 0.15  | 8.43E-02 | 0.15  | 6.58E-02 | SVIL     |
| ENSG00000120437 | -0.20 | 8.44E-02 | -0.29 | 8.47E-04 | ACAT2    |
| ENSG00000182324 | -0.27 | 8.45E-02 | -0.35 | 4.47E-03 | KCNJ14   |
| ENSG00000165973 | -0.17 | 8.46E-02 | -0.20 | 9.79E-03 | NELL1    |
| ENSG00000197992 | -0.42 | 8.48E-02 | -0.66 | 9.25E-03 | CLEC9A   |
| ENSG00000180902 | -0.16 | 8.49E-02 | -0.24 | 6.92E-05 | D2HGDH   |
| ENSG00000186063 | 0.11  | 8.51E-02 | 0.15  | 7.00E-05 | AIDA     |
| ENSG00000152944 | -0.10 | 8.54E-02 | 0.15  | 1.23E-03 | MED21    |
| ENSG00000179397 | -0.14 | 8.57E-02 | 0.11  | 6.21E-02 | CATSPERE |
| ENSG00000198732 | 0.20  | 8.58E-02 | 0.19  | 6.69E-02 | SMOC1    |
| ENSG00000144227 | -0.26 | 8.62E-02 | -0.25 | 2.36E-02 | NXPH2    |
| ENSG00000140365 | -0.14 | 8.71E-02 | -0.14 | 9.04E-03 | COMMD4   |
| ENSG00000088766 | -0.11 | 8.72E-02 | 0.12  | 2.63E-03 | CRLS1    |
| ENSG00000071054 | 0.19  | 8.73E-02 | -0.16 | 3.67E-03 | MAP4K4   |
| ENSG00000183780 | -0.12 | 8.79E-02 | -0.07 | 8.36E-02 | SLC35F3  |
| ENSG00000198729 | -0.20 | 8.79E-02 | -0.17 | 3.05E-02 | PPP1R14C |

|                  |       |          |       |          |              |
|------------------|-------|----------|-------|----------|--------------|
| ENSG00000261589  | 0.22  | 8.81E-02 | 0.31  | 2.30E-04 | NA           |
| ENSG00000112237  | -0.11 | 8.82E-02 | 0.11  | 5.20E-03 | CCNC         |
| ENSG00000259619  | 0.34  | 8.82E-02 | 0.27  | 4.07E-02 |              |
| ENSG00000273274  | 0.19  | 8.82E-02 | 0.16  | 2.23E-02 | ZBTB8B       |
| ENSG00000177731  | 0.12  | 8.85E-02 | -0.13 | 1.38E-02 | FLII         |
| ENSG00000173227  | -0.19 | 8.89E-02 | -0.34 | 1.34E-05 | SYT12        |
| ENSG00000135097  | -0.23 | 8.90E-02 | -0.18 | 4.04E-02 | MSI1         |
| ENSG00000100906  | 0.23  | 8.95E-02 | 0.27  | 5.25E-02 | NFKBIA       |
| ENSG00000175895  | 0.15  | 8.96E-02 | 0.20  | 4.25E-03 | PLEKHF2      |
| ENSG00000173511  | -0.11 | 8.97E-02 | -0.14 | 7.18E-03 | VEGFB        |
| ENSG00000254999  | -0.14 | 8.97E-02 | -0.17 | 5.64E-02 | BRK1         |
| ENSG00000188612  | -0.13 | 8.99E-02 | -0.13 | 8.98E-02 | SUMO2        |
| ENSG00000159860  | 0.32  | 8.99E-02 | 0.44  | 2.15E-03 | TCAF2P1      |
| ENSG00000007062  | -0.18 | 9.08E-02 | -0.37 | 1.69E-05 | PROM1        |
| ENSG00000100652  | 0.26  | 9.10E-02 | 0.44  | 2.33E-03 | SLC10A1      |
| ENSG00000163629  | 0.11  | 9.10E-02 | 0.14  | 3.31E-02 | PTPN13       |
| ENSG00000117410  | -0.20 | 9.12E-02 | -0.20 | 4.49E-02 | ATP6V0B      |
| ENSG00000121210  | 0.14  | 9.15E-02 | 0.13  | 9.71E-03 | TMEM131L     |
| ENSG00000175318  | 0.21  | 9.15E-02 | 0.22  | 4.98E-02 | GRAMD2A      |
| ENSG00000186073  | 0.12  | 9.15E-02 | 0.14  | 1.12E-02 | C15orf41     |
| ENSG000000050130 | -0.09 | 9.18E-02 | -0.08 | 8.11E-02 | JKAMP        |
| ENSG00000196189  | -0.13 | 9.22E-02 | -0.21 | 9.29E-03 | SEMA4A       |
| ENSG00000271971  | 0.18  | 9.22E-02 | 0.19  | 1.59E-02 |              |
| ENSG00000249790  | 0.22  | 9.25E-02 | 0.46  | 8.63E-02 |              |
| ENSG00000139597  | -0.10 | 9.26E-02 | 0.10  | 4.86E-02 | N4BP2L1      |
| ENSG00000119688  | 0.11  | 9.27E-02 | 0.10  | 5.92E-02 | ABCD4        |
| ENSG00000177692  | -0.17 | 9.29E-02 | -0.18 | 4.81E-03 | DNAJC28      |
| ENSG00000104231  | -0.11 | 9.31E-02 | 0.11  | 2.78E-02 | ZFAND1       |
| ENSG00000066382  | -0.10 | 9.32E-02 | -0.11 | 3.50E-03 | MPPED2       |
| ENSG00000152413  | -0.16 | 9.32E-02 | -0.29 | 1.78E-05 | HOMER1       |
| ENSG00000158552  | -0.12 | 9.33E-02 | -0.11 | 4.56E-02 | ZFAND2B      |
| ENSG00000251379  | 0.21  | 9.33E-02 | 0.57  | 5.49E-03 |              |
| ENSG00000171490  | -0.09 | 9.45E-02 | -0.08 | 3.36E-02 | RSL1D1       |
| ENSG00000179294  | -0.23 | 9.50E-02 | -0.42 | 5.96E-06 | NA           |
| ENSG00000101463  | -0.11 | 9.52E-02 | -0.21 | 3.41E-04 | SYNDIG1      |
| ENSG00000124787  | -0.15 | 9.52E-02 | -0.18 | 3.15E-02 | RPP40        |
| ENSG00000165449  | 0.24  | 9.52E-02 | 0.42  | 1.94E-05 | SLC16A9      |
| ENSG00000243715  | 0.27  | 9.55E-02 | 0.36  | 1.23E-05 | CACNA2D3-AS1 |
| ENSG00000228653  | 0.20  | 9.68E-02 | 0.15  | 7.28E-02 | HNRNPCP7     |

|                 |       |          |       |          |            |
|-----------------|-------|----------|-------|----------|------------|
| ENSG00000161912 | 0.14  | 9.74E-02 | 0.12  | 8.27E-02 | ADCY10P1   |
| ENSG00000170955 | -0.26 | 9.75E-02 | -0.39 | 1.25E-02 | CAVIN3     |
| ENSG00000183255 | 0.19  | 9.75E-02 | 0.12  | 2.66E-02 | PTTG1IP    |
| ENSG00000160194 | -0.13 | 9.75E-02 | -0.13 | 4.69E-02 | NDUFV3     |
| ENSG00000226137 | -0.17 | 9.77E-02 | -0.21 | 5.98E-04 | BAIAP2-AS1 |
| ENSG00000269956 | 0.20  | 9.77E-02 | 0.24  | 2.28E-03 | MKNK1-AS1  |
| ENSG00000152229 | 0.35  | 9.92E-02 | 0.50  | 2.09E-02 | PSTPIP2    |
| ENSG00000273472 | -0.23 | 9.94E-02 | -0.26 | 3.09E-02 |            |
| ENSG00000149809 | -0.14 | 9.96E-02 | -0.25 | 2.42E-04 | TM7SF2     |
| ENSG00000181104 | 0.18  | 9.96E-02 | 0.26  | 3.32E-02 | F2R        |
| ENSG00000100023 | 0.09  | 9.96E-02 | -0.07 | 8.42E-02 | PPIL2      |
| ENSG00000152952 | 0.19  | 9.96E-02 | 0.24  | 3.03E-03 | PLOD2      |
| ENSG00000172671 | 0.13  | 1.00E-01 | 0.11  | 8.59E-02 | ZFAND4     |

| Supplementary Table 2: Differentially Expressed Genes in PsychENCODE |                 |          |           |             |
|----------------------------------------------------------------------|-----------------|----------|-----------|-------------|
|                                                                      | log2Fold Change | padj     | Gene      | Sig. in CMC |
| ENSG00000107821                                                      | -2.13           | 4.17E-03 | KAZALD1   | Y           |
| ENSG00000057593                                                      | -1.90           | 1.55E-02 | F7        | Y           |
| ENSG00000114739                                                      | 0.67            | 1.55E-02 | ACVR2B    | Y           |
| ENSG00000162600                                                      | 1.44            | 1.55E-02 | OMA1      | N           |
| ENSG00000185823                                                      | 2.55            | 2.29E-02 | NPAP1     | Y           |
| ENSG00000118503                                                      | -4.14           | 2.78E-02 | TNFAIP3   | N           |
| ENSG00000128039                                                      | 1.11            | 2.78E-02 | SRD5A3    | Y           |
| ENSG00000249348                                                      | 1.23            | 2.78E-02 | UGDH-AS1  | Y           |
| ENSG00000152229                                                      | -4.04           | 3.06E-02 | PSTPIP2   | Y           |
| ENSG00000175832                                                      | -1.60           | 3.66E-02 | ETV4      | N           |
| ENSG00000263477                                                      | 1.37            | 3.69E-02 |           | Y           |
| ENSG00000233421                                                      | -3.36           | 4.21E-02 | LINC01783 | N           |
| ENSG00000144036                                                      | 0.53            | 5.19E-02 | EXOC6B    | N           |
| ENSG00000083290                                                      | 0.47            | 5.28E-02 | ULK2      | N           |
| ENSG00000143442                                                      | 0.55            | 5.28E-02 | POGZ      | Y           |
| ENSG00000145824                                                      | -1.51           | 6.15E-02 | CXCL14    | N           |
| ENSG00000167103                                                      | -1.50           | 6.15E-02 | PIP5KL1   | Y           |
| ENSG00000108375                                                      | -1.64           | 7.27E-02 | RNF43     | N           |
| ENSG00000140386                                                      | 0.49            | 7.56E-02 | SCAPER    | N           |
| ENSG00000250366                                                      | -1.61           | 7.56E-02 | TUNAR     | N           |
| ENSG00000272541                                                      | 1.34            | 7.56E-02 |           | N           |
| ENSG00000186162                                                      | -0.77           | 8.36E-02 | CIDECP    | Y           |
| ENSG00000107165                                                      | 1.78            | 8.56E-02 | TYRP1     | Y           |
| ENSG00000140511                                                      | -3.04           | 8.56E-02 | HAPLN3    | N           |
| ENSG00000130208                                                      | -2.34           | 8.62E-02 | APOC1     | N           |
| ENSG00000185104                                                      | 0.40            | 8.62E-02 | FAF1      | Y           |
| ENSG00000253161                                                      | -2.08           | 8.62E-02 | LINC01605 | N           |
| ENSG00000127423                                                      | -1.17           | 9.24E-02 | AUNIP     | Y           |
| ENSG00000080573                                                      | -1.53           | 9.41E-02 | COL5A3    | Y           |

Supplementary Table 3: Gene Set Enrichment Analysis of Differentially Expressed Genes in CommonMind

| Category        | Term                                          | Gene Count | Fold Enrichment | Bonferroni |
|-----------------|-----------------------------------------------|------------|-----------------|------------|
| SP_PIR_KEYWORDS | acetylation                                   | 1070       | 1.50            | 4.75E-57   |
| SP_PIR_KEYWORDS | phosphoprotein                                | 2375       | 1.21            | 3.55E-40   |
| GOTERM_CC_FAT   | GO:0005739~mitochondrion                      | 458        | 1.58            | 6.12E-28   |
| GOTERM_CC_FAT   | GO:0030529~ribonucleoprotein complex          | 250        | 1.82            | 3.61E-24   |
| SP_PIR_KEYWORDS | mitochondrion                                 | 359        | 1.60            | 9.83E-22   |
| SP_PIR_KEYWORDS | alternative splicing                          | 2325       | 1.15            | 4.17E-21   |
| GOTERM_CC_FAT   | GO:0070013~intracellular organelle lumen      | 647        | 1.36            | 1.38E-19   |
| GOTERM_CC_FAT   | GO:0044429~mitochondrial part                 | 266        | 1.67            | 3.02E-19   |
| GOTERM_CC_FAT   | GO:0005840~ribosome                           | 125        | 2.18            | 3.11E-19   |
| SP_PIR_KEYWORDS | ribonucleoprotein                             | 152        | 2.01            | 3.53E-19   |
| GOTERM_CC_FAT   | GO:0031974~membrane-enclosed lumen            | 668        | 1.35            | 4.84E-19   |
| UP_SEQ_FEATURE  | splice variant                                | 2319       | 1.14            | 7.64E-19   |
| GOTERM_CC_FAT   | GO:0043233~organelle lumen                    | 653        | 1.34            | 3.91E-18   |
| SP_PIR_KEYWORDS | ribosomal protein                             | 112        | 2.20            | 1.38E-17   |
| GOTERM_BP_FAT   | GO:0006412~translation                        | 172        | 1.89            | 1.67E-17   |
| SP_PIR_KEYWORDS | transit peptide                               | 217        | 1.69            | 1.43E-15   |
| SP_PIR_KEYWORDS | nucleus                                       | 1381       | 1.19            | 1.58E-15   |
| GOTERM_CC_FAT   | GO:0031090~organelle membrane                 | 414        | 1.41            | 1.93E-14   |
| GOTERM_CC_FAT   | GO:0031981~nuclear lumen                      | 523        | 1.35            | 2.52E-14   |
| UP_SEQ_FEATURE  | transit peptide:Mitochondrion                 | 213        | 1.68            | 6.29E-14   |
| KEGG_PATHWAY    | hsa05012:Parkinson's disease                  | 79         | 2.27            | 1.07E-13   |
| GOTERM_CC_FAT   | GO:0005829~cytosol                            | 485        | 1.37            | 1.84E-13   |
| GOTERM_CC_FAT   | GO:0033279~ribosomal subunit                  | 79         | 2.31            | 2.76E-13   |
| GOTERM_CC_FAT   | GO:0019866~organelle inner membrane           | 156        | 1.78            | 6.45E-13   |
| GOTERM_MF_FAT   | GO:0003735~structural constituent of ribosome | 97         | 2.11            | 6.48E-13   |
| KEGG_PATHWAY    | hsa05016:Huntington's disease                 | 99         | 2.02            | 6.61E-13   |
| GOTERM_CC_FAT   | GO:0005740~mitochondrial envelope             | 185        | 1.65            | 7.19E-12   |
| GOTERM_CC_FAT   | GO:0005743~mitochondrial inner membrane       | 145        | 1.77            | 7.92E-12   |



|                 |                                                                         |      |      |          |
|-----------------|-------------------------------------------------------------------------|------|------|----------|
| SP_PIR_KEYWORDS | cytoplasm                                                               | 1080 | 1.20 | 2.44E-11 |
| SP_PIR_KEYWORDS | respiratory chain                                                       | 51   | 2.66 | 2.50E-11 |
| GOTERM_CC_FAT   | GO:0031966~mitochondrial membrane                                       | 174  | 1.65 | 4.75E-11 |
| SP_PIR_KEYWORDS | mitochondrion inner membrane                                            | 102  | 1.95 | 5.70E-11 |
| GOTERM_CC_FAT   | GO:0031975~envelope                                                     | 248  | 1.49 | 2.54E-10 |
| GOTERM_CC_FAT   | GO:0031967~organelle envelope                                           | 247  | 1.49 | 3.16E-10 |
| KEGG_PATHWAY    | hsa00190:Oxidative phosphorylation                                      | 74   | 2.09 | 3.27E-10 |
| GOTERM_MF_FAT   | GO:0000166~nucleotide binding                                           | 755  | 1.23 | 9.98E-10 |
| SP_PIR_KEYWORDS | zinc-finger                                                             | 591  | 1.27 | 1.34E-09 |
| SP_PIR_KEYWORDS | protein biosynthesis                                                    | 97   | 1.91 | 1.58E-09 |
| KEGG_PATHWAY    | hsa05010:Alzheimer's disease                                            | 85   | 1.92 | 3.44E-09 |
| GOTERM_BP_FAT   | GO:0044265~cellular macromolecule catabolic process                     | 286  | 1.43 | 5.59E-09 |
| KEGG_PATHWAY    | hsa03010:Ribosome                                                       | 54   | 2.28 | 5.81E-09 |
| GOTERM_BP_FAT   | GO:0051603~proteolysis involved in cellular protein catabolic process   | 243  | 1.47 | 1.44E-08 |
| GOTERM_BP_FAT   | GO:0044257~cellular protein catabolic process                           | 243  | 1.46 | 2.66E-08 |
| GOTERM_BP_FAT   | GO:0070647~protein modification by small protein conjugation or removal | 86   | 1.95 | 2.90E-08 |
| GOTERM_CC_FAT   | GO:0005654~nucleoplasm                                                  | 322  | 1.37 | 2.97E-08 |
| GOTERM_BP_FAT   | GO:0030163~protein catabolic process                                    | 249  | 1.45 | 3.20E-08 |
| GOTERM_CC_FAT   | GO:0044455~mitochondrial membrane part                                  | 69   | 2.07 | 3.54E-08 |
| GOTERM_BP_FAT   | GO:0009057~macromolecule catabolic process                              | 300  | 1.39 | 5.85E-08 |
| GOTERM_CC_FAT   | GO:0043228~non-membrane-bounded organelle                               | 825  | 1.19 | 6.46E-08 |
| GOTERM_CC_FAT   | GO:0043232~intracellular non-membrane-bounded organelle                 | 825  | 1.19 | 6.46E-08 |
| SP_PIR_KEYWORDS | metal-binding                                                           | 948  | 1.18 | 9.35E-08 |
| GOTERM_CC_FAT   | GO:0070469~respiratory chain                                            | 47   | 2.35 | 2.41E-07 |

|                 |                                                                   |     |      |          |
|-----------------|-------------------------------------------------------------------|-----|------|----------|
| GOTERM_BP_FAT   | GO:0006414~translational elongation                               | 60  | 2.16 | 3.27E-07 |
| GOTERM_BP_FAT   | GO:0043632~modification-dependent macromolecule catabolic process | 229 | 1.45 | 3.61E-07 |
| GOTERM_BP_FAT   | GO:0019941~modification-dependent protein catabolic process       | 229 | 1.45 | 3.61E-07 |
| GOTERM_CC_FAT   | GO:0022626~cytosolic ribosome                                     | 49  | 2.27 | 5.34E-07 |
| GOTERM_MF_FAT   | GO:0003723~RNA binding                                            | 272 | 1.38 | 5.92E-07 |
| SP_PIR_KEYWORDS | protein transport                                                 | 193 | 1.47 | 6.97E-07 |
| GOTERM_CC_FAT   | GO:0000313~organellar ribosome                                    | 34  | 2.65 | 1.11E-06 |
| GOTERM_CC_FAT   | GO:0005761~mitochondrial ribosome                                 | 34  | 2.65 | 1.11E-06 |
| SP_PIR_KEYWORDS | zinc                                                              | 711 | 1.20 | 1.32E-06 |
| SP_PIR_KEYWORDS | ubl conjugation pathway                                           | 199 | 1.45 | 2.06E-06 |
| SP_PIR_KEYWORDS | nucleotide-binding                                                | 561 | 1.23 | 2.11E-06 |
| GOTERM_BP_FAT   | GO:0006396~RNA processing                                         | 217 | 1.44 | 2.19E-06 |
| GOTERM_CC_FAT   | GO:0015934~large ribosomal subunit                                | 42  | 2.35 | 2.46E-06 |
| SP_PIR_KEYWORDS | ligase                                                            | 130 | 1.58 | 4.14E-06 |
| KEGG_PATHWAY    | hsa04120:Ubiquitin mediated proteolysis                           | 68  | 1.82 | 6.36E-06 |
| SP_PIR_KEYWORDS | rna-binding                                                       | 207 | 1.42 | 6.37E-06 |
| GOTERM_CC_FAT   | GO:0005746~mitochondrial respiratory chain                        | 40  | 2.34 | 7.07E-06 |
| SP_PIR_KEYWORDS | ribosome                                                          | 44  | 2.23 | 8.44E-06 |
| SP_PIR_KEYWORDS | atp-binding                                                       | 448 | 1.25 | 1.36E-05 |
| GOTERM_BP_FAT   | GO:0015031~protein transport                                      | 283 | 1.35 | 1.43E-05 |
| GOTERM_CC_FAT   | GO:0031980~mitochondrial lumen                                    | 100 | 1.65 | 1.83E-05 |
| GOTERM_CC_FAT   | GO:0005759~mitochondrial matrix                                   | 100 | 1.65 | 1.83E-05 |
| GOTERM_MF_FAT   | GO:0032555~purine ribonucleotide binding                          | 605 | 1.20 | 1.84E-05 |
| GOTERM_MF_FAT   | GO:0032553~ribonucleotide binding                                 | 605 | 1.20 | 1.84E-05 |
| GOTERM_BP_FAT   | GO:0045184~establishment of protein localization                  | 284 | 1.34 | 2.49E-05 |

|                 |                                                              |     |      |          |
|-----------------|--------------------------------------------------------------|-----|------|----------|
| GOTERM_MF_FAT   | GO:0017076~purine nucleotide binding                         | 628 | 1.20 | 2.62E-05 |
| GOTERM_MF_FAT   | GO:0019787~small conjugating protein ligase activity         | 80  | 1.76 | 3.60E-05 |
| GOTERM_BP_FAT   | GO:0006119~oxidative phosphorylation                         | 55  | 2.04 | 3.80E-05 |
| GOTERM_BP_FAT   | GO:0008104~protein localization                              | 318 | 1.31 | 5.15E-05 |
| SP_PIR_KEYWORDS | mrna processing                                              | 111 | 1.58 | 5.35E-05 |
| GOTERM_CC_FAT   | GO:0045271~respiratory chain complex I                       | 29  | 2.59 | 5.65E-05 |
| GOTERM_CC_FAT   | GO:0005747~mitochondrial respiratory chain complex I         | 29  | 2.59 | 5.65E-05 |
| GOTERM_CC_FAT   | GO:0030964~NADH dehydrogenase complex                        | 29  | 2.59 | 5.65E-05 |
| GOTERM_BP_FAT   | GO:0032446~protein modification by small protein conjugation | 68  | 1.87 | 5.82E-05 |
| UP_SEQ_FEATURE  | mutagenesis site                                             | 667 | 1.20 | 6.73E-05 |
| GOTERM_MF_FAT   | GO:0008270~zinc ion binding                                  | 740 | 1.17 | 6.73E-05 |
| GOTERM_CC_FAT   | GO:0015935~small ribosomal subunit                           | 38  | 2.26 | 6.75E-05 |
| GOTERM_CC_FAT   | GO:0044445~cytosolic part                                    | 72  | 1.77 | 6.89E-05 |
| GOTERM_MF_FAT   | GO:0008137~NADH dehydrogenase (ubiquinone) activity          | 30  | 2.55 | 9.48E-05 |
| GOTERM_MF_FAT   | GO:0050136~NADH dehydrogenase (quinone) activity             | 30  | 2.55 | 9.48E-05 |
| GOTERM_MF_FAT   | GO:0003954~NADH dehydrogenase activity                       | 30  | 2.55 | 9.48E-05 |
| GOTERM_MF_FAT   | GO:0016879~ligase activity, forming carbon-nitrogen bonds    | 102 | 1.61 | 1.05E-04 |
| GOTERM_CC_FAT   | GO:0005730~nucleolus                                         | 248 | 1.33 | 1.05E-04 |
| GOTERM_MF_FAT   | GO:0046914~transition metal ion binding                      | 875 | 1.15 | 1.20E-04 |
| SP_PIR_KEYWORDS | transport                                                    | 543 | 1.20 | 1.36E-04 |
| GOTERM_MF_FAT   | GO:0032559~adenyl ribonucleotide binding                     | 498 | 1.22 | 1.42E-04 |
| GOTERM_MF_FAT   | GO:0030554~adenyl nucleotide binding                         | 521 | 1.21 | 1.80E-04 |
| GOTERM_MF_FAT   | GO:0005524~ATP binding                                       | 491 | 1.21 | 1.94E-04 |

|                 |                                                                                                 |      |      |          |
|-----------------|-------------------------------------------------------------------------------------------------|------|------|----------|
| GOTERM_BP_FAT   | GO:0043161~proteasomal ubiquitin-dependent protein catabolic process                            | 55   | 1.96 | 2.40E-04 |
| GOTERM_BP_FAT   | GO:0010498~proteasomal protein catabolic process                                                | 55   | 1.96 | 2.40E-04 |
| SP_PIR_KEYWORDS | electron transport                                                                              | 52   | 1.92 | 2.44E-04 |
| GOTERM_MF_FAT   | GO:0001883~purine nucleoside binding                                                            | 527  | 1.20 | 2.54E-04 |
| GOTERM_MF_FAT   | GO:0001882~nucleoside binding                                                                   | 530  | 1.20 | 2.74E-04 |
| GOTERM_BP_FAT   | GO:0031396~regulation of protein ubiquitination                                                 | 54   | 1.96 | 3.04E-04 |
| GOTERM_MF_FAT   | GO:0016881~acid-amino acid ligase activity                                                      | 90   | 1.64 | 3.20E-04 |
| GOTERM_BP_FAT   | GO:0000398~nuclear mRNA splicing, via spliceosome                                               | 74   | 1.76 | 3.66E-04 |
| GOTERM_BP_FAT   | GO:0000377~RNA splicing, via transesterification reactions with bulged adenosine as nucleophile | 74   | 1.76 | 3.66E-04 |
| GOTERM_BP_FAT   | GO:0000375~RNA splicing, via transesterification reactions                                      | 74   | 1.76 | 3.66E-04 |
| GOTERM_MF_FAT   | GO:0016651~oxidoreductase activity, acting on NADH or NADPH                                     | 46   | 2.02 | 4.02E-04 |
| GOTERM_MF_FAT   | GO:0016887~ATPase activity                                                                      | 135  | 1.48 | 4.31E-04 |
| GOTERM_BP_FAT   | GO:0016071~mRNA metabolic process                                                               | 149  | 1.46 | 4.99E-04 |
| GOTERM_MF_FAT   | GO:0004842~ubiquitin-protein ligase activity                                                    | 70   | 1.74 | 5.45E-04 |
| GOTERM_BP_FAT   | GO:0006120~mitochondrial electron transport, NADH to ubiquinone                                 | 29   | 2.51 | 6.98E-04 |
| GOTERM_BP_FAT   | GO:0006397~mRNA processing                                                                      | 132  | 1.49 | 7.08E-04 |
| GOTERM_BP_FAT   | GO:0045333~cellular respiration                                                                 | 52   | 1.95 | 7.51E-04 |
| GOTERM_MF_FAT   | GO:0046872~metal ion binding                                                                    | 1251 | 1.10 | 9.44E-04 |
| GOTERM_BP_FAT   | GO:0042773~ATP synthesis coupled electron transport                                             | 35   | 2.27 | 9.90E-04 |
| GOTERM_BP_FAT   | GO:0042775~mitochondrial ATP synthesis coupled electron transport                               | 35   | 2.27 | 9.90E-04 |

|                 |                                                                                                      |      |      |          |
|-----------------|------------------------------------------------------------------------------------------------------|------|------|----------|
| GOTERM_MF_FAT   | GO:0016655~oxidoreductase activity, acting on NADH or NADPH, quinone or similar compound as acceptor | 31   | 2.31 | 1.35E-03 |
| GOTERM_MF_FAT   | GO:0043169~cation binding                                                                            | 1260 | 1.10 | 1.38E-03 |
| GOTERM_CC_FAT   | GO:0000151~ubiquitin ligase complex                                                                  | 46   | 1.91 | 1.60E-03 |
| GOTERM_BP_FAT   | GO:0006091~generation of precursor metabolites and energy                                            | 128  | 1.48 | 1.60E-03 |
| GOTERM_BP_FAT   | GO:0022904~respiratory electron transport chain                                                      | 38   | 2.16 | 1.69E-03 |
| GOTERM_BP_FAT   | GO:0016568~chromatin modification                                                                    | 114  | 1.51 | 2.69E-03 |
| GOTERM_MF_FAT   | GO:0043167~ion binding                                                                               | 1274 | 1.10 | 2.83E-03 |
| GOTERM_MF_FAT   | GO:0042623~ATPase activity, coupled                                                                  | 111  | 1.49 | 3.28E-03 |
| KEGG_PATHWAY    | hsa03040:Spliceosome                                                                                 | 57   | 1.66 | 3.58E-03 |
| GOTERM_BP_FAT   | GO:0022613~ribonucleoprotein complex biogenesis                                                      | 81   | 1.63 | 3.72E-03 |
| GOTERM_BP_FAT   | GO:0015980~energy derivation by oxidation of organic compounds                                       | 68   | 1.71 | 3.95E-03 |
| GOTERM_BP_FAT   | GO:0006974~response to DNA damage stimulus                                                           | 146  | 1.42 | 4.86E-03 |
| SP_PIR_KEYWORDS | mrna splicing                                                                                        | 87   | 1.54 | 5.30E-03 |
| GOTERM_CC_FAT   | GO:0000775~chromosome, centromeric region                                                            | 57   | 1.72 | 5.65E-03 |
| SP_PIR_KEYWORDS | cell division                                                                                        | 105  | 1.47 | 6.31E-03 |
| GOTERM_BP_FAT   | GO:0031397~negative regulation of protein ubiquitination                                             | 41   | 2.01 | 6.35E-03 |
| GOTERM_BP_FAT   | GO:0008380~RNA splicing                                                                              | 116  | 1.48 | 6.39E-03 |
| SMART           | SM00355:ZnF_C2H2                                                                                     | 264  | 1.25 | 7.31E-03 |
| SP_PIR_KEYWORDS | oxidative phosphorylation                                                                            | 23   | 2.43 | 7.98E-03 |
| SP_PIR_KEYWORDS | coiled coil                                                                                          | 629  | 1.15 | 8.11E-03 |
| GOTERM_BP_FAT   | GO:0016567~protein ubiquitination                                                                    | 58   | 1.77 | 8.14E-03 |
| GOTERM_CC_FAT   | GO:0000123~histone acetyltransferase complex                                                         | 29   | 2.17 | 9.03E-03 |
| GOTERM_BP_FAT   | GO:0022900~electron transport chain                                                                  | 56   | 1.78 | 9.28E-03 |

|                 |                                                                                                           |     |      |          |
|-----------------|-----------------------------------------------------------------------------------------------------------|-----|------|----------|
| GOTERM_BP_FAT   | GO:0031145~anaphase-promoting complex-dependent proteasomal ubiquitin-dependent protein catabolic process | 37  | 2.07 | 9.94E-03 |
| GOTERM_BP_FAT   | GO:0051443~positive regulation of ubiquitin-protein ligase activity                                       | 39  | 2.02 | 1.01E-02 |
| GOTERM_BP_FAT   | GO:0046907~intracellular transport                                                                        | 235 | 1.30 | 1.03E-02 |
| GOTERM_CC_FAT   | GO:0005681~spliceosome                                                                                    | 59  | 1.67 | 1.09E-02 |
| GOTERM_BP_FAT   | GO:0006281~DNA repair                                                                                     | 115 | 1.47 | 1.17E-02 |
| GOTERM_BP_FAT   | GO:0051438~regulation of ubiquitin-protein ligase activity                                                | 42  | 1.95 | 1.22E-02 |
| GOTERM_BP_FAT   | GO:0051351~positive regulation of ligase activity                                                         | 40  | 1.99 | 1.26E-02 |
| GOTERM_BP_FAT   | GO:0051340~regulation of ligase activity                                                                  | 43  | 1.93 | 1.47E-02 |
| GOTERM_CC_FAT   | GO:0044431~Golgi apparatus part                                                                           | 112 | 1.43 | 1.47E-02 |
| GOTERM_BP_FAT   | GO:0051439~regulation of ubiquitin-protein ligase activity during mitotic cell cycle                      | 39  | 1.99 | 1.60E-02 |
| GOTERM_BP_FAT   | GO:0031398~positive regulation of protein ubiquitination                                                  | 44  | 1.90 | 1.74E-02 |
| GOTERM_CC_FAT   | GO:0044451~nucleoplasm part                                                                               | 191 | 1.29 | 3.05E-02 |
| GOTERM_CC_FAT   | GO:0022627~cytosolic small ribosomal subunit                                                              | 24  | 2.25 | 3.07E-02 |
| GOTERM_BP_FAT   | GO:0016569~covalent chromatin modification                                                                | 59  | 1.70 | 3.17E-02 |
| GOTERM_BP_FAT   | GO:0051436~negative regulation of ubiquitin-protein ligase activity during mitotic cell cycle             | 36  | 2.01 | 3.20E-02 |
| SP_PIR_KEYWORDS | dna repair                                                                                                | 78  | 1.51 | 3.60E-02 |
| GOTERM_CC_FAT   | GO:0022625~cytosolic large ribosomal subunit                                                              | 23  | 2.27 | 3.90E-02 |
| UP_SEQ_FEATURE  | zinc finger region:C2H2-type 9                                                                            | 143 | 1.40 | 3.95E-02 |
| GOTERM_BP_FAT   | GO:0051437~positive regulation of ubiquitin-protein ligase activity during mitotic cell cycle             | 37  | 1.98 | 3.95E-02 |

|                 |                                                                           |     |      |          |
|-----------------|---------------------------------------------------------------------------|-----|------|----------|
| GOTERM_BP_FAT   | GO:0000278~mitotic cell cycle                                             | 141 | 1.38 | 3.96E-02 |
| GOTERM_CC_FAT   | GO:0031903~microbody membrane                                             | 20  | 2.42 | 4.33E-02 |
| GOTERM_CC_FAT   | GO:0005778~peroxisomal membrane                                           | 20  | 2.42 | 4.33E-02 |
| KEGG_PATHWAY    | hsa04260:Cardiac muscle contraction                                       | 37  | 1.74 | 4.34E-02 |
| UP_SEQ_FEATURE  | zinc finger region:C2H2-type 10                                           | 129 | 1.42 | 4.95E-02 |
| GOTERM_MF_FAT   | GO:0015078~hydrogen ion transmembrane transporter activity                | 44  | 1.79 | 5.22E-02 |
| SP_PIR_KEYWORDS | cell cycle                                                                | 163 | 1.31 | 5.43E-02 |
| GOTERM_MF_FAT   | GO:0015077~monovalent inorganic cation transmembrane transporter activity | 49  | 1.72 | 5.73E-02 |
| UP_SEQ_FEATURE  | zinc finger region:C2H2-type 8                                            | 155 | 1.37 | 6.72E-02 |
| GOTERM_BP_FAT   | GO:0006511~ubiquitin-dependent protein catabolic process                  | 98  | 1.47 | 6.73E-02 |
| SP_PIR_KEYWORDS | Spliceosome                                                               | 53  | 1.63 | 6.76E-02 |
| GOTERM_BP_FAT   | GO:0006259~DNA metabolic process                                          | 183 | 1.31 | 7.17E-02 |
| KEGG_PATHWAY    | hsa03050:Proteasome                                                       | 25  | 1.96 | 7.50E-02 |
| GOTERM_BP_FAT   | GO:0051352~negative regulation of ligase activity                         | 36  | 1.95 | 7.58E-02 |
| GOTERM_BP_FAT   | GO:0051444~negative regulation of ubiquitin-protein ligase activity       | 36  | 1.95 | 7.58E-02 |
| SP_PIR_KEYWORDS | mitosis                                                                   | 74  | 1.50 | 8.14E-02 |
| SP_PIR_KEYWORDS | host-virus interaction                                                    | 107 | 1.39 | 8.24E-02 |
| SP_PIR_KEYWORDS | magnesium                                                                 | 156 | 1.31 | 8.52E-02 |
| SMART           | SM00651:Sm                                                                | 13  | 2.88 | 8.72E-02 |
| SP_PIR_KEYWORDS | DNA damage                                                                | 81  | 1.46 | 9.28E-02 |
| GOTERM_CC_FAT   | GO:0015630~microtubule cytoskeleton                                       | 186 | 1.27 | 9.85E-02 |

Supplementary Table 4: Inrich Analysis of Overlap between Differentially Expressed Genes in CMC and 108 GWAS Regions

| Chr  | Position             | Gene                                                          |
|------|----------------------|---------------------------------------------------------------|
| chr1 | 8411211..8638666     | ENSG00000232912                                               |
| chr1 | 44029353..44128047   | KDM4A                                                         |
| chr1 | 97792597..98559093   | DPYD-IT1,DPYD-AS2,ENSG00000259946                             |
| chr1 | 149998923..150242595 | VPS45                                                         |
| chr1 | 177247854..177300809 | BRINP2                                                        |
| chr1 | 207912179..208024062 | MIR29B2CHG                                                    |
| chr1 | 243503764..244002773 | SDCCAG8,AKT3,FABP7P1,AKT3-IT1,ENSG00000232184,ENSG00000236031 |
| chr2 | 72357336..72368190   | CYP26B1                                                       |
| chr2 | 149390792..149520186 | EPC2                                                          |
| chr2 | 198148570..198835702 | ANKRD44,SF3B1,COQ10B,MARS2                                    |
| chr2 | 200161427..200309455 | ENSG00000257045                                               |
| chr2 | 200715272..200847990 | FTCDNL1,TYW5,MAIP1                                            |
| chr2 | 233559312..233753340 | KCNJ13,SNORC                                                  |
| chr3 | 36843149..36945794   | TRANK1                                                        |
| chr3 | 52541253..52903446   | GLT8D1,SPCS1,GNL3,ITIH3                                       |



|       |                      |                                                                     |
|-------|----------------------|---------------------------------------------------------------------|
| chr3  | 63792668..64004101   | C3orf49,THOC7,ENSG00000224479,ATXN7,PSMD6,PSMD6-AS2,ENSG00000271843 |
| chr3  | 135807609..136615413 | MSL2,PCCB,STAG1                                                     |
| chr3  | 180588841..181205593 | DNAJC19,SOX2-OT                                                     |
| chr4  | 170357792..170646088 | CLCN3                                                               |
| chr4  | 176851045..176875795 | GPM6A                                                               |
| chr5  | 60499131..60843553   | ZSWIM6,ENSG00000251682                                              |
| chr5  | 109030041..109208991 | MAN2A1                                                              |
| chr5  | 137598340..137948140 | REEP2,ETF1                                                          |
| chr5  | 140023818..140222641 | TMCO6,NDUFA2,HARS,ZMAT2                                             |
| chr6  | 28303243..28712247   | ZBED9                                                               |
| chr7  | 24619556..24832129   | GSDME                                                               |
| chr7  | 86403211..86459347   | GRM3                                                                |
| chr7  | 104598021..105063238 | LINC01004,ENSG00000272918,RWDD4P1                                   |
| chr7  | 110843795..111205894 | ENSG00000227948                                                     |
| chr8  | 4177791..4192528     | CSMD1,PAICSP4                                                       |
| chr10 | 104423800..105165256 | ARL3,BORCS7,NT5C2,CNNM2,INA,PCGF6,ATP5MD                            |

|       |                      |                                                                                                      |
|-------|----------------------|------------------------------------------------------------------------------------------------------|
| chr11 | 46342942..46751184   | ATG13,ARHGAP1                                                                                        |
| chr11 | 57386178..57682011   | CLP1,MED19,SELENOH,BTBD18,CTNND1                                                                     |
| chr11 | 124610011..124620147 | VSIG2,ESAM                                                                                           |
| chr11 | 130714613..130749351 | SNX19                                                                                                |
| chr11 | 133808038..133852957 | IGSF9B                                                                                               |
| chr12 | 2321868..2523697     | DCP1B,CACNA1C,CACNA1C-AS1,CACNA1C-AS4,CACNA1C-IT3                                                    |
| chr12 | 57428302..57682980   | NEMP1,STAT6,NDUFA4L2                                                                                 |
| chr12 | 123447928..123908948 | PITPNM2                                                                                              |
| chr14 | 103996205..104184737 | APOPT1,ENSG00000246451                                                                               |
| chr15 | 78803057..78926726   | PSMA4                                                                                                |
| chr15 | 84661145..85153716   | EFL1P1,UBE2Q2L,CSPG4P11,GOLGA2P7,GOLGA6L4,ENSG00000259683,DNM1P51,ENSG00000259774,GOLGA6L5P,UBE2Q2P1 |
| chr15 | 91416565..91429042   | FURIN                                                                                                |

|       |                    |                                                      |
|-------|--------------------|------------------------------------------------------|
| chr16 | 29924422..30144379 | ASPHD1,ENSG00000260114,TMEM219,TAOK2,ENSG00000250616 |
| chr16 | 67709262..68311260 | GFOD2,RANBP10,THAP11,DDX28,SLC7A6                    |
| chr17 | 2095954..2220807   | SMG6,SRR                                             |
| chr17 | 17721979..18030240 | DRC3,MYO15A                                          |
| chr18 | 53453353..53804156 | ENSG00000267284,LINC01415                            |
| chr19 | 19374061..19657632 | MAU2                                                 |
| chr19 | 50067508..50135406 | NOSIP                                                |
| chr22 | 39975307..40016767 | CACNA1I                                              |
| chr22 | 41408693..41675126 | EP300                                                |
| chr22 | 42315706..42689370 | LINC00634,SMDT1,NDUFA6,CYP2D6,CYP2D7,TCF20           |
| chrX  | 5916759..6032730   | NLGN4X                                               |

Supplementary Table 5: Inrich Analysis of Overlap between Differentially Expressed Genes in PsychENCODE and 108 GWAS Regions

| Chr   | Position             | Gene                                           |
|-------|----------------------|------------------------------------------------|
| chr1  | 97792597..98559093   | DPYD,SEC63P1,DPYD-AS2,ENSG00000270911,MIR137HG |
| chr1  | 149998923..150242595 | CA14                                           |
| chr1  | 177247854..177300809 | BRINP2                                         |
| chr2  | 57943567..58502233   | VRK2,FANCL                                     |
| chr2  | 198148570..198835702 | ANKRD44,HSPD1,RFTN2,PLCL1                      |
| chr2  | 225334104..225467840 | ENSG00000228446                                |
| chr2  | 233559312..233753340 | KCNJ13                                         |
| chr3  | 2532788..2561691     | CNTN4,CNTN4-AS2                                |
| chr3  | 17221252..17888256   | TBC1D5                                         |
| chr3  | 135807609..136615413 | PPP2R3A                                        |
| chr3  | 180588841..181205593 | SOX2-OT                                        |
| chr5  | 60499131..60843553   | ZSWIM6                                         |
| chr5  | 109030041..109208991 | MAN2A1                                         |
| chr5  | 137598340..137948140 | REEP2,CTNNA1                                   |
| chr5  | 140023818..140222641 | NDUFA2,WDR55,ZMAT2                             |
| chr5  | 151941138..152797656 | LINC01470                                      |
| chr7  | 86403211..86459347   | GRM3                                           |
| chr7  | 104598021..105063238 | KMT2E,SRPK2,ENSG00000272918                    |
| chr10 | 104423800..105165256 | WBP1L,NT5C2                                    |
| chr11 | 46342942..46751184   | ARHGAP1                                        |
| chr11 | 57386178..57682011   | ENSG00000254602                                |
| chr11 | 124610011..124620147 | VSIG2,ESAM                                     |
| chr12 | 57428302..57682980   | SHMT2,NDUFA4L2                                 |

|       |                      |                                    |
|-------|----------------------|------------------------------------|
| chr12 | 123447928..123908948 | OGFOD2,ABCB9,KMT5A,RILPL2          |
| chr14 | 99707933..99719219   | BCL11B                             |
| chr14 | 103996205..104184737 | TRMT61A,ENSG00000246451            |
| chr15 | 84661145..85153716   | ADAMTSL3,ENSG00000259694,UBE2Q2P11 |
| chr15 | 91416565..91429042   | FES                                |
| chr16 | 29924422..30144379   | ASPHD1,PPP4C                       |
| chr16 | 67709262..68311260   | DUS2,NFATC3                        |
| chr19 | 30981639..31038995   | ZNF536                             |
| chr22 | 41408693..41675126   | L3MBTL2,ENSG00000235513            |
| chr22 | 42315706..42689370   | LINC00634,FAM109B                  |
